# Supplementary material
Source: publisher figshare collection journal article supplement (https://gsajournals.figshare.com/articles/dataset/_/14348126)
Supplement: Supplementary file 1 [file 2]

## Sheet: Aging
Table S6. List of diffrentially expressed genes at least two-fold (A).
Aging
FLYBASE_GENE_ID	Name	Mean readcount_Aged non-inf	Mean readcount_Young non-inf	log2FoldChange	pval	padj	Blast swiss prot
FBgn0035019	Ionotropic receptor 60e(Ir60e)	6.00777	0	Inf	0.0018439	0.0095761	-//-
FBgn0266838	ncRNA(CR45300)	8.97112	0	Inf	6.87e-05	0.00053609	sp|P35035|TRY1_ANOGA Trypsin-1 OS=Anopheles gambiae OX=7165 GN=TRYP1 PE=2 SV=3//3.30764e-29
FBgn0267020	ncRNA(CR45464)	5.7138	0	Inf	0.0064841	0.027834	-//-
FBgn0002562	Larval serum protein 1 alpha(Lsp1alpha)	15.3952	0.337732	5.5105	0.00037924	0.002426	sp|P11995|LSP1A_DROME Larval serum protein 1 alpha chain OS=Drosophila melanogaster OX=7227 GN=Lsp1alpha PE=2 SV=3//0
FBgn0051410	Niemann-Pick type C-2e(Npc2e)	240.736	5.39628	5.4793	8.85e-25	4.73e-22	sp|P79345|NPC2_BOVIN NPC intracellular cholesterol transporter 2 OS=Bos taurus OX=9913 GN=NPC2 PE=1 SV=1//2.80246e-08
FBgn0052036	CG32036 gene product from transcript CG32036-RC(CG32036)	7.30604	0.341084	4.4209	0.0020582	0.010559	-//-
FBgn0261681	CG42728 gene product from transcript CG42728-RA(CG42728)	22.7205	1.35428	4.0684	2.11e-06	2.31e-05	-//-
FBgn0050471	CG30471 gene product from transcript CG30471-RB(CG30471)	36.853	2.28221	4.0133	8.16e-12	2.15e-10	sp|Q09225|NRF6_CAEEL Nose resistant to fluoxetine protein 6 OS=Caenorhabditis elegans OX=6239 GN=nrf-6 PE=1 SV=3//3.07849e-41
FBgn0085521	CG40813 gene product from transcript CG40813-RB(CG40813)	8.36942	0.682169	3.6169	0.0023028	0.011642	sp|O74362|ESF2_SCHPO Pre-rRNA-processing protein esf2 OS=Schizosaccharomyces pombe (strain 972 / ATCC 24843) OX=284812 GN=esf2 PE=1 SV=1//7.67477e-24
FBgn0031470	CG18557 gene product from transcript CG18557-RA(CG18557)	48.3174	3.96752	3.6062	3.44e-05	0.00028604	sp|Q9GRW0|PPAF2_HOLDI Phenoloxidase-activating factor 2 OS=Holotrichia diomphalia OX=33394 GN=PPAF2 PE=1 SV=1//2.54733e-54
FBgn0266681	ncRNA(CR45171)	829.589	73.3414	3.4997	2.73e-08	4.17e-07	sp|O02387|CU17_BOMMO Larval cuticle protein LCP-17 OS=Bombyx mori OX=7091 GN=LCP17 PE=2 SV=1//2.60863e-19
FBgn0036110	Cuticular protein 67Fb(Cpr67Fb)	6644.84	618.368	3.4257	6.99e-15	2.86e-13	sp|O02387|CU17_BOMMO Larval cuticle protein LCP-17 OS=Bombyx mori OX=7091 GN=LCP17 PE=2 SV=1//8.01823e-21
FBgn0050098	CG30098 gene product from transcript CG30098-RA(CG30098)	15.3485	1.6034	3.2589	7.75e-05	0.00059558	sp|Q9VB68|GRASS_DROME Serine protease grass OS=Drosophila melanogaster OX=7227 GN=grass PE=1 SV=1//1.02305e-25
FBgn0262357	CG43055 gene product from transcript CG43055-RA(CG43055)	1163.39	124.572	3.2233	2.6e-23	7.85e-21	sp|Q59DY6|LEDL2_DROME C-type lectin 37Da OS=Drosophila melanogaster OX=7227 GN=lectin-37Da PE=2 SV=1//8.37539e-27
FBgn0035176	CG13905 gene product from transcript CG13905-RB(CG13905)	417.965	45.8509	3.1884	7.85e-47	1.26e-42	-//-
FBgn0266837	ncRNA(CR45299)	8.97386	1.01655	3.1421	0.0031289	0.015119	-//-
FBgn0264987	ncRNA(CR44138)	64.3283	7.63957	3.0739	3.14e-14	1.16e-12	-//-
FBgn0028853	CG15263 gene product from transcript CG15263-RA(CG15263)	629.143	74.846	3.0714	3.74e-18	2.68e-16	-//-
FBgn0038160	CG9759 gene product from transcript CG9759-RB(CG9759)	228.317	28.2264	3.0159	5.45e-13	1.68e-11	-//-
FBgn0262533	pseudo(CR43087)	179.825	23.9139	2.9107	9.76e-27	8.24e-24	sp|P81657|VA5_VESMA Venom allergen 5 OS=Vespa mandarinia OX=7446 PE=1 SV=1//5.45283e-12
FBgn0266691	ncRNA(CR45181)	14.7275	1.95993	2.9096	0.00029577	0.0019544	-//-
FBgn0065076	ncRNA(snoRNA:185)	7.34315	1.0199	2.848	0.01274	0.049185	-//-
FBgn0036951	CG7017 gene product from transcript CG7017-RB(CG7017)	121.302	17.8017	2.7685	0.0013382	0.0072628	sp|P91745|PE48A_LUCCU Peritrophin-48 OS=Lucilia cuprina OX=7375 PE=1 SV=1//1.92811e-14
FBgn0263660	ncRNA(CR43651)	25.6907	3.98428	2.6889	4.23e-06	4.34e-05	-//-
FBgn0038002	CG12256 gene product from transcript CG12256-RA(CG12256)	1196.12	187.34	2.6746	8.08e-22	1.33e-19	sp|Q7SIG2|CTR1_SOLIN Chymotrypsin-1 OS=Solenopsis invicta OX=13686 PE=1 SV=1//1.68718e-38
FBgn0264295	CG43773 gene product from transcript CG43773-RA(CG43773)	146.255	24.7223	2.5646	0.00053682	0.0032796	-//-
FBgn0052284	CG32284 gene product from transcript CG32284-RA(CG32284)	109.784	18.59	2.5621	8.37e-16	3.91e-14	-//-
FBgn0266020	ncRNA(CR44785)	17.6565	3.00869	2.553	0.0002073	0.0014293	-//-
FBgn0040837	CG8620 gene product from transcript CG8620-RA(CG8620)	1663.8	285.009	2.5454	2.35e-13	7.54e-12	-//-
FBgn0267106	CG45546 gene product from transcript CG45546-RA(CG45546)	214.195	37.8985	2.4987	0.0026521	0.013099	-//-
FBgn0030270	CG15199 gene product from transcript CG15199-RA(CG15199)	3105.46	550.18	2.4968	4.97e-12	1.35e-10	-//-
FBgn0065055	ncRNA(snoRNA:Psi28S-2648)	12.991	2.35203	2.4655	0.0019124	0.00989	-//-
FBgn0039685	Odorant-binding protein 99b(Obp99b)	22688.5	4164.08	2.4459	1.18e-09	2.27e-08	sp|Q9VAI6|OB99B_DROME General odorant-binding protein 99b OS=Drosophila melanogaster OX=7227 GN=Obp99b PE=2 SV=1//5.0603e-89
FBgn0265345	ncRNA(CR44299)	64.8258	12.0644	2.4258	5e-06	5.04e-05	-//-
FBgn0040503	CG7763 gene product from transcript CG7763-RB(CG7763)	23.2906	4.35626	2.4186	3.88e-05	0.00031891	sp|O46197|A29AB_DROME Accessory gland protein Acp29AB OS=Drosophila melanogaster OX=7227 GN=Acp29AB PE=2 SV=2//1.12163e-12
FBgn0035412	CG14957 gene product from transcript CG14957-RA(CG14957)	10.3381	1.94113	2.413	0.0077753	0.032472	-//-
FBgn0050121	ncRNA(CR30121)	12.282	2.30772	2.412	0.003153	0.01523	-//-
FBgn0262608	CG43134 gene product from transcript CG43134-RA(CG43134)	816.385	159.892	2.3522	3.12e-05	0.00026226	-//-
FBgn0035886	Jonah 66Ci(Jon66Ci)	26.8762	5.31641	2.3378	1.71e-05	0.00015262	sp|C0HKF8|SER2_DROME Serine protease 2 OS=Drosophila melanogaster OX=7227 GN=Jon99Ciii PE=2 SV=1//2.74721e-79
FBgn0266457	ncRNA(CR45082)	9.9644	2.01765	2.3041	0.0098409	0.039733	-//-
FBgn0030187	Interaction partner of Dnmt2(Ipod)	43.9365	9.01936	2.2843	1.11e-07	1.52e-06	-//-
FBgn0261503	ncRNA(CR42651)	29.3767	6.05498	2.2785	1.02e-05	9.68e-05	-//-
FBgn0014464	Chorion protein a at 7F(Cp7Fa)	10.9893	2.30772	2.2516	0.0080839	0.033487	-//-
FBgn0034622	CG15666 gene product from transcript CG15666-RD(CG15666)	187.911	40.0826	2.229	3.39e-19	2.89e-17	sp|Q6AX60|PTHB1_XENLA Protein PTHB1 OS=Xenopus laevis OX=8355 GN=bbs9 PE=2 SV=1//7.10078e-90
FBgn0003450	snake(snk)	12.5774	2.70521	2.217	0.006674	0.02853	sp|P05049|SNAK_DROME Serine protease snake OS=Drosophila melanogaster OX=7227 GN=snk PE=1 SV=2//0
FBgn0051634	Organic anion transporting polypeptide 26F(Oatp26F)	42.696	9.24968	2.2066	3.82e-07	4.74e-06	sp|Q8K078|SO4A1_MOUSE Solute carrier organic anion transporter family member 4A1 OS=Mus musculus OX=10090 GN=Slco4a1 PE=1 SV=2//1.18584e-164
FBgn0000276	Cecropin A1(CecA1)	1724.62	380.981	2.1785	5.7e-10	1.14e-08	sp|C0HKQ8|CECA2_DROME Cecropin-A2 OS=Drosophila melanogaster OX=7227 GN=CecA2 PE=2 SV=1//5.97898e-29
FBgn0036767	CG16775 gene product from transcript CG16775-RB(CG16775)	583.13	129.112	2.1752	1.48e-06	1.66e-05	-//-
FBgn0031775	CG9150 gene product from transcript CG9150-RB(CG9150)	149.991	33.9511	2.1433	4.54e-16	2.24e-14	sp|D2WKD9|SDR1_AEDAE Farnesol dehydrogenase OS=Aedes aegypti OX=7159 GN=SDR-1 PE=1 SV=2//6.60622e-83
FBgn0265813	ncRNA(CR44602)	18.6484	4.30321	2.1156	0.00083974	0.0048303	-//-
FBgn0031562	CG3604 gene product from transcript CG3604-RB(CG3604)	2212.33	511.517	2.1127	2.3e-14	8.74e-13	sp|B2BS84|VKT_AUSLA Putative Kunitz-type serine protease inhibitor OS=Austrelaps labialis OX=471292 PE=2 SV=1//3.44023e-08
FBgn0053926	CG33926 gene product from transcript CG33926-RB(CG33926)	8833.29	2044.85	2.111	2.94e-31	5.89e-28	-//-
FBgn0085582	ncRNA(CR41257)	60.3978	14.0135	2.1077	1.01e-08	1.68e-07	-//-
FBgn0034741	CG4269 gene product from transcript CG4269-RB(CG4269)	1199.18	279.281	2.1023	3.15e-33	8.41e-30	-//-
FBgn0053258	CG33258 gene product from transcript CG33258-RB(CG33258)	4546.09	1104.94	2.0407	1.47e-08	2.35e-07	-//-
FBgn0052029	Cuticular protein 66D(Cpr66D)	112.333	27.7168	2.0189	2.53e-12	7.18e-11	sp|P80683|CUA3A_TENMO Larval cuticle protein A3A OS=Tenebrio molitor OX=7067 PE=1 SV=1//1.48669e-12
FBgn0261833	ncRNA(CR42765)	40.5199	10.0138	2.0166	0.0072343	0.030563	-//-
FBgn0265666	ncRNA(CR44473)	107.915	26.862	2.0062	1.27e-06	1.44e-05	-//-
FBgn0033374	CG13741 gene product from transcript CG13741-RA(CG13741)	122.981	30.9888	1.9886	8.59e-13	2.56e-11	-//-
FBgn0267145	ncRNA(CR45585)	207.917	52.5001	1.9856	4.71e-11	1.09e-09	-//-
FBgn0267667	ncRNA(CR46005)	18.0343	4.64969	1.9555	0.001934	0.0099791	sp|P52302|MBN_DROME Protein lethal(3)malignant blood neoplasm 1 OS=Drosophila melanogaster OX=7227 GN=l(3)mbn PE=2 SV=2//1.08291e-06
FBgn0262901	ncRNA(CR43256)	111.584	28.8173	1.9531	8.69e-12	2.27e-10	-//-
FBgn0037850	CG14695 gene product from transcript CG14695-RA(CG14695)	153.428	39.6421	1.9525	2.32e-14	8.78e-13	-//-
FBgn0035409	CG14963 gene product from transcript CG14963-RA(CG14963)	105.299	27.2139	1.9521	2.22e-11	5.41e-10	-//-
FBgn0264347	ncRNA(CR43803)	461.99	119.643	1.9491	0.0091395	0.037324	-//-
FBgn0054040	CG34040 gene product from transcript CG34040-RA(CG34040)	1117.68	291.629	1.9383	6.43e-05	0.0005055	-//-
FBgn0052447	CG32447 gene product from transcript CG32447-RD(CG32447)	38.6569	10.1165	1.934	1.2e-05	0.0001118	-//-
FBgn0003482	spindle D(spn-D)	19.8752	5.26875	1.9154	0.011437	0.04503	sp|Q924H5|RA51C_MOUSE DNA repair protein RAD51 homolog 3 OS=Mus musculus OX=10090 GN=Rad51c PE=2 SV=1//1.78586e-33
FBgn0033836	CG18278 gene product from transcript CG18278-RA(CG18278)	299.773	79.5152	1.9146	1.68e-08	2.67e-07	sp|Q8BFR4|GNS_MOUSE N-acetylglucosamine-6-sulfatase OS=Mus musculus OX=10090 GN=Gns PE=1 SV=1//5.1327e-134
FBgn0053511	CG33511 gene product from transcript CG33511-RB(CG33511)	611.352	162.693	1.9099	3.65e-11	8.6e-10	-//-
FBgn0035343	CG16762 gene product from transcript CG16762-RA(CG16762)	228.353	60.8932	1.9069	1.35e-08	2.19e-07	-//-
FBgn0052368	CG32368 gene product from transcript CG32368-RA(CG32368)	1954.73	533.508	1.8734	4.51e-21	5.79e-19	-//-
FBgn0040582	CG5791 gene product from transcript CG5791-RB(CG5791)	7330.78	2005.38	1.8701	2.95e-08	4.46e-07	-//-
FBgn0058469	ncRNA(CR40469)	172.347	47.3831	1.8629	0.0060337	0.026194	-//-
FBgn0040531	CG11741 gene product from transcript CG11741-RA(CG11741)	38.9949	10.7671	1.8567	1.4e-05	0.00012858	-//-
FBgn0266044	ncRNA(CR44809)	43.7456	12.1087	1.8531	7.63e-06	7.43e-05	-//-
FBgn0262838	CG43202 gene product from transcript CG43202-RA(CG43202)	463.494	129.152	1.8435	1.81e-21	2.57e-19	-//-
FBgn0036766	CG5506 gene product from transcript CG5506-RA(CG5506)	5165.77	1448.7	1.8342	2.97e-08	4.49e-07	-//-
FBgn0034454	CG15120 gene product from transcript CG15120-RA(CG15120)	507.517	143.528	1.8221	1.47e-10	3.19e-09	sp|Q9DAK2|PACRG_MOUSE Parkin coregulated gene protein homolog OS=Mus musculus OX=10090 GN=Pacrg PE=1 SV=1//2.22044e-81
FBgn0033659	Death associated molecule related to Mch2 caspase(Damm)	1923.27	546.145	1.8162	3.48e-12	9.64e-11	sp|Q3T0P5|CASP6_BOVIN Caspase-6 OS=Bos taurus OX=9913 GN=CASP6 PE=2 SV=1//1.28384e-17
FBgn0035929	CG13311 gene product from transcript CG13311-RA(CG13311)	712.175	202.362	1.8153	2.16e-06	2.36e-05	-//-
FBgn0037635	CG9837 gene product from transcript CG9837-RF(CG9837)	711.611	203.69	1.8047	8.81e-14	3.01e-12	-//-
FBgn0260004	Sensory neuron membrane protein 1(Snmp1)	656.679	188.246	1.8026	1.6e-20	1.81e-18	sp|Q9VDD3|SNMP1_DROME Sensory neuron membrane protein 1 OS=Drosophila melanogaster OX=7227 GN=Snmp1 PE=1 SV=2//0
FBgn0265053	ncRNA(CR44168)	143.448	41.2939	1.7965	0.00019521	0.0013606	-//-
FBgn0033788	CG13323 gene product from transcript CG13323-RB(CG13323)	3529.6	1017.94	1.7938	5.69e-06	5.67e-05	-//-
FBgn0053265	Mucin 68E(Muc68E)	751.05	218.108	1.7839	1.12e-05	0.00010518	sp|O76217|PE1_ANOGA Peritrophin-1 OS=Anopheles gambiae OX=7165 GN=Aper1 PE=2 SV=2//4.52026e-08
FBgn0267804	ncRNA(CR46129)	17.0795	5.01292	1.7685	0.012078	0.04712	-//-
FBgn0040104	CG3410 gene product from transcript CG3410-RA(lectin-24A)	239.918	70.5859	1.7651	2.45e-07	3.14e-06	sp|Q9U968|A29AB_DROSI Accessory gland protein Acp29AB OS=Drosophila simulans OX=7240 GN=Acp29AB PE=3 SV=1//1.18315e-19
FBgn0036046	Insulin-like peptide 2(Ilp2)	733.285	216.423	1.7605	4.53e-06	4.61e-05	sp|Q9VT51|INSL2_DROME Probable insulin-like peptide 2 OS=Drosophila melanogaster OX=7227 GN=Ilp2 PE=2 SV=1//7.49311e-95
FBgn0030583	CG14410 gene product from transcript CG14410-RA(CG14410)	21.2036	6.25979	1.7601	0.0018763	0.0097224	-//-
FBgn0266414	ncRNA(CR45054)	64.5453	19.0815	1.7581	3.52e-07	4.39e-06	-//-
FBgn0002609	Enhancer of split m3, helix-loop-helix(E(spl)m3-HLH)	89.8197	26.5774	1.7568	5.72e-09	9.91e-08	sp|Q01068|ESM3_DROME Enhancer of split m3 protein OS=Drosophila melanogaster OX=7227 GN=E(spl)m3-HLH PE=1 SV=1//7.32033e-127
FBgn0267074	ncRNA(CR45518)	15.67	4.65304	1.7518	0.0092697	0.037759	-//-
FBgn0266931	ncRNA(CR45382)	20.9771	6.27859	1.7403	0.0022262	0.011302	-//-
FBgn0267237	ncRNA(CR45677)	18.647	5.62863	1.7281	0.0040563	0.018824	-//-
FBgn0051077	CG31077 gene product from transcript CG31077-RB(CG31077)	1302.04	393.034	1.728	1.11e-05	0.0001048	sp|Q9W5U2|CHI10_DROME Probable chitinase 10 OS=Drosophila melanogaster OX=7227 GN=Cht10 PE=2 SV=2//8.95594e-06
FBgn0085452	CG34423 gene product from transcript CG34423-RB(CG34423)	2013.46	611.031	1.7204	3.31e-09	5.97e-08	-//-
FBgn0262569	CG43109 gene product from transcript CG43109-RA(CG43109)	86.132	26.3437	1.7091	0.00063157	0.0037878	-//-
FBgn0265104	ncRNA(CR44206)	16.3032	4.99077	1.7078	0.0075133	0.031526	-//-
FBgn0004431	Lysozyme X(LysX)	202.647	62.0453	1.7076	1.78e-13	5.79e-12	sp|P37161|LYSX_DROME Lysozyme X OS=Drosophila melanogaster OX=7227 GN=LysX PE=2 SV=2//4.90149e-102
FBgn0033789	CG13324 gene product from transcript CG13324-RA(CG13324)	210.829	64.7235	1.7037	0.0069733	0.029663	-//-
FBgn0085265	CG34236 gene product from transcript CG34236-RC(CG34236)	372.207	114.265	1.7037	1.77e-13	5.77e-12	-//-
FBgn0040735	CG16836 gene product from transcript CG16836-RA(CG16836)	9498.78	2932.02	1.6958	5.33e-11	1.22e-09	-//-
FBgn0037562	CG11671 gene product from transcript CG11671-RA(CG11671)	609.646	189.205	1.688	5.81e-20	5.75e-18	-//-
FBgn0010385	Defensin(Def)	2128.19	663.282	1.6819	1.3e-06	1.47e-05	sp|P36192|DEFI_DROME Defensin OS=Drosophila melanogaster OX=7227 GN=Def PE=3 SV=1//7.06239e-48
FBgn0032281	CG17107 gene product from transcript CG17107-RB(CG17107)	180.899	56.5481	1.6776	1.62e-12	4.69e-11	-//-
FBgn0085256	CG34227 gene product from transcript CG34227-RA(CG34227)	1791.58	560.353	1.6768	0.00012315	0.00090223	-//-
FBgn0035112	CG13877 gene product from transcript CG13877-RB(CG13877)	652.185	204.222	1.6751	2.45e-09	4.52e-08	-//-
FBgn0039452	CG14245 gene product from transcript CG14245-RB(CG14245)	1536.16	481.228	1.6745	1e-07	1.38e-06	-//-
FBgn0266800	ncRNA(CR45262)	17.0301	5.3473	1.6712	0.007211	0.030472	-//-
FBgn0034511	GNBP-like 3(GNBP-like3)	2813.82	895.464	1.6518	7.91e-10	1.55e-08	sp|Q9NHA8|BGBP3_DROME Gram-negative bacteria-binding protein 3 OS=Drosophila melanogaster OX=7227 GN=GNBP3 PE=1 SV=2//3.67872e-33
FBgn0085320	CG34291 gene product from transcript CG34291-RA(CG34291)	1299.95	413.99	1.6508	1.77e-10	3.8e-09	-//-
FBgn0033927	pseudo(CR10102)	757.024	244.2	1.6323	7.14e-20	6.94e-18	sp|Q7K1U0|ARC1_DROME Activity-regulated cytoskeleton associated protein 1 OS=Drosophila melanogaster OX=7227 GN=Arc1 PE=1 SV=1//2.16594e-106
FBgn0032087	CG9568 gene product from transcript CG9568-RA(CG9568)	5489.59	1774.31	1.6294	1.43e-05	0.00013066	-//-
FBgn0264904	ncRNA(CR44095)	1023.88	331.325	1.6277	0.00016476	0.0011713	sp|P23779|CYTL_DROME Cystatin-like protein OS=Drosophila melanogaster OX=7227 GN=Cys PE=2 SV=2//4.11103e-33
FBgn0033926	Activity-regulated cytoskeleton associated protein 1(Arc1)	17784.6	5784.47	1.6204	6.35e-25	3.64e-22	sp|Q7K1U0|ARC1_DROME Activity-regulated cytoskeleton associated protein 1 OS=Drosophila melanogaster OX=7227 GN=Arc1 PE=1 SV=1//1.04264e-160
FBgn0038291	CG3984 gene product from transcript CG3984-RA(CG3984)	234.352	76.2837	1.6192	2.16e-13	6.94e-12	-//-
FBgn0266162	ncRNA(CR44868)	17.5919	5.73066	1.6181	0.006995	0.029748	-//-
FBgn0040736	Immune induced molecule 3(IM3)	6499.49	2120.03	1.6162	8.47e-09	1.42e-07	-//-
FBgn0067905	Immune induced molecule 14(IM14)	2725.83	895.491	1.6059	1.81e-05	0.00016059	sp|P83869|IM14_DROME Immune-induced peptide 14 OS=Drosophila melanogaster OX=7227 GN=IM14 PE=1 SV=2//2.96925e-10
FBgn0034480	CG16898 gene product from transcript CG16898-RA(CG16898)	1035.91	340.85	1.6037	4.46e-08	6.55e-07	-//-
FBgn0085195	CG34166 gene product from transcript CG34166-RD(CG34166)	9265.54	3059.46	1.5986	1.94e-05	0.00017064	-//-
FBgn0034255	Oxpecker(Oxp)	108.563	35.9143	1.5959	8.05e-09	1.36e-07	sp|P05205|HP1_DROME Heterochromatin protein 1 OS=Drosophila melanogaster OX=7227 GN=Su(var)205 PE=1 SV=2//8.88642e-08
FBgn0050289	CG30289 gene product from transcript CG30289-RA(CG30289)	35.0314	11.6171	1.5924	0.00027426	0.0018326	sp|Q9VCJ8|SPE_DROME Spaetzle-processing enzyme OS=Drosophila melanogaster OX=7227 GN=SPE PE=1 SV=2//1.78488e-39
FBgn0031558	CG16704 gene product from transcript CG16704-RB(CG16704)	1480.89	491.286	1.5918	7.38e-14	2.55e-12	sp|P11424|IMAP_DROFU Male accessory gland serine protease inhibitor OS=Drosophila funebris OX=7221 GN=PapD PE=1 SV=1//4.24197e-08
FBgn0265719	ncRNA(CR44526)	40.3453	13.4475	1.5851	0.00012949	0.00094522	-//-
FBgn0054043	CG34043 gene product from transcript CG34043-RB(CG34043)	1041.74	349.348	1.5763	1.88e-06	2.08e-05	-//-
FBgn0034329	Immune induced molecule 1(IM1)	9268.61	3109.74	1.5756	0.00013841	0.0010034	sp|P82706|IM01_DROME Immune-induced peptide 1 OS=Drosophila melanogaster OX=7227 GN=IM1 PE=1 SV=2//4.55301e-24
FBgn0033875	CG6357 gene product from transcript CG6357-RA(CG6357)	10917.2	3663.53	1.5753	4.13e-15	1.76e-13	sp|Q24940|CATLL_FASHE Cathepsin L-like proteinase OS=Fasciola hepatica OX=6192 GN=Cat-1 PE=1 SV=1//3.30742e-07
FBgn0039073	CG4408 gene product from transcript CG4408-RA(CG4408)	287.471	96.7275	1.5714	6.18e-14	2.18e-12	sp|O02350|CBPA1_ANOGA Zinc carboxypeptidase A 1 OS=Anopheles gambiae OX=7165 GN=AGAP009593 PE=2 SV=3//2.25306e-109
FBgn0260396	CG42521 gene product from transcript CG42521-RA(CG42521)	5982.06	2017.35	1.5682	9.64e-06	9.23e-05	-//-
FBgn0265633	ncRNA(CR44440)	60.6368	20.4714	1.5666	5.8e-06	5.76e-05	-//-
FBgn0039091	CG10182 gene product from transcript CG10182-RA(CG10182)	52.1918	17.6446	1.5646	1.84e-05	0.00016272	sp|Q09225|NRF6_CAEEL Nose resistant to fluoxetine protein 6 OS=Caenorhabditis elegans OX=6239 GN=nrf-6 PE=1 SV=3//4.17555e-41
FBgn0259237	CG42335 gene product from transcript CG42335-RE(CG42335)	126.126	42.7428	1.5611	1.17e-08	1.92e-07	sp|Q11000|AMPM_HELVI Membrane alanyl aminopeptidase OS=Heliothis virescens OX=7102 PE=1 SV=1//4.07329e-93
FBgn0033826	CG4734 gene product from transcript CG4734-RA(CG4734)	930.833	316.063	1.5583	0.0012875	0.0070252	-//-
FBgn0037236	CG9772 gene product from transcript CG9772-RA(Skp2)	4390.1	1491.31	1.5577	2.72e-05	0.00023198	sp|Q9Z0Z3|SKP2_MOUSE S-phase kinase-associated protein 2 OS=Mus musculus OX=10090 GN=Skp2 PE=1 SV=1//1.40292e-53
FBgn0045800	U snoRNA host gene 1(Uhg1)	271.911	92.7015	1.5525	1.88e-13	6.09e-12	-//-
FBgn0014396	timeless(tim)	3522.87	1202.84	1.5503	5.04e-22	8.98e-20	sp|P49021|TIM_DROME Protein timeless OS=Drosophila melanogaster OX=7227 GN=tim PE=1 SV=3//2.10976e-134
FBgn0034331	CG15067 gene product from transcript CG15067-RA(CG15067)	24644.4	8427.63	1.5481	2.61e-12	7.39e-11	-//-
FBgn0063923	CG1220 gene product from transcript CG1220-RE(Kaz1-ORFB)	1297.19	443.613	1.548	7.51e-16	3.56e-14	-//-
FBgn0034614	CG9752 gene product from transcript CG9752-RA(CG9752)	456.202	156.123	1.547	2.14e-05	0.0001871	sp|Q1JP73|QSPP_BOVIN Queuosine salvage protein OS=Bos taurus OX=9913 PE=2 SV=1//4.0846e-97
FBgn0267160	ncRNA(CR45600)	30.2915	10.3736	1.546	0.00079444	0.0046014	-//-
FBgn0085223	CG34194 gene product from transcript CG34194-RB(CG34194)	109.008	37.3982	1.5434	0.0007297	0.0042959	sp|Q925E8|SPTSB_MOUSE Serine palmitoyltransferase small subunit B OS=Mus musculus OX=10090 GN=Sptssb PE=2 SV=1//3.39703e-07
FBgn0053510	CG33510 gene product from transcript CG33510-RB(CG33510)	19.3862	6.65524	1.5425	0.007346	0.030961	-//-
FBgn0085244	CG34215 gene product from transcript CG34215-RA(CG34215)	1091.78	375.092	1.5414	1.33e-11	3.36e-10	-//-
FBgn0033798	CG15870 gene product from transcript CG15870-RA(CG15870)	172.294	59.2468	1.5401	2.88e-06	3.07e-05	-//-
FBgn0032472	CG9928 gene product from transcript CG9928-RB(CG9928)	8103.17	2793.49	1.5364	3.99e-08	5.91e-07	-//-
FBgn0035282	CNMamide(CNMa)	107.704	37.1765	1.5346	2.59e-08	3.97e-07	-//-
FBgn0034289	CG10910 gene product from transcript CG10910-RB(CG10910)	565.598	197.768	1.516	7.95e-05	0.00060853	sp|A2VD00|EIF3A_XENLA Eukaryotic translation initiation factor 3 subunit A OS=Xenopus laevis OX=8355 GN=eif3a PE=2 SV=1//9.92089e-35
FBgn0267443	ncRNA(CR45793)	132.879	46.5524	1.5132	0.0002569	0.0017304	-//-
FBgn0266690	ncRNA(CR45180)	26.2992	9.21411	1.5131	0.0045363	0.020632	sp|P20825|POL2_DROME Retrovirus-related Pol polyprotein from transposon 297 OS=Drosophila melanogaster OX=7227 GN=pol PE=3 SV=1//2.47948e-13
FBgn0263650	ncRNA(CR43641)	158.653	55.674	1.5108	5.54e-10	1.11e-08	-//-
FBgn0265873	ncRNA(CR44662)	132.81	46.8332	1.5038	2.08e-08	3.24e-07	-//-
FBgn0030929	CG15043 gene product from transcript CG15043-RB(CG15043)	4345.54	1537.3	1.4991	3.63e-08	5.43e-07	-//-
FBgn0035933	CG13309 gene product from transcript CG13309-RA(CG13309)	1644.69	582.044	1.4986	3.52e-06	3.68e-05	-//-
FBgn0283461	Drosomycin(Drs)	3701.81	1319	1.4888	0.006797	0.028995	sp|P41964|DMYC_DROME Drosomycin OS=Drosophila melanogaster OX=7227 GN=Drs PE=1 SV=1//1.4039e-34
FBgn0260437	pseudo(CR42532)	43.0038	15.3248	1.4886	0.009115	0.037252	-//-
FBgn0085485	CG34456 gene product from transcript CG34456-RA(CG34456)	127.655	45.5314	1.4873	0.00032395	0.0021162	-//-
FBgn0051092	Lipophorin receptor 2(LpR2)	5863.04	2099.03	1.4819	9.15e-13	2.71e-11	sp|P98155|VLDLR_HUMAN Very low-density lipoprotein receptor OS=Homo sapiens OX=9606 GN=VLDLR PE=1 SV=1//0
FBgn0034160	CG5550 gene product from transcript CG5550-RB(CG5550)	82.6346	29.5907	1.4816	8.9e-07	1.04e-05	sp|Q29042|FCN1_PIG Ficolin-1 OS=Sus scrofa OX=9823 GN=FCN1 PE=1 SV=1//1.12444e-44
FBgn0025583	Immune induced molecule 2(IM2)	23508.6	8428.14	1.4799	1.6e-08	2.56e-07	sp|P82706|IM01_DROME Immune-induced peptide 1 OS=Drosophila melanogaster OX=7227 GN=IM1 PE=1 SV=2//1.2453e-21
FBgn0022355	Transferrin 1(Tsf1)	28569.9	10252.5	1.4785	1.95e-21	2.74e-19	sp|Q26643|TRF_SARPE Transferrin OS=Sarcophaga peregrina OX=7386 PE=1 SV=1//0
FBgn0053307	CG33307 gene product from transcript CG33307-RB(CG33307)	994.625	357.785	1.4751	1.12e-07	1.53e-06	-//-
FBgn0031560	CG16713 gene product from transcript CG16713-RA(CG16713)	5407.89	1955.93	1.4672	8.56e-09	1.44e-07	sp|P11424|IMAP_DROFU Male accessory gland serine protease inhibitor OS=Drosophila funebris OX=7221 GN=PapD PE=1 SV=1//6.15136e-18
FBgn0052023	CG32023 gene product from transcript CG32023-RA(CG32023)	651.226	237.732	1.4538	2.04e-07	2.66e-06	-//-
FBgn0053337	CG33337 gene product from transcript CG33337-RB(CG33337)	20.6432	7.53755	1.4535	0.008986	0.036791	sp|Q09225|NRF6_CAEEL Nose resistant to fluoxetine protein 6 OS=Caenorhabditis elegans OX=6239 GN=nrf-6 PE=1 SV=3//5.53803e-39
FBgn0051832	CG31832 gene product from transcript CG31832-RB(CG31832)	85.9164	31.3989	1.4522	4.52e-05	0.00036522	sp|O95841|ANGL1_HUMAN Angiopoietin-related protein 1 OS=Homo sapiens OX=9606 GN=ANGPTL1 PE=2 SV=1//8.52766e-43
FBgn0085453	CG34424 gene product from transcript CG34424-RA(CG34424)	4860.24	1781.32	1.4481	2.48e-11	6.02e-10	sp|Q9D110|MTHFS_MOUSE 5-formyltetrahydrofolate cyclo-ligase OS=Mus musculus OX=10090 GN=Mthfs PE=2 SV=2//3.88627e-41
FBgn0085241	CG34212 gene product from transcript CG34212-RB(CG34212)	5860.23	2149.54	1.4469	0.00088149	0.0050397	-//-
FBgn0085319	CG34290 gene product from transcript CG34290-RB(CG34290)	158.477	58.2395	1.4442	2.02e-09	3.75e-08	sp|P0CW18|PRS56_HUMAN Serine protease 56 OS=Homo sapiens OX=9606 GN=PRSS56 PE=1 SV=1//6.96326e-27
FBgn0035669	CG6592 gene product from transcript CG6592-RA(CG6592)	35.9848	13.2904	1.437	0.00067686	0.0040188	sp|Q00871|CTRB1_LITVA Chymotrypsin BI OS=Litopenaeus vannamei OX=6689 PE=1 SV=1//1.40792e-50
FBgn0053470	CG33470 gene product from transcript CG33470-RA(CG33470)	39.6254	14.6601	1.4345	0.00037975	0.0024283	sp|Q8ML70|IMPP_DROME Immune-induced peptides OS=Drosophila melanogaster OX=7227 GN=IMPPP PE=1 SV=3//0
FBgn0040958	CG31893 gene product from transcript CG31893-RC(Peritrophin-15b)	203.737	75.78	1.4268	3.1e-05	0.00026097	-//-
FBgn0267944	ncRNA(CR46224)	20.3849	7.58856	1.4256	0.010455	0.041759	-//-
FBgn0264835	ncRNA(CR44043)	40.2353	14.9857	1.4249	0.00036805	0.0023742	-//-
FBgn0040734	CG15065 gene product from transcript CG15065-RA(CG15065)	3597.07	1344	1.4203	1.72e-05	0.0001533	sp|Q9V8G0|IM03_DROME Immune-induced peptide 3 OS=Drosophila melanogaster OX=7227 GN=IM3 PE=1 SV=1//3.34394e-13
FBgn0023535	arginase(arg)	710.951	266.291	1.4167	1e-15	4.61e-14	sp|P78540|ARGI2_HUMAN Arginase-2, mitochondrial OS=Homo sapiens OX=9606 GN=ARG2 PE=1 SV=1//6.50309e-71
FBgn0085330	CG34301 gene product from transcript CG34301-RA(CG34301)	308.955	116.651	1.4052	1.09e-06	1.25e-05	-//-
FBgn0002868	Metallothionein A(MtnA)	164174	62208.8	1.4	1.6e-05	0.00014416	sp|P04357|MT1_DROME Metallothionein-1 OS=Drosophila melanogaster OX=7227 GN=MtnA PE=2 SV=1//4.95433e-16
FBgn0266037	ncRNA(CR44802)	23.417	8.88308	1.3984	0.0094625	0.038422	-//-
FBgn0038273	CG14860 gene product from transcript CG14860-RB(CG14860)	32.3771	12.3181	1.3942	0.0015741	0.0083671	sp|Q9XZ06|NU931_DROME Nuclear pore complex protein Nup93-1 OS=Drosophila melanogaster OX=7227 GN=Nup93-1 PE=1 SV=1//1.39107e-45
FBgn0266095	ncRNA(CR44832)	2068.52	789.803	1.389	1.02e-06	1.18e-05	-//-
FBgn0053109	CG33109 gene product from transcript CG33109-RA(CG33109)	2527.81	966.783	1.3866	3.78e-06	3.93e-05	-//-
FBgn0051755	Sister of Yb(SoYb)	37.1139	14.2425	1.3818	0.0034146	0.016302	sp|Q9VL52|SOYB_DROME Putative ATP-dependent RNA helicase SoYb OS=Drosophila melanogaster OX=7227 GN=SoYb PE=2 SV=3//0
FBgn0003719	tolloid(tld)	44.9491	17.2646	1.3805	0.00028663	0.0019034	sp|P25723|TLD_DROME Dorsal-ventral patterning protein tolloid OS=Drosophila melanogaster OX=7227 GN=tld PE=2 SV=2//0
FBgn0038702	CG3739 gene product from transcript CG3739-RB(CG3739)	1335.06	513.187	1.3793	1.03e-12	3.03e-11	sp|P34528|YM67_CAEEL Putative serine protease K12H4.7 OS=Caenorhabditis elegans OX=6239 GN=K12H4.7 PE=3 SV=2//3.51553e-50
FBgn0262881	CG43236 gene product from transcript CG43236-RB(CG43236)	80.4912	30.9504	1.3789	4.28e-06	4.38e-05	-//-
FBgn0033754	Adenylate kinase 6(Ak6)	281.512	108.437	1.3763	3.01e-11	7.22e-10	sp|Q7JYV7|KAD6_DROME Adenylate kinase isoenzyme 6 homolog OS=Drosophila melanogaster OX=7227 GN=Ak6 PE=1 SV=1//3.44961e-127
FBgn0265308	ncRNA(CR44281)	102.785	39.5965	1.3762	5.92e-07	7.11e-06	-//-
FBgn0054054	CG34054 gene product from transcript CG34054-RA(CG34054)	175.978	67.9094	1.3737	3.31e-09	5.97e-08	-//-
FBgn0083123	ncRNA(Uhg5)	649.199	250.666	1.3729	2.1e-14	8.03e-13	-//-
FBgn0262532	pseudo(CR43086)	61.7071	23.8366	1.3723	0.00016637	0.0011806	sp|P35782|VA52_VESCR Venom allergen 5.02 OS=Vespa crabro OX=7445 PE=1 SV=1//1.61106e-11
FBgn0262366	CG43064 gene product from transcript CG43064-RB(CG43064)	161.998	62.5871	1.372	9.39e-09	1.57e-07	-//-
FBgn0265202	ncRNA(CR44262)	230.411	89.0632	1.3713	5.39e-05	0.00042966	-//-
FBgn0033301	CG12780 gene product from transcript CG12780-RA(CG12780)	581.398	225.302	1.3677	3.05e-09	5.53e-08	sp|Q9NHA8|BGBP3_DROME Gram-negative bacteria-binding protein 3 OS=Drosophila melanogaster OX=7227 GN=GNBP3 PE=1 SV=2//1.41073e-23
FBgn0051446	CG31446 gene product from transcript CG31446-RB(CG31446)	315.307	122.314	1.3662	3.23e-05	0.00027046	-//-
FBgn0053469	CG33469 gene product from transcript CG33469-RB(CG33469)	150.674	58.4685	1.3657	2.93e-08	4.44e-07	-//-
FBgn0036419	CG13482 gene product from transcript CG13482-RA(CG13482)	61.7552	23.9917	1.364	0.00012491	0.00091348	-//-
FBgn0039200	CG13616 gene product from transcript CG13616-RB(CG13616)	34.3897	13.3702	1.363	0.0051724	0.023067	-//-
FBgn0026190	prolyl-4-hydroxylase-alpha MP(PH4alphaMP)	52.3046	20.3498	1.3619	0.00014051	0.001015	sp|O15460|P4HA2_HUMAN Prolyl 4-hydroxylase subunit alpha-2 OS=Homo sapiens OX=9606 GN=P4HA2 PE=1 SV=1//3.19023e-94
FBgn0265497	ncRNA(CR44366)	25.7292	10.0138	1.3614	0.0071601	0.030321	-//-
FBgn0263330	ncRNA(CR43411)	284.265	110.931	1.3576	8.51e-08	1.19e-06	-//-
FBgn0031273	CG2839 gene product from transcript CG2839-RA(CG2839)	919.068	359.843	1.3528	0.0041073	0.019021	sp|O46197|A29AB_DROME Accessory gland protein Acp29AB OS=Drosophila melanogaster OX=7227 GN=Acp29AB PE=2 SV=2//6.22272e-24
FBgn0034512	CG18067 gene product from transcript CG18067-RB(CG18067)	29690.4	11654.5	1.3491	1.22e-08	1.99e-07	-//-
FBgn0030157	CG1468 gene product from transcript CG1468-RA(CG1468)	2162.97	850.487	1.3466	9.41e-08	1.3e-06	-//-
FBgn0034647	poor Imd response upon knock-in(pirk)	101.987	40.3693	1.337	0.0022834	0.011563	-//-
FBgn0267910	mRNA-like ncRNA in embryogenesis 16(MRE16)	45212.1	17900.7	1.3367	8.96e-05	0.00067866	-//-
FBgn0053468	CG33468 gene product from transcript CG33468-RA(CG33468)	166.308	65.8757	1.336	1.35e-08	2.19e-07	-//-
FBgn0036466	CG18581 gene product from transcript CG18581-RA(CG18581)	33.2095	13.1574	1.3357	0.0021443	0.010945	-//-
FBgn0052625	CG32625 gene product from transcript CG32625-RA(CG32625)	65.9192	26.1577	1.3335	3.85e-05	0.00031715	sp|Q8SWX0|ASTRX_DROME Gametocyte-specific factor 1 homolog OS=Drosophila melanogaster OX=7227 GN=arx PE=1 SV=1//1.39969e-09
FBgn0039342	CG5107 gene product from transcript CG5107-RA(CG5107)	19524.7	7759.59	1.3312	0.0009429	0.0053464	-//-
FBgn0031489	CG17224 gene product from transcript CG17224-RC(CG17224)	3716.2	1478.14	1.33	4.99e-17	2.99e-15	sp|P52624|UPP1_MOUSE Uridine phosphorylase 1 OS=Mus musculus OX=10090 GN=Upp1 PE=1 SV=2//1.06143e-73
FBgn0038290	CG6912 gene product from transcript CG6912-RA(CG6912)	325.257	129.871	1.3245	3.36e-11	8e-10	-//-
FBgn0036945	Snakeskin(Ssk)	3682.24	1472.42	1.3224	4.93e-12	1.34e-10	sp|Q9VW87|SSK_DROME Protein snakeskin OS=Drosophila melanogaster OX=7227 GN=Ssk PE=1 SV=1//3.37801e-111
FBgn0267086	ncRNA(CR45530)	37.9687	15.2281	1.3181	0.0090209	0.036905	-//-
FBgn0023178	Pigment-dispersing factor(Pdf)	1528.14	612.911	1.318	5.05e-10	1.02e-08	sp|O96690|PDF_DROME Protein PDF OS=Drosophila melanogaster OX=7227 GN=Pdf PE=1 SV=2//2.401e-68
FBgn0261989	CG42807 gene product from transcript CG42807-RB(CG42807)	2443.3	980.814	1.3168	4.12e-06	4.24e-05	-//-
FBgn0265667	ncRNA(CR44474)	55.1306	22.158	1.315	0.00089787	0.0051188	-//-
FBgn0004629	Cystatin-like(Cys)	11606.2	4693.5	1.3062	0.00013846	0.0010034	sp|P23779|CYTL_DROME Cystatin-like protein OS=Drosophila melanogaster OX=7227 GN=Cys PE=2 SV=2//1.79608e-85
FBgn0039203	CG13618 gene product from transcript CG13618-RA(CG13618)	2900.31	1172.95	1.3061	8.35e-09	1.41e-07	sp|Q9VBV3|TAKT_DROME Protein takeout OS=Drosophila melanogaster OX=7227 GN=to PE=2 SV=1//1.65878e-27
FBgn0266275	ncRNA(CR44960)	44.743	18.1039	1.3054	0.00063811	0.0038177	sp|P08011|MGST1_RAT Microsomal glutathione S-transferase 1 OS=Rattus norvegicus OX=10116 GN=Mgst1 PE=1 SV=3//6.1937e-11
FBgn0261508	CG42656 gene product from transcript CG42656-RA(CG42656)	2480.88	1004.51	1.3044	2.42e-05	0.00020883	-//-
FBgn0000500	Drosulfakinin(Dsk)	1414.65	574.443	1.3002	2.48e-07	3.17e-06	sp|P09040|DSK_DROME Drosulfakinins OS=Drosophila melanogaster OX=7227 GN=Dsk PE=1 SV=2//1.15162e-99
FBgn0063368	Glycoprotein hormone beta 5 ortholog (H. sapiens)(Gpb5)	430.257	174.716	1.3002	2.93e-07	3.72e-06	sp|A0A0F7YZI5|CTHB5_CONVC Thyrostimulin beta-5 subunit OS=Conus victoriae OX=319920 PE=2 SV=1//3.30712e-16
FBgn0034199	Growth-blocking peptide(Gbp)	861.174	350.912	1.2952	9.29e-05	0.00070006	-//-
FBgn0267585	ncRNA(CR45923)	54.1247	22.0835	1.2933	0.00021553	0.0014771	-//-
FBgn0051606	CG31606 gene product from transcript CG31606-RB(CG31606)	38.3918	15.6833	1.2916	0.0013254	0.0072119	-//-
FBgn0267587	ncRNA(CR45925)	367.977	150.394	1.2909	1.14e-07	1.55e-06	-//-
FBgn0035868	CG7194 gene product from transcript CG7194-RA(CG7194)	116.599	47.6619	1.2906	0.00076304	0.0044579	sp|I3LM39|CGAS_PIG Cyclic GMP-AMP synthase OS=Sus scrofa OX=9823 GN=CGAS PE=1 SV=1//5.53171e-10
FBgn0035611	CG13285 gene product from transcript CG13285-RB(CG13285)	875.446	357.879	1.2905	2.59e-05	0.00022157	-//-
FBgn0016076	vrille(vri)	2258.44	923.934	1.2895	1.9e-15	8.55e-14	sp|O08750|NFIL3_MOUSE Nuclear factor interleukin-3-regulated protein OS=Mus musculus OX=10090 GN=Nfil3 PE=1 SV=1//6.6684e-19
FBgn0259716	CG42370 gene product from transcript CG42370-RA(CG42370)	429.597	176.189	1.2859	1.04e-11	2.68e-10	sp|Q8T062|NEP4_DROME Neprilysin-4 OS=Drosophila melanogaster OX=7227 GN=Nep4 PE=1 SV=1//9.79507e-21
FBgn0002856	Accessory gland protein 26Ab(Acp26Ab)	13007.7	5339.79	1.2845	1.37e-05	0.00012598	sp|P10334|MS2B_DROME Accessory gland-specific peptide 26Ab OS=Drosophila melanogaster OX=7227 GN=Acp26Ab PE=2 SV=1//9.36363e-51
FBgn0036380	CG8757 gene product from transcript CG8757-RB(CG8757)	34.3321	14.1096	1.2829	0.0070509	0.029954	sp|D2WKD9|SDR1_AEDAE Farnesol dehydrogenase OS=Aedes aegypti OX=7159 GN=SDR-1 PE=1 SV=2//1.34617e-68
FBgn0033742	CG8550 gene product from transcript CG8550-RA(CG8550)	200.154	82.2949	1.2822	8.68e-09	1.46e-07	sp|Q18673|NEPL1_CAEEL Neprilysin-1 OS=Caenorhabditis elegans OX=6239 GN=nep-1 PE=1 SV=3//6.92536e-16
FBgn0031561	Immune induced molecule 33(IM33)	24932.8	10255.7	1.2816	6.11e-09	1.05e-07	sp|P11424|IMAP_DROFU Male accessory gland serine protease inhibitor OS=Drosophila funebris OX=7221 GN=PapD PE=1 SV=1//9.62187e-16
FBgn0264296	CG43774 gene product from transcript CG43774-RA(CG43774)	1792.66	737.996	1.2804	3.24e-06	3.41e-05	-//-
FBgn0034538	CG16799 gene product from transcript CG16799-RB(CG16799)	2084.93	858.567	1.28	2.11e-13	6.8e-12	sp|Q17005|LYSC1_ANOGA Lysozyme c-1 OS=Anopheles gambiae OX=7165 GN=AGAP007347 PE=2 SV=2//7.83724e-28
FBgn0038958	CG13857 gene product from transcript CG13857-RA(CG13857)	102.173	42.0956	1.2793	0.00012222	0.00089623	-//-
FBgn0040653	Immune induced molecule 4(IM4)	5518.12	2276.78	1.2772	4.92e-08	7.15e-07	sp|P82705|IM04_DROME Immune-induced peptide 4 OS=Drosophila melanogaster OX=7227 GN=IM4 PE=1 SV=2//1.10434e-07
FBgn0039650	Metazoan SpoT homolog-1(Mesh1)	93.4798	38.6103	1.2757	0.0017771	0.009277	sp|Q9VAM9|MESH1_DROME Guanosine-3&apos;,5&apos;-bis(diphosphate) 3&apos;-pyrophosphohydrolase MESH1 OS=Drosophila melanogaster OX=7227 GN=Mesh1 PE=1 SV=1//1.63956e-130
FBgn0051076	CG31076 gene product from transcript CG31076-RB(CG31076)	278.673	115.289	1.2733	2e-05	0.00017589	sp|Q9D9B4|LRMDA_MOUSE Leucine-rich melanocyte differentiation-associated protein OS=Mus musculus OX=10090 GN=Lrmda PE=1 SV=1//3.21464e-17
FBgn0040794	CG13056 gene product from transcript CG13056-RA(CG13056)	62.9078	26.0289	1.2731	0.00011003	0.00081542	-//-
FBgn0050026	CG30026 gene product from transcript CG30026-RB(CG30026)	302.037	125.006	1.2727	3.1e-10	6.42e-09	-//-
FBgn0036833	CG3819 gene product from transcript CG3819-RB(CG3819)	790.283	327.136	1.2725	2.53e-11	6.13e-10	-//-
FBgn0261386	Glycoprotein hormone alpha 2 ortholog (H. sapiens)(Gpa2)	95.4127	39.5354	1.271	6.71e-06	6.59e-05	sp|A0A0F7Z3J2|CTHA2_CONVC Thyrostimulin alpha-2 subunit OS=Conus victoriae OX=319920 PE=1 SV=1//3.01415e-29
FBgn0053460	CG33460 gene product from transcript CG33460-RA(CG33460)	79.0682	32.8096	1.269	0.00015053	0.001083	sp|P25155|FA10_CHICK Coagulation factor X OS=Gallus gallus OX=9031 GN=F10 PE=1 SV=1//6.07457e-16
FBgn0010038	Glutathione S transferase D2(GstD2)	97.7507	40.605	1.2674	5.17e-06	5.2e-05	sp|Q9VG98|GSTD2_DROME Glutathione S-transferase D2 OS=Drosophila melanogaster OX=7227 GN=GstD2 PE=1 SV=1//4.99917e-158
FBgn0036467	CG12310 gene product from transcript CG12310-RA(CG12310)	940.551	390.885	1.2668	7.97e-10	1.56e-08	-//-
FBgn0040907	mitochondrial ribosomal protein L33(mRpL33)	503.447	209.65	1.2639	1.02e-06	1.18e-05	sp|Q9W4L1|RM33_DROME 39S ribosomal protein L33, mitochondrial OS=Drosophila melanogaster OX=7227 GN=mRpL33 PE=3 SV=2//3.06313e-38
FBgn0266197	ncRNA(CR44892)	46.8217	19.5414	1.2606	0.0096687	0.039126	-//-
FBgn0040928	pseudo(CR15345)	125.611	52.6143	1.2554	8.84e-07	1.03e-05	-//-
FBgn0032002	CG8353 gene product from transcript CG8353-RB(CG8353)	285.533	119.776	1.2533	7.71e-10	1.52e-08	sp|P19079|CDD_BACSU Cytidine deaminase OS=Bacillus subtilis (strain 168) OX=224308 GN=cdd PE=1 SV=1//2.36753e-27
FBgn0033928	CG13941 gene product from transcript CG13941-RA(Arc2)	388.257	163.142	1.2509	8.49e-11	1.9e-09	sp|Q7JV70|ARC2_DROME Activity-regulated cytoskeleton associated protein 2 OS=Drosophila melanogaster OX=7227 GN=Arc2 PE=2 SV=1//2.87515e-140
FBgn0085358	Diedel 3(Diedel3)	3227.01	1356.69	1.2501	0.0041794	0.019294	sp|Q9VAK8|DIE_DROME Protein Diedel OS=Drosophila melanogaster OX=7227 GN=Diedel PE=1 SV=1//1.3184e-15
FBgn0015316	Trypsin 29F(Try29F)	267.937	112.643	1.2501	1.74e-07	2.3e-06	sp|P35035|TRY1_ANOGA Trypsin-1 OS=Anopheles gambiae OX=7165 GN=TRYP1 PE=2 SV=3//5.45005e-89
FBgn0035541	CG15019 gene product from transcript CG15019-RB(CG15019)	1246.97	524.642	1.249	6.05e-08	8.68e-07	-//-
FBgn0264748	CG44006 gene product from transcript CG44006-RA(CG44006)	430.431	181.334	1.2471	3.94e-11	9.26e-10	-//-
FBgn0038243	CG8066 gene product from transcript CG8066-RA(CG8066)	2154.46	909.817	1.2437	4.64e-06	4.71e-05	sp|P23779|CYTL_DROME Cystatin-like protein OS=Drosophila melanogaster OX=7227 GN=Cys PE=2 SV=2//3.05899e-48
FBgn0033697	CG8457 gene product from transcript CG8457-RA(Cyp6t3)	50.954	21.5846	1.2392	0.00047396	0.0029496	sp|Q9V676|CP6T3_DROME Probable cytochrome P450 6t3 OS=Drosophila melanogaster OX=7227 GN=Cyp6t3 PE=3 SV=1//0
FBgn0052068	Acireductone dioxygenase 1(Adi1)	4477.36	1900.59	1.2362	2.96e-05	0.00025029	sp|Q6AWN0|MTND_DROME 1,2-dihydroxy-3-keto-5-methylthiopentene dioxygenase OS=Drosophila melanogaster OX=7227 GN=Adi1 PE=2 SV=2//1.17653e-137
FBgn0264863	ncRNA(CR44054)	680.514	289.841	1.2314	0.0022216	0.011285	-//-
FBgn0267525	ncRNA(CR45865)	33.3182	14.2082	1.2296	0.0041146	0.019038	sp|O77286|U239_DROME Protein anon-73B1 OS=Drosophila melanogaster OX=7227 GN=anon-73B1 PE=3 SV=1//1.9704e-46
FBgn0265979	ncRNA(CR44758)	54.9739	23.4479	1.2293	0.00037198	0.0023919	-//-
FBgn0262150	CG42876 gene product from transcript CG42876-RB(CG42876)	134.634	57.6916	1.2226	0.00042804	0.0027047	-//-
FBgn0038506	CG5860 gene product from transcript CG5860-RA(CG5860)	299.52	128.67	1.219	0.00010153	0.00075907	sp|Q4LAL9|CATD_CANLF Cathepsin D OS=Canis lupus familiaris OX=9615 GN=CTSD PE=2 SV=1//6.38793e-68
FBgn0262142	ncRNA(CR42868)	141.52	61.373	1.2053	0.00053065	0.0032493	-//-
FBgn0046999	CG6429 gene product from transcript CG6429-RA(CG6429)	693.759	301.787	1.2009	4.22e-09	7.43e-08	sp|Q1XG90|LYS2_CRAVI Lysozyme 2 OS=Crassostrea virginica OX=6565 GN=lysoz2 PE=1 SV=1//3.11848e-08
FBgn0005670	Cytochrome P450-4d1(Cyp4d1)	255.593	111.249	1.2001	8.92e-09	1.49e-07	sp|P33269|CP4D1_DROME Cytochrome P450 4d1 OS=Drosophila melanogaster OX=7227 GN=Cyp4d1 PE=2 SV=2//0
FBgn0263415	ncRNA(CR43461)	161.152	70.1602	1.1997	1.63e-06	1.82e-05	-//-
FBgn0031957	TweedleE(TwdlE)	32.0433	13.9537	1.1994	0.0056069	0.024642	-//-
FBgn0033388	CG8046 gene product from transcript CG8046-RB(CG8046)	34.222	14.9193	1.1977	0.0042222	0.019444	-//-
FBgn0038455	CG14907 gene product from transcript CG14907-RA(CG14907)	300.561	131.305	1.1947	3.64e-09	6.5e-08	-//-
FBgn0053217	CG33217 gene product from transcript CG33217-RA(CG33217)	364.755	159.653	1.192	8.35e-10	1.63e-08	-//-
FBgn0264916	ncRNA(CR44107)	123.835	54.2331	1.1912	0.00063221	0.0037902	-//-
FBgn0036145	CG7607 gene product from transcript CG7607-RA(CG7607)	912.633	400.669	1.1876	1.33e-06	1.51e-05	sp|Q5WRU0|OIG4_CAEEL Immunoglobulin domain-containing protein oig-4 OS=Caenorhabditis elegans OX=6239 GN=oig-4 PE=1 SV=1//4.61505e-21
FBgn0259748	CG42397 gene product from transcript CG42397-RA(CG42397)	2979.58	1308.4	1.1873	1.12e-05	0.00010493	sp|O76217|PE1_ANOGA Peritrophin-1 OS=Anopheles gambiae OX=7165 GN=Aper1 PE=2 SV=2//8.19323e-08
FBgn0264775	CG44013 gene product from transcript CG44013-RC(CG44013)	231.44	101.681	1.1866	5.13e-07	6.23e-06	-//-
FBgn0263089	ncRNA(CR43357)	373.66	164.257	1.1858	0.0002081	0.0014324	-//-
FBgn0263586	ncRNA(CR43611)	174.989	77.295	1.1788	0.0013551	0.0073416	-//-
FBgn0036203	Mucin 68D(Muc68D)	7283.4	3221.72	1.1768	0.010948	0.043361	sp|Q9W5U2|CHI10_DROME Probable chitinase 10 OS=Drosophila melanogaster OX=7227 GN=Cht10 PE=2 SV=2//3.95558e-07
FBgn0264958	ncRNA(CR44127)	148.367	65.6306	1.1767	0.0025532	0.0127	-//-
FBgn0032669	CG15155 gene product from transcript CG15155-RA(CG15155)	2378.51	1054.38	1.1737	6.72e-07	8e-06	-//-
FBgn0263083	CG43351 gene product from transcript CG43351-RA(CG43351)	794.129	352.28	1.1727	4.74e-07	5.79e-06	-//-
FBgn0036831	CG6839 gene product from transcript CG6839-RA(CG6839)	155.203	68.8556	1.1725	5.82e-06	5.79e-05	-//-
FBgn0029990	CG2233 gene product from transcript CG2233-RA(CG2233)	34594	15351.3	1.1722	2.79e-14	1.04e-12	-//-
FBgn0040968	CG14933 gene product from transcript CG14933-RC(CG14933)	65.3945	29.0536	1.1705	0.00021811	0.0014929	-//-
FBgn0000477	Deoxyribonuclease II(DNaseII)	2330.32	1039.08	1.1652	1.71e-06	1.89e-05	sp|Q17778|NUC1_CAEEL Deoxyribonuclease-2 OS=Caenorhabditis elegans OX=6239 GN=nuc-1 PE=3 SV=1//6.7266e-55
FBgn0032670	CG5783 gene product from transcript CG5783-RA(CG5783)	227.273	101.364	1.1649	1.8e-06	1.99e-05	-//-
FBgn0262895	ncRNA(CR43250)	109.108	48.7421	1.1625	1.04e-05	9.85e-05	-//-
FBgn0083124	ncRNA(Uhg4)	967.971	432.665	1.1617	7e-12	1.86e-10	-//-
FBgn0035806	CG7496 gene product from transcript CG7496-RA(PGRP-SD)	515.047	230.306	1.1611	8.39e-08	1.18e-06	sp|Q9VS97|PGPSD_DROME Peptidoglycan-recognition protein SD OS=Drosophila melanogaster OX=7227 GN=PGRP-SD PE=1 SV=1//6.43425e-136
FBgn0261016	closca(clos)	1630.39	731.1	1.1571	0.0011697	0.0064597	-//-
FBgn0051704	CG31704 gene product from transcript CG31704-RB(CG31704)	7151.98	3213.78	1.1541	9.07e-05	0.00068563	sp|P09656|ISK1L_RAT Serine protease inhibitor Kazal-type 1-like OS=Rattus norvegicus OX=10116 GN=Spink1l PE=1 SV=2//1.75492e-06
FBgn0266866	ncRNA(CR45327)	31.7094	14.2492	1.154	0.0078114	0.03259	-//-
FBgn0261631	CG42714 gene product from transcript CG42714-RA(CG42714)	992.524	446.08	1.1538	6.97e-05	0.00054299	-//-
FBgn0028526	CG15293 gene product from transcript CG15293-RC(CG15293)	6825.71	3068.45	1.1535	9.76e-09	1.62e-07	-//-
FBgn0050163	Cuticular protein 60D(Cpr60D)	220.822	99.3902	1.1517	6.86e-05	0.00053549	sp|P27779|CUP7_DROME Pupal cuticle protein Edg-78E OS=Drosophila melanogaster OX=7227 GN=Edg78E PE=2 SV=1//8.4494e-11
FBgn0027109	neuropeptide F(NPF)	321.525	144.921	1.1497	6.26e-09	1.07e-07	sp|Q9VET0|NPF_DROME Neuropeptide F OS=Drosophila melanogaster OX=7227 GN=NPF PE=1 SV=1//5.57897e-58
FBgn0262580	CG43120 gene product from transcript CG43120-RA(CG43120)	1321.72	595.803	1.1495	3.95e-05	0.00032435	sp|P28575|IPP_MOUSE Actin-binding protein IPP OS=Mus musculus OX=10090 GN=Ipp PE=2 SV=3//1.8258e-06
FBgn0267265	ncRNA(CR45701)	103.945	46.905	1.148	1.73e-05	0.00015419	-//-
FBgn0036262	CG6910 gene product from transcript CG6910-RC(CG6910)	12963.6	5854.92	1.1467	3.13e-06	3.31e-05	sp|Q9QXN5|MIOX_MOUSE Inositol oxygenase OS=Mus musculus OX=10090 GN=Miox PE=1 SV=2//7.3722e-101
FBgn0028697	Ribosomal protein L15(RpL15)	54985.4	24837.5	1.1465	7.89e-10	1.55e-08	sp|O17445|RL15_DROME 60S ribosomal protein L15 OS=Drosophila melanogaster OX=7227 GN=RpL15 PE=1 SV=1//6.52178e-121
FBgn0033756	CG17760 gene product from transcript CG17760-RB(CG17760)	88.7592	40.1356	1.145	5.44e-05	0.00043297	sp|P23625|GNAQ_DROME G protein alpha q subunit OS=Drosophila melanogaster OX=7227 GN=Galphaq PE=2 SV=2//2.63552e-167
FBgn0085482	CG34453 gene product from transcript CG34453-RB(CG34453)	31.6586	14.3237	1.1442	0.0078036	0.032573	-//-
FBgn0266843	ncRNA(CR45305)	619.428	282.504	1.1327	0.0011101	0.0061688	-//-
FBgn0036667	CG9669 gene product from transcript CG9669-RB(CG9669)	469.508	214.172	1.1324	0.0010818	0.0060429	sp|Q9VVA8|TM258_DROME Transmembrane protein 258 homolog OS=Drosophila melanogaster OX=7227 GN=CG9669 PE=3 SV=1//2.37113e-35
FBgn0034126	CG4398 gene product from transcript CG4398-RA(CG4398)	415.813	190.03	1.1297	4.76e-06	4.83e-05	-//-
FBgn0040733	CG15068 gene product from transcript CG15068-RA(CG15068)	6041.11	2761.04	1.1296	0.00045409	0.002848	sp|Q9V8G0|IM03_DROME Immune-induced peptide 3 OS=Drosophila melanogaster OX=7227 GN=IM3 PE=1 SV=1//9.87689e-06
FBgn0263611	ncRNA(CR43620)	132.494	60.5633	1.1294	0.00059643	0.0036026	-//-
FBgn0039761	CG18404 gene product from transcript CG18404-RA(CG18404)	6184.72	2827.66	1.1291	4.88e-07	5.94e-06	-//-
FBgn0046876	Odorant-binding protein 83ef(Obp83ef)	134.371	61.6034	1.1251	4.77e-06	4.83e-05	-//-
FBgn0053099	CG33099 gene product from transcript CG33099-RA(CG33099)	555.679	254.784	1.125	3.96e-10	8.1e-09	sp|Q7LL04|YQK1_SCHPO UPF0676 protein C1494.01 OS=Schizosaccharomyces pombe (strain 972 / ATCC 24843) OX=284812 GN=SPCC1494.01 PE=3 SV=2//2.59759e-25
FBgn0051955	CG31955 gene product from transcript CG31955-RC(CG31955)	482.419	221.474	1.1231	0.00027881	0.0018591	-//-
FBgn0085483	CG34454 gene product from transcript CG34454-RA(CG34454)	418.252	192.023	1.1231	2.61e-09	4.78e-08	-//-
FBgn0051997	CG31997 gene product from transcript CG31997-RB(CG31997)	2242.38	1029.57	1.123	2.3e-05	0.00020015	-//-
FBgn0050403	CG30403 gene product from transcript CG30403-RB(CG30403)	32.5267	14.9381	1.1226	0.0079483	0.033023	-//-
FBgn0040551	CG11686 gene product from transcript CG11686-RB(CG11686)	1285.1	590.595	1.1216	2.97e-07	3.76e-06	-//-
FBgn0262003	CG42821 gene product from transcript CG42821-RA(CG42821)	336.159	154.516	1.1214	1.85e-07	2.44e-06	-//-
FBgn0003068	period(per)	511.452	235.331	1.1199	8.29e-10	1.62e-08	sp|P07663|PER_DROME Period circadian protein OS=Drosophila melanogaster OX=7227 GN=per PE=1 SV=2//0
FBgn0038930	CG5778 gene product from transcript CG5778-RA(CG5778)	4577.11	2107.87	1.1187	0.001626	0.0085862	-//-
FBgn0265344	ncRNA(CR44298)	50.9526	23.5365	1.1143	0.0014435	0.0077632	-//-
FBgn0013685	NADH dehydrogenase subunit 6(ND6)	50.3674	23.292	1.1127	0.001505	0.0080614	sp|P18933|NU6M_DROME NADH-ubiquinone oxidoreductase chain 6 OS=Drosophila melanogaster OX=7227 GN=mt:ND6 PE=3 SV=1//2.77028e-34
FBgn0053325	CG33325 gene product from transcript CG33325-RB(CG33325)	238.48	110.313	1.1123	0.00083102	0.0047836	-//-
FBgn0052641	CG32641 gene product from transcript CG32641-RA(CG32641)	65.7654	30.4408	1.1113	0.00046077	0.0028842	sp|Q56237|DNAJ2_THET8 Chaperone protein DnaJ 2 OS=Thermus thermophilus (strain HB8 / ATCC 27634 / DSM 579) OX=300852 GN=dnaJ2 PE=3 SV=2//1.05245e-18
FBgn0032634	CG6840 gene product from transcript CG6840-RA(Rpb11)	471.062	218.413	1.1089	0.0044827	0.020433	sp|Q9VJE4|RPB11_DROME DNA-directed RNA polymerase II subunit RPB11 OS=Drosophila melanogaster OX=7227 GN=Rpb11 PE=3 SV=1//5.8162e-80
FBgn0259936	ncRNA(Uhg3)	417.921	194.355	1.1045	4.16e-09	7.34e-08	-//-
FBgn0031580	CG15423 gene product from transcript CG15423-RA(CG15423)	1436.66	669.09	1.1024	7.96e-05	0.00060879	-//-
FBgn0267752	ncRNA(CR46083)	75.1102	35.1261	1.0965	0.00026344	0.0017692	-//-
FBgn0263852	lethal (2) k12914(l(2)k12914)	993.887	465.252	1.0951	0.00040416	0.0025649	sp|Q9VLM5|DAD1_DROME Dolichyl-diphosphooligosaccharide--protein glycosyltransferase subunit DAD1 OS=Drosophila melanogaster OX=7227 GN=l(2)k12914 PE=3 SV=1//3.18687e-64
FBgn0262814	CG43185 gene product from transcript CG43185-RD(CG43185)	960.404	449.611	1.095	0.0060999	0.026439	-//-
FBgn0027934	pseudo(alpha-Est4aPsi)	45.4217	21.2718	1.0944	0.0076367	0.03196	sp|P16854|EST1_CULPI Esterase B1 OS=Culex pipiens OX=7175 GN=B1 PE=3 SV=1//5.05556e-46
FBgn0260798	G protein-coupled receptor kinase 1(Gprk1)	1963.09	919.506	1.0942	1.07e-09	2.05e-08	sp|P32865|GPRK1_DROME G protein-coupled receptor kinase 1 OS=Drosophila melanogaster OX=7227 GN=Gprk1 PE=2 SV=2//0
FBgn0035227	Increased minichromosome loss 1(Iml1)	4598.31	2157.14	1.092	3.03e-12	8.49e-11	sp|O75140|DEPD5_HUMAN GATOR complex protein DEPDC5 OS=Homo sapiens OX=9606 GN=DEPDC5 PE=1 SV=2//3.9509e-43
FBgn0263761	CG43678 gene product from transcript CG43678-RA(CG43678)	163.264	76.6026	1.0917	0.00040979	0.0025965	-//-
FBgn0263606	Heat shock protein cognate 20(Hsc20)	185.417	87.0602	1.0907	0.001139	0.0063052	sp|Q8K3A0|HSC20_MOUSE Iron-sulfur cluster co-chaperone protein HscB, mitochondrial OS=Mus musculus OX=10090 GN=Hscb PE=1 SV=2//1.08622e-30
FBgn0085313	CG34284 gene product from transcript CG34284-RA(CG34284)	1689.25	793.235	1.0906	2.32e-11	5.65e-10	-//-
FBgn0040099	CG7106 gene product from transcript CG7106-RC(lectin-28C)	4849.25	2276.98	1.0906	2.23e-07	2.88e-06	sp|Q9U968|A29AB_DROSI Accessory gland protein Acp29AB OS=Drosophila simulans OX=7240 GN=Acp29AB PE=3 SV=1//1.89062e-17
FBgn0265677	ncRNA(CR44484)	57.3809	26.9434	1.0906	0.0021776	0.011104	-//-
FBgn0015035	Cytochrome P450-4e3(Cyp4e3)	874.378	411.344	1.0879	1.69e-10	3.63e-09	sp|Q9VL92|CP4E3_DROME Cytochrome P450 4e3 OS=Drosophila melanogaster OX=7227 GN=Cyp4e3 PE=2 SV=1//0
FBgn0038956	CG5379 gene product from transcript CG5379-RB(CG5379)	175.567	82.6133	1.0876	0.0064934	0.027866	sp|Q99N23|CAH15_MOUSE Carbonic anhydrase 15 OS=Mus musculus OX=10090 GN=Ca15 PE=1 SV=1//9.67937e-38
FBgn0054033	CG34033 gene product from transcript CG34033-RA(CG34033)	1886.49	887.856	1.0873	0.003347	0.016013	-//-
FBgn0262022	CG42833 gene product from transcript CG42833-RA(CG42833)	1490.66	702.812	1.0847	0.00074965	0.0043973	-//-
FBgn0038903	CG13418 gene product from transcript CG13418-RA(RpI12)	91.1965	43.0565	1.0827	0.0027856	0.013674	sp|Q6MFY5|RPA12_RAT DNA-directed RNA polymerase I subunit RPA12 OS=Rattus norvegicus OX=10116 GN=Znrd1 PE=3 SV=1//1.17693e-23
FBgn0051453	CG31453 gene product from transcript CG31453-RB(pch2)	205.791	97.1672	1.0826	1.04e-05	9.85e-05	sp|E1C6Q1|PCH2_CHICK Pachytene checkpoint protein 2 homolog OS=Gallus gallus OX=9031 GN=TRIP13 PE=3 SV=1//1.71858e-99
FBgn0267614	ncRNA(CR45952)	191.622	90.5704	1.0812	0.00012433	0.00090959	sp|O18391|KRAK_DROME Probable serine hydrolase OS=Drosophila melanogaster OX=7227 GN=kraken PE=2 SV=1//1.90401e-57
FBgn0036323	CG14118 gene product from transcript CG14118-RA(CG14118)	75.2777	35.5887	1.0808	0.00027933	0.0018611	-//-
FBgn0033019	CG10395 gene product from transcript CG10395-RE(CG10395)	247.647	117.171	1.0797	2.29e-07	2.96e-06	sp|Q99PT3|IN80B_MOUSE INO80 complex subunit B OS=Mus musculus OX=10090 GN=Ino80b PE=1 SV=2//9.1943e-15
FBgn0031888	PDGF- and VEGF-related factor 2(Pvf2)	125.628	59.5138	1.0779	1.44e-05	0.0001317	-//-
FBgn0034276	Sarcosine dehydrogenase(Sardh)	231.618	109.771	1.0773	3.27e-07	4.12e-06	sp|Q99LB7|SARDH_MOUSE Sarcosine dehydrogenase, mitochondrial OS=Mus musculus OX=10090 GN=Sardh PE=1 SV=1//0
FBgn0044872	CG40305 gene product from transcript CG40305-RB(FucTC)	37.0303	17.5547	1.0769	0.0071944	0.030434	sp|P83088|FUCTC_DROME Alpha-(1,3)-fucosyltransferase C OS=Drosophila melanogaster OX=7227 GN=FucTC PE=2 SV=4//0
FBgn0265851	ncRNA(CR44640)	71.4421	33.9323	1.0741	0.001957	0.010072	-//-
FBgn0039299	CG11854 gene product from transcript CG11854-RB(CG11854)	721.842	343.52	1.0713	0.0027348	0.013457	sp|Q9VBV3|TAKT_DROME Protein takeout OS=Drosophila melanogaster OX=7227 GN=to PE=2 SV=1//1.53122e-33
FBgn0263049	let-7-Complex(let-7-C)	109.747	52.2343	1.0711	4.52e-05	0.00036522	-//-
FBgn0265346	ncRNA(CR44300)	162.354	77.286	1.0709	1.61e-05	0.00014502	-//-
FBgn0050295	CG30295 gene product from transcript CG30295-RB(Ipk1)	244.085	116.289	1.0697	3.43e-07	4.3e-06	sp|Q9W2Q7|IPPK_DROME Inositol-pentakisphosphate 2-kinase OS=Drosophila melanogaster OX=7227 GN=Ipk1 PE=2 SV=2//0
FBgn0010041	Glutathione S transferase D5(GstD5)	81.9133	39.0761	1.0678	0.00022324	0.0015222	sp|Q9VG95|GSTD5_DROME Glutathione S-transferase D5 OS=Drosophila melanogaster OX=7227 GN=GstD5 PE=1 SV=2//7.66883e-153
FBgn0034140	Limostatin(Lst)	4851.52	2315.61	1.067	8.84e-12	2.3e-10	-//-
FBgn0040687	CG14645 gene product from transcript CG14645-RA(CG14645)	77369.9	37055.5	1.0621	4.52e-05	0.00036522	-//-
FBgn0063493	Glutathione S transferase E7(GstE7)	1590.27	762.064	1.0613	4.86e-06	4.91e-05	sp|P46430|GSTT1_MANSE Glutathione S-transferase 1 OS=Manduca sexta OX=7130 GN=GST1 PE=2 SV=1//6.86252e-58
FBgn0030051	Serine Protease Immune Response Integrator(spirit)	399.21	191.631	1.0588	1.84e-08	2.9e-07	sp|P05049|SNAK_DROME Serine protease snake OS=Drosophila melanogaster OX=7227 GN=snk PE=1 SV=2//1.90257e-57
FBgn0259938	clockwork orange(cwo)	2227.6	1070.76	1.0569	5.24e-11	1.2e-09	sp|Q9VGZ5|CWO_DROME Transcription factor cwo OS=Drosophila melanogaster OX=7227 GN=cwo PE=1 SV=2//0
FBgn0038071	Dpp target gene(Dtg)	44.8418	21.5544	1.0569	0.0037783	0.017743	-//-
FBgn0031453	Bacchus(Bacc)	15792.4	7593.96	1.0563	1.06e-06	1.22e-05	-//-
FBgn0263408	ncRNA(CR43454)	41.4019	19.9188	1.0556	0.0054618	0.024123	-//-
FBgn0037696	Glutathione S transferase Z1(GstZ1)	209.9	100.998	1.0554	1.77e-05	0.00015737	sp|Q9VHD3|MAAI1_DROME Probable maleylacetoacetate isomerase 1 OS=Drosophila melanogaster OX=7227 GN=GstZ1 PE=1 SV=1//0
FBgn0040005	CG17883 gene product from transcript CG17883-RB(CG17883)	3111.94	1498.01	1.0548	2.2e-07	2.84e-06	sp|Q9D9I4|TBC20_MOUSE TBC1 domain family member 20 OS=Mus musculus OX=10090 GN=Tbc1d20 PE=1 SV=1//1.26034e-70
FBgn0083027	ncRNA(snoRNA:Psi18S-531)	57.9881	27.9989	1.0504	0.00157	0.0083479	-//-
FBgn0259740	CG42394 gene product from transcript CG42394-RC(CG42394)	1663.03	803.011	1.0503	3.33e-07	4.19e-06	-//-
FBgn0263762	CG43679 gene product from transcript CG43679-RA(CG43679)	12861.7	6218.9	1.0483	9.94e-06	9.46e-05	-//-
FBgn0266982	ncRNA(CR45433)	46.6485	22.5642	1.0478	0.0035888	0.017013	-//-
FBgn0033821	CG10799 gene product from transcript CG10799-RA(CG10799)	2862.27	1384.7	1.0476	8.04e-07	9.47e-06	-//-
FBgn0050380	CG30380 gene product from transcript CG30380-RA(CG30380)	71.3445	34.5519	1.046	0.0011926	0.0065677	-//-
FBgn0037620	CG9793 gene product from transcript CG9793-RA(ranshi)	124.361	60.2278	1.046	3.52e-05	0.00029247	sp|Q9VHM6|OUIB_DROME Transcription factor Ouib OS=Drosophila melanogaster OX=7227 GN=Ouib PE=2 SV=2//1.51971e-62
FBgn0033775	CG17577 gene product from transcript CG17577-RA(Cyp9h1)	433.889	210.507	1.0435	1.81e-08	2.85e-07	sp|Q9V6H1|CP9H1_DROME Probable cytochrome P450 9h1 OS=Drosophila melanogaster OX=7227 GN=Cyp9h1 PE=3 SV=1//0
FBgn0037560	pseudo(CR18228)	1149.69	557.891	1.0432	1.36e-08	2.2e-07	sp|Q24492|RFA1_DROME Replication protein A 70 kDa DNA-binding subunit OS=Drosophila melanogaster OX=7227 GN=RpA-70 PE=1 SV=1//9.47612e-35
FBgn0054003	Nimrod B3(NimB3)	310.214	150.664	1.0419	4.76e-06	4.83e-05	-//-
FBgn0028663	Vacuolar H[+] ATPase M9.7 subunit b(VhaM9.7-b)	6469.85	3145.4	1.0405	4.77e-06	4.83e-05	sp|Q20591|VA0E_CAEEL V-type proton ATPase subunit e OS=Caenorhabditis elegans OX=6239 GN=vha-17 PE=3 SV=2//6.33419e-13
FBgn0052350	Vacuolar protein sorting 11(Vps11)	853.362	415.976	1.0367	1.26e-09	2.4e-08	sp|Q9SJ40|VPS11_ARATH Vacuolar protein-sorting-associated protein 11 homolog OS=Arabidopsis thaliana OX=3702 GN=VPS11 PE=1 SV=1//8.75209e-28
FBgn0034290	CG5773 gene product from transcript CG5773-RC(CG5773)	1870.83	912.173	1.0363	0.0010861	0.0060584	-//-
FBgn0263445	ncRNA(CR43468)	42.6341	20.7937	1.0359	0.0058295	0.02548	sp|Q7Z429|LFG1_HUMAN Protein lifeguard 1 OS=Homo sapiens OX=9606 GN=GRINA PE=2 SV=1//7.61367e-44
FBgn0065032	Actin-related protein 2/3 complex, subunit 3B(Arpc3B)	540.644	263.827	1.0351	2.27e-08	3.51e-07	sp|Q9JM76|ARPC3_MOUSE Actin-related protein 2/3 complex subunit 3 OS=Mus musculus OX=10090 GN=Arpc3 PE=1 SV=3//1.18237e-73
FBgn0035331	Myosuppressin receptor 1(MsR1)	270.534	132.172	1.0334	3.52e-07	4.39e-06	sp|Q8SWR3|SPR_DROME Sex peptide receptor OS=Drosophila melanogaster OX=7227 GN=SPR PE=1 SV=1//7.98292e-08
FBgn0031559	CG3513 gene product from transcript CG3513-RA(CG3513)	94.5418	46.1994	1.0331	0.0036973	0.017429	sp|I2G9B4|VKT_MACLN Kunitz-type serine protease inhibitor PIVL OS=Macrovipera lebetina transmediterranea OX=384075 PE=1 SV=1//2.56072e-12
FBgn0015570	alpha-Esterase-2(alpha-Est2)	938.59	459.04	1.0319	8.74e-10	1.7e-08	sp|P16854|EST1_CULPI Esterase B1 OS=Culex pipiens OX=7175 GN=B1 PE=3 SV=1//7.35861e-120
FBgn0262987	CG43295 gene product from transcript CG43295-RA(CG43295)	35.2552	17.2458	1.0316	0.010807	0.042899	sp|Q32PP1|MRNIP_DANRE MRN complex-interacting protein OS=Danio rerio OX=7955 GN=mrnip PE=2 SV=1//3.2003e-17
FBgn0036581	Mediator complex subunit 10(MED10)	759.91	372.706	1.0278	2.44e-05	0.00021044	sp|Q9GYU7|MED10_DROME Mediator of RNA polymerase II transcription subunit 10 OS=Drosophila melanogaster OX=7227 GN=MED10 PE=1 SV=1//5.23469e-91
FBgn0050049	CG30049 gene product from transcript CG30049-RA(CG30049)	73.6705	36.1843	1.0257	0.010947	0.043361	sp|Q3UVK0|ERMP1_MOUSE Endoplasmic reticulum metallopeptidase 1 OS=Mus musculus OX=10090 GN=Ermp1 PE=1 SV=2//2.614e-119
FBgn0031538	CG3246 gene product from transcript CG3246-RA(CG3246)	2099.18	1031.05	1.0257	1.34e-10	2.92e-09	-//-
FBgn0029148	CG5258 gene product from transcript CG5258-RB(NHP2)	676.026	332.056	1.0257	3.11e-08	4.69e-07	sp|Q9V3U2|NHP2_DROME H/ACA ribonucleoprotein complex subunit 2-like protein OS=Drosophila melanogaster OX=7227 GN=NHP2 PE=1 SV=1//6.44896e-98
FBgn0266738	ncRNA(CR45211)	114.73	56.3932	1.0247	9.1e-05	0.00068801	-//-
FBgn0263029	CG43324 gene product from transcript CG43324-RA(CG43324)	673.063	330.861	1.0245	5.13e-07	6.23e-06	sp|P38040|GBG1_DROME Guanine nucleotide-binding protein subunit gamma-1 OS=Drosophila melanogaster OX=7227 GN=Ggamma1 PE=2 SV=1//1.59768e-22
FBgn0263997	CG43740 gene product from transcript CG43740-RA(CG43740)	192.24	94.597	1.023	4.47e-06	4.56e-05	-//-
FBgn0033936	CG17386 gene product from transcript CG17386-RB(CG17386)	253.15	124.612	1.0225	7.74e-07	9.14e-06	sp|Q8BN59|LARP6_MOUSE La-related protein 6 OS=Mus musculus OX=10090 GN=Larp6 PE=1 SV=1//4.64182e-37
FBgn0036320	CG10943 gene product from transcript CG10943-RA(CG10943)	1407.3	693.47	1.021	0.0018719	0.0097027	-//-
FBgn0264997	ncRNA(CR44148)	93.1281	45.8912	1.021	0.00022802	0.0015494	-//-
FBgn0030607	doppelganger von brummer(dob)	1308.1	644.634	1.0209	5.14e-10	1.04e-08	sp|P0C548|PLPL2_RAT Patatin-like phospholipase domain-containing protein 2 OS=Rattus norvegicus OX=10116 GN=Pnpla2 PE=1 SV=1//8.53574e-58
FBgn0035996	CG3448 gene product from transcript CG3448-RB(CG3448)	106.824	52.7317	1.0185	9.84e-05	0.00073811	-//-
FBgn0032381	Maltase B1(Mal-B1)	1948.13	961.737	1.0184	0.0066551	0.028461	sp|O16098|MAL1_DROVI Maltase 1 OS=Drosophila virilis OX=7244 GN=Mal-B1 PE=3 SV=2//0
FBgn0267617	ncRNA(CR45955)	363.918	179.794	1.0173	1.01e-07	1.38e-06	sp|P05149|GALM_ACICA Aldose 1-epimerase OS=Acinetobacter calcoaceticus OX=471 GN=mro PE=1 SV=1//1.97448e-12
FBgn0266705	ncRNA(CR45195)	130.201	64.328	1.0172	3.07e-05	0.00025863	sp|Q58D31|DHSO_BOVIN Sorbitol dehydrogenase OS=Bos taurus OX=9913 GN=SORD PE=2 SV=3//3.94561e-07
FBgn0024293	Serpin 43Ab(Spn43Ab)	6447.92	3185.76	1.0172	5.64e-11	1.28e-09	sp|Q7YTY6|SP42D_DROME Serine protease inhibitor 42Dd OS=Drosophila melanogaster OX=7227 GN=Spn42Dd PE=2 SV=1//5.84941e-44
FBgn0031313	CG5080 gene product from transcript CG5080-RB(CG5080)	2154.57	1065.77	1.0155	2.09e-10	4.44e-09	-//-
FBgn0054045	CG34045 gene product from transcript CG34045-RB(CG34045)	36.3187	17.9689	1.0152	0.010731	0.042683	-//-
FBgn0040959	CG17814 gene product from transcript CG17814-RA(Peritrophin-15a)	799.06	395.669	1.014	0.00041917	0.0026518	-//-
FBgn0031563	CG10031 gene product from transcript CG10031-RA(CG10031)	1272.39	630.17	1.0137	5.71e-06	5.69e-05	sp|P26228|SBPI_NEOBL Protease inhibitor OS=Neobellieria bullata OX=7385 PE=1 SV=1//2.35391e-16
FBgn0040606	CG6503 gene product from transcript CG6503-RA(CG6503)	24501.6	12135.5	1.0136	0.00049776	0.0030749	-//-
FBgn0051205	CG31205 gene product from transcript CG31205-RC(CG31205)	5572.27	2760.77	1.0132	0.00010411	0.00077582	sp|Q8I6K0|PPAF3_HOLDI Phenoloxidase-activating factor 3 OS=Holotrichia diomphalia OX=33394 GN=PPAF3 PE=1 SV=1//3.51668e-15
FBgn0051313	CG31313 gene product from transcript CG31313-RA(CG31313)	3995.28	1980.64	1.0123	0.00015355	0.0011018	sp|P23779|CYTL_DROME Cystatin-like protein OS=Drosophila melanogaster OX=7227 GN=Cys PE=2 SV=2//3.70445e-29
FBgn0050281	CG30281 gene product from transcript CG30281-RA(CG30281)	492.733	244.468	1.0112	3.51e-07	4.38e-06	sp|A2AV25|FBCD1_MOUSE Fibrinogen C domain-containing protein 1 OS=Mus musculus OX=10090 GN=Fibcd1 PE=2 SV=1//1.60005e-52
FBgn0003390	shifted(shf)	862.365	428.144	1.0102	2.89e-09	5.25e-08	sp|Q9W3W5|WIF1_DROME Protein shifted OS=Drosophila melanogaster OX=7227 GN=shf PE=1 SV=2//0
FBgn0266626	ncRNA(CR45133)	81.2965	40.3969	1.009	0.00046973	0.0029277	sp|Q9Z351|KCNQ2_MOUSE Potassium voltage-gated channel subfamily KQT member 2 OS=Mus musculus OX=10090 GN=Kcnq2 PE=1 SV=1//8.03268e-07
FBgn0031490	CG17264 gene product from transcript CG17264-RA(CG17264)	385.572	191.822	1.0072	9.25e-08	1.28e-06	-//-
FBgn0264517	ncRNA(CR43916)	110.28	54.8771	1.0069	0.010818	0.042934	sp|P15122|ALDR_RABIT Aldose reductase OS=Oryctolagus cuniculus OX=9986 GN=AKR1B1 PE=2 SV=3//6.58192e-11
FBgn0037577	CG7443 gene product from transcript CG7443-RA(CG7443)	183.264	91.2776	1.0056	7.58e-06	7.39e-05	-//-
FBgn0033340	CG13751 gene product from transcript CG13751-RA(CG13751)	1148.03	571.902	1.0053	3.48e-05	0.00028897	-//-
FBgn0054026	CG34026 gene product from transcript CG34026-RB(CG34026)	6267.36	3123.92	1.0045	8.75e-05	0.00066387	-//-
FBgn0035393	CG16753 gene product from transcript CG16753-RA(CG16753)	477.647	238.133	1.0042	9.22e-07	1.07e-05	-//-
FBgn0043002	Chromatin accessibility complex 14kD protein(Chrac-14)	84.7103	42.2326	1.0042	0.00040961	0.0025964	sp|Q642A5|DPOE3_RAT DNA polymerase epsilon subunit 3 OS=Rattus norvegicus OX=10116 GN=Pole3 PE=1 SV=1//2.9288e-18
FBgn0051373	CG31373 gene product from transcript CG31373-RA(CG31373)	3746.66	1868.46	1.0038	0.00013666	0.00099476	sp|Q9HBH1|DEFM_HUMAN Peptide deformylase, mitochondrial OS=Homo sapiens OX=9606 GN=PDF PE=1 SV=1//1.01428e-42
FBgn0261608	Ribosomal protein L37A(RpL37A)	35084.8	17501.2	1.0034	4.08e-06	4.2e-05	sp|Q9VMU4|RL37A_DROME 60S ribosomal protein L37a OS=Drosophila melanogaster OX=7227 GN=RpL37A PE=1 SV=3//3.92993e-46
FBgn0029147	CG6698 gene product from transcript CG6698-RA(NtR)	446.216	222.68	1.0028	1.7e-07	2.26e-06	sp|P49579|ACHB_XENLA Acetylcholine receptor subunit beta (Fragment) OS=Xenopus laevis OX=8355 GN=chrnb1 PE=2 SV=1//1.0497e-08
FBgn0034580	CG9357 gene product from transcript CG9357-RA(Cht8)	904.744	451.853	1.0017	0.0011091	0.0061688	sp|Q91XA9|CHIA_MOUSE Acidic mammalian chitinase OS=Mus musculus OX=10090 GN=Chia PE=1 SV=2//9.56204e-107
FBgn0047178	CG32147 gene product from transcript CG32147-RA(CG32147)	630.589	314.983	1.0014	1.4e-08	2.26e-07	sp|Q76IC5|PGPI_RAT Pyroglutamyl-peptidase 1 OS=Rattus norvegicus OX=10116 GN=Pgpep1 PE=1 SV=1//2.96647e-27
FBgn0267646	ncRNA(CR45984)	31.9567	63.9246	-1.0003	0.0015155	0.0081065	-//-
FBgn0030015	CG10761 gene product from transcript CG10761-RA(CG10761)	389.507	779.321	-1.0006	6.9207e-09	1.1845e-07	sp|Q3KNM2|MARH5_MOUSE E3 ubiquitin-protein ligase MARCH5 OS=Mus musculus OX=10090 GN=March5 PE=1 SV=1//1.22106e-54
FBgn0029890	CG4095 gene product from transcript CG4095-RA(CG4095)	544.384	1089.42	-1.0009	2.5486e-09	4.6871e-08	sp|O17214|FUMH_CAEEL Probable fumarate hydratase, mitochondrial OS=Caenorhabditis elegans OX=6239 GN=fum-1 PE=3 SV=1//0
FBgn0028902	Tektin A(Tektin-A)	1859.58	3722.1	-1.0011	2.6188e-10	5.4756e-09	sp|Q149S1|TEKT4_MOUSE Tektin-4 OS=Mus musculus OX=10090 GN=Tekt4 PE=1 SV=1//1.17823e-58
FBgn0028897	CG4935 gene product from transcript CG4935-RA(CG4935)	276.846	554.427	-1.0019	2.8771e-08	4.3652e-07	sp|Q9DAJ4|WDR83_MOUSE WD repeat domain-containing protein 83 OS=Mus musculus OX=10090 GN=Wdr83 PE=1 SV=1//9.48345e-91
FBgn0039668	TRC8 ortholog(Trc8)	1856.64	3719.66	-1.0025	2.3753e-10	4.999e-09	sp|Q7KRW1|TRC8_DROME Protein TRC8 homolog OS=Drosophila melanogaster OX=7227 GN=Trc8 PE=1 SV=1//0
FBgn0283503		274.637	550.547	-1.0033	3.442e-06	3.6078e-05	sp|A1L0Y2|NEUL4_XENTR Neuralized-like protein 4 OS=Xenopus tropicalis OX=8364 GN=neurl4 PE=2 SV=1//1.38152e-21
FBgn0051413	CG31413 gene product from transcript CG31413-RA(CG31413)	302.969	607.78	-1.0044	1.2211e-08	1.9963e-07	sp|Q6AX23|QSOX2_XENLA Sulfhydryl oxidase 2 OS=Xenopus laevis OX=8355 GN=qsox2 PE=2 SV=1//9.63365e-47
FBgn0038135	CG8773 gene product from transcript CG8773-RB(CG8773)	160.949	323.098	-1.0054	2.1455e-06	2.3454e-05	sp|P50123|AMPE_RAT Glutamyl aminopeptidase OS=Rattus norvegicus OX=10116 GN=Enpep PE=1 SV=2//0
FBgn0029859	CG15892 gene product from transcript CG15892-RA(CG15892)	1972.21	3960.47	-1.0059	1.9925e-10	4.2661e-09	-//-
FBgn0036367	CG10116 gene product from transcript CG10116-RA(CG10116)	224.731	452.085	-1.0084	2.114e-06	2.3173e-05	sp|Q6PA23|LIPHA_XENLA Lipase member H-A OS=Xenopus laevis OX=8355 GN=liph-a PE=2 SV=1//4.71178e-25
FBgn0031343	CG18131 gene product from transcript CG18131-RG(CG18131)	806.992	1624.33	-1.0092	6.6618e-10	1.3206e-08	-//-
FBgn0039139	Inducer of meiosis 4(Ime4)	141.23	284.453	-1.0101	5.3135e-07	6.4263e-06	sp|Q9VCE6|MTA70_DROME N6-adenosine-methyltransferase MT-A70-like protein OS=Drosophila melanogaster OX=7227 GN=Ime4 PE=1 SV=1//0
FBgn0053673	CG33673 gene product from transcript CG33673-RB(CG33673)	21.642	43.5949	-1.0103	0.0059932	0.02607	sp|Q8BJZ3|LFG3_MOUSE Protein lifeguard 3 OS=Mus musculus OX=10090 GN=Tmbim1 PE=1 SV=1//8.24354e-15
FBgn0267418	pseudo(CR45771)	27.4889	55.3913	-1.0108	0.0027279	0.013432	sp|P16909|18C_DROME Histone-like protein 18C OS=Drosophila melanogaster OX=7227 GN=Mst77F PE=2 SV=1//5.17266e-101
FBgn0264368	ncRNA(CR43820)	73.6949	148.505	-1.0109	1.9817e-05	0.00017423	-//-
FBgn0267789	ncRNA(CR46120)	48.7887	98.3899	-1.012	0.0001997	0.0013852	-//-
FBgn0030597	Ecdysone oxidase(Eo)	19.0303	38.4658	-1.0153	0.0091185	0.037257	sp|P18173|DHGL_DROME Glucose dehydrogenase [FAD, quinone] OS=Drosophila melanogaster OX=7227 GN=Gld PE=3 SV=3//1.80186e-49
FBgn0035781	CG8560 gene product from transcript CG8560-RA(CG8560)	557.728	1127.99	-1.0161	1.0295e-09	1.9845e-08	sp|P04069|CBPB_ASTAS Carboxypeptidase B OS=Astacus astacus OX=6715 PE=1 SV=1//2.15348e-81
FBgn0038909	CG6569 gene product from transcript CG6569-RA(CG6569)	1260.52	2552.36	-1.0178	1.966e-10	4.2151e-09	-//-
FBgn0015032	Cytochrome P450-4c3(Cyp4c3)	19.2831	39.056	-1.0182	0.0086774	0.035655	sp|Q9VA27|CP4C3_DROME Cytochrome P450 4c3 OS=Drosophila melanogaster OX=7227 GN=Cyp4c3 PE=2 SV=1//0
FBgn0034144	CG5089 gene product from transcript CG5089-RA(CG5089)	8377.19	16976.8	-1.019	4.9952e-11	1.151e-09	-//-
FBgn0035704	CG10144 gene product from transcript CG10144-RA(CG10144)	245.523	497.656	-1.0193	2.4873e-08	3.8208e-07	sp|Q9VRX2|VPS8_DROME Vacuolar protein sorting-associated protein 8 homolog OS=Drosophila melanogaster OX=7227 GN=Vps8 PE=1 SV=1//0
FBgn0086362	CG12114 gene product from transcript CG12114-RA(spn-F)	369.564	749.235	-1.0196	4.0003e-09	7.0966e-08	sp|Q9V9Y9|SPNF_DROME Protein spindle-F OS=Drosophila melanogaster OX=7227 GN=spn-F PE=1 SV=1//0
FBgn0038715	CG7333 gene product from transcript CG7333-RB(CG7333)	27.9163	56.5972	-1.0196	0.0021387	0.01092	sp|Q95R48|OCTL_DROME Organic cation transporter-like protein OS=Drosophila melanogaster OX=7227 GN=Orct2 PE=2 SV=2//2.99501e-47
FBgn0020371	Translocase inner membrane 17(Tim17b2)	1070.3	2171.29	-1.0205	2.2554e-10	4.7592e-09	sp|Q2HJE9|TI17B_BOVIN Mitochondrial import inner membrane translocase subunit Tim17-B OS=Bos taurus OX=9913 GN=TIMM17B PE=2 SV=1//1.11027e-59
FBgn0037454	CG1137 gene product from transcript CG1137-RA(CG1137)	2884	5852.66	-1.021	5.7541e-10	1.1492e-08	-//-
FBgn0037037	CG10588 gene product from transcript CG10588-RB(CG10588)	326.381	662.654	-1.0217	5.1174e-09	8.9204e-08	sp|Q8BHG1|NRDC_MOUSE Nardilysin OS=Mus musculus OX=10090 GN=Nrdc PE=1 SV=1//2.92012e-177
FBgn0032210	cylindromatosis ortholog (H. sapiens)(CYLD)	772.648	1569.15	-1.0221	4.6555e-10	9.4507e-09	sp|Q9NQC7|CYLD_HUMAN Ubiquitin carboxyl-terminal hydrolase CYLD OS=Homo sapiens OX=9606 GN=CYLD PE=1 SV=1//1.20479e-139
FBgn0026160	tonalli(tna)	1792.7	3641.08	-1.0222	1.0767e-10	2.3687e-09	sp|Q9ULJ6|ZMIZ1_HUMAN Zinc finger MIZ domain-containing protein 1 OS=Homo sapiens OX=9606 GN=ZMIZ1 PE=1 SV=3//4.55109e-107
FBgn0037365	CG2104 gene product from transcript CG2104-RB(CG2104)	577.626	1173.58	-1.0227	9.7136e-10	1.8791e-08	sp|P58389|PTPA_MOUSE Serine/threonine-protein phosphatase 2A activator OS=Mus musculus OX=10090 GN=Ptpa PE=1 SV=1//4.74886e-43
FBgn0029658	CG14269 gene product from transcript CG14269-RB(CG14269)	422.952	860.022	-1.0239	2.6589e-09	4.8565e-08	-//-
FBgn0033042	Tetraspanin 42A(Tsp42A)	70.7248	143.813	-1.0239	5.534e-05	0.00044	-//-
FBgn0264560	gartenzwerg(garz)	1000.48	2035.52	-1.0247	2.8031e-08	4.261e-07	sp|Q92538|GBF1_HUMAN Golgi-specific brefeldin A-resistance guanine nucleotide exchange factor 1 OS=Homo sapiens OX=9606 GN=GBF1 PE=1 SV=2//0
FBgn0262894	CG43249 gene product from transcript CG43249-RA(CG43249)	47.2323	96.1473	-1.0255	0.00017034	0.0012066	-//-
FBgn0038821	CG17267 gene product from transcript CG17267-RC(CG17267)	21.2022	43.186	-1.0263	0.0057069	0.025054	-//-
FBgn0035647	CG10486 gene product from transcript CG10486-RB(CG10486)	18.9052	38.5109	-1.0265	0.0082785	0.034138	sp|Q9VIK2|CART_DROME Carcinine transporter OS=Drosophila melanogaster OX=7227 GN=CarT PE=2 SV=1//3.58409e-59
FBgn0051093	CG31093 gene product from transcript CG31093-RA(CG31093)	204.349	416.326	-1.0267	4.374e-08	6.4295e-07	-//-
FBgn0042127	CG18789 gene product from transcript CG18789-RA(CG18789)	18.3201	37.3451	-1.0275	0.011152	0.044063	-//-
FBgn0038832	CG15695 gene product from transcript CG15695-RA(CG15695)	226.126	461.039	-1.0278	2.4766e-08	3.8079e-07	-//-
FBgn0051845	ncRNA(CR31845)	25.9145	52.8438	-1.028	0.0028116	0.013768	-//-
FBgn0030343	CG1886 gene product from transcript CG1886-RC(ATP7)	1339.43	2732.55	-1.0286	1.3731e-10	2.9837e-09	sp|Q04656|ATP7A_HUMAN Copper-transporting ATPase 1 OS=Homo sapiens OX=9606 GN=ATP7A PE=1 SV=4//1.18894e-14
FBgn0262102	CG42855 gene product from transcript CG42855-RB(CG42855)	745.092	1520.26	-1.0288	3.5848e-10	7.3798e-09	-//-
FBgn0038851	doublesex-Mab related 93B(dmrt93B)	35.9202	73.2951	-1.0289	0.00063441	0.0037991	sp|Q6YHU8|DMTA2_ORENI Doublesex- and mab-3-related transcription factor A2 OS=Oreochromis niloticus OX=8128 GN=dmrta2 PE=3 SV=1//7.87744e-31
FBgn0261816	CG42758 gene product from transcript CG42758-RA(CG42758)	743.095	1516.62	-1.0292	3.87e-10	7.9264e-09	-//-
FBgn0032313	CG14070 gene product from transcript CG14070-RB(CG14070)	227.561	464.447	-1.0293	2.337e-08	3.6037e-07	-//-
FBgn0264353	ncRNA(CR43809)	23.2342	47.4329	-1.0296	0.0037892	0.017789	sp|Q14165|MLEC_HUMAN Malectin OS=Homo sapiens OX=9606 GN=MLEC PE=1 SV=1//1.21917e-62
FBgn0037970	Glutamate Carrier 2(GC2)	969.202	1978.85	-1.0298	2.1321e-10	4.5168e-09	sp|Q08DK4|GHC1_BOVIN Mitochondrial glutamate carrier 1 OS=Bos taurus OX=9913 GN=SLC25A22 PE=2 SV=1//5.41876e-76
FBgn0028475	CG10221 gene product from transcript CG10221-RB(Hrd3)	1051.4	2147.5	-1.0303	1.6513e-10	3.5642e-09	sp|Q80Z70|SE1L1_RAT Protein sel-1 homolog 1 OS=Rattus norvegicus OX=10116 GN=Sel1l PE=1 SV=2//0
FBgn0032467	CG9934 gene product from transcript CG9934-RA(CG9934)	791.769	1617.69	-1.0308	2.1143e-07	2.7478e-06	sp|Q9ES00|UBE4B_MOUSE Ubiquitin conjugation factor E4 B OS=Mus musculus OX=10090 GN=Ube4b PE=1 SV=3//0
FBgn0031772	CG13994 gene product from transcript CG13994-RA(CG13994)	222.618	454.891	-1.031	2.5314e-08	3.8811e-07	sp|Q09384|YS88_CAEEL Uncharacterized protein ZK945.8 OS=Caenorhabditis elegans OX=6239 GN=ZK945.8 PE=4 SV=1//1.11729e-10
FBgn0032371	CG4983 gene product from transcript CG4983-RB(CG4983)	1039.73	2125.49	-1.0316	1.4205e-10	3.0826e-09	-//-
FBgn0032699	CG10383 gene product from transcript CG10383-RB(CG10383)	499.072	1020.47	-1.0319	8.5366e-10	1.6655e-08	sp|Q96JX3|SRAC1_HUMAN Protein SERAC1 OS=Homo sapiens OX=9606 GN=SERAC1 PE=1 SV=1//2.89381e-22
FBgn0025702	Serine-arginine protein kinase at 79D(Srpk79D)	1223.41	2503.94	-1.0333	1.1747e-10	2.5701e-09	sp|Q9UPE1|SRPK3_HUMAN SRSF protein kinase 3 OS=Homo sapiens OX=9606 GN=SRPK3 PE=1 SV=2//2.52462e-64
FBgn0033330	CG8746 gene product from transcript CG8746-RA(CG8746)	633.221	1296.81	-1.0342	3.9648e-10	8.0999e-09	-//-
FBgn0039188	Golgin-84 ortholog (H. sapiens)(Golgin84)	466.71	956.161	-1.0347	1.2172e-09	2.3238e-08	sp|Q8SZ63|GOGA5_DROME Golgin-84 OS=Drosophila melanogaster OX=7227 GN=Golgin84 PE=1 SV=2//0
FBgn0034463	CG15125 gene product from transcript CG15125-RA(CG15125)	178.276	365.371	-1.0352	7.6063e-08	1.0714e-06	-//-
FBgn0037359	Mediator complex subunit 27(MED27)	280.533	575.493	-1.0366	6.9918e-09	1.1941e-07	sp|Q9VNG0|MED27_DROME Mediator of RNA polymerase II transcription subunit 27 OS=Drosophila melanogaster OX=7227 GN=MED27 PE=1 SV=1//0
FBgn0053061	CG33061 gene product from transcript CG33061-RC(CG33061)	164.684	337.862	-1.0367	1.1108e-07	1.5174e-06	sp|Q7ZVP8|TM38B_DANRE Trimeric intracellular cation channel type B OS=Danio rerio OX=7955 GN=tmem38b PE=2 SV=1//3.93798e-09
FBgn0266027	ncRNA(CR44792)	26.6194	54.6192	-1.0369	0.0033042	0.015846	-//-
FBgn0033860	Sperm-Leucylaminopeptidase 5(S-Lap5)	1524.31	3128.84	-1.0375	7.3698e-11	1.6623e-09	sp|P00727|AMPL_BOVIN Cytosol aminopeptidase OS=Bos taurus OX=9913 GN=LAP3 PE=1 SV=3//9.51323e-106
FBgn0037030	CG3288 gene product from transcript CG3288-RB(CG3288)	46.7898	96.1051	-1.0384	0.00013852	0.0010034	-//-
FBgn0029701	CG12691 gene product from transcript CG12691-RA(CG12691)	134.163	275.664	-1.0389	3.1821e-07	4.0151e-06	-//-
FBgn0033443	CG1698 gene product from transcript CG1698-RA(CG1698)	79.8333	164.039	-1.039	6.3966e-06	6.3056e-05	sp|B4NDL8|NAAT1_DROWI Sodium-dependent nutrient amino acid transporter 1 OS=Drosophila willistoni OX=7260 GN=NAAT1 PE=3 SV=1//2.09524e-174
FBgn0263867	ncRNA(CR43714)	18.0467	37.0894	-1.0393	0.008607	0.035374	-//-
FBgn0011737	Wee1 kinase(Wee1)	548.287	1127.66	-1.0403	3.4468e-09	6.1831e-08	sp|P54350|WEE1_DROME Wee1-like protein kinase OS=Drosophila melanogaster OX=7227 GN=Wee1 PE=1 SV=2//0
FBgn0031128	CG1338 gene product from transcript CG1338-RA(hydra)	1495.34	3077.42	-1.0412	4.9904e-11	1.151e-09	-//-
FBgn0030228	BTB (POZ) domain containing 9 ortholog(BTBD9)	372.094	766.034	-1.0417	1.5043e-05	0.00013692	sp|Q9W2S3|BTBD9_DROME BTB/POZ domain-containing protein 9 OS=Drosophila melanogaster OX=7227 GN=BTBD9 PE=1 SV=1//0
FBgn0031533	CG2772 gene product from transcript CG2772-RA(CG2772)	186.289	383.573	-1.042	4.8336e-08	7.0487e-07	sp|O46108|LIP3_DROME Lipase 3 OS=Drosophila melanogaster OX=7227 GN=Lip3 PE=2 SV=1//2.36965e-94
FBgn0267644	ncRNA(CR45982)	47.9674	98.8203	-1.0428	0.00011427	0.0008445	-//-
FBgn0264435	ncRNA(CR43853)	26.2319	54.0579	-1.0432	0.0035639	0.016914	-//-
FBgn0037165	CG11437 gene product from transcript CG11437-RA(CG11437)	30.6406	63.1679	-1.0437	0.0010135	0.0057028	sp|Q9V576|WUN_DROME Putative phosphatidate phosphatase OS=Drosophila melanogaster OX=7227 GN=wun PE=1 SV=2//1.23553e-35
FBgn0038919	CG17843 gene product from transcript CG17843-RA(CG17843)	1872.2	3859.77	-1.0438	3.1708e-11	7.567e-10	sp|O08841|QSOX1_CAVPO Sulfhydryl oxidase 1 OS=Cavia porcellus OX=10141 GN=QSOX1 PE=2 SV=2//2.6665e-76
FBgn0285892		180.856	372.902	-1.044	4.8383e-08	7.0487e-07	sp|E1JH25|TEA_DROME Protein telomere ends associated OS=Drosophila melanogaster OX=7227 GN=tea PE=1 SV=1//0
FBgn0264464	ncRNA(CR43872)	46.6318	96.1749	-1.0443	0.0007945	0.0046014	sp|Q9VWB0|TECPR_DROME Tectonin beta-propeller repeat-containing protein OS=Drosophila melanogaster OX=7227 GN=Pex23 PE=2 SV=2//1.57266e-29
FBgn0265193	Activating transcription factor-2(Atf-2)	131.162	270.549	-1.0445	3.4921e-07	4.3649e-06	sp|P15336|ATF2_HUMAN Cyclic AMP-dependent transcription factor ATF-2 OS=Homo sapiens OX=9606 GN=ATF2 PE=1 SV=4//2.26064e-08
FBgn0037323	CG2663 gene product from transcript CG2663-RA(CG2663)	151.244	312.115	-1.0452	0.0016739	0.0088131	sp|Q9D3D0|TTPAL_MOUSE Alpha-tocopherol transfer protein-like OS=Mus musculus OX=10090 GN=Ttpal PE=1 SV=3//1.57063e-28
FBgn0030721	CG12698 gene product from transcript CG12698-RA(CG12698)	275.663	569.042	-1.0456	5.8333e-09	1.0081e-07	sp|Q96M20|CNBD2_HUMAN Cyclic nucleotide-binding domain-containing protein 2 OS=Homo sapiens OX=9606 GN=CNBD2 PE=2 SV=2//1.4051e-10
FBgn0265266	CG13639 gene product from transcript CG13639-RA(CG13639)	119.631	247.118	-1.0466	4.1997e-07	5.1808e-06	-//-
FBgn0053333	CG33333 gene product from transcript CG33333-RA(CG33333)	18.5837	38.4027	-1.0472	0.0077559	0.032442	-//-
FBgn0037661	Adenosine deaminase(Ada)	65.2364	134.825	-1.0473	1.8231e-05	0.00016153	sp|Q9VHH7|ADAL_DROME Adenosine deaminase-like protein OS=Drosophila melanogaster OX=7227 GN=Ada PE=2 SV=1//0
FBgn0011559	Accessory gland protein 36DE(Acp36DE)	13805.7	28562.1	-1.0488	4.3243e-09	7.5958e-08	sp|Q9V3R1|A36DE_DROME Accessory gland protein Acp36DE OS=Drosophila melanogaster OX=7227 GN=Acp36DE PE=2 SV=1//1.90015e-115
FBgn0050357	CG30357 gene product from transcript CG30357-RA(CG30357)	166.486	344.481	-1.049	7.2563e-08	1.028e-06	sp|Q53HC5|KLH26_HUMAN Kelch-like protein 26 OS=Homo sapiens OX=9606 GN=KLHL26 PE=1 SV=2//2.43011e-10
FBgn0264506	ncRNA(CR43905)	198.611	411.659	-1.0515	2.3265e-08	3.591e-07	-//-
FBgn0051363	CG31363 gene product from transcript CG31363-RI(Jupiter)	1718.01	3562.97	-1.0523	5.6312e-07	6.7748e-06	sp|Q9I7K0|JUPIT_DROME Microtubule-associated protein Jupiter OS=Drosophila melanogaster OX=7227 GN=Jupiter PE=1 SV=2//2.16872e-134
FBgn0051233	CG31233 gene product from transcript CG31233-RB(CG31233)	310.579	644.229	-1.0526	0.0089567	0.036689	sp|P91887|AMPN_PLUXY Aminopeptidase N OS=Plutella xylostella OX=51655 GN=APN1 PE=1 SV=1//5.63244e-146
FBgn0033673	CG8298 gene product from transcript CG8298-RC(CG8298)	418.023	867.315	-1.053	8.5659e-10	1.6677e-08	sp|Q14409|GLPK3_HUMAN Glycerol kinase 3 OS=Homo sapiens OX=9606 GN=GK3P PE=2 SV=2//3.18559e-122
FBgn0002924	non-claret disjunctional(ncd)	109.98	228.184	-1.053	0.0028445	0.013908	sp|P20480|NCD_DROME Protein claret segregational OS=Drosophila melanogaster OX=7227 GN=ncd PE=1 SV=1//0
FBgn0266623	ncRNA(CR45130)	67.9233	140.954	-1.0532	1.3788e-05	0.0001265	sp|A1Z713|VPS13_DROME Vacuolar protein sorting-associated protein 13 OS=Drosophila melanogaster OX=7227 GN=Vps13 PE=1 SV=2//5.78711e-160
FBgn0267453	ncRNA(CR45803)	20.9069	43.3934	-1.0535	0.0048004	0.021625	sp|Q10917|YT13_CAEEL Putative transporter B0252.3 OS=Caenorhabditis elegans OX=6239 GN=B0252.3 PE=3 SV=3//2.95135e-15
FBgn0037419	Osiris 12(Osi12)	21.2779	44.175	-1.0539	0.0041147	0.019038	-//-
FBgn0262105	ncRNA(CR42858)	24.222	50.3166	-1.0547	0.0026356	0.013029	-//-
FBgn0038102	CG14383 gene product from transcript CG14383-RA(CG14383)	162.429	337.551	-1.0553	6.7618e-08	9.6134e-07	-//-
FBgn0037023	CG3698 gene product from transcript CG3698-RA(CG3698)	173.13	359.911	-1.0558	4.8392e-08	7.0487e-07	-//-
FBgn0031052	CG14215 gene product from transcript CG14215-RA(CG14215)	511.855	1064.7	-1.0566	0.0022197	0.011279	sp|Q9VWE6|ELYS_DROME Protein ELYS homolog OS=Drosophila melanogaster OX=7227 GN=CG14215 PE=1 SV=2//0
FBgn0012058	Cell division cycle 27 ortholog(Cdc27)	524.017	1090.34	-1.0571	3.9959e-09	7.0965e-08	sp|Q4V8A2|CDC27_RAT Cell division cycle protein 27 homolog OS=Rattus norvegicus OX=10116 GN=Cdc27 PE=2 SV=1//2.01931e-178
FBgn0037843	CG4511 gene product from transcript CG4511-RA(CG4511)	394.916	821.802	-1.0572	5.4316e-07	6.5493e-06	sp|Q9CQ79|TXND9_MOUSE Thioredoxin domain-containing protein 9 OS=Mus musculus OX=10090 GN=Txndc9 PE=1 SV=1//5.37116e-67
FBgn0028360	Cdc7 kinase(Cdc7)	624.703	1300.16	-1.0574	6.2018e-07	7.4278e-06	sp|Q9Z0H0|CDC7_MOUSE Cell division cycle 7-related protein kinase OS=Mus musculus OX=10090 GN=Cdc7 PE=1 SV=2//2.63742e-28
FBgn0031332	CG5556 gene product from transcript CG5556-RA(CG5556)	752.638	1566.86	-1.0578	1.2115e-10	2.6469e-09	sp|Q94529|GS1_DROME Probable pseudouridine-5&apos;-phosphatase OS=Drosophila melanogaster OX=7227 GN=Gs1l PE=2 SV=2//4.46167e-27
FBgn0036729	CG13733 gene product from transcript CG13733-RA(CG13733)	1006.68	2096.92	-1.0587	5.9338e-11	1.3479e-09	-//-
FBgn0036751	Adenosine deaminase-related growth factor B(Adgf-B)	762.684	1589.07	-1.059	1.0324e-10	2.2773e-09	sp|Q2VQV9|ADA2_XENLA Adenosine deaminase 2 OS=Xenopus laevis OX=8355 GN=ada2 PE=1 SV=1//6.00454e-116
FBgn0035481	CG12605 gene product from transcript CG12605-RD(CG12605)	1097.42	2288.1	-1.06	4.9272e-11	1.1386e-09	sp|Q99M85|SCRT1_MOUSE Transcriptional repressor scratch 1 OS=Mus musculus OX=10090 GN=Scrt1 PE=1 SV=1//1.25402e-68
FBgn0042126	CG18788 gene product from transcript CG18788-RB(CG18788)	23.2136	48.4071	-1.0603	0.0027606	0.013559	sp|O61369|PICO_DROAN Putative inorganic phosphate cotransporter OS=Drosophila ananassae OX=7217 GN=Picot PE=3 SV=1//6.92832e-38
FBgn0039251	CG17462 gene product from transcript CG17462-RA(Trf4-2)	562.388	1172.83	-1.0604	2.3869e-10	5.0169e-09	sp|Q9VC07|TRF42_DROME Inactive non-canonical poly(A) RNA polymerase protein Trf4-2 OS=Drosophila melanogaster OX=7227 GN=Trf4-2 PE=2 SV=1//0
FBgn0032464	Vacuolar H[+] ATPase 68kD subunit 3(Vha68-3)	2994.25	6245.35	-1.0606	1.4193e-11	3.5698e-10	sp|Q27331|VATA2_DROME V-type proton ATPase catalytic subunit A isoform 2 OS=Drosophila melanogaster OX=7227 GN=Vha68-2 PE=1 SV=2//0
FBgn0032373	Vacuolar H[+] ATPase 100kD subunit 5(Vha100-5)	321.486	670.728	-1.061	4.1549e-08	6.1412e-07	sp|Q8AVM5|VPP1_XENLA V-type proton ATPase 116 kDa subunit a isoform 1 OS=Xenopus laevis OX=8355 GN=atp6v0a1 PE=2 SV=1//0
FBgn0053489	CG33489 gene product from transcript CG33489-RA(CG33489)	347.667	725.724	-1.0617	1.2026e-09	2.2987e-08	sp|Q8N7U6|EFHB_HUMAN EF-hand domain-containing family member B OS=Homo sapiens OX=9606 GN=EFHB PE=2 SV=4//3.52243e-08
FBgn0036714	CG7692 gene product from transcript CG7692-RD(CG7692)	244.085	509.944	-1.063	0.00030545	0.0020084	-//-
FBgn0036654	CG9692 gene product from transcript CG9692-RB(CG9692)	118.828	248.501	-1.0644	6.9973e-07	8.3061e-06	-//-
FBgn0001075	fat(ft)	36.0519	75.4075	-1.0646	0.00038851	0.0024783	sp|P33450|FAT_DROME Cadherin-related tumor suppressor OS=Drosophila melanogaster OX=7227 GN=ft PE=1 SV=3//0
FBgn0015376	CG33122 gene product from transcript CG33122-RA(cutlet)	74.64	156.172	-1.0651	5.4706e-06	5.4628e-05	sp|Q6NU40|CTF18_XENLA Chromosome transmission fidelity protein 18 homolog OS=Xenopus laevis OX=8355 GN=chtf18 PE=2 SV=1//1.18924e-139
FBgn0031407	CG4270 gene product from transcript CG4270-RA(CG4270)	451.668	945.114	-1.0652	3.622e-10	7.4469e-09	sp|Q9CYL5|GAPR1_MOUSE Golgi-associated plant pathogenesis-related protein 1 OS=Mus musculus OX=10090 GN=Glipr2 PE=1 SV=3//9.92475e-25
FBgn0036180	CG6091 gene product from transcript CG6091-RF(CG6091)	2013.99	4214.89	-1.0654	1.5949e-11	3.9904e-10	sp|Q2YDU3|OTUD5_RAT OTU domain-containing protein 5 OS=Rattus norvegicus OX=10116 GN=Otud5 PE=1 SV=2//2.68113e-70
FBgn0037170	thioredoxin reductase 2(Trxr-2)	514.065	1075.98	-1.0656	2.6151e-10	5.475e-09	sp|Q9VNT5|TRXR2_DROME Thioredoxin reductase 2, mitochondrial OS=Drosophila melanogaster OX=7227 GN=Trxr-2 PE=2 SV=1//0
FBgn0037736	CG12950 gene product from transcript CG12950-RB(CG12950)	358.444	750.302	-1.0657	9.0056e-10	1.7485e-08	sp|Q9R044|NPHN_RAT Nephrin OS=Rattus norvegicus OX=10116 GN=Nphs1 PE=1 SV=2//3.73784e-11
FBgn0032131	CG3841 gene product from transcript CG3841-RB(CG3841)	249.496	522.902	-1.0675	4.1703e-09	7.3574e-08	sp|P35502|ESTF_MYZPE Esterase FE4 OS=Myzus persicae OX=13164 PE=1 SV=1//2.8219e-61
FBgn0034439	CG10062 gene product from transcript CG10062-RC(CG10062)	96.7534	202.798	-1.0677	1.0111e-06	1.1682e-05	sp|Q3UVK0|ERMP1_MOUSE Endoplasmic reticulum metallopeptidase 1 OS=Mus musculus OX=10090 GN=Ermp1 PE=1 SV=2//3.84539e-122
FBgn0039752	CG15530 gene product from transcript CG15530-RB(CG15530)	1100.73	2307.96	-1.0682	3.0205e-11	7.2286e-10	-//-
FBgn0039855	CG1638 gene product from transcript CG1638-RB(CG1638)	368.177	772.067	-1.0683	7.6624e-10	1.5096e-08	sp|Q9R0X4|ACOT9_MOUSE Acyl-coenzyme A thioesterase 9, mitochondrial OS=Mus musculus OX=10090 GN=Acot9 PE=1 SV=1//9.76512e-80
FBgn0040651	CG15458 gene product from transcript CG15458-RA(CG15458)	118.2	248.26	-1.0706	2.7113e-07	3.4536e-06	sp|Q9VR93|RL33_DROME Putative 60S ribosomal protein L33 OS=Drosophila melanogaster OX=7227 GN=CG15458 PE=3 SV=1//1.39918e-39
FBgn0033323	CG12376 gene product from transcript CG12376-RA(CG12376)	881.821	1852.18	-1.0707	4.4275e-11	1.0366e-09	sp|Q925Q3|NCLX_MOUSE Mitochondrial sodium/calcium exchanger protein OS=Mus musculus OX=10090 GN=Slc8b1 PE=2 SV=2//1.2926e-36
FBgn0033888	CG18568 gene product from transcript CG18568-RB(CG18568)	1893.22	3981.25	-1.0724	1.2829e-11	3.2501e-10	-//-
FBgn0032299	CG17127 gene product from transcript CG17127-RB(CG17127)	20.3795	42.8643	-1.0727	0.004223	0.019444	-//-
FBgn0250754	CG42232 gene product from transcript CG42232-RB(CG42232)	336.143	707.149	-1.0729	0.002835	0.013874	-//-
FBgn0011604	Imitation SWI(Iswi)	393.547	828.043	-1.0732	1.1186e-05	0.00010509	sp|Q24368|ISWI_DROME Chromatin-remodeling complex ATPase chain Iswi OS=Drosophila melanogaster OX=7227 GN=Iswi PE=1 SV=1//0
FBgn0036160	CG12289 gene product from transcript CG12289-RA(CG12289)	782.528	1646.69	-1.0734	5.362e-11	1.2249e-09	sp|P50053|KHK_HUMAN Ketohexokinase OS=Homo sapiens OX=9606 GN=KHK PE=1 SV=2//1.95612e-36
FBgn0051948	CG31948 gene product from transcript CG31948-RB(CG31948)	3251.04	6841.59	-1.0734	6.6129e-12	1.7617e-10	-//-
FBgn0013348	Troponin C at 41C(TpnC41C)	2537.92	5343.91	-1.0742	2.2989e-05	0.00019993	sp|P47947|TNNC1_DROME Troponin C, isoform 1 OS=Drosophila melanogaster OX=7227 GN=TpnC41C PE=2 SV=2//6.21193e-98
FBgn0037329	Polymerase (DNA-directed), delta interacting protein 2(POLDIP2)	1686.17	3556.71	-1.0768	1.2091e-11	3.0827e-10	sp|Q91VA6|PDIP2_MOUSE Polymerase delta-interacting protein 2 OS=Mus musculus OX=10090 GN=Poldip2 PE=1 SV=1//8.00344e-135
FBgn0013765	centrosomin(cnn)	1269.54	2678.74	-1.0772	2.9726e-11	7.1365e-10	sp|P54623|CNN_DROME Centrosomin OS=Drosophila melanogaster OX=7227 GN=cnn PE=1 SV=3//0
FBgn0037172	NADH dehydrogenase (ubiquinone) B14.5 A subunit-like(ND-B14.5AL)	429.776	907.158	-1.0778	2.5768e-10	5.4019e-09	sp|Q05752|NDUA7_BOVIN NADH dehydrogenase [ubiquinone] 1 alpha subcomplex subunit 7 OS=Bos taurus OX=9913 GN=NDUFA7 PE=1 SV=2//2.83838e-07
FBgn0051815	CG31815 gene product from transcript CG31815-RA(CG31815)	143.324	302.613	-1.0782	6.6406e-08	9.4579e-07	-//-
FBgn0013725	phyllopod(phyl)	115.408	243.717	-1.0785	2.6759e-07	3.4112e-06	sp|Q27934|PHYL_DROME Protein phyllopod OS=Drosophila melanogaster OX=7227 GN=phyl PE=1 SV=2//0
FBgn0000063	Monopolar spindle 1(Mps1)	50.9167	107.565	-1.079	0.0063719	0.027425	sp|P35761|TTK_MOUSE Dual specificity protein kinase TTK OS=Mus musculus OX=10090 GN=Ttk PE=1 SV=1//1.8466e-54
FBgn0038706	CG3517 gene product from transcript CG3517-RA(CG3517)	6712.36	14186.9	-1.0797	2.5939e-09	4.7595e-08	-//-
FBgn0028372	CG11025 gene product from transcript CG11025-RC(isopeptidase-T-3)	833.192	1761.31	-1.0799	3.6382e-11	8.593e-10	sp|Q9BSL1|UBAC1_HUMAN Ubiquitin-associated domain-containing protein 1 OS=Homo sapiens OX=9606 GN=UBAC1 PE=1 SV=1//3.08139e-23
FBgn0033952	Adenosine deaminase-related growth factor E(Adgf-E)	1074.41	2271.68	-1.0802	1.5348e-10	3.3216e-09	sp|Q5RC46|ADA2_PONAB Adenosine deaminase 2 OS=Pongo abelii OX=9601 GN=ADA2 PE=2 SV=1//2.50891e-101
FBgn0053191	CG33191 gene product from transcript CG33191-RA(CG33191)	434.377	918.752	-1.0807	2.8756e-10	5.9969e-09	-//-
FBgn0037463	don juan like(djl)	1047.24	2217.3	-1.0822	1.7313e-11	4.3045e-10	sp|O01352|DJ_DROME Sperm-specific protein Don juan OS=Drosophila melanogaster OX=7227 GN=dj PE=2 SV=2//4.07524e-16
FBgn0265314	ncRNA(CR44287)	74.4505	157.711	-1.0829	3.439e-06	3.607e-05	sp|P23098|DYHC_TRIGR Dynein beta chain, ciliary OS=Tripneustes gratilla OX=7673 PE=1 SV=1//1.33705e-06
FBgn0027615	CG6404 gene product from transcript CG6404-RA(CG6404)	1040.67	2206.27	-1.0841	2.0114e-11	4.9247e-10	sp|Q3SYV3|OXA1L_BOVIN Mitochondrial inner membrane protein OXA1L OS=Bos taurus OX=9913 GN=OXA1L PE=2 SV=1//9.95765e-85
FBgn0267592	Coiled-Coils Y(CCY)	54.482	115.507	-1.0841	2.6143e-05	0.00022384	-//-
FBgn0033322	CG8584 gene product from transcript CG8584-RA(CG8584)	358.166	759.359	-1.0842	4.6289e-10	9.4086e-09	sp|Q28HW9|CNEP1_XENTR CTD nuclear envelope phosphatase 1 OS=Xenopus tropicalis OX=8364 GN=ctdnep1 PE=2 SV=1//2.15148e-62
FBgn0037490	CG10053 gene product from transcript CG10053-RB(CG10053)	160.756	341.213	-1.0858	2.9331e-08	4.4376e-07	sp|Q6DGZ0|GPT11_DANRE G patch domain-containing protein 11 OS=Danio rerio OX=7955 GN=gpatch11 PE=2 SV=1//1.7035e-46
FBgn0003009	orientation disruptor(ord)	111.342	236.35	-1.0859	2.4998e-07	3.1995e-06	sp|Q24434|ORD_DROME Protein ORD OS=Drosophila melanogaster OX=7227 GN=ord PE=1 SV=2//0
FBgn0034841	CG13541 gene product from transcript CG13541-RB(CG13541)	425.722	903.979	-1.0864	2.0274e-10	4.3294e-09	-//-
FBgn0083966	CG34130 gene product from transcript CG34130-RA(CG34130)	399.789	848.955	-1.0864	2.2204e-10	4.6977e-09	sp|Q9VP95|SEMS_DROME Seminase OS=Drosophila melanogaster OX=7227 GN=Sems PE=1 SV=1//3.10027e-17
FBgn0038449	CG17562 gene product from transcript CG17562-RA(CG17562)	363.831	772.824	-1.0869	1.4652e-08	2.348e-07	sp|Q8MS59|WAT_DROME Fatty acyl-CoA reductase wat OS=Drosophila melanogaster OX=7227 GN=wat PE=1 SV=1//3.32975e-122
FBgn0041147	imaginal discs arrested(ida)	85.2116	181.034	-1.0871	1.6372e-06	1.8259e-05	sp|Q5RE52|APC5_PONAB Anaphase-promoting complex subunit 5 OS=Pongo abelii OX=9601 GN=ANAPC5 PE=2 SV=1//1.06347e-36
FBgn0039347	CG5071 gene product from transcript CG5071-RD(CG5071)	666.514	1416.1	-1.0872	5.039e-11	1.1578e-09	sp|P30405|PPIF_HUMAN Peptidyl-prolyl cis-trans isomerase F, mitochondrial OS=Homo sapiens OX=9606 GN=PPIF PE=1 SV=1//3.28603e-18
FBgn0284420		19.9948	42.4998	-1.0878	0.0039827	0.018546	-//-
FBgn0035915	Sperm-Leucylaminopeptidase 1(S-Lap1)	33972.6	72229.3	-1.0882	7.3891e-10	1.4612e-08	sp|Q68FS4|AMPL_RAT Cytosol aminopeptidase OS=Rattus norvegicus OX=10116 GN=Lap3 PE=1 SV=1//1.44318e-121
FBgn0004374	nebbish(neb)	275.812	587.014	-1.0897	1.7252e-06	1.9147e-05	sp|L0N7N1|KIF14_MOUSE Kinesin-like protein KIF14 OS=Mus musculus OX=10090 GN=Kif14 PE=1 SV=1//6.87193e-138
FBgn0035268	CG8001 gene product from transcript CG8001-RA(CG8001)	770.827	1640.88	-1.09	4.1529e-09	7.3394e-08	sp|Q6NRH1|DCAF8_XENLA DDB1- and CUL4-associated factor 8 OS=Xenopus laevis OX=8355 GN=dcaf8 PE=2 SV=1//1.09938e-92
FBgn0035890	CG13667 gene product from transcript CG13667-RB(CG13667)	509.952	1085.85	-1.0904	1.0345e-10	2.2789e-09	sp|Q6PFP6|NDOR1_DANRE NADPH-dependent diflavin oxidoreductase 1 OS=Danio rerio OX=7955 GN=ndor1 PE=2 SV=1//8.21452e-139
FBgn0031410	CG17237 gene product from transcript CG17237-RA(CG17237)	831.98	1772.53	-1.0912	2.358e-11	5.7296e-10	sp|P54357|MLC2_DROME Myosin-2 essential light chain OS=Drosophila melanogaster OX=7227 GN=Mlc-c PE=1 SV=1//5.66222e-21
FBgn0030001	cypher(cyr)	18.6195	39.7348	-1.0936	0.0049162	0.022109	-//-
FBgn0039360	Cardiolipin synthase(CLS)	594.44	1269.04	-1.0941	5.1972e-11	1.1924e-09	sp|Q8MZC4|CRLS1_DROME Probable cardiolipin synthase (CMP-forming) OS=Drosophila melanogaster OX=7227 GN=CLS PE=2 SV=1//0
FBgn0038686	CG5555 gene product from transcript CG5555-RB(CG5555)	621.482	1327.26	-1.0947	4.0695e-11	9.5413e-10	sp|Q7Z569|BRAP_HUMAN BRCA1-associated protein OS=Homo sapiens OX=9606 GN=BRAP PE=1 SV=2//3.34299e-140
FBgn0267760	ncRNA(CR46091)	18.8599	40.2894	-1.0951	0.0047032	0.021295	-//-
FBgn0004360	Wnt oncogene analog 2(Wnt2)	31.2505	66.7962	-1.0959	0.00051268	0.0031574	sp|P28465|WNT2_DROME Protein Wnt-2 OS=Drosophila melanogaster OX=7227 GN=Wnt2 PE=2 SV=2//0
FBgn0032376	Tetraspanin 33B(Tsp33B)	260.626	557.129	-1.096	1.2363e-09	2.3576e-08	-//-
FBgn0036712	brivido-2(brv2)	15.2756	32.6566	-1.0961	0.0095344	0.038663	sp|Q2EG98|PK1L3_MOUSE Polycystic kidney disease protein 1-like 3 OS=Mus musculus OX=10090 GN=Pkd1l3 PE=1 SV=2//6.39186e-16
FBgn0262996	ncRNA(CR43304)	66.7145	142.809	-1.098	5.8429e-06	5.802e-05	-//-
FBgn0265630	strawberry notch(sno)	555.31	1188.75	-1.0981	6.4558e-05	0.00050701	sp|A8JUV0|SBNO_DROME Protein strawberry notch OS=Drosophila melanogaster OX=7227 GN=sno PE=1 SV=2//1.53254e-24
FBgn0036715	Cadherin 74A(Cad74A)	57.1361	122.442	-1.0996	1.9303e-05	0.00017028	sp|Q9H251|CAD23_HUMAN Cadherin-23 OS=Homo sapiens OX=9606 GN=CDH23 PE=1 SV=2//9.95323e-18
FBgn0039783	prolyl-4-hydroxylase-alpha NE2(PH4alphaNE2)	545.375	1169.89	-1.101	3.561e-11	8.4355e-10	sp|Q10576|P4HA1_CAEEL Prolyl 4-hydroxylase subunit alpha-1 OS=Caenorhabditis elegans OX=6239 GN=dpy-18 PE=1 SV=2//2.67962e-60
FBgn0034670	CG13488 gene product from transcript CG13488-RC(CG13488)	33.2301	71.2976	-1.1014	0.00033535	0.0021835	-//-
FBgn0037939	CG14718 gene product from transcript CG14718-RA(CG14718)	5040.12	10816.1	-1.1016	1.6645e-12	4.801e-11	sp|Q27294|CAZ_DROME RNA-binding protein cabeza OS=Drosophila melanogaster OX=7227 GN=caz PE=2 SV=2//3.98001e-18
FBgn0037101	CG7634 gene product from transcript CG7634-RA(CG7634)	1226.57	2634.05	-1.1027	6.4576e-12	1.726e-10	-//-
FBgn0030846	CG12992 gene product from transcript CG12992-RE(CG12992)	1043.2	2240.49	-1.1028	9.0992e-12	2.3612e-10	-//-
FBgn0036014	CG3222 gene product from transcript CG3222-RA(CG3222)	1455.11	3126.73	-1.1035	4.394e-12	1.2025e-10	sp|Q4VBJ9|MORN5_DANRE MORN repeat-containing protein 5 OS=Danio rerio OX=7955 GN=morn5 PE=2 SV=1//1.08779e-13
FBgn0040237	belphegor(bor)	1724.83	3710.15	-1.105	3.5821e-12	9.8705e-11	sp|Q9VEX6|ATD3A_DROME ATPase family AAA domain-containing protein 3A homolog OS=Drosophila melanogaster OX=7227 GN=bor PE=1 SV=2//0
FBgn0029946	CG15034 gene product from transcript CG15034-RB(CG15034)	511.231	1099.66	-1.105	4.7923e-11	1.1106e-09	-//-
FBgn0036662	CG9706 gene product from transcript CG9706-RA(CG9706)	519.448	1117.49	-1.1052	4.669e-11	1.0883e-09	sp|Q99J27|ACATN_MOUSE Acetyl-coenzyme A transporter 1 OS=Mus musculus OX=10090 GN=Slc33a1 PE=1 SV=1//5.76662e-148
FBgn0031251	CG4213 gene product from transcript CG4213-RA(CG4213)	318.806	686.513	-1.1066	3.182e-10	6.5759e-09	-//-
FBgn0035800	CG7716 gene product from transcript CG7716-RA(CG7716)	767.717	1654.02	-1.1073	1.2506e-11	3.1786e-10	sp|Q9XYP7|GCP2_DROME Gamma-tubulin complex component 2 homolog OS=Drosophila melanogaster OX=7227 GN=Grip84 PE=1 SV=2//7.80116e-61
FBgn0024989	CG3777 gene product from transcript CG3777-RB(CG3777)	22.5376	48.5581	-1.1074	0.0021599	0.011021	-//-
FBgn0036783	Chemosensory protein A 75a(CheA75a)	355.35	767.066	-1.1101	0.003656	0.01728	-//-
FBgn0051481	proboscipedia(pb)	28.5729	61.7034	-1.1107	0.00064208	0.0038393	sp|P31264|HMPB_DROME Homeotic protein proboscipedia OS=Drosophila melanogaster OX=7227 GN=pb PE=2 SV=2//0
FBgn0275432	ncRNA(CR46264)	24.4747	52.8621	-1.1109	0.001338	0.0072628	-//-
FBgn0267993	ncRNA(CR46260)	45.4394	98.1644	-1.1113	4.7198e-05	0.00038036	-//-
FBgn0036492	Bestrophin 3(Best3)	32.9432	71.211	-1.1121	0.00332	0.015908	sp|Q8BGM5|BEST2_MOUSE Bestrophin-2 OS=Mus musculus OX=10090 GN=Best2 PE=2 SV=1//9.12091e-110
FBgn0259140	CG42255 gene product from transcript CG42255-RB(CG42255)	23.8908	51.6621	-1.1126	0.0014534	0.0078082	sp|Q9W332|CUBN_DROME Cubilin homolog OS=Drosophila melanogaster OX=7227 GN=Cubn PE=2 SV=3//0
FBgn0034792	CG3499 gene product from transcript CG3499-RD(CG3499)	1988.6	4300.86	-1.1129	2.1484e-12	6.1197e-11	sp|P54813|YME1_CAEEL ATP-dependent zinc metalloprotease YME1 homolog OS=Caenorhabditis elegans OX=6239 GN=ymel-1 PE=3 SV=2//0
FBgn0036286	CG10616 gene product from transcript CG10616-RC(CG10616)	1066.88	2307.59	-1.113	5.5084e-12	1.4847e-10	sp|Q9VTX8|ODR4_DROME Protein odr-4 homolog OS=Drosophila melanogaster OX=7227 GN=CG10616 PE=3 SV=2//0
FBgn0027568	Cullin-associated and neddylation-dissociated 1(Cand1)	772.366	1670.98	-1.1133	3.9469e-09	7.0173e-08	sp|Q9VKY2|CAND1_DROME Cullin-associated NEDD8-dissociated protein 1 OS=Drosophila melanogaster OX=7227 GN=Cand1 PE=2 SV=1//0
FBgn0267634	ncRNA(CR45972)	17.3034	37.4761	-1.1149	0.0053748	0.023785	-//-
FBgn0029642	CG3592 gene product from transcript CG3592-RA(CG3592)	24.6314	53.3521	-1.115	0.001309	0.0071306	-//-
FBgn0034998	CG13577 gene product from transcript CG13577-RB(CG13577)	320.682	694.764	-1.1154	2.3549e-10	4.9627e-09	-//-
FBgn0000447	Dihydroorotate dehydrogenase(Dhod)	1397.11	3028.04	-1.1159	3.0774e-12	8.598e-11	sp|P32748|PYRD_DROME Dihydroorotate dehydrogenase (quinone), mitochondrial OS=Drosophila melanogaster OX=7227 GN=Dhod PE=2 SV=2//0
FBgn0085390	Diacyl glycerol kinase(Dgk)	783.55	1698.63	-1.1163	8.5175e-12	2.2393e-10	sp|Q01583|DGK1_DROME Diacylglycerol kinase 1 OS=Drosophila melanogaster OX=7227 GN=Dgk PE=2 SV=5//0
FBgn0030661	CG8105 gene product from transcript CG8105-RA(CG8105)	332.339	720.516	-1.1164	4.8692e-08	7.086e-07	sp|Q92058|PPBT_CHICK Alkaline phosphatase, tissue-nonspecific isozyme OS=Gallus gallus OX=9031 GN=ALPL PE=2 SV=1//2.87935e-102
FBgn0029657	CG12535 gene product from transcript CG12535-RF(CG12535)	84.5165	183.315	-1.117	8.2745e-07	9.7286e-06	-//-
FBgn0051627	CG31627 gene product from transcript CG31627-RB(CG31627)	196.954	427.379	-1.1177	2.74e-09	4.9876e-08	-//-
FBgn0033933	CG10104 gene product from transcript CG10104-RA(CG10104)	67.1171	145.709	-1.1183	3.1895e-06	3.3651e-05	sp|Q03168|ASPP_AEDAE Lysosomal aspartic protease OS=Aedes aegypti OX=7159 GN=AAEL006169 PE=1 SV=2//1.04679e-141
FBgn0261706	ncRNA(CR42742)	47.1925	102.472	-1.1186	3.1422e-05	0.00026397	sp|P35035|TRY1_ANOGA Trypsin-1 OS=Anopheles gambiae OX=7165 GN=TRYP1 PE=2 SV=3//1.30315e-24
FBgn0028901	CG18109 gene product from transcript CG18109-RA(CG18109)	479.608	1042.09	-1.1196	2.6057e-07	3.3244e-06	sp|Q9XYP8|GCP3_DROME Gamma-tubulin complex component 3 OS=Drosophila melanogaster OX=7227 GN=Grip91 PE=1 SV=2//1.37381e-15
FBgn0038952	CG7069 gene product from transcript CG7069-RA(CG7069)	1020	2220.03	-1.122	3.4043e-12	9.4455e-11	sp|O62619|KPYK_DROME Pyruvate kinase OS=Drosophila melanogaster OX=7227 GN=PyK PE=2 SV=2//2.60503e-177
FBgn0051912	ncRNA(CR31912)	108.548	236.387	-1.1228	1.2332e-07	1.6619e-06	-//-
FBgn0036186	CG6071 gene product from transcript CG6071-RA(CG6071)	937.121	2041.05	-1.123	3.3978e-12	9.4439e-11	sp|Q6Q4G3|AMPQ_HUMAN Aminopeptidase Q OS=Homo sapiens OX=9606 GN=LVRN PE=1 SV=4//1.05318e-54
FBgn0033644	Trehalose transporter 1-2(Tret1-2)	129.217	281.597	-1.1238	3.4907e-08	5.227e-07	sp|Q8MKK4|TRE12_DROME Facilitated trehalose transporter Tret1-2 homolog OS=Drosophila melanogaster OX=7227 GN=Tret1-2 PE=2 SV=1//0
FBgn0035497	CG14995 gene product from transcript CG14995-RA(CG14995)	5217.78	11372.9	-1.1241	4.5472e-13	1.4132e-11	sp|Q8C6G1|CU002_MOUSE Protein C21orf2 homolog OS=Mus musculus OX=10090 PE=1 SV=1//4.35227e-40
FBgn0035954	Dorsocross3(Doc3)	24.5572	53.5355	-1.1244	0.0010746	0.006011	sp|O73718|TBX3_CHICK T-box transcription factor TBX3 (Fragment) OS=Gallus gallus OX=9031 GN=TBX3 PE=2 SV=1//8.70695e-76
FBgn0038921	CG6332 gene product from transcript CG6332-RA(CG6332)	4449.24	9702.09	-1.1247	1.0029e-10	2.2183e-09	-//-
FBgn0030840	presidents-cup(p-cup)	455.307	993.769	-1.1261	3.6708e-11	8.6444e-10	-//-
FBgn0038233	HTRA2-related serine protease(HtrA2)	436.063	952.072	-1.1265	4.5686e-11	1.068e-09	sp|Q9VFJ3|HTRA2_DROME Serine protease HTRA2, mitochondrial OS=Drosophila melanogaster OX=7227 GN=HtrA2 PE=1 SV=1//0
FBgn0266216	ncRNA(CR44911)	136.757	298.863	-1.1279	1.9864e-08	3.1079e-07	-//-
FBgn0283712		603.952	1319.85	-1.1279	1.1888e-11	3.0358e-10	sp|Q8IR79|LIMK1_DROME LIM domain kinase 1 OS=Drosophila melanogaster OX=7227 GN=LIMK1 PE=1 SV=1//0
FBgn0032219	CG4995 gene product from transcript CG4995-RB(CG4995)	1729.61	3780.52	-1.1281	1.2757e-12	3.7198e-11	sp|Q08DK7|MCATL_BOVIN Mitochondrial basic amino acids transporter OS=Bos taurus OX=9913 GN=SLC25A29 PE=2 SV=1//4.19106e-77
FBgn0034513	CG13423 gene product from transcript CG13423-RA(CG13423)	33.1683	72.5008	-1.1282	0.00022749	0.0015466	sp|P87362|BLMH_CHICK Bleomycin hydrolase OS=Gallus gallus OX=9031 GN=BLMH PE=1 SV=1//6.15271e-77
FBgn0030539	CG1368 gene product from transcript CG1368-RA(CG1368)	16.6398	36.3917	-1.129	0.005317	0.023574	-//-
FBgn0024191	septin interacting protein 1(sip1)	212.475	465.145	-1.1304	1.2787e-09	2.4268e-08	sp|Q9Y103|TFP11_DROME Septin-interacting protein 1 OS=Drosophila melanogaster OX=7227 GN=sip1 PE=1 SV=1//0
FBgn0038685	CG14282 gene product from transcript CG14282-RA(CG14282)	505.265	1106.34	-1.1307	1.8606e-11	4.5976e-10	-//-
FBgn0040391	CG2854 gene product from transcript CG2854-RA(CG2854)	693.317	1518.59	-1.1311	2.6182e-09	4.7931e-08	sp|Q66JZ4|TCAIM_MOUSE T-cell activation inhibitor, mitochondrial OS=Mus musculus OX=10090 GN=TCAIM PE=1 SV=1//6.04679e-24
FBgn0032867	CG15475 gene product from transcript CG15475-RA(CG15475)	679.442	1489.19	-1.1321	6.3529e-12	1.7009e-10	-//-
FBgn0265174	Phosphatidylinositol glycan anchor biosynthesis, class V ortholog (H. sapiens)(PIG-V)	432.511	947.941	-1.1321	8.4327e-11	1.8888e-09	sp|Q9V7W1|PIGV_DROME GPI mannosyltransferase 2 OS=Drosophila melanogaster OX=7227 GN=PIG-V PE=1 SV=1//0
FBgn0031844	CG13771 gene product from transcript CG13771-RA(CG13771)	61.3401	134.483	-1.1325	0.0024729	0.012343	sp|Q32MW3|ACO10_MOUSE Acyl-coenzyme A thioesterase 10, mitochondrial OS=Mus musculus OX=10090 GN=Acot10 PE=2 SV=1//6.9698e-44
FBgn0265264	CG17097 gene product from transcript CG17097-RB(CG17097)	21284	46665.1	-1.1326	1.4928e-08	2.3844e-07	sp|O46107|LIP1_DROME Lipase 1 OS=Drosophila melanogaster OX=7227 GN=Lip1 PE=2 SV=2//6.37551e-75
FBgn0038558	CG12347 gene product from transcript CG12347-RA(CG12347)	254.535	558.408	-1.1335	5.2994e-10	1.065e-08	-//-
FBgn0050460	CG30460 gene product from transcript CG30460-RE(CG30460)	1129.99	2479.98	-1.134	1.7347e-08	2.7408e-07	sp|Q7SXT7|ZC21A_DANRE Zinc finger C2HC domain-containing protein 1A OS=Danio rerio OX=7955 GN=zc2hc1a PE=2 SV=1//1.87593e-08
FBgn0052983	CG32983 gene product from transcript CG32983-RA(CG32983)	57.6388	126.546	-1.1345	0.00047946	0.0029745	-//-
FBgn0266708	Centrosomal protein 89kDa homolog(Cep89)	130.952	287.51	-1.1346	2.4584e-08	3.7837e-07	sp|Q7JVA5|CEP89_DROME Protein Cep89 homolog OS=Drosophila melanogaster OX=7227 GN=Cep89 PE=2 SV=1//0
FBgn0083938	CG34102 gene product from transcript CG34102-RB(BG642163)	2565.49	5633.13	-1.1347	3.8846e-11	9.1345e-10	-//-
FBgn0266709	ZMYND10 homolog(Zmynd10)	162.546	356.897	-1.1347	8.4703e-09	1.4239e-07	sp|Q9VU41|ZMY10_DROME Zinc finger MYND domain-containing protein 10 homolog OS=Drosophila melanogaster OX=7227 GN=Zmynd10 PE=1 SV=1//0
FBgn0039598	aquarius(aqrs)	1243.13	2729.89	-1.1349	1.0048e-12	2.9513e-11	sp|Q8BJR6|PRS27_MOUSE Serine protease 27 OS=Mus musculus OX=10090 GN=Prss27 PE=2 SV=1//4.24729e-08
FBgn0039161	CG13606 gene product from transcript CG13606-RD(CG13606)	33.5324	73.7221	-1.1365	0.00037127	0.0023883	-//-
FBgn0262167	anastral spindle 1(ana1)	249.874	549.704	-1.1375	0.00020183	0.001397	-//-
FBgn0265302	ncRNA(CR44275)	54.4421	119.77	-1.1375	1.0569e-05	0.0001	sp|Q26263|DPN_DROME Protein deadpan OS=Drosophila melanogaster OX=7227 GN=dpn PE=1 SV=2//0
FBgn0036723	CG12229 gene product from transcript CG12229-RA(CG12229)	2718.1	5983.22	-1.1383	4.8545e-13	1.4971e-11	sp|O62619|KPYK_DROME Pyruvate kinase OS=Drosophila melanogaster OX=7227 GN=PyK PE=2 SV=2//9.2607e-08
FBgn0037944	CG6923 gene product from transcript CG6923-RA(CG6923)	304.087	669.416	-1.1384	1.3661e-06	1.5428e-05	sp|Q6NRV8|R111B_XENLA E3 ubiquitin-protein ligase arkadia-B OS=Xenopus laevis OX=8355 GN=rnf111-b PE=2 SV=1//8.8172e-24
FBgn0267676	ncRNA(CR46012)	78.8758	173.682	-1.1388	7.6971e-07	9.0964e-06	sp|Q07417|ACADS_MOUSE Short-chain specific acyl-CoA dehydrogenase, mitochondrial OS=Mus musculus OX=10090 GN=Acads PE=1 SV=2//1.40154e-12
FBgn0035645	CG5592 gene product from transcript CG5592-RA(CG5592)	13.888	30.6222	-1.1407	0.0093706	0.038122	sp|Q6A4L0|S22AD_MOUSE Solute carrier family 22 member 13 OS=Mus musculus OX=10090 GN=Slc22a13 PE=1 SV=3//8.67516e-63
FBgn0015571	alpha-Esterase-3(alpha-Est3)	1488.76	3282.91	-1.1409	9.4897e-13	2.7975e-11	sp|P16854|EST1_CULPI Esterase B1 OS=Culex pipiens OX=7175 GN=B1 PE=3 SV=1//5.92346e-18
FBgn0032967	CG1428 gene product from transcript CG1428-RA(CG1428)	77.8673	171.75	-1.1412	5.8544e-07	7.038e-06	-//-
FBgn0051752	CG31752 gene product from transcript CG31752-RB(CG31752)	91.7619	202.391	-1.1412	2.3391e-07	3.0154e-06	-//-
FBgn0266155	ncRNA(CR44861)	21.6268	47.7155	-1.1416	0.0015946	0.0084588	-//-
FBgn0032843	CG10730 gene product from transcript CG10730-RC(CG10730)	312.936	690.447	-1.1417	8.3811e-11	1.8798e-09	-//-
FBgn0046873	PFTAIRE-interacting factor 2(Pif2)	570.453	1258.99	-1.1421	7.6135e-12	2.0148e-10	-//-
FBgn0085480	CG34451 gene product from transcript CG34451-RC(CG34451)	17.0355	37.6064	-1.1424	0.0039733	0.018512	sp|Q0VC84|C1GLT_BOVIN Glycoprotein-N-acetylgalactosamine 3-beta-galactosyltransferase 1 OS=Bos taurus OX=9913 GN=C1GALT1 PE=2 SV=1//1.06461e-18
FBgn0032271	CG7329 gene product from transcript CG7329-RB(CG7329)	241.176	532.433	-1.1425	3.7335e-10	7.6565e-09	sp|O46107|LIP1_DROME Lipase 1 OS=Drosophila melanogaster OX=7227 GN=Lip1 PE=2 SV=2//2.34338e-98
FBgn0034962	CG3167 gene product from transcript CG3167-RC(MAN1)	388.997	859.977	-1.1445	1.5236e-07	2.0278e-06	sp|Q7JRE4|MAN1_DROME Inner nuclear membrane protein Man1 OS=Drosophila melanogaster OX=7227 GN=MAN1 PE=1 SV=1//0
FBgn0034659	CG4021 gene product from transcript CG4021-RA(CG4021)	182.77	404.536	-1.1462	1.4123e-09	2.6647e-08	sp|Q08BJ2|KHDR2_DANRE KH domain-containing, RNA-binding, signal transduction-associated protein 2 OS=Danio rerio OX=7955 GN=khdrbs2 PE=2 SV=1//8.02981e-42
FBgn0263333	ncRNA(CR43414)	29.8231	66.096	-1.1481	0.00029855	0.0019695	-//-
FBgn0051347	CG31347 gene product from transcript CG31347-RA(CG31347)	637.71	1413.43	-1.1482	4.4211e-12	1.2079e-10	-//-
FBgn0033602	Cuticular protein 47Ee(Cpr47Ee)	37.371	82.8289	-1.1482	6.954e-05	0.00054189	sp|Q7M4F3|CUD2_SCHGR Endocuticle structural glycoprotein SgAbd-2 OS=Schistocerca gregaria OX=7010 PE=1 SV=1//1.6343e-23
FBgn0047334	CG33943 gene product from transcript CG33943-RB(BG642312)	8480.06	18804.2	-1.1489	9.9038e-14	3.3367e-12	-//-
FBgn0001216	Heat shock protein cognate 1(Hsc70-1)	2128.53	4719.82	-1.1489	3.9123e-13	1.2254e-11	sp|P29843|HSP7A_DROME Heat shock 70 kDa protein cognate 1 OS=Drosophila melanogaster OX=7227 GN=Hsc70-1 PE=1 SV=1//4.464e-35
FBgn0040345	CG3708 gene product from transcript CG3708-RB(CG3708)	427.568	948.18	-1.149	1.8699e-11	4.6135e-10	sp|Q78ZA7|NP1L4_MOUSE Nucleosome assembly protein 1-like 4 OS=Mus musculus OX=10090 GN=Nap1l4 PE=1 SV=1//4.20004e-56
FBgn0051677	CG31677 gene product from transcript CG31677-RA(CG31677)	49.2464	109.216	-1.1491	1.3352e-05	0.00012306	-//-
FBgn0028410	CG5182 gene product from transcript CG5182-RA(Pk34A)	23.9115	53.0326	-1.1492	0.00084752	0.0048683	sp|P18265|GSK3A_RAT Glycogen synthase kinase-3 alpha OS=Rattus norvegicus OX=10116 GN=Gsk3a PE=1 SV=1//3.58405e-68
FBgn0042627	Fatty acid synthase 2(FASN2)	2098.93	4656.09	-1.1495	4.8761e-10	9.8859e-09	sp|P12785|FAS_RAT Fatty acid synthase OS=Rattus norvegicus OX=10116 GN=Fasn PE=1 SV=3//0
FBgn0038200	CG9920 gene product from transcript CG9920-RA(CG9920)	4032.73	8948.4	-1.1499	1.7462e-13	5.7033e-12	sp|Q5DC69|CH10_SCHJA 10 kDa heat shock protein, mitochondrial OS=Schistosoma japonicum OX=6182 GN=SJCHGC01960 PE=3 SV=2//1.44973e-25
FBgn0033369	CG8197 gene product from transcript CG8197-RB(CG8197)	465.841	1033.77	-1.15	1.2581e-11	3.1925e-10	sp|Q647I9|NALP5_BOVIN NACHT, LRR and PYD domains-containing protein 5 OS=Bos taurus OX=9913 GN=NLRP5 PE=2 SV=1//2.95956e-09
FBgn0025612	CG3062 gene product from transcript CG3062-RA(CG3062)	89.1162	198.115	-1.1526	1.8839e-07	2.4703e-06	sp|Q9W4I5|FLTOP_DROME Protein Flattop homolog OS=Drosophila melanogaster OX=7227 GN=CG3062 PE=2 SV=2//1.33044e-160
FBgn0085489	CG34460 gene product from transcript CG34460-RA(CG34460)	131.753	293.199	-1.154	1.1327e-08	1.865e-07	-//-
FBgn0261015	PFTAIRE-interacting factor 1A(Pif1A)	327.853	729.619	-1.1541	4.7332e-11	1.0985e-09	sp|Q3SWS9|JKIP1_RAT Janus kinase and microtubule-interacting protein 1 OS=Rattus norvegicus OX=10116 GN=Jakmip1 PE=1 SV=1//1.48679e-06
FBgn0266416	ncRNA(CR45056)	252.579	562.509	-1.1551	1.9235e-10	4.1294e-09	-//-
FBgn0025360	CG18455 gene product from transcript CG18455-RC(Optix)	94.6761	210.986	-1.1561	1.0087e-07	1.3874e-06	sp|Q95RW8|OPTIX_DROME Protein Optix OS=Drosophila melanogaster OX=7227 GN=Optix PE=2 SV=1//0
FBgn0265878	ncRNA(CR44667)	17.2745	38.539	-1.1577	0.0037496	0.017629	-//-
FBgn0039796	CG12069 gene product from transcript CG12069-RA(CG12069)	551.921	1231.45	-1.1578	4.2428e-12	1.1631e-10	sp|P16911|KDC1_DROME Protein kinase DC1 OS=Drosophila melanogaster OX=7227 GN=Pka-C2 PE=2 SV=2//1.71226e-147
FBgn0051797	CG31797 gene product from transcript CG31797-RA(CG31797)	335.866	750.488	-1.1599	2.8418e-11	6.8532e-10	-//-
FBgn0032965	CG11629 gene product from transcript CG11629-RA(CG11629)	132.031	295.28	-1.1612	8.7452e-09	1.4655e-07	-//-
FBgn0003943	Ubiquitin-63E(Ubi-p63E)	8849.98	19795.8	-1.1614	8.8521e-14	3.014e-12	sp|P0CG69|UBIQP_DROME Polyubiquitin OS=Drosophila melanogaster OX=7227 GN=Ubi-p63E PE=3 SV=1//0
FBgn0040892	CG14634 gene product from transcript CG14634-RB(CG14634)	23.0268	51.5104	-1.1615	0.00094313	0.0053464	-//-
FBgn0031191	CG14617 gene product from transcript CG14617-RD(Cp110)	370.976	830.453	-1.1626	1.8819e-11	4.6361e-10	sp|O43303|CP110_HUMAN Centriolar coiled-coil protein of 110 kDa OS=Homo sapiens OX=9606 GN=CCP110 PE=1 SV=3//6.14512e-07
FBgn0031132	CG15450 gene product from transcript CG15450-RA(CG15450)	306.907	687.345	-1.1632	5.0395e-11	1.1578e-09	sp|Q53EU6|GPAT3_HUMAN Glycerol-3-phosphate acyltransferase 3 OS=Homo sapiens OX=9606 GN=GPAT3 PE=1 SV=2//1.15714e-94
FBgn0267554	ncRNA(CR45894)	71.1439	159.329	-1.1632	0.0015256	0.008147	sp|P70684|PGDH_CAVPO 15-hydroxyprostaglandin dehydrogenase [NAD(+)] OS=Cavia porcellus OX=10141 GN=HPGD PE=2 SV=1//3.01716e-18
FBgn0032749	PH domain leucine-rich repeat protein phosphatase(Phlpp)	15.2179	34.0807	-1.1632	0.0058315	0.025482	sp|Q9VJ07|PHLPP_DROME Protein phosphatase PHLPP-like protein OS=Drosophila melanogaster OX=7227 GN=Phlpp PE=4 SV=1//0
FBgn0262543	ncRNA(CR43097)	72.9887	163.604	-1.1645	7.1326e-07	8.4604e-06	-//-
FBgn0033845	CG17064 gene product from transcript CG17064-RD(mars)	282.466	633.326	-1.1649	0.00048804	0.003023	sp|Q7K3L1|MARS_DROME Guanylate kinase-associated protein mars OS=Drosophila melanogaster OX=7227 GN=mars PE=1 SV=1//0
FBgn0259167	CG42272 gene product from transcript CG42272-RC(CG42272)	164.635	369.265	-1.1654	1.7467e-09	3.2687e-08	sp|P53285|VPS62_YEAST Vacuolar protein sorting-associated protein 62 OS=Saccharomyces cerevisiae (strain ATCC 204508 / S288c) OX=559292 GN=VPS62 PE=1 SV=1//1.65721e-07
FBgn0039873	Sodium-dependent multivitamin transporter(Smvt)	445.807	1000.31	-1.166	6.6469e-07	7.9195e-06	sp|Q8N695|SC5A8_HUMAN Sodium-coupled monocarboxylate transporter 1 OS=Homo sapiens OX=9606 GN=SLC5A8 PE=1 SV=2//4.04015e-95
FBgn0034826	CG13544 gene product from transcript CG13544-RA(CG13544)	991.337	2225.28	-1.1665	5.8804e-13	1.7929e-11	-//-
FBgn0036224	Regulatory particle triple-A ATPase 4-related(Rpt4R)	342.052	768.579	-1.168	1.9417e-11	4.7685e-10	sp|P62334|PRS10_MOUSE 26S proteasome regulatory subunit 10B OS=Mus musculus OX=10090 GN=Psmc6 PE=1 SV=1//0
FBgn0039755	CG15531 gene product from transcript CG15531-RA(CG15531)	930.339	2091.65	-1.1688	5.5603e-13	1.7083e-11	sp|Q6US81|ACO11_SPOLI Acyl-CoA Delta(11) desaturase OS=Spodoptera littoralis OX=7109 PE=1 SV=1//5.34113e-37
FBgn0033292	CG2110 gene product from transcript CG2110-RA(Cyp4ad1)	75.3999	169.685	-1.1702	3.9481e-07	4.8892e-06	sp|Q9V4T3|C4AD1_DROME Probable cytochrome P450 4ad1 OS=Drosophila melanogaster OX=7227 GN=Cyp4ad1 PE=2 SV=1//0
FBgn0040629	CG18673 gene product from transcript CG18673-RC(CG18673)	50.9403	114.646	-1.1703	6.5077e-06	6.4027e-05	sp|Q10462|CAH5_CAEEL Putative carbonic anhydrase 5 OS=Caenorhabditis elegans OX=6239 GN=cah-5 PE=3 SV=3//4.85445e-33
FBgn0031440	CG15395 gene product from transcript CG15395-RB(CG15395)	141.919	319.459	-1.1706	3.4354e-08	5.1538e-07	-//-
FBgn0038000	CG10014 gene product from transcript CG10014-RA(CG10014)	912.291	2053.94	-1.1708	5.7473e-13	1.7556e-11	-//-
FBgn0036072	CG6628 gene product from transcript CG6628-RA(CG6628)	711.219	1601.44	-1.171	9.1179e-13	2.7079e-11	sp|P35778|VA3_SOLIN Venom allergen 3 OS=Solenopsis invicta OX=13686 PE=1 SV=2//1.42218e-13
FBgn0032730	CG10431 gene product from transcript CG10431-RA(CG10431)	57.2624	129.029	-1.172	8.0876e-06	7.8274e-05	sp|Q6ZMW2|ZN782_HUMAN Zinc finger protein 782 OS=Homo sapiens OX=9606 GN=ZNF782 PE=2 SV=1//4.6576e-06
FBgn0267549	ncRNA(CR45889)	25.5669	57.6398	-1.1728	0.00054037	0.0032963	-//-
FBgn0264307	CG43782 gene product from transcript CG43782-RH(orb2)	4994.05	11271.1	-1.1743	5.4281e-14	1.9387e-12	sp|Q9VSR3|ORB2_DROME Translational regulator orb2 OS=Drosophila melanogaster OX=7227 GN=orb2 PE=1 SV=1//0
FBgn0250827	whipple(whip)	601.411	1357.54	-1.1746	1.6207e-12	4.6881e-11	-//-
FBgn0037782	Niemann-Pick type C-2d(Npc2d)	183.027	413.225	-1.1749	8.6227e-08	1.2045e-06	sp|P61917|NPC2_PANTR NPC intracellular cholesterol transporter 2 OS=Pan troglodytes OX=9598 GN=NPC2 PE=1 SV=1//1.40131e-06
FBgn0038888	Chemosensory protein B 93a(CheB93a)	33.9652	76.7165	-1.1755	0.0036198	0.017139	-//-
FBgn0265038	ncRNA(CR44155)	36.9272	83.4083	-1.1755	5.3364e-05	0.00042556	sp|Q86LG1|PPK28_DROME Pickpocket protein 28 OS=Drosophila melanogaster OX=7227 GN=ppk28 PE=1 SV=2//7.20366e-43
FBgn0052572	CG32572 gene product from transcript CG32572-RA(CG32572)	895.166	2024.62	-1.1774	4.4217e-13	1.3796e-11	-//-
FBgn0031817	CG9531 gene product from transcript CG9531-RA(CG9531)	342.096	774.126	-1.1782	1.4356e-11	3.5973e-10	sp|Q921L7|HEMK1_MOUSE HemK methyltransferase family member 1 OS=Mus musculus OX=10090 GN=Hemk1 PE=2 SV=2//5.56236e-47
FBgn0003132	Protein phosphatase 1 at 13C(Pp1-13C)	358.945	812.798	-1.1791	1.8512e-11	4.5813e-10	sp|Q05547|PP13_DROME Serine/threonine-protein phosphatase alpha-3 isoform OS=Drosophila melanogaster OX=7227 GN=Pp1-13C PE=1 SV=1//0
FBgn0031085	CG9570 gene product from transcript CG9570-RA(CG9570)	901.882	2043.06	-1.1797	3.7245e-13	1.1735e-11	-//-
FBgn0023171	ribonuclease H1(rnh1)	284.983	645.563	-1.1797	3.4943e-11	8.2895e-10	sp|O70338|RNH1_MOUSE Ribonuclease H1 OS=Mus musculus OX=10090 GN=Rnaseh1 PE=2 SV=1//2.30942e-42
FBgn0039788	Regulatory particle triple-A ATPase 6-related(Rpt6R)	470.176	1065.48	-1.1802	2.8237e-12	7.9307e-11	sp|O18413|PRS8_DROME 26S proteasome regulatory subunit 8 OS=Drosophila melanogaster OX=7227 GN=Rpt6 PE=1 SV=2//0
FBgn0266644	ncRNA(CR45151)	101.946	231.064	-1.1805	4.0676e-08	6.0289e-07	sp|Q6PDJ6|FBX42_MOUSE F-box only protein 42 OS=Mus musculus OX=10090 GN=Fbxo42 PE=1 SV=1//4.27181e-73
FBgn0031337	CG14346 gene product from transcript CG14346-RC(CG14346)	235.779	534.678	-1.1812	1.0784e-10	2.369e-09	-//-
FBgn0002673	twine(twe)	326.044	740.507	-1.1834	9.7127e-08	1.3439e-06	sp|Q03019|TWINE_DROME Cdc25-like protein phosphatase twine OS=Drosophila melanogaster OX=7227 GN=twe PE=1 SV=2//0
FBgn0053012	CG33012 gene product from transcript CG33012-RC(CG33012)	11.591	26.3303	-1.1837	0.012236	0.047595	sp|Q6UPR8|ERMP1_RAT Endoplasmic reticulum metallopeptidase 1 OS=Rattus norvegicus OX=10116 GN=Ermp1 PE=1 SV=1//4.68032e-100
FBgn0038357	CG5623 gene product from transcript CG5623-RA(CG5623)	262.23	595.683	-1.1837	4.8779e-11	1.1288e-09	-//-
FBgn0051805	CG31805 gene product from transcript CG31805-RB(CG31805)	207.324	471.074	-1.1841	2.0658e-10	4.4055e-09	-//-
FBgn0038405	CG8927 gene product from transcript CG8927-RB(CG8927)	23.4842	53.375	-1.1845	0.0063658	0.027406	-//-
FBgn0002842	spermatocyte arrest(sa)	36.1578	82.2113	-1.185	0.012158	0.047358	sp|Q28J24|TAF8_XENTR Transcription initiation factor TFIID subunit 8 OS=Xenopus tropicalis OX=8364 GN=taf8 PE=2 SV=1//2.20859e-12
FBgn0003159	CG2841 gene product from transcript CG2841-RD(CG2841)	660.218	1501.44	-1.1853	1.0046e-10	2.2192e-09	-//-
FBgn0043825	CG18284 gene product from transcript CG18284-RC(CG18284)	1848.59	4204.44	-1.1855	4.5089e-14	1.6249e-12	sp|O46107|LIP1_DROME Lipase 1 OS=Drosophila melanogaster OX=7227 GN=Lip1 PE=2 SV=2//8.92035e-78
FBgn0036747	CG6052 gene product from transcript CG6052-RA(CG6052)	12.5829	28.6347	-1.1863	0.0090557	0.037038	sp|Q8R420|ABCA3_MOUSE ATP-binding cassette sub-family A member 3 OS=Mus musculus OX=10090 GN=Abca3 PE=1 SV=3//0
FBgn0262689	ncRNA(CR43159)	40.0855	91.2313	-1.1864	9.2739e-05	0.00069922	sp|Q17061|MRJP4_APIME Major royal jelly protein 4 OS=Apis mellifera OX=7460 GN=MRJP4 PE=1 SV=1//4.69871e-08
FBgn0035455	CG10862 gene product from transcript CG10862-RA(CG10862)	915.821	2084.7	-1.1867	2.5918e-13	8.2799e-12	sp|D3ZDK2|UB2D1_RAT Ubiquitin-conjugating enzyme E2 D1 OS=Rattus norvegicus OX=10116 GN=Ube2d1 PE=1 SV=1//4.85441e-50
FBgn0031952	cell division cycle 14(cdc14)	2080.6	4738.68	-1.1875	6.5471e-14	2.2975e-12	sp|Q6GQT0|CC14A_MOUSE Dual specificity protein phosphatase CDC14A OS=Mus musculus OX=10090 GN=Cdc14a PE=2 SV=2//5.0146e-147
FBgn0034156	CG5348 gene product from transcript CG5348-RC(CG5348)	48.8369	111.293	-1.1883	6.2828e-06	6.2081e-05	sp|Q925Q3|NCLX_MOUSE Mitochondrial sodium/calcium exchanger protein OS=Mus musculus OX=10090 GN=Slc8b1 PE=2 SV=2//1.65929e-29
FBgn0032364	CG4970 gene product from transcript CG4970-RB(CG4970)	483.435	1102.05	-1.1888	1.8798e-12	5.3833e-11	-//-
FBgn0053285	CG33285 gene product from transcript CG33285-RA(CG33285)	352.962	804.672	-1.1889	7.8396e-12	2.0712e-10	-//-
FBgn0265576	CG44403 gene product from transcript CG44403-RA(CG44403)	459.242	1047.12	-1.1891	2.0899e-12	5.9742e-11	-//-
FBgn0030247	CG15208 gene product from transcript CG15208-RB(CG15208)	434.159	990.043	-1.1893	2.82e-12	7.9307e-11	sp|O43822|CU002_HUMAN Protein C21orf2 OS=Homo sapiens OX=9606 GN=C21orf2 PE=1 SV=1//1.25275e-28
FBgn0038577	CG12321 gene product from transcript CG12321-RA(CG12321)	590.012	1345.64	-1.1895	8.4633e-13	2.5369e-11	sp|Q1LXS2|PSMG2_DANRE Proteasome assembly chaperone 2 OS=Danio rerio OX=7955 GN=psmg2 PE=2 SV=1//5.70169e-25
FBgn0050376	CG30376 gene product from transcript CG30376-RA(CG30376)	3922.47	8961.29	-1.1919	2.7954e-14	1.0402e-12	-//-
FBgn0266245	ncRNA(CR44940)	13.6559	31.207	-1.1923	0.0059272	0.025823	-//-
FBgn0036941	CG7335 gene product from transcript CG7335-RA(CG7335)	670.613	1532.91	-1.1927	1.2975e-09	2.4596e-08	sp|Q02974|KHK_RAT Ketohexokinase OS=Rattus norvegicus OX=10116 GN=Khk PE=1 SV=1//7.5154e-27
FBgn0267967	CG8316 gene product from transcript CG8316-RB(corolla)	295.652	675.915	-1.1929	1.7634e-11	4.3777e-10	-//-
FBgn0031849	CG11327 gene product from transcript CG11327-RA(CG11327)	1011.51	2312.61	-1.193	1.3859e-13	4.5636e-12	-//-
FBgn0038345	CG5213 gene product from transcript CG5213-RA(CG5213)	376.598	862.138	-1.1949	1.2446e-09	2.3706e-08	sp|O17310|SXL_MUSDO Sex-lethal homolog OS=Musca domestica OX=7370 GN=SXL PE=2 SV=1//2.37967e-40
FBgn0033737	Nucleoporin 54kD(Nup54)	454.793	1041.38	-1.1952	2.1324e-11	5.213e-10	sp|Q9V6B9|NUP54_DROME Probable nucleoporin Nup54 OS=Drosophila melanogaster OX=7227 GN=Nup54 PE=2 SV=1//2.01548e-24
FBgn0051088	CG31088 gene product from transcript CG31088-RA(CG31088)	147.111	336.965	-1.1957	1.2537e-09	2.3851e-08	sp|Q6NRD3|SH3R1_XENLA E3 ubiquitin-protein ligase SH3RF1 OS=Xenopus laevis OX=8355 GN=sh3rf1 PE=1 SV=1//9.94869e-06
FBgn0035741	Bardet-Biedl syndrome 1 ortholog (H. sapiens)(BBS1)	17.3185	39.675	-1.1959	0.0023165	0.011697	sp|Q3V3N7|BBS1_MOUSE Bardet-Biedl syndrome 1 protein homolog OS=Mus musculus OX=10090 GN=Bbs1 PE=1 SV=1//5.65327e-78
FBgn0028941	CG16853 gene product from transcript CG16853-RA(CG16853)	425.722	975.329	-1.196	3.1675e-12	8.8191e-11	-//-
FBgn0264305	CG43783 gene product from transcript CG43783-RG(CG43783)	1148.41	2631.99	-1.1965	1.0715e-13	3.58e-12	sp|Q9VSR3|ORB2_DROME Translational regulator orb2 OS=Drosophila melanogaster OX=7227 GN=orb2 PE=1 SV=1//6.04114e-36
FBgn0033141	CG12831 gene product from transcript CG12831-RC(CG12831)	420.594	964.298	-1.1971	2.6679e-12	7.5327e-11	-//-
FBgn0260991	Inner centromere protein(Incenp)	159.671	366.158	-1.1974	0.00073845	0.0043411	sp|Q9NQS7|INCE_HUMAN Inner centromere protein OS=Homo sapiens OX=9606 GN=INCENP PE=1 SV=3//5.16265e-08
FBgn0265295	ncRNA(pncr014:3L)	113.704	260.929	-1.1984	8.4398e-09	1.4217e-07	sp|P30038|AL4A1_HUMAN Delta-1-pyrroline-5-carboxylate dehydrogenase, mitochondrial OS=Homo sapiens OX=9606 GN=ALDH4A1 PE=1 SV=3//4.65054e-117
FBgn0004379	Kinesin-like protein at 67A(Klp67A)	144.44	331.879	-1.2002	0.00017624	0.0012446	sp|Q91WD7|KI18A_MOUSE Kinesin-like protein KIF18A OS=Mus musculus OX=10090 GN=Kif18a PE=2 SV=1//6.83461e-112
FBgn0035008	CG3494 gene product from transcript CG3494-RA(CG3494)	1439.13	3310.2	-1.2017	5.6562e-14	2.0157e-12	sp|Q7SXW3|LRC40_DANRE Leucine-rich repeat-containing protein 40 OS=Danio rerio OX=7955 GN=lrrc40 PE=2 SV=1//1.86181e-08
FBgn0035782	CG14835 gene product from transcript CG14835-RA(CG14835)	545.051	1255.61	-1.2039	6.0328e-13	1.8323e-11	-//-
FBgn0037664	CG8420 gene product from transcript CG8420-RB(CG8420)	936.229	2156.85	-1.204	1.0252e-13	3.4322e-12	-//-
FBgn0267190	ncRNA(CR45630)	23.9156	55.1	-1.2041	0.0004307	0.0027193	-//-
FBgn0261996	CG42814 gene product from transcript CG42814-RA(CG42814)	174.513	402.279	-1.2049	3.0632e-10	6.3716e-09	sp|Q05B60|NUD14_BOVIN Uridine diphosphate glucose pyrophosphatase OS=Bos taurus OX=9913 GN=NUDT14 PE=2 SV=1//3.60771e-35
FBgn0069973	CG40485 gene product from transcript CG40485-RB(CG40485)	157.786	363.805	-1.2052	8.0727e-05	0.00061678	sp|D2WKD9|SDR1_AEDAE Farnesol dehydrogenase OS=Aedes aegypti OX=7159 GN=SDR-1 PE=1 SV=2//2.6273e-81
FBgn0050293	CG30293 gene product from transcript CG30293-RA(Cht12)	1883.24	4348.54	-1.2073	2.9116e-14	1.0784e-12	sp|Q95M17|CHIA_BOVIN Acidic mammalian chitinase OS=Bos taurus OX=9913 GN=CHIA PE=1 SV=1//4.36998e-53
FBgn0033294	Maltase A4(Mal-A4)	233.764	539.853	-1.2075	3.2296e-11	7.6958e-10	sp|P07192|MAL3_DROME Maltase A3 OS=Drosophila melanogaster OX=7227 GN=Mal-A3 PE=2 SV=2//0
FBgn0259794	sina homologue(sinah)	2694.07	6224.09	-1.2081	1.8189e-14	7.0287e-13	sp|Q8T3Y0|SINAL_DROME Probable E3 ubiquitin-protein ligase sinah OS=Drosophila melanogaster OX=7227 GN=sinah PE=1 SV=2//0
FBgn0050048	CG30048 gene product from transcript CG30048-RD(CG30048)	60.9554	140.846	-1.2083	0.00022361	0.001524	sp|B8UU59|PK1L_ACRMI Polycystic kidney disease 1-related protein (Fragment) OS=Acropora millepora OX=45264 PE=1 SV=1//1.36385e-10
FBgn0030900	Holes in muscle(Him)	20.1829	46.7131	-1.2107	0.0028257	0.013832	-//-
FBgn0030620	CG5662 gene product from transcript CG5662-RB(CG5662)	266.953	617.951	-1.2109	1.7258e-11	4.2975e-10	sp|Q2L969|MTX2_PIG Metaxin-2 OS=Sus scrofa OX=9823 GN=MTX2 PE=2 SV=1//1.11489e-46
FBgn0029727	CG6978 gene product from transcript CG6978-RA(CG6978)	22.9774	53.2441	-1.2124	0.00048102	0.002983	sp|Q9V7S5|PICO_DROME Putative inorganic phosphate cotransporter OS=Drosophila melanogaster OX=7227 GN=Picot PE=2 SV=1//0
FBgn0035316	CG15878 gene product from transcript CG15878-RA(CG15878)	659.505	1528.61	-1.2128	2.3118e-13	7.4298e-12	-//-
FBgn0035875	Cuticular protein 66Cb(Cpr66Cb)	12.9511	30.04	-1.2138	0.0065525	0.02809	sp|P45583|CU19_LOCMI Cuticle protein 19 OS=Locusta migratoria OX=7004 PE=1 SV=1//1.43651e-26
FBgn0033692	washout(wash)	1723.58	3998.11	-1.2139	2.4425e-14	9.2166e-13	sp|Q7JW27|WASH1_DROME WASH complex subunit 1 OS=Drosophila melanogaster OX=7227 GN=wash PE=1 SV=1//0
FBgn0036619	Cuticular protein 72Ec(Cpr72Ec)	49.3027	114.408	-1.2145	3.2875e-06	3.4617e-05	sp|P82119|CUO6_BLACR Cuticle protein 6 OS=Blaberus craniifer OX=6982 PE=1 SV=1//1.70007e-09
FBgn0030814	CG4955 gene product from transcript CG4955-RA(CG4955)	959.45	2227.32	-1.215	7.2956e-14	2.5215e-12	-//-
FBgn0259968	Seminal fluid protein 60F(Sfp60F)	15353.4	35692.6	-1.2171	8.9728e-08	1.2491e-06	-//-
FBgn0267471	ncRNA(CR45821)	110.693	257.375	-1.2173	6.9743e-09	1.1924e-07	-//-
FBgn0022768	Protein phosphatase 2C(Pp2C1)	759.437	1767.74	-1.2189	1.7721e-08	2.7972e-07	sp|O15297|PPM1D_HUMAN Protein phosphatase 1D OS=Homo sapiens OX=9606 GN=PPM1D PE=1 SV=1//2.05279e-72
FBgn0028844	CG15283 gene product from transcript CG15283-RB(CG15283)	197.424	459.855	-1.2199	6.6215e-11	1.502e-09	sp|Q9VLU6|SDHF4_DROME Succinate dehydrogenase assembly factor 4, mitochondrial OS=Drosophila melanogaster OX=7227 GN=Sirup PE=3 SV=2//3.62029e-23
FBgn0028379	farinelli(fan)	1240.11	2888.74	-1.22	2.8875e-14	1.0719e-12	sp|Q9Z270|VAPA_RAT Vesicle-associated membrane protein-associated protein A OS=Rattus norvegicus OX=10116 GN=Vapa PE=1 SV=3//4.79807e-20
FBgn0061469	Ubiquitin protein ligase E3A(Ube3a)	733.706	1709.75	-1.2205	6.161e-10	1.2243e-08	sp|Q05086|UBE3A_HUMAN Ubiquitin-protein ligase E3A OS=Homo sapiens OX=9606 GN=UBE3A PE=1 SV=4//0
FBgn0036950	CG6996 gene product from transcript CG6996-RC(CG6996)	148.155	345.332	-1.2209	5.9901e-10	1.1933e-08	sp|P91745|PE48A_LUCCU Peritrophin-48 OS=Lucilia cuprina OX=7375 PE=1 SV=1//2.56405e-15
FBgn0050412	CG30412 gene product from transcript CG30412-RA(CG30412)	999.609	2330.13	-1.221	4.5014e-14	1.6249e-12	-//-
FBgn0034554	CG15227 gene product from transcript CG15227-RB(CG15227)	35.1672	82.0211	-1.2218	3.422e-05	0.00028508	sp|P43166|CAH7_HUMAN Carbonic anhydrase 7 OS=Homo sapiens OX=9606 GN=CA7 PE=1 SV=1//7.15597e-08
FBgn0261112	beta-Amyloid precursor protein binding protein 1(APP-BP1)	755.202	1761.93	-1.2222	9.773e-14	3.2996e-12	sp|Q9VTE9|ULA1_DROME Nedd8-activating enzyme E1 regulatory subunit OS=Drosophila melanogaster OX=7227 GN=APP-BP1 PE=1 SV=1//0
FBgn0038181	CG9297 gene product from transcript CG9297-RC(CG9297)	4680.22	10919.9	-1.2223	3.3428e-15	1.445e-13	sp|Q90577|SRCA_CHICK Sarcalumenin OS=Gallus gallus OX=9031 GN=SRL PE=2 SV=1//7.7915e-118
FBgn0035924	CG6576 gene product from transcript CG6576-RA(CG6576)	360.722	842.381	-1.2236	1.7207e-12	4.9542e-11	sp|Q94547|RGA_DROME Regulator of gene activity OS=Drosophila melanogaster OX=7227 GN=Rga PE=1 SV=2//6.20668e-14
FBgn0035151	CG17129 gene product from transcript CG17129-RC(CG17129)	51.6655	120.662	-1.2237	0.0026949	0.01329	-//-
FBgn0042710	CG32849 gene product from transcript CG32849-RA(Hex-t2)	2329.52	5440.81	-1.2238	1.5179e-13	4.9883e-12	sp|Q9NFT7|HXK2_DROME Hexokinase type 2 OS=Drosophila melanogaster OX=7227 GN=Hex-t2 PE=2 SV=4//0
FBgn0038683	CG11779 gene product from transcript CG11779-RB(CG11779)	1048.67	2450.06	-1.2243	9.7104e-14	3.2853e-12	sp|O43615|TIM44_HUMAN Mitochondrial import inner membrane translocase subunit TIM44 OS=Homo sapiens OX=9606 GN=TIMM44 PE=1 SV=2//4.95582e-146
FBgn0036705	CG13723 gene product from transcript CG13723-RA(CG13723)	101.49	237.171	-1.2246	8.0921e-09	1.3675e-07	-//-
FBgn0045842	yuri gagarin(yuri)	1565.85	3661.86	-1.2256	1.5314e-14	6.0047e-13	-//-
FBgn0036868	male sterile (3) 76Ba(ms(3)76Ba)	26.8088	62.7692	-1.2273	0.0016141	0.0085346	-//-
FBgn0265825	ncRNA(CR44614)	13.3069	31.1814	-1.2285	0.0054007	0.023893	-//-
FBgn0039805	Cuticular protein 100A(Cpr100A)	33.9419	79.5677	-1.2291	3.7995e-05	0.00031328	-//-
FBgn0032483	CG15482 gene product from transcript CG15482-RA(CG15482)	473.314	1109.85	-1.2295	3.8188e-13	1.1985e-11	-//-
FBgn0026189	CG7740 gene product from transcript CG7740-RD(prominin-like)	1020.78	2393.58	-1.2295	2.1073e-10	4.4703e-09	sp|P82295|PROML_DROME Prominin-like protein OS=Drosophila melanogaster OX=7227 GN=prominin-like PE=1 SV=1//0
FBgn0264301	CG43779 gene product from transcript CG43779-RA(CG43779)	53.8129	126.199	-1.2297	1.2665e-06	1.4404e-05	-//-
FBgn0051848	CG31848 gene product from transcript CG31848-RB(CG31848)	26.2099	61.4865	-1.2302	0.00020811	0.0014324	-//-
FBgn0266684	ncRNA(CR45174)	15.2426	35.7714	-1.2307	0.0030939	0.014981	-//-
FBgn0266372	ncRNA(CR45016)	24.99	58.7015	-1.232	0.00024059	0.0016273	-//-
FBgn0024366	CG11409 gene product from transcript CG11409-RC(CG11409)	18.5907	43.6902	-1.2327	0.001181	0.0065141	-//-
FBgn0052081	CG32081 gene product from transcript CG32081-RA(CG32081)	962.78	2262.71	-1.2328	2.6769e-14	1.0029e-12	sp|Q4V5R4|POLYP_DROME Glutamate transporter polyphemus OS=Drosophila melanogaster OX=7227 GN=polyph PE=2 SV=1//2.59523e-99
FBgn0265458	ncRNA(CR44358)	62.4089	146.819	-1.2342	3.4364e-07	4.3054e-06	sp|P13368|7LESS_DROME Protein sevenless OS=Drosophila melanogaster OX=7227 GN=sev PE=1 SV=2//1.81567e-10
FBgn0000046	Actin 87E(Act87E)	1778.92	4188.15	-1.2353	5.45e-15	2.2584e-13	sp|P10981|ACT5_DROME Actin-87E OS=Drosophila melanogaster OX=7227 GN=Act87E PE=1 SV=1//0
FBgn0033286	CG2127 gene product from transcript CG2127-RB(CG2127)	7335.41	17288.8	-1.2369	2.0309e-15	9.0722e-14	-//-
FBgn0034195	Serpin 53F(Spn53F)	74.5001	175.602	-1.237	7.1821e-08	1.0184e-06	sp|Q7YTY6|SP42D_DROME Serine protease inhibitor 42Dd OS=Drosophila melanogaster OX=7227 GN=Spn42Dd PE=2 SV=1//1.28657e-36
FBgn0032265	CG18301 gene product from transcript CG18301-RA(CG18301)	253.477	597.962	-1.2382	5.5641e-12	1.4947e-10	sp|O46107|LIP1_DROME Lipase 1 OS=Drosophila melanogaster OX=7227 GN=Lip1 PE=2 SV=2//7.41758e-87
FBgn0031142	ryder cup(r-cup)	523.201	1234.25	-1.2382	1.7687e-13	5.7652e-12	-//-
FBgn0033344	CG8252 gene product from transcript CG8252-RA(CG8252)	235.189	554.842	-1.2383	1.1279e-11	2.8896e-10	-//-
FBgn0003545	subito(sub)	295.759	698.024	-1.2389	2.8245e-10	5.898e-09	sp|Q9V877|SUB_DROME Kinesin-like protein subito OS=Drosophila melanogaster OX=7227 GN=sub PE=1 SV=1//0
FBgn0040063	yippee interacting protein 3(yip3)	29.5428	69.7271	-1.2389	7.8021e-05	0.00059895	-//-
FBgn0085494	Male-specific pseudogene 77Y 16(Mst77Y-16Psi)	28.2349	66.678	-1.2397	0.00012033	0.00088315	sp|P16909|18C_DROME Histone-like protein 18C OS=Drosophila melanogaster OX=7227 GN=Mst77F PE=2 SV=1//6.12333e-116
FBgn0250904	CG34434 gene product from transcript CG34434-RB(CG34434)	120.533	284.83	-1.2407	0.0024996	0.012465	-//-
FBgn0053234	CG33234 gene product from transcript CG33234-RD(CG33234)	265.283	627.087	-1.2411	3.9235e-12	1.0793e-10	sp|P30638|SVOP_CAEEL Putative transporter svop-1 OS=Caenorhabditis elegans OX=6239 GN=svop-1 PE=3 SV=5//1.23533e-21
FBgn0264477	CG43885 gene product from transcript CG43885-RA(CG43885)	44.979	106.324	-1.2411	4.6388e-06	4.7144e-05	-//-
FBgn0013688	12S ribosomal RNA(srRNA)	81.9463	193.751	-1.2415	0.0036794	0.017365	-//-
FBgn0263829	CG34334 gene product from transcript CG34334-RA(CG34334)	26.894	63.6185	-1.2422	0.0045335	0.020631	sp|Q3KPW1|RNP1B_XENLA RNA-binding protein with serine-rich domain 1-B OS=Xenopus laevis OX=8355 GN=rnps1-b PE=2 SV=1//1.01958e-19
FBgn0265748	ncRNA(CR44555)	27.5906	65.2688	-1.2422	0.00011692	0.00086172	-//-
FBgn0034816	CG3085 gene product from transcript CG3085-RB(CG3085)	3021.36	7149.11	-1.2426	2.8722e-15	1.2517e-13	sp|Q4R5V1|TEKT2_MACFA Tektin-2 OS=Macaca fascicularis OX=9541 GN=TEKT2 PE=2 SV=1//1.88895e-52
FBgn0267780	ncRNA(CR46111)	119.07	281.749	-1.2426	1.5558e-09	2.9217e-08	-//-
FBgn0029717	CG12684 gene product from transcript CG12684-RA(CG12684)	221.792	524.867	-1.2427	1.3061e-11	3.3038e-10	-//-
FBgn0011281	Odorant-binding protein 83a(Obp83a)	497.098	1176.72	-1.2432	0.00037423	0.0024045	sp|P54193|OB83A_DROME General odorant-binding protein 83a OS=Drosophila melanogaster OX=7227 GN=Obp83a PE=1 SV=1//2.61425e-90
FBgn0032723	short spindle 3(ssp3)	326.553	773.014	-1.2432	8.2161e-09	1.387e-07	sp|Q9BY12|SCAPE_HUMAN S phase cyclin A-associated protein in the endoplasmic reticulum OS=Homo sapiens OX=9606 GN=SCAPER PE=1 SV=2//3.22503e-20
FBgn0036710	CG6479 gene product from transcript CG6479-RC(CG6479)	168.625	399.393	-1.244	5.5328e-06	5.5215e-05	sp|Q6GPP7|TM209_XENLA Transmembrane protein 209 OS=Xenopus laevis OX=8355 GN=tmem209 PE=2 SV=1//1.68616e-45
FBgn0020377	Scavenger receptor class C, type II(Sr-CII)	52.0062	123.183	-1.244	1.2721e-06	1.4438e-05	sp|B3EWZ6|MLRP2_ACRMI MAM and LDL-receptor class A domain-containing protein 2 (Fragment) OS=Acropora millepora OX=45264 PE=1 SV=1//6.70275e-06
FBgn0037924	CG14712 gene product from transcript CG14712-RA(CG14712)	653.046	1547.31	-1.2445	3.1253e-10	6.4756e-09	-//-
FBgn0267062	ncRNA(CR45506)	19.8449	47.042	-1.2452	0.00078168	0.0045485	-//-
FBgn0037292	CG2022 gene product from transcript CG2022-RB(CG2022)	260.431	617.591	-1.2457	4.1964e-12	1.1524e-10	sp|Q99MS3|MP17L_MOUSE Mpv17-like protein OS=Mus musculus OX=10090 GN=Mpv17l PE=1 SV=2//1.4381e-17
FBgn0267802	ncRNA(CR46127)	41.7203	98.9319	-1.2457	6.985e-06	6.8429e-05	-//-
FBgn0030936	CG6481 gene product from transcript CG6481-RA(CG6481)	1264.53	2999.54	-1.2461	8.4289e-15	3.4049e-13	-//-
FBgn0264993	ncRNA(CR44144)	32.1145	76.1729	-1.2461	4.4316e-05	0.00035891	sp|O13742|VPH1_SCHPO V-type proton ATPase subunit a OS=Schizosaccharomyces pombe (strain 972 / ATCC 24843) OX=284812 GN=vph1 PE=3 SV=2//7.15245e-14
FBgn0028513	CG9254 gene product from transcript CG9254-RA(CG9254)	4077.09	9673.04	-1.2464	2.0736e-10	4.4162e-09	sp|Q9V7S5|PICO_DROME Putative inorganic phosphate cotransporter OS=Drosophila melanogaster OX=7227 GN=Picot PE=2 SV=1//2.69754e-103
FBgn0039659	CG14506 gene product from transcript CG14506-RB(CG14506)	18.5274	43.9615	-1.2466	0.0010501	0.0058884	-//-
FBgn0014127	barren(barr)	220.867	524.497	-1.2478	1.4927e-05	0.00013609	sp|O13067|CND2_XENLA Condensin complex subunit 2 OS=Xenopus laevis OX=8355 GN=ncaph PE=1 SV=1//2.4411e-28
FBgn0038450	CG17560 gene product from transcript CG17560-RA(CG17560)	950.864	2260.03	-1.249	1.2014e-14	4.7929e-13	sp|Q8MS59|WAT_DROME Fatty acyl-CoA reductase wat OS=Drosophila melanogaster OX=7227 GN=wat PE=1 SV=1//1.23909e-121
FBgn0030462	CG15742 gene product from transcript CG15742-RC(CG15742)	278.068	660.998	-1.2492	2.1405e-12	6.1081e-11	-//-
FBgn0030307	CG33235 gene product from transcript CG33235-RA(CG33235)	29.1183	69.2727	-1.2504	0.0073978	0.031139	-//-
FBgn0033767	CG13148 gene product from transcript CG13148-RC(CG13148)	88.9816	212.015	-1.2526	1.2624e-08	2.0616e-07	-//-
FBgn0046793	CG32236 gene product from transcript CG32236-RA(CG32236)	648.84	1546.46	-1.253	3.6002e-14	1.3182e-12	-//-
FBgn0032503	CG16825 gene product from transcript CG16825-RB(CG16825)	450.388	1073.89	-1.2536	1.5688e-13	5.145e-12	-//-
FBgn0034099	CG15708 gene product from transcript CG15708-RA(CG15708)	393.138	937.712	-1.2541	3.0832e-13	9.791e-12	-//-
FBgn0052351	Sperm-Leucylaminopeptidase 2(S-Lap2)	12369.9	29536.4	-1.2557	7.0824e-11	1.6042e-09	sp|Q68FS4|AMPL_RAT Cytosol aminopeptidase OS=Rattus norvegicus OX=10116 GN=Lap3 PE=1 SV=1//1.09948e-128
FBgn0032968	CG11634 gene product from transcript CG11634-RB(CG11634)	223.949	535.438	-1.2575	6.8561e-12	1.8204e-10	-//-
FBgn0026563	CG1979 gene product from transcript CG1979-RA(CG1979)	1701.2	4067.31	-1.2575	2.3272e-15	1.031e-13	-//-
FBgn0036520	CG13449 gene product from transcript CG13449-RA(CG13449)	178.367	426.979	-1.2593	3.0245e-11	7.2286e-10	-//-
FBgn0033918	CG8531 gene product from transcript CG8531-RA(CG8531)	1244.7	2979.88	-1.2595	4.8124e-15	2.0363e-13	sp|Q5U458|DJC11_MOUSE DnaJ homolog subfamily C member 11 OS=Mus musculus OX=10090 GN=Dnajc11 PE=1 SV=2//1.82318e-134
FBgn0031423	CG3557 gene product from transcript CG3557-RC(CG3557)	367.404	879.652	-1.2596	3.5009e-13	1.1052e-11	-//-
FBgn0046225	CG17230 gene product from transcript CG17230-RA(CG17230)	1121.35	2686.23	-1.2603	5.8367e-15	2.4062e-13	-//-
FBgn0265855	ncRNA(CR44644)	33.1711	79.4582	-1.2603	2.6723e-05	0.0002283	-//-
FBgn0038311	CG14864 gene product from transcript CG14864-RB(CG14864)	214.513	513.876	-1.2604	8.8165e-12	2.2977e-10	-//-
FBgn0040670	enhancer of yellow 2b(e(y)2b)	207.891	498.453	-1.2616	1.0016e-11	2.5865e-10	sp|Q9VI60|ENY2B_DROME Enhancer of yellow 2b transcription factor OS=Drosophila melanogaster OX=7227 GN=e(y)2b PE=1 SV=1//3.60477e-63
FBgn0037781	CG12812 gene product from transcript CG12812-RB(Fancl)	44.1246	105.815	-1.2619	3.0968e-06	3.2759e-05	sp|Q9NW38|FANCL_HUMAN E3 ubiquitin-protein ligase FANCL OS=Homo sapiens OX=9606 GN=FANCL PE=1 SV=2//2.27516e-16
FBgn0267630	ncRNA(CR45968)	63.7264	152.856	-1.2622	1.466e-07	1.9543e-06	sp|Q7TS68|NSUN6_MOUSE Putative methyltransferase NSUN6 OS=Mus musculus OX=10090 GN=Nsun6 PE=2 SV=2//6.63606e-90
FBgn0039083	CG10177 gene product from transcript CG10177-RA(CG10177)	710.225	1704.66	-1.2631	1.5476e-14	6.0535e-13	sp|P25323|MYLKA_DICDI Myosin light chain kinase A OS=Dictyostelium discoideum OX=44689 GN=mlkA PE=1 SV=2//1.39733e-38
FBgn0028979	tiptop(tio)	118.076	283.533	-1.2638	1.253e-05	0.00011629	sp|Q9U3V5|TIPT_DROME Protein tiptop OS=Drosophila melanogaster OX=7227 GN=tio PE=2 SV=2//0
FBgn0040342	CG3706 gene product from transcript CG3706-RA(CG3706)	113.082	271.783	-1.2651	1.0196e-08	1.691e-07	-//-
FBgn0039810	CG15549 gene product from transcript CG15549-RA(CG15549)	335.852	807.525	-1.2657	4.2367e-13	1.3245e-11	-//-
FBgn0037995	CG3809 gene product from transcript CG3809-RA(CG3809)	1043	2507.85	-1.2657	4.6872e-15	1.9886e-13	sp|P55264|ADK_MOUSE Adenosine kinase OS=Mus musculus OX=10090 GN=Adk PE=1 SV=2//1.5502e-85
FBgn0264710	ncRNA(CR43979)	20.5951	49.533	-1.2661	0.00049578	0.0030677	sp|Q9VNZ8|ALS2_DROME Alsin homolog OS=Drosophila melanogaster OX=7227 GN=Als2 PE=1 SV=1//0
FBgn0051281	Transition protein-like 94D(Tpl94D)	1386.29	3334.44	-1.2662	2.2261e-15	9.8892e-14	-//-
FBgn0035437	Striatin interacting protein(Strip)	854.378	2055.49	-1.2665	1.1398e-12	3.3357e-11	sp|Q0P5J8|STRP1_BOVIN Striatin-interacting protein 1 OS=Bos taurus OX=9913 GN=STRIP1 PE=2 SV=1//0
FBgn0032522	CG16848 gene product from transcript CG16848-RA(CG16848)	95.3518	229.649	-1.2681	2.1152e-08	3.2838e-07	sp|Q5RCH4|FAD1_PONAB FAD synthase OS=Pongo abelii OX=9601 GN=FLAD1 PE=2 SV=1//1.89775e-50
FBgn0036206	CG5964 gene product from transcript CG5964-RA(CG5964)	56.199	135.352	-1.2681	4.1161e-05	0.00033593	-//-
FBgn0039518	CG13978 gene product from transcript CG13978-RA(CG13978)	1270.4	3061.29	-1.2689	2.5799e-15	1.1304e-13	sp|Q9R1S3|PIGN_MOUSE GPI ethanolamine phosphate transferase 1 OS=Mus musculus OX=10090 GN=Pign PE=2 SV=2//5.12653e-65
FBgn0265159	ncRNA(CR44228)	31.9745	77.0679	-1.2692	2.6735e-05	0.0002283	-//-
FBgn0039449	CG6425 gene product from transcript CG6425-RA(CG6425)	41.5567	100.178	-1.2694	0.00093949	0.0053314	-//-
FBgn0034800	CG3788 gene product from transcript CG3788-RB(CG3788)	1225.62	2957.43	-1.2708	2.5424e-15	1.117e-13	sp|P52624|UPP1_MOUSE Uridine phosphorylase 1 OS=Mus musculus OX=10090 GN=Upp1 PE=1 SV=2//4.49257e-94
FBgn0033447	dilatory(dila)	55.585	134.239	-1.272	0.00012343	0.00090344	sp|A1Z7Z9|CP131_DROME Centrosomal protein of 131 kDa OS=Drosophila melanogaster OX=7227 GN=cep131 PE=2 SV=2//0
FBgn0051286	CG31286 gene product from transcript CG31286-RB(CG31286)	898.745	2172.12	-1.2731	5.2859e-15	2.2018e-13	sp|O97069|ASSY_DROME Argininosuccinate synthase OS=Drosophila melanogaster OX=7227 GN=Ass PE=2 SV=1//0
FBgn0029724	CG15472 gene product from transcript CG15472-RA(CG15472)	92.0382	222.499	-1.2735	0.00028427	0.0018893	-//-
FBgn0033603	Cuticular protein 47Ef(Cpr47Ef)	114.407	276.81	-1.2747	7.1502e-09	1.2199e-07	sp|Q7M4F3|CUD2_SCHGR Endocuticle structural glycoprotein SgAbd-2 OS=Schistocerca gregaria OX=7010 PE=1 SV=1//2.03393e-23
FBgn0031163	CG14579 gene product from transcript CG14579-RA(CG14579)	207.464	502.106	-1.2751	4.9015e-12	1.3323e-10	-//-
FBgn0032294	Vacuolar H[+] ATPase 16kD subunit 5(Vha16-5)	45.7759	110.783	-1.2751	1.6225e-06	1.8132e-05	sp|O16110|VATL_AEDAE V-type proton ATPase 16 kDa proteolipid subunit OS=Aedes aegypti OX=7159 GN=AAEL000291 PE=2 SV=2//9.46281e-39
FBgn0039343	CG5111 gene product from transcript CG5111-RA(CG5111)	243.635	589.718	-1.2753	1.7507e-12	5.0315e-11	sp|Q9Y5A7|NUB1_HUMAN NEDD8 ultimate buster 1 OS=Homo sapiens OX=9606 GN=NUB1 PE=1 SV=2//4.64536e-46
FBgn0051343	CG31343 gene product from transcript CG31343-RA(CG31343)	1133.35	2744.37	-1.2759	5.0541e-09	8.8197e-08	sp|P91885|AMPN_MANSE Aminopeptidase N OS=Manduca sexta OX=7130 GN=APN2 PE=1 SV=2//3.01615e-124
FBgn0264372	ncRNA(CR43824)	25.7537	62.3681	-1.276	0.0013479	0.0073074	-//-
FBgn0250862	CG42237 gene product from transcript CG42237-RB(CG42237)	71.2455	172.618	-1.2767	1.4516e-05	0.00013257	sp|I7GQA7|PA2_XYLAI Phospholipase A(2) OS=Xylocopa appendiculata circumvolans OX=135722 GN=PLA2 PE=1 SV=1//1.41186e-19
FBgn0266757	misfire(mfr)	45.4614	110.172	-1.2771	0.00052173	0.0032033	sp|Q2WGJ9|FR1L6_HUMAN Fer-1-like protein 6 OS=Homo sapiens OX=9606 GN=FER1L6 PE=2 SV=2//8.8758e-08
FBgn0000256	cappuccino(capu)	1552.67	3763.27	-1.2772	5.025e-12	1.3589e-10	sp|Q24120|CAPU_DROME Protein cappuccino OS=Drosophila melanogaster OX=7227 GN=capu PE=1 SV=2//0
FBgn0038488	mann-cup(m-cup)	1370.29	3325.03	-1.2789	1.7778e-15	8.0085e-14	sp|Q2T9K6|FEM1C_XENLA Protein fem-1 homolog C OS=Xenopus laevis OX=8355 GN=fem1c PE=2 SV=1//1.58583e-80
FBgn0039809	CG15547 gene product from transcript CG15547-RA(CG15547)	379.444	920.816	-1.279	1.1479e-13	3.8192e-12	sp|P56597|NDK5_HUMAN Nucleoside diphosphate kinase homolog 5 OS=Homo sapiens OX=9606 GN=NME5 PE=1 SV=1//3.35625e-10
FBgn0050110	CG30110 gene product from transcript CG30110-RA(CG30110)	141.774	344.106	-1.2793	8.8175e-11	1.9695e-09	-//-
FBgn0037115	CG11249 gene product from transcript CG11249-RA(CG11249)	631.622	1533.38	-1.2796	1.2619e-14	5.0215e-13	-//-
FBgn0263022	CG43317 gene product from transcript CG43317-RA(CG43317)	66.3105	161.042	-1.2801	1.0234e-05	9.723e-05	-//-
FBgn0002715	meiotic from via Salaria 332(mei-S332)	284.457	691.148	-1.2808	5.6476e-13	1.7317e-11	sp|Q24141|SGO1_DROME Shugoshin OS=Drosophila melanogaster OX=7227 GN=mei-S332 PE=1 SV=1//0
FBgn0033774	CG12374 gene product from transcript CG12374-RA(CG12374)	4635.48	11264.2	-1.281	1.8912e-16	1.0043e-14	sp|O02350|CBPA1_ANOGA Zinc carboxypeptidase A 1 OS=Anopheles gambiae OX=7165 GN=AGAP009593 PE=2 SV=3//5.13592e-83
FBgn0037580	Dipeptidyl aminopeptidase III(DppIII)	2704.48	6574.29	-1.2815	4.6792e-16	2.3019e-14	sp|Q9VHR8|DPP3_DROME Dipeptidyl peptidase 3 OS=Drosophila melanogaster OX=7227 GN=DppIII PE=2 SV=2//0
FBgn0031392	Apoptosis inducing factor(AIF)	812.644	1975.64	-1.2816	6.0629e-09	1.0457e-07	sp|Q9VQ79|AIFM1_DROME Putative apoptosis-inducing factor 1, mitochondrial OS=Drosophila melanogaster OX=7227 GN=AIF PE=2 SV=2//0
FBgn0265102	Outer segment 1(Oseg1)	113.397	275.85	-1.2825	3.886e-06	4.0311e-05	sp|A8WGF4|IF122_XENTR Intraflagellar transport protein 122 homolog OS=Xenopus tropicalis OX=8364 GN=ift122 PE=2 SV=1//0
FBgn0050156	CG30156 gene product from transcript CG30156-RB(CG30156)	962.963	2343.13	-1.2829	2.6238e-15	1.1465e-13	sp|Q9QYI4|DJB12_MOUSE DnaJ homolog subfamily B member 12 OS=Mus musculus OX=10090 GN=Dnajb12 PE=1 SV=2//6.00469e-27
FBgn0035204	CG2277 gene product from transcript CG2277-RB(CG2277)	2056.24	5010.05	-1.2848	6.1812e-13	1.8703e-11	sp|Q5TFE4|NT5D1_HUMAN 5&apos;-nucleotidase domain-containing protein 1 OS=Homo sapiens OX=9606 GN=NT5DC1 PE=1 SV=1//7.84333e-53
FBgn0037900	CG5276 gene product from transcript CG5276-RA(CG5276)	555.983	1354.75	-1.2849	7.4142e-13	2.2308e-11	sp|Q8K4Y7|CANT1_RAT Soluble calcium-activated nucleotidase 1 OS=Rattus norvegicus OX=10116 GN=Cant1 PE=1 SV=1//2.02965e-109
FBgn0037005	CG5078 gene product from transcript CG5078-RA(CG5078)	23.9472	58.357	-1.285	0.00015026	0.0010816	sp|P70187|MF14A_MOUSE Hippocampus abundant transcript 1 protein OS=Mus musculus OX=10090 GN=Mfsd14a PE=2 SV=3//1.71427e-117
FBgn0036159	CG7557 gene product from transcript CG7557-RA(CG7557)	1055.94	2573.54	-1.2852	1.7398e-15	7.8594e-14	-//-
FBgn0262943	ncRNA(CR43262)	13.3207	32.476	-1.2857	0.0031616	0.015263	-//-
FBgn0029667	Growth arrest specific protein 8(Gas8)	171.741	418.755	-1.2859	1.6603e-11	4.1408e-10	sp|Q8MT08|DRC4_DROME Dynein regulatory complex subunit 4 OS=Drosophila melanogaster OX=7227 GN=Gas8 PE=2 SV=1//0
FBgn0263377	ncRNA(CR43429)	34.8334	84.9573	-1.2863	1.2476e-05	0.00011592	sp|Q8K2V6|IPO11_MOUSE Importin-11 OS=Mus musculus OX=10090 GN=Ipo11 PE=1 SV=1//8.10846e-06
FBgn0262598	mitoshell(mtsh)	97.1654	237.014	-1.2865	1.8807e-09	3.503e-08	sp|Q9VLP4|MTSH_DROME Protein mitoshell OS=Drosophila melanogaster OX=7227 GN=mtsh PE=4 SV=2//0
FBgn0015600	toucan(toc)	1941.34	4735.64	-1.2865	4.8421e-16	2.3603e-14	-//-
FBgn0035955	CG5194 gene product from transcript CG5194-RB(CG5194)	63.1823	154.188	-1.2871	0.0010472	0.0058741	-//-
FBgn0035855	CG7366 gene product from transcript CG7366-RA(CG7366)	514.099	1255	-1.2876	1.751e-14	6.7993e-13	-//-
FBgn0259876	Chromosome associated protein G(Cap-G)	271.602	663.166	-1.2879	1.8161e-05	0.000161	sp|Q9BPX3|CND3_HUMAN Condensin complex subunit 3 OS=Homo sapiens OX=9606 GN=NCAPG PE=1 SV=1//6.64827e-52
FBgn0085464	CG34435 gene product from transcript CG34435-RA(CG34435)	163.766	399.897	-1.288	3.193e-10	6.5902e-09	sp|P54357|MLC2_DROME Myosin-2 essential light chain OS=Drosophila melanogaster OX=7227 GN=Mlc-c PE=1 SV=1//1.869e-11
FBgn0052719	CG32719 gene product from transcript CG32719-RA(CG32719)	191.978	468.961	-1.2885	5.5494e-12	1.4932e-10	-//-
FBgn0051013	CG31013 gene product from transcript CG31013-RA(CG31013)	132.587	323.927	-1.2887	4.2149e-09	7.428e-08	sp|Q20065|P4HA2_CAEEL Prolyl 4-hydroxylase subunit alpha-2 OS=Caenorhabditis elegans OX=6239 GN=phy-2 PE=1 SV=1//6.49109e-69
FBgn0243511	phagocyte signaling impaired(psidin)	704.626	1722.83	-1.2898	4.5166e-13	1.4065e-11	sp|Q9VDQ7|NAA25_DROME Phagocyte signaling-impaired protein OS=Drosophila melanogaster OX=7227 GN=psidin PE=2 SV=1//0
FBgn0051682	Testis EndoG-Like 1(Tengl1)	296.012	723.719	-1.2898	2.882e-13	9.1704e-12	sp|O08600|NUCG_MOUSE Endonuclease G, mitochondrial OS=Mus musculus OX=10090 GN=Endog PE=1 SV=1//1.12791e-19
FBgn0038598	CG7131 gene product from transcript CG7131-RA(CG7131)	1741.88	4261.09	-1.2906	4.7651e-16	2.3369e-14	-//-
FBgn0038167	Lkb1 kinase(Lkb1)	722.59	1767.62	-1.2906	1.4202e-11	3.5698e-10	sp|Q15831|STK11_HUMAN Serine/threonine-protein kinase STK11 OS=Homo sapiens OX=9606 GN=STK11 PE=1 SV=1//7.2366e-135
FBgn0031171	CG1801 gene product from transcript CG1801-RC(CG1801)	402.136	985.976	-1.2939	4.11e-14	1.4879e-12	sp|E9PU17|ABCAH_RAT ATP-binding cassette sub-family A member 17 OS=Rattus norvegicus OX=10116 GN=Abca17 PE=2 SV=1//8.15057e-77
FBgn0050350	CG30350 gene product from transcript CG30350-RA(CG30350)	1253.73	3074.96	-1.2943	2.8973e-15	1.2559e-13	-//-
FBgn0038892	CG15498 gene product from transcript CG15498-RA(CG15498)	515.877	1265.41	-1.2945	1.286e-14	5.0923e-13	sp|Q6P656|CF161_HUMAN Cilia- and flagella-associated protein 161 OS=Homo sapiens OX=9606 GN=CFAP161 PE=2 SV=1//1.85159e-21
FBgn0033706	Vacuolar H[+] ATPase 36kD subunit 2(Vha36-2)	744.345	1826.01	-1.2946	1.9191e-14	7.3638e-13	sp|Q5RCS8|VATD_PONAB V-type proton ATPase subunit D OS=Pongo abelii OX=9601 GN=ATP6V1D PE=2 SV=1//4.73103e-42
FBgn0034062	CG8388 gene product from transcript CG8388-RA(CG8388)	143.664	353.042	-1.2971	4.661e-11	1.0881e-09	sp|Q9U405|GRAU_DROME Transcription factor grauzone OS=Drosophila melanogaster OX=7227 GN=grau PE=1 SV=1//3.89701e-62
FBgn0033442	CG1690 gene product from transcript CG1690-RB(CG1690)	442.376	1087.61	-1.2978	1.7653e-14	6.8382e-13	-//-
FBgn0036222	Succinate dehydrogenase, subunit A (flavoprotein)-like(SdhAL)	818.111	2012.61	-1.2987	2.1058e-15	9.3809e-14	sp|Q94523|SDHA_DROME Succinate dehydrogenase [ubiquinone] flavoprotein subunit, mitochondrial OS=Drosophila melanogaster OX=7227 GN=SdhA PE=2 SV=3//0
FBgn0263078	CG43339 gene product from transcript CG43339-RC(CG43339)	175.397	431.763	-1.2996	8.7787e-12	2.2929e-10	-//-
FBgn0267765	ncRNA(CR46096)	17.9037	44.0764	-1.2997	0.00061406	0.003698	sp|G5EEW6|SIG7_CAEEL Peptidyl-prolyl cis-trans isomerase sig-7 OS=Caenorhabditis elegans OX=6239 GN=sig-7 PE=1 SV=1//1.05772e-124
FBgn0034834	Large Subunit 2(LS2)	36.1344	89.0214	-1.3008	6.8449e-06	6.7138e-05	sp|Q24562|U2AF2_DROME Splicing factor U2AF 50 kDa subunit OS=Drosophila melanogaster OX=7227 GN=U2af50 PE=1 SV=1//4.43874e-143
FBgn0039773	CG2224 gene product from transcript CG2224-RB(CG2224)	443.572	1093.06	-1.3011	1.8848e-14	7.2661e-13	sp|Q6TH47|STBPA_DANRE STAM-binding protein-like A OS=Danio rerio OX=7955 GN=stambpa PE=2 SV=3//8.68647e-97
FBgn0036678	CG11905 gene product from transcript CG11905-RB(CG11905)	59.0842	145.605	-1.3012	1.205e-07	1.6281e-06	-//-
FBgn0035768	CG14834 gene product from transcript CG14834-RA(CG14834)	71.1821	175.433	-1.3013	2.3194e-08	3.5834e-07	-//-
FBgn0032457	CG15483 gene product from transcript CG15483-RA(CG15483)	508.304	1253.2	-1.3019	8.6118e-13	2.567e-11	sp|L7YAI7|B4GA1_DANRE Beta-1,4-glucuronyltransferase 1 OS=Danio rerio OX=7955 GN=b4gat1 PE=2 SV=1//2.04486e-29
FBgn0052568	CG32568 gene product from transcript CG32568-RC(CG32568)	93.6605	231.012	-1.3025	3.5682e-07	4.4463e-06	sp|Q16537|2A5E_HUMAN Serine/threonine-protein phosphatase 2A 56 kDa regulatory subunit epsilon isoform OS=Homo sapiens OX=9606 GN=PPP2R5E PE=1 SV=1//5.44718e-50
FBgn0027376	CG11908 gene product from transcript CG11908-RA(rha)	749.339	1848.52	-1.3027	1.2735e-13	4.211e-12	-//-
FBgn0266972	ncRNA(CR45423)	28.61	70.596	-1.3031	3.1666e-05	0.00026546	-//-
FBgn0029740	CG12680 gene product from transcript CG12680-RC(CG12680)	86.4386	213.327	-1.3033	3.7984e-09	6.7758e-08	-//-
FBgn0029705	CG12693 gene product from transcript CG12693-RB(CG12693)	540.059	1333.31	-1.3038	7.1792e-15	2.9296e-13	-//-
FBgn0032175	CG13131 gene product from transcript CG13131-RA(CG13131)	78.8357	194.654	-1.304	5.8298e-08	8.4001e-07	-//-
FBgn0035036	CG4707 gene product from transcript CG4707-RA(CG4707)	179.654	443.686	-1.3043	1.0195e-07	1.401e-06	sp|Q9U405|GRAU_DROME Transcription factor grauzone OS=Drosophila melanogaster OX=7227 GN=grau PE=1 SV=1//1.70704e-54
FBgn0264378	ncRNA(CR43830)	9.66765	23.8775	-1.3044	0.009665	0.039121	-//-
FBgn0038334	heineken-cup(h-cup)	506.94	1252.19	-1.3046	7.8097e-15	3.1707e-13	sp|Q9VM65|FGOP2_DROME FGFR1 oncogene partner 2 homolog OS=Drosophila melanogaster OX=7227 GN=Fgop2 PE=2 SV=1//1.49293e-10
FBgn0037824	CG14684 gene product from transcript CG14684-RA(CG14684)	81.49	201.582	-1.3067	4.6408e-09	8.1337e-08	-//-
FBgn0051872	CG31872 gene product from transcript CG31872-RB(CG31872)	8688.23	21495.8	-1.3069	4.6894e-12	1.279e-10	sp|O46107|LIP1_DROME Lipase 1 OS=Drosophila melanogaster OX=7227 GN=Lip1 PE=2 SV=2//4.46907e-73
FBgn0052986	CG32986 gene product from transcript CG32986-RA(CG32986)	70.3634	174.124	-1.3072	2.0175e-08	3.1474e-07	-//-
FBgn0037040	CG12983 gene product from transcript CG12983-RE(CG12983)	1360.93	3368.89	-1.3077	3.0218e-16	1.5532e-14	sp|Q8T880|AXP83_CIOIN Axonemal 84 kDa protein OS=Ciona intestinalis OX=7719 GN=AXP83.9 PE=2 SV=1//1.21266e-09
FBgn0286051		2711.5	6714.46	-1.3082	1.1145e-16	6.2149e-15	sp|Q2T9U5|REXO5_BOVIN RNA exonuclease 5 OS=Bos taurus OX=9913 GN=REXO5 PE=2 SV=1//3.9379e-48
FBgn0033440	CG10459 gene product from transcript CG10459-RA(CG10459)	69.5419	172.261	-1.3086	1.6505e-08	2.6234e-07	sp|Q5XIG8|STRAP_RAT Serine-threonine kinase receptor-associated protein OS=Rattus norvegicus OX=10116 GN=Strap PE=1 SV=1//4.68339e-47
FBgn0266158	ncRNA(CR44864)	31.5335	78.1689	-1.3097	1.7614e-05	0.00015702	-//-
FBgn0264707	Rho guanine nucleotide exchange factor 3(RhoGEF3)	1256.56	3116.42	-1.3104	1.4145e-14	5.5873e-13	sp|Q96N96|SPT13_HUMAN Spermatogenesis-associated protein 13 OS=Homo sapiens OX=9606 GN=SPATA13 PE=1 SV=1//6.60124e-50
FBgn0037987	CG14739 gene product from transcript CG14739-RA(CG14739)	1076.72	2671.04	-1.3108	5.0983e-16	2.4701e-14	sp|P62257|UBE2H_MOUSE Ubiquitin-conjugating enzyme E2 H OS=Mus musculus OX=10090 GN=Ube2h PE=1 SV=1//1.16835e-39
FBgn0037456	CG1138 gene product from transcript CG1138-RA(CG1138)	216.491	537.368	-1.3116	9.4537e-13	2.7921e-11	-//-
FBgn0011279	Odorant-binding protein 69a(Obp69a)	154.794	384.425	-1.3124	9.6215e-12	2.4887e-10	sp|P54191|OB69A_DROME General odorant-binding protein 69a OS=Drosophila melanogaster OX=7227 GN=Obp69a PE=1 SV=2//1.4032e-105
FBgn0038887	CG7907 gene product from transcript CG7907-RB(CG7907)	57.9577	143.996	-1.313	2.7484e-05	0.00023382	sp|Q29G82|NCBP1_DROPS Nuclear cap-binding protein subunit 1 OS=Drosophila pseudoobscura pseudoobscura OX=46245 GN=Cbp80 PE=3 SV=1//1.04646e-136
FBgn0036369	CG10089 gene product from transcript CG10089-RE(CG10089)	1098.83	2731.84	-1.3139	3.6927e-16	1.8681e-14	sp|Q9NRW4|DUS22_HUMAN Dual specificity protein phosphatase 22 OS=Homo sapiens OX=9606 GN=DUSP22 PE=1 SV=1//1.43896e-47
FBgn0003124	CG12306 gene product from transcript CG12306-RA(polo)	337.103	838.216	-1.3141	0.0004615	0.0028854	sp|P52304|POLO_DROME Serine/threonine-protein kinase polo OS=Drosophila melanogaster OX=7227 GN=polo PE=1 SV=2//0
FBgn0032848	nessun dorma(nesd)	187.677	467.225	-1.3159	3.1046e-09	5.6195e-08	sp|Q9VIP0|NESD_DROME Protein nessun dorma OS=Drosophila melanogaster OX=7227 GN=nesd PE=1 SV=1//0
FBgn0000114	arrest(aret)	2552.2	6354.32	-1.316	7.6327e-13	2.2922e-11	sp|Q6P0B1|CELF2_DANRE CUGBP Elav-like family member 2 OS=Danio rerio OX=7955 GN=celf2 PE=2 SV=1//4.29734e-09
FBgn0032593	Transient receptor potential cation channel gamma(Trpgamma)	31.1543	77.5869	-1.3164	1.6379e-05	0.00014748	sp|Q9VJJ7|TRPG_DROME Transient receptor potential-gamma protein OS=Drosophila melanogaster OX=7227 GN=Trpgamma PE=1 SV=2//0
FBgn0037195	CG11226 gene product from transcript CG11226-RA(CG11226)	387.368	965.261	-1.3172	1.9194e-14	7.3638e-13	-//-
FBgn0035999	CG3552 gene product from transcript CG3552-RD(CG3552)	334.221	832.89	-1.3173	3.8186e-14	1.3918e-12	sp|Q8HXE4|GDPP1_MACFA GDP-D-glucose phosphorylase 1 OS=Macaca fascicularis OX=9541 GN=GDPGP1 PE=2 SV=1//1.58313e-37
FBgn0037464	CG1988 gene product from transcript CG1988-RB(CG1988)	882.884	2201.66	-1.3183	4.9945e-16	2.4272e-14	-//-
FBgn0263326	CG43407 gene product from transcript CG43407-RB(CG43407)	39.9648	99.7505	-1.3196	4.0339e-05	0.00033012	-//-
FBgn0261397	dilute class unconventional myosin(didum)	1553.13	3878.99	-1.3205	1.5415e-12	4.4704e-11	sp|Q02440|MYO5A_CHICK Unconventional myosin-Va OS=Gallus gallus OX=9031 GN=MYO5A PE=1 SV=1//0
FBgn0051245	CG31245 gene product from transcript CG31245-RA(CG31245)	493.789	1233.4	-1.3207	3.9652e-15	1.6957e-13	-//-
FBgn0267727	Pendulin(Pen)	6423.68	16045.2	-1.3207	8.6233e-16	4.0201e-14	sp|P52295|IMA_DROME Importin subunit alpha OS=Drosophila melanogaster OX=7227 GN=Pen PE=1 SV=2//0
FBgn0035776	CG8564 gene product from transcript CG8564-RC(CG8564)	4795.99	11983.7	-1.3212	1.6325e-16	8.7561e-15	sp|P04069|CBPB_ASTAS Carboxypeptidase B OS=Astacus astacus OX=6715 PE=1 SV=1//3.11601e-33
FBgn0035047	Painting of fourth(Pof)	2791.22	6975.8	-1.3215	5.1533e-17	3.0496e-15	sp|Q9W123|POF_DROME Protein painting of fourth OS=Drosophila melanogaster OX=7227 GN=Pof PE=1 SV=1//0
FBgn0264824	ncRNA(CR44032)	25.4556	63.6345	-1.3218	6.4099e-05	0.00050464	-//-
FBgn0037764	CG9459 gene product from transcript CG9459-RA(CG9459)	514.343	1285.92	-1.322	3.2118e-14	1.1813e-12	sp|Q9VH58|ELOF_DROME Elongation of very long chain fatty acids protein F OS=Drosophila melanogaster OX=7227 GN=eloF PE=1 SV=1//8.07492e-59
FBgn0250821	CG14644 gene product from transcript CG14644-RA(CG14644)	343.18	858.694	-1.3232	2.6829e-14	1.0029e-12	sp|Q7PPU9|BND7A_ANOGA Band 7 protein AGAP004871 OS=Anopheles gambiae OX=7165 GN=AGAP004871 PE=3 SV=3//3.50763e-61
FBgn0030014	CG15337 gene product from transcript CG15337-RA(CG15337)	293.688	735.346	-1.3241	6.8949e-14	2.4038e-12	-//-
FBgn0040356	CG12498 gene product from transcript CG12498-RA(CG12498)	163.38	409.084	-1.3242	5.7015e-12	1.529e-10	sp|Q9W261|RTF1_DROME RNA polymerase-associated protein Rtf1 OS=Drosophila melanogaster OX=7227 GN=Rtf1 PE=1 SV=1//2.83913e-18
FBgn0031513	CG3347 gene product from transcript CG3347-RB(CG3347)	13.9128	34.8468	-1.3246	0.0024708	0.012339	sp|Q5EA28|CXXC1_BOVIN CXXC-type zinc finger protein 1 OS=Bos taurus OX=9913 GN=CXXC1 PE=2 SV=1//4.32696e-13
FBgn0264515	ncRNA(CR43914)	28.6719	71.8387	-1.3251	7.0579e-05	0.00054911	-//-
FBgn0014395	touch insensitive larva B(tilB)	70.4566	176.597	-1.3257	4.1035e-08	6.0709e-07	sp|Q9VR52|TILB_DROME Protein tilB OS=Drosophila melanogaster OX=7227 GN=tilB PE=1 SV=1//0
FBgn0051910	CG31910 gene product from transcript CG31910-RA(CG31910)	672.323	1685.36	-1.3258	1.0115e-15	4.6478e-14	-//-
FBgn0051933	CG31933 gene product from transcript CG31933-RA(CG31933)	95.7393	240.006	-1.3259	2.1665e-06	2.362e-05	-//-
FBgn0035957	CG5144 gene product from transcript CG5144-RA(CG5144)	568.346	1425.8	-1.3269	1.6814e-15	7.6386e-14	sp|P48610|KARG_DROME Arginine kinase OS=Drosophila melanogaster OX=7227 GN=Argk PE=2 SV=2//5.42859e-164
FBgn0037964	CG14731 gene product from transcript CG14731-RA(CG14731)	19.9439	50.0414	-1.3272	0.00022971	0.00156	-//-
FBgn0037810	slender lobes(sle)	234.95	589.631	-1.3275	0.00081509	0.0046986	sp|Q8INM3|SLE_DROME Protein slender lobes OS=Drosophila melanogaster OX=7227 GN=sle PE=1 SV=1//0
FBgn0069913	CG4681 gene product from transcript CG4681-RA(CG4681)	858.567	2155.05	-1.3277	3.8886e-16	1.9608e-14	sp|Q9D845|TEX9_MOUSE Testis-expressed protein 9 OS=Mus musculus OX=10090 GN=Tex9 PE=2 SV=1//8.12774e-14
FBgn0031644	CG15625 gene product from transcript CG15625-RA(CG15625)	429.183	1077.31	-1.3278	1.1023e-11	2.8284e-10	sp|Q95JY5|SAM15_MACFA Sterile alpha motif domain-containing protein 15 OS=Macaca fascicularis OX=9541 GN=SAMD15 PE=2 SV=2//3.70408e-12
FBgn0037746	CG8478 gene product from transcript CG8478-RB(CG8478)	167.479	420.558	-1.3283	0.0015986	0.0084752	-//-
FBgn0031733	CG14006 gene product from transcript CG14006-RB(CG14006)	283.021	711.801	-1.3306	6.6279e-14	2.3208e-12	-//-
FBgn0264826	ncRNA(CR44034)	16.8967	42.5521	-1.3325	0.00067513	0.0040115	-//-
FBgn0034010	CG8157 gene product from transcript CG8157-RB(CG8157)	17.9683	45.2787	-1.3334	0.004	0.01861	-//-
FBgn0034776	CG13527 gene product from transcript CG13527-RB(CG13527)	117.531	296.275	-1.3339	7.2613e-11	1.6401e-09	sp|P35588|HYPB_HYPLI Hypodermin-B OS=Hypoderma lineatum OX=7389 PE=1 SV=1//3.14779e-21
FBgn0052720	CG32720 gene product from transcript CG32720-RB(CG32720)	134.121	338.244	-1.3345	1.9038e-11	4.6827e-10	-//-
FBgn0265889	ncRNA(CR44678)	17.2828	43.6083	-1.3353	0.00056674	0.0034427	-//-
FBgn0028997	CG8362 gene product from transcript CG8362-RA(nmdyn-D7)	561.429	1417.61	-1.3363	1.1833e-15	5.4063e-14	sp|Q9QXL7|NDK7_RAT Nucleoside diphosphate kinase 7 OS=Rattus norvegicus OX=10116 GN=Nme7 PE=1 SV=1//2.55342e-81
FBgn0036924	hale-bopp(hale)	724.414	1830.51	-1.3374	4.3363e-16	2.1463e-14	-//-
FBgn0030359	CG18130 gene product from transcript CG18130-RA(CG18130)	900.73	2276.6	-1.3377	1.134e-15	5.196e-14	sp|Q86XW9|TXND6_HUMAN Thioredoxin domain-containing protein 6 OS=Homo sapiens OX=9606 GN=NME9 PE=2 SV=1//1.99527e-16
FBgn0086442	mind bomb 2(mib2)	1512.68	3832.8	-1.3413	5.359e-15	2.2265e-13	sp|Q5ZIJ9|MIB2_CHICK E3 ubiquitin-protein ligase MIB2 OS=Gallus gallus OX=9031 GN=MIB2 PE=2 SV=1//2.23057e-21
FBgn0033508	Odorant-binding protein 46a(Obp46a)	14.3208	36.2856	-1.3413	0.0013857	0.0074875	-//-
FBgn0033324	CG14744 gene product from transcript CG14744-RD(CG14744)	59.0691	149.799	-1.3426	4.3519e-08	6.4028e-07	sp|Q925Q3|NCLX_MOUSE Mitochondrial sodium/calcium exchanger protein OS=Mus musculus OX=10090 GN=Slc8b1 PE=2 SV=2//1.90471e-35
FBgn0031861	CG17375 gene product from transcript CG17375-RD(CG17375)	480.032	1217.64	-1.3429	1.9127e-15	8.5682e-14	-//-
FBgn0032375	CG14932 gene product from transcript CG14932-RB(CG14932)	106.235	269.759	-1.3444	1.2953e-10	2.8262e-09	-//-
FBgn0051463	CG31463 gene product from transcript CG31463-RA(CG31463)	56.1072	142.47	-1.3444	6.557e-08	9.347e-07	-//-
FBgn0267246	ncRNA(CR45686)	97.2699	247.076	-1.3449	3.0537e-10	6.36e-09	-//-
FBgn0031235	CG13693 gene product from transcript CG13693-RA(CG13693)	260.723	662.613	-1.3457	5.2188e-14	1.8682e-12	-//-
FBgn0050496	CG30496 gene product from transcript CG30496-RA(CG30496)	219.459	557.87	-1.346	2.5819e-13	8.2648e-12	sp|Q92990|GLMN_HUMAN Glomulin OS=Homo sapiens OX=9606 GN=GLMN PE=1 SV=2//6.36593e-24
FBgn0035943	CG5653 gene product from transcript CG5653-RA(CG5653)	174.344	443.181	-1.346	1.3372e-12	3.8919e-11	sp|Q9SU79|PAO5_ARATH Probable polyamine oxidase 5 OS=Arabidopsis thaliana OX=3702 GN=PAO5 PE=2 SV=1//3.93175e-44
FBgn0010288	Ubiquitin carboxy-terminal hydrolase(Uch)	588.917	1498.52	-1.3474	8.7836e-14	3.0099e-12	sp|P35122|UCHL_DROME Ubiquitin carboxyl-terminal hydrolase OS=Drosophila melanogaster OX=7227 GN=Uch PE=2 SV=2//7.17337e-166
FBgn0033969	CG10202 gene product from transcript CG10202-RA(CG10202)	989.932	2519.06	-1.3475	9.6854e-17	5.508e-15	sp|Q8CAA7|PGM2L_MOUSE Glucose 1,6-bisphosphate synthase OS=Mus musculus OX=10090 GN=Pgm2l1 PE=1 SV=1//0
FBgn0036036	CG14174 gene product from transcript CG14174-RA(CG14174)	99.8938	254.435	-1.3488	2.2511e-10	4.7564e-09	-//-
FBgn0033069	CG8335 gene product from transcript CG8335-RA(CG8335)	108.028	275.187	-1.349	9.1248e-11	2.0352e-09	sp|A1Z6K7|EI3F2_DROME Eukaryotic translation initiation factor 3 subunit F-2 OS=Drosophila melanogaster OX=7227 GN=eIF3f2 PE=3 SV=2//0
FBgn0028579	CG3268 gene product from transcript CG3268-RA(phtf)	735.773	1876.65	-1.3508	8.3729e-11	1.8798e-09	sp|Q9V9A8|PHTF_DROME Putative homeodomain transcription factor OS=Drosophila melanogaster OX=7227 GN=phtf PE=1 SV=2//0
FBgn0039408	CG14551 gene product from transcript CG14551-RA(CG14551)	26.1604	66.7285	-1.3509	3.3598e-05	0.00028034	-//-
FBgn0261561	CG42675 gene product from transcript CG42675-RF(CG42675)	1245.87	3178.99	-1.3514	4.2649e-17	2.5907e-15	sp|Q8CCG1|ZC21C_MOUSE Zinc finger C2HC domain-containing protein 1C OS=Mus musculus OX=10090 GN=Zc2hc1c PE=2 SV=1//4.40955e-30
FBgn0035667	Jonah 65Ai(Jon65Ai)	139.556	356.081	-1.3514	0.0036846	0.017379	sp|C0HKF8|SER2_DROME Serine protease 2 OS=Drosophila melanogaster OX=7227 GN=Jon99Ciii PE=2 SV=1//4.84283e-88
FBgn0015300	Suppressor of Stellate-like(Ssl)	88.1752	225.037	-1.3517	4.9248e-10	9.9595e-09	sp|Q24536|SSL_DROME Suppressor-of-stellate-like protein OS=Drosophila melanogaster OX=7227 GN=Ssl PE=2 SV=1//1.80996e-161
FBgn0035852	CG7387 gene product from transcript CG7387-RA(CG7387)	853.844	2179.78	-1.3521	1.1161e-16	6.2149e-15	sp|Q96EY1|DNJA3_HUMAN DnaJ homolog subfamily A member 3, mitochondrial OS=Homo sapiens OX=9606 GN=DNAJA3 PE=1 SV=2//1.56146e-46
FBgn0053290	CG33290 gene product from transcript CG33290-RA(CG33290)	253.625	647.541	-1.3523	9.1624e-14	3.1065e-12	-//-
FBgn0004174	Male-specific RNA 84Dc(Mst84Dc)	3522.29	8998.91	-1.3532	1.0409e-16	5.8777e-15	-//-
FBgn0051055	CG31055 gene product from transcript CG31055-RB(CG31055)	757.284	1935.48	-1.3538	1.4842e-16	7.9871e-15	-//-
FBgn0030195	CG2898 gene product from transcript CG2898-RA(CG2898)	353.613	904.094	-1.3543	5.7955e-15	2.3954e-13	-//-
FBgn0001311	krotzkopf verkehrt(kkv)	23.8221	60.9192	-1.3546	5.8567e-05	0.00046336	sp|Q8T5G8|CHS_MELAT Chitin synthase OS=Meloidogyne artiellia OX=42426 PE=1 SV=1//1.26951e-11
FBgn0267751	ncRNA(CR46082)	16.9737	43.4417	-1.3558	0.0057744	0.025302	sp|P29274|AA2AR_HUMAN Adenosine receptor A2a OS=Homo sapiens OX=9606 GN=ADORA2A PE=1 SV=2//4.47339e-15
FBgn0263132	CG43374 gene product from transcript CG43374-RK(Cht6)	12.2779	31.444	-1.3567	0.0024056	0.012064	sp|Q13231|CHIT1_HUMAN Chitotriosidase-1 OS=Homo sapiens OX=9606 GN=CHIT1 PE=1 SV=1//3.17412e-101
FBgn0040362	CG11379 gene product from transcript CG11379-RB(CG11379)	314.349	805.11	-1.3568	1.1331e-14	4.5317e-13	-//-
FBgn0053221	pseudo(CR33221)	46.5811	119.368	-1.3576	2.1415e-07	2.7763e-06	sp|Q6ZNG0|ZN620_HUMAN Zinc finger protein 620 OS=Homo sapiens OX=9606 GN=ZNF620 PE=2 SV=1//3.81055e-07
FBgn0037829	CG14691 gene product from transcript CG14691-RA(CG14691)	149.475	383.074	-1.3577	3.5802e-12	9.8705e-11	sp|Q63564|SV2B_RAT Synaptic vesicle glycoprotein 2B OS=Rattus norvegicus OX=10116 GN=Sv2b PE=1 SV=1//8.24684e-25
FBgn0028487	flyers-cup(f-cup)	1456.02	3734.44	-1.3589	2.018e-17	1.2792e-15	sp|Q5ZLN0|LRC40_CHICK Leucine-rich repeat-containing protein 40 OS=Gallus gallus OX=9031 GN=LRRC40 PE=2 SV=1//3.26584e-07
FBgn0028870	CG4691 gene product from transcript CG4691-RA(CG4691)	2725.14	6990.36	-1.359	7.4736e-18	5.0571e-16	-//-
FBgn0038486	CG5265 gene product from transcript CG5265-RA(CG5265)	1049.19	2693.76	-1.3603	4.3322e-17	2.6217e-15	sp|Q704S8|CACP_RAT Carnitine O-acetyltransferase OS=Rattus norvegicus OX=10116 GN=Crat PE=1 SV=1//1.39725e-132
FBgn0035942	CG5660 gene product from transcript CG5660-RB(CG5660)	223.919	575.066	-1.3608	1.0086e-13	3.3908e-12	sp|Q04462|SYVC_RAT Valine--tRNA ligase OS=Rattus norvegicus OX=10116 GN=Vars PE=2 SV=2//0
FBgn0267800	ncRNA(CR46125)	8.3323	21.4027	-1.361	0.010392	0.04158	-//-
FBgn0052110	CG32110 gene product from transcript CG32110-RA(CG32110)	102.882	264.304	-1.3612	9.1739e-11	2.0434e-09	sp|P59110|SENP1_MOUSE Sentrin-specific protease 1 OS=Mus musculus OX=10090 GN=Senp1 PE=1 SV=1//5.37167e-52
FBgn0039124	testis-specifically expressed bromodomain containing protein-1(tbrd-1)	84.2404	216.452	-1.3615	7.726e-06	7.5092e-05	sp|P13709|FSH_DROME Homeotic protein female sterile OS=Drosophila melanogaster OX=7227 GN=fs(1)h PE=1 SV=2//2.22236e-12
FBgn0011239	male sterile (2) 35Ci(ms(2)35Ci)	296.163	761.546	-1.3625	1.0735e-14	4.3147e-13	-//-
FBgn0051798	CG31798 gene product from transcript CG31798-RA(CG31798)	553.209	1424.24	-1.3643	3.4098e-16	1.7305e-14	-//-
FBgn0035262	CG18171 gene product from transcript CG18171-RA(CG18171)	968.043	2492.51	-1.3645	4.5296e-17	2.7252e-15	-//-
FBgn0266282	java no jive(jnj)	414.538	1067.4	-1.3645	8.004e-10	1.5673e-08	sp|Q6P9I7|SMC6_XENLA Structural maintenance of chromosomes protein 6 OS=Xenopus laevis OX=8355 GN=smc6 PE=2 SV=1//1.9935e-92
FBgn0040496	CG17104 gene product from transcript CG17104-RB(CG17104)	60.4361	155.884	-1.367	1.4457e-08	2.3231e-07	-//-
FBgn0265455	CG44355 gene product from transcript CG44355-RA(CG44355)	10.0015	25.8187	-1.3682	0.0051116	0.02284	-//-
FBgn0266303	ncRNA(CR44968)	8.96558	23.1645	-1.3694	0.0080152	0.033232	-//-
FBgn0050391	CG30391 gene product from transcript CG30391-RA(CG30391)	162.656	420.711	-1.371	9.7619e-13	2.8725e-11	-//-
FBgn0267672	ncRNA(CR46008)	17.0204	44.0287	-1.3712	0.00034997	0.0022705	-//-
FBgn0038373	CG4546 gene product from transcript CG4546-RA(CG4546)	4095.9	10596.8	-1.3714	8.3093e-18	5.5441e-16	sp|P91798|KARG_SCHAM Arginine kinase OS=Schistocerca americana OX=7009 GN=ARGK PE=2 SV=1//6.50489e-102
FBgn0032345	CG14921 gene product from transcript CG14921-RA(CG14921)	123.076	318.537	-1.3719	1.1682e-11	2.988e-10	sp|Q8WXU2|DAAF4_HUMAN Dynein assembly factor 4, axonemal OS=Homo sapiens OX=9606 GN=DNAAF4 PE=1 SV=2//2.24378e-06
FBgn0034660	lysyl oxidase-like 2(lox2)	25.6137	66.3027	-1.3722	2.7502e-05	0.00023385	sp|A1L1V4|LOL2B_DANRE Lysyl oxidase homolog 2B OS=Danio rerio OX=7955 GN=loxl2b PE=2 SV=1//1.27564e-23
FBgn0025573	Protein phosphatase N at 58A(PpN58A)	197.139	510.74	-1.3734	2.6346e-11	6.3631e-10	sp|P62137|PP1A_MOUSE Serine/threonine-protein phosphatase PP1-alpha catalytic subunit OS=Mus musculus OX=10090 GN=Ppp1ca PE=1 SV=1//3.06223e-137
FBgn0037986	CG14736 gene product from transcript CG14736-RE(CG14736)	363.028	940.774	-1.3738	1.688e-15	7.6468e-14	sp|Q21190|UNC1_CAEEL Protein unc-1 OS=Caenorhabditis elegans OX=6239 GN=unc-1 PE=3 SV=2//2.93755e-60
FBgn0032525	CG16954 gene product from transcript CG16954-RA(Hsp60D)	1759.8	4561.2	-1.374	8.8461e-14	3.014e-12	sp|O02649|CH60A_DROME Heat shock protein 60A OS=Drosophila melanogaster OX=7227 GN=Hsp60A PE=1 SV=3//5.28664e-133
FBgn0037176	CG14456 gene product from transcript CG14456-RB(CG14456)	62.4584	162.041	-1.3754	7.91e-09	1.3452e-07	-//-
FBgn0039797	CG1340 gene product from transcript CG1340-RC(CG1340)	1023.32	2658.2	-1.3772	1.7389e-17	1.1155e-15	sp|Q15056|IF4H_HUMAN Eukaryotic translation initiation factor 4H OS=Homo sapiens OX=9606 GN=EIF4H PE=1 SV=5//2.41662e-21
FBgn0262972	ncRNA(CR43283)	18.625	48.3809	-1.3772	0.00019961	0.0013852	-//-
FBgn0032176	CG13127 gene product from transcript CG13127-RA(CG13127)	98.4113	255.697	-1.3775	9.6971e-11	2.148e-09	-//-
FBgn0029596	CG14054 gene product from transcript CG14054-RA(CG14054)	111.526	289.759	-1.3775	2.8763e-11	6.9261e-10	-//-
FBgn0033056	CG7856 gene product from transcript CG7856-RA(CG7856)	614.659	1596.96	-1.3775	1.124e-16	6.2371e-15	-//-
FBgn0029726	CG15471 gene product from transcript CG15471-RB(CG15471)	67.595	175.746	-1.3785	6.1798e-07	7.407e-06	-//-
FBgn0052119	CG32119 gene product from transcript CG32119-RA(CG32119)	1698.43	4416.48	-1.3787	5.4053e-18	3.7689e-16	-//-
FBgn0029157	slingshot(ssh)	1010.28	2627.03	-1.3787	3.3561e-13	1.0616e-11	sp|Q6NN85|SSH_DROME Protein phosphatase Slingshot OS=Drosophila melanogaster OX=7227 GN=ssh PE=1 SV=2//0
FBgn0033258	CG8712 gene product from transcript CG8712-RB(CG8712)	289.114	752.04	-1.3792	6.8285e-15	2.8008e-13	-//-
FBgn0040502	CG8343 gene product from transcript CG8343-RA(CG8343)	751.399	1956.62	-1.3807	8.7324e-08	1.2178e-06	sp|P22897|MRC1_HUMAN Macrophage mannose receptor 1 OS=Homo sapiens OX=9606 GN=MRC1 PE=1 SV=1//2.35687e-08
FBgn0051784	CG31784 gene product from transcript CG31784-RC(CG31784)	402.539	1048.62	-1.3813	6.4413e-16	3.0744e-14	-//-
FBgn0051601	CG31601 gene product from transcript CG31601-RC(CG31601)	189.458	493.864	-1.3822	1.3305e-13	4.3905e-12	sp|Q86VM9|ZCH18_HUMAN Zinc finger CCCH domain-containing protein 18 OS=Homo sapiens OX=9606 GN=ZC3H18 PE=1 SV=2//1.06151e-06
FBgn0265085	ncRNA(CR44196)	15.2206	39.6938	-1.3829	0.00063328	0.0037952	-//-
FBgn0283439	CG46281 gene product from transcript CG46281-RA(CG46281)	28.9453	75.6218	-1.3855	8.3337e-05	0.00063461	-//-
FBgn0037751	matotopetli(topi)	102.882	268.944	-1.3863	6.2305e-09	1.0709e-07	sp|Q9VH70|TOPI_DROME Testis-specific zinc finger protein topi OS=Drosophila melanogaster OX=7227 GN=topi PE=1 SV=1//0
FBgn0032055	CG13091 gene product from transcript CG13091-RB(CG13091)	5108.97	13368.6	-1.3877	7.965e-19	6.3868e-17	sp|Q8MS59|WAT_DROME Fatty acyl-CoA reductase wat OS=Drosophila melanogaster OX=7227 GN=wat PE=1 SV=1//2.43727e-123
FBgn0036142	CG7616 gene product from transcript CG7616-RA(CG7616)	591.14	1547.56	-1.3884	7.3056e-17	4.2296e-15	sp|Q80V03|ADCK5_MOUSE Uncharacterized aarF domain-containing protein kinase 5 OS=Mus musculus OX=10090 GN=Adck5 PE=2 SV=2//3.74195e-123
FBgn0036807	CG6893 gene product from transcript CG6893-RB(CG6893)	156.25	409.661	-1.3906	5.6599e-13	1.7322e-11	sp|Q9QZD8|DIC_MOUSE Mitochondrial dicarboxylate carrier OS=Mus musculus OX=10090 GN=Slc25a10 PE=1 SV=2//9.07071e-49
FBgn0028868	CG4701 gene product from transcript CG4701-RA(CG4701)	672.945	1764.91	-1.391	3.4732e-17	2.1423e-15	sp|Q7ZZ25|ATD1A_DANRE ATPase family AAA domain-containing protein 1-A OS=Danio rerio OX=7955 GN=atad1a PE=2 SV=2//6.80195e-120
FBgn0036527	CG7304 gene product from transcript CG7304-RB(CG7304)	105.916	277.981	-1.3921	2.0056e-11	4.9181e-10	sp|Q8IA44|GLT12_DROME Putative polypeptide N-acetylgalactosaminyltransferase 12 OS=Drosophila melanogaster OX=7227 GN=pgant12 PE=2 SV=1//0
FBgn0004197	Serrate(Ser)	74.302	195.016	-1.3921	9.8844e-10	1.9098e-08	sp|P18168|SERR_DROME Protein serrate OS=Drosophila melanogaster OX=7227 GN=Ser PE=1 SV=3//0
FBgn0038448	CG12783 gene product from transcript CG12783-RC(CG12783)	133.934	351.666	-1.3927	2.6634e-12	7.5327e-11	sp|Q02563|SV2A_RAT Synaptic vesicle glycoprotein 2A OS=Rattus norvegicus OX=10116 GN=Sv2a PE=1 SV=2//8.20849e-09
FBgn0036849	CG14079 gene product from transcript CG14079-RA(CG14079)	13.6889	35.9868	-1.3945	0.00098658	0.005573	sp|Q8N4H0|SPA6L_HUMAN Spermatogenesis associated 6-like protein OS=Homo sapiens OX=9606 GN=SPATA6L PE=2 SV=2//1.42328e-07
FBgn0038109	CG11656 gene product from transcript CG11656-RA(CG11656)	403.293	1060.69	-1.3951	3.1465e-16	1.6072e-14	-//-
FBgn0034416	CG15109 gene product from transcript CG15109-RC(CG15109)	2133.34	5616.99	-1.3967	1.361e-18	1.0344e-16	-//-
FBgn0035693	CG8219 gene product from transcript CG8219-RA(CG8219)	215.794	568.847	-1.3984	2.6335e-14	9.8906e-13	sp|Q92973|TNPO1_HUMAN Transportin-1 OS=Homo sapiens OX=9606 GN=TNPO1 PE=1 SV=2//0
FBgn0029660	CG10801 gene product from transcript CG10801-RA(CG10801)	100.476	264.953	-1.3989	3.3821e-11	8.0354e-10	sp|Q5ZI33|KLHL7_CHICK Kelch-like protein 7 OS=Gallus gallus OX=9031 GN=KLHL7 PE=2 SV=1//2.28016e-10
FBgn0051204	CG31204 gene product from transcript CG31204-RA(CG31204)	1007.42	2658.44	-1.3999	5.8876e-18	4.0523e-16	-//-
FBgn0266029	ncRNA(CR44794)	21.2119	56.0426	-1.4016	6.4196e-05	0.000505	-//-
FBgn0032554	CG15278 gene product from transcript CG15278-RC(CG15278)	243.996	644.877	-1.4022	8.0519e-15	3.2608e-13	-//-
FBgn0031265	CG2794 gene product from transcript CG2794-RA(CG2794)	411.203	1087.1	-1.4026	2.4576e-16	1.2797e-14	sp|A7GCK7|PSUG_CLOBL Pseudouridine-5&apos;-phosphate glycosidase OS=Clostridium botulinum (strain Langeland / NCTC 10281 / Type F) OX=441772 GN=psuG PE=3 SV=1//4.94738e-102
FBgn0052774	Mucin 4B(Muc4B)	40.2505	106.43	-1.4028	1.3819e-06	1.5574e-05	-//-
FBgn0038012	CG10013 gene product from transcript CG10013-RA(CG10013)	12.271	32.4659	-1.4037	0.0032282	0.015523	-//-
FBgn0033628	CG13203 gene product from transcript CG13203-RC(CG13203)	38.5483	102.066	-1.4048	4.5101e-07	5.5381e-06	-//-
FBgn0086661	ncRNA(snoRNA:Psi28S-2566)	7.96132	21.0938	-1.4057	0.009376	0.038125	-//-
FBgn0267136	ncRNA(CR45576)	14.2644	37.7991	-1.4059	0.00070197	0.0041464	-//-
FBgn0034175	ste24b prenyl protease type I(ste24b)	353.423	936.536	-1.4059	4.2085e-16	2.096e-14	sp|Q80W54|FACE1_MOUSE CAAX prenyl protease 1 homolog OS=Mus musculus OX=10090 GN=Zmpste24 PE=1 SV=2//4.72833e-57
FBgn0033705	CG13168 gene product from transcript CG13168-RC(CG13168)	1264.78	3352.48	-1.4063	2.2525e-18	1.6495e-16	-//-
FBgn0030429	CG4661 gene product from transcript CG4661-RA(CG4661)	335.525	889.899	-1.4072	5.5288e-16	2.6707e-14	-//-
FBgn0051538	CG31538 gene product from transcript CG31538-RA(CG31538)	7852.47	20831.5	-1.4075	1.3624e-16	7.4314e-15	-//-
FBgn0262020	CG42831 gene product from transcript CG42831-RA(CG42831)	68.0623	180.603	-1.4079	1.3079e-09	2.4763e-08	-//-
FBgn0031545	CG3213 gene product from transcript CG3213-RA(CG3213)	8361.49	22214.5	-1.4097	2.3893e-17	1.4911e-15	-//-
FBgn0026147	CG16833 gene product from transcript CG16833-RM(CG16833)	1558.25	4142.03	-1.4104	6.2481e-14	2.2022e-12	sp|Q80UG8|TTLL4_MOUSE Tubulin polyglutamylase TTLL4 OS=Mus musculus OX=10090 GN=Ttll4 PE=2 SV=3//1.00546e-141
FBgn0032636	CG5043 gene product from transcript CG5043-RA(CG5043)	493.222	1311.39	-1.4108	5.0386e-17	2.9927e-15	-//-
FBgn0037502	walker cup(wa-cup)	627.688	1669.28	-1.4111	1.5947e-17	1.0271e-15	-//-
FBgn0031749	CG14000 gene product from transcript CG14000-RA(CG14000)	164.113	436.973	-1.4129	3.75e-13	1.1792e-11	-//-
FBgn0267149	ncRNA(CR45589)	17.5974	46.8668	-1.4132	0.0001703	0.0012066	-//-
FBgn0039371	CG4960 gene product from transcript CG4960-RB(CG4960)	140.29	373.783	-1.4138	6.3011e-13	1.903e-11	sp|Q5RE33|REEP5_PONAB Receptor expression-enhancing protein 5 OS=Pongo abelii OX=9601 GN=REEP5 PE=2 SV=1//8.05039e-44
FBgn0285943		914.905	2437.74	-1.4138	3.3107e-18	2.3809e-16	sp|Q24251|ATP5H_DROME ATP synthase subunit d, mitochondrial OS=Drosophila melanogaster OX=7227 GN=ATPsynD PE=2 SV=2//1.64049e-19
FBgn0286199		383.959	1023.98	-1.4152	1.8985e-16	1.0048e-14	-//-
FBgn0051320	HEAT repeat containing 2(HEATR2)	191.823	511.748	-1.4157	4.6757e-11	1.0883e-09	sp|Q8INF7|DAAF5_DROME Dynein assembly factor 5, axonemal OS=Drosophila melanogaster OX=7227 GN=HEATR2 PE=2 SV=1//0
FBgn0264369	ncRNA(CR43821)	125.277	334.37	-1.4163	8.635e-12	2.2664e-10	-//-
FBgn0051161	CG31161 gene product from transcript CG31161-RB(CG31161)	725.697	1939.23	-1.418	5.7561e-18	3.9961e-16	-//-
FBgn0003950	uncoordinated(unc)	35.0614	93.6933	-1.4181	2.6993e-05	0.00023038	-//-
FBgn0266202	ncRNA(CR44897)	16.3252	43.6385	-1.4185	0.0033193	0.015908	-//-
FBgn0028838	COP9 signalosome subunit 1a(CSN1a)	297.581	795.814	-1.4191	8.2324e-16	3.8716e-14	sp|Q99LD4|CSN1_MOUSE COP9 signalosome complex subunit 1 OS=Mus musculus OX=10090 GN=Gps1 PE=1 SV=1//6.96625e-73
FBgn0032090	CG9582 gene product from transcript CG9582-RB(CG9582)	310.469	830.771	-1.42	5.575e-16	2.6849e-14	sp|Q9BQT8|ODC_HUMAN Mitochondrial 2-oxodicarboxylate carrier OS=Homo sapiens OX=9606 GN=SLC25A21 PE=1 SV=1//5.40485e-71
FBgn0033610	CG18335 gene product from transcript CG18335-RA(CG18335)	931.122	2492.65	-1.4206	7.2391e-17	4.2063e-15	sp|Q7JRP4|U605_DROME UPF0605 protein CG18335 OS=Drosophila melanogaster OX=7227 GN=CG18335 PE=2 SV=1//0
FBgn0051693	CG31693 gene product from transcript CG31693-RA(CG31693)	430.037	1151.23	-1.4206	7.1875e-17	4.1915e-15	sp|Q62052|P_MOUSE P protein OS=Mus musculus OX=10090 GN=Oca2 PE=1 SV=1//8.59218e-79
FBgn0038565	CG7794 gene product from transcript CG7794-RA(CG7794)	993.355	2659.22	-1.4206	4.0994e-16	2.048e-14	sp|P53372|TBA1_PNECA Tubulin alpha chain OS=Pneumocystis carinii OX=4754 GN=TUB1 PE=3 SV=1//5.19235e-164
FBgn0028892	CG4161 gene product from transcript CG4161-RB(CG4161)	636.577	1709.29	-1.425	8.107e-18	5.4398e-16	sp|Q58EM4|ARMT1_DANRE Protein-glutamate O-methyltransferase OS=Danio rerio OX=7955 GN=armt1 PE=2 SV=1//3.91199e-84
FBgn0031920	CG6441 gene product from transcript CG6441-RA(CG6441)	915.443	2458.95	-1.4255	1.6981e-18	1.2785e-16	-//-
FBgn0261243	Puromycin sensitive aminopeptidase(Psa)	1864.79	5010.58	-1.426	5.0297e-15	2.1115e-13	sp|P55786|PSA_HUMAN Puromycin-sensitive aminopeptidase OS=Homo sapiens OX=9606 GN=NPEPPS PE=1 SV=2//0
FBgn0031476	CG8813 gene product from transcript CG8813-RA(CG8813)	1347.48	3621.67	-1.4264	6.5525e-19	5.3888e-17	-//-
FBgn0262575	CG43115 gene product from transcript CG43115-RA(CG43115)	54.2513	145.83	-1.4266	8.0516e-09	1.3639e-07	-//-
FBgn0032878	CG9316 gene product from transcript CG9316-RA(CG9316)	672.309	1807.21	-1.4266	6.0229e-18	4.1277e-16	sp|Q8NEE6|DRC6_HUMAN Dynein regulatory complex subunit 6 OS=Homo sapiens OX=9606 GN=FBXL13 PE=2 SV=3//4.79982e-06
FBgn0036328	CG10749 gene product from transcript CG10749-RA(CG10749)	403.82	1086.03	-1.4273	7.3569e-17	4.244e-15	sp|Q5NVR2|MDHM_PONAB Malate dehydrogenase, mitochondrial OS=Pongo abelii OX=9601 GN=MDH2 PE=2 SV=1//1.76177e-97
FBgn0034159	CG15615 gene product from transcript CG15615-RB(CG15615)	21.9016	58.9083	-1.4274	3.2523e-05	0.00027194	-//-
FBgn0037291	CG14662 gene product from transcript CG14662-RA(CG14662)	43.4872	117.024	-1.4281	7.8807e-08	1.1077e-06	-//-
FBgn0003886	alpha-Tubulin at 85E(alphaTub85E)	134.631	362.307	-1.4282	6.1467e-13	1.8634e-11	sp|P06604|TBA2_DROME Tubulin alpha-2 chain OS=Drosophila melanogaster OX=7227 GN=alphaTub85E PE=1 SV=1//0
FBgn0266769	ncRNA(CR45234)	50.4415	135.816	-1.429	1.7159e-08	2.7192e-07	-//-
FBgn0031626	CG15631 gene product from transcript CG15631-RB(CG15631)	531.309	1431.08	-1.4295	1.1701e-17	7.6589e-16	-//-
FBgn0033963	CG12857 gene product from transcript CG12857-RB(CG12857)	181.187	488.292	-1.4303	2.4742e-14	9.3142e-13	sp|Q8NFY9|KBTB8_HUMAN Kelch repeat and BTB domain-containing protein 8 OS=Homo sapiens OX=9606 GN=KBTBD8 PE=1 SV=2//2.38741e-10
FBgn0034502	CG13871 gene product from transcript CG13871-RA(CG13871)	64.1892	173.114	-1.4313	1.0901e-05	0.00010283	-//-
FBgn0031426	CG18641 gene product from transcript CG18641-RC(CG18641)	121.418	327.499	-1.4315	1.5267e-12	4.4356e-11	sp|Q6NYZ4|PLA1A_DANRE Phospholipase A1 member A OS=Danio rerio OX=7955 GN=pla1a PE=2 SV=1//1.65041e-27
FBgn0033238	ahuizotl(azot)	193.314	521.602	-1.432	1.525e-14	5.9942e-13	sp|P0DP35|CAM2B_XENLA Calmodulin-2 B OS=Xenopus laevis OX=8355 GN=calm2-b PE=1 SV=1//9.11712e-53
FBgn0032649	CG15145 gene product from transcript CG15145-RA(CG15145)	76.2843	205.838	-1.4321	0.00032024	0.0020953	sp|Q7Z4T9|CFA91_HUMAN Cilia- and flagella-associated protein 91 OS=Homo sapiens OX=9606 GN=MAATS1 PE=1 SV=3//7.50939e-13
FBgn0032626	CG12620 gene product from transcript CG12620-RB(CG12620)	355.315	959.829	-1.4337	1.0884e-13	3.6289e-12	-//-
FBgn0041195	Polycystic kidney disease 2 ortholog (H. sapiens)(Pkd2)	84.4807	228.413	-1.4349	9.1935e-05	0.00069415	sp|Q6IVV8|PKD2_DANRE Polycystin-2 OS=Danio rerio OX=7955 GN=pkd2 PE=1 SV=1//9.10944e-81
FBgn0050393	CG30393 gene product from transcript CG30393-RA(CG30393)	314.688	852.184	-1.4372	2.2393e-16	1.1736e-14	-//-
FBgn0051636	CG31636 gene product from transcript CG31636-RB(CG31636)	51.5049	139.513	-1.4376	1.1596e-08	1.9034e-07	sp|Q9VD09|PINTA_DROME Retinol-binding protein pinta OS=Drosophila melanogaster OX=7227 GN=pinta PE=2 SV=1//4.40874e-29
FBgn0030725	CG8958 gene product from transcript CG8958-RA(CG8958)	151.583	411.1	-1.4394	1.2279e-13	4.0686e-12	sp|Q9D5U8|CNBD2_MOUSE Cyclic nucleotide-binding domain-containing protein 2 OS=Mus musculus OX=10090 GN=Cnbd2 PE=1 SV=2//5.42796e-08
FBgn0039398	CG14540 gene product from transcript CG14540-RA(CG14540)	1492.48	4048.33	-1.4396	2.2539e-19	2.0193e-17	-//-
FBgn0262002	CG42820 gene product from transcript CG42820-RA(CG42820)	937.759	2547.24	-1.4416	6.5523e-19	5.3888e-17	-//-
FBgn0031859	CG17377 gene product from transcript CG17377-RF(CG17377)	6350.67	17257.9	-1.4423	2.1397e-19	1.9278e-17	-//-
FBgn0032049	beta-site APP-cleaving enzyme(Bace)	581.503	1582.03	-1.4439	0.00069476	0.0041147	sp|Q03168|ASPP_AEDAE Lysosomal aspartic protease OS=Aedes aegypti OX=7159 GN=AAEL006169 PE=1 SV=2//9.81283e-113
FBgn0051108	CG31108 gene product from transcript CG31108-RA(CG31108)	506.326	1379.62	-1.4461	2.438e-15	1.0771e-13	sp|Q6EMB2|TTLL5_HUMAN Tubulin polyglutamylase TTLL5 OS=Homo sapiens OX=9606 GN=TTLL5 PE=1 SV=3//3.65327e-135
FBgn0005778	Protein phosphatase D5(PpD5)	160.612	437.658	-1.4462	4.6434e-14	1.6659e-12	sp|P23880|PP12_SCHPO Serine/threonine-protein phosphatase PP1-2 OS=Schizosaccharomyces pombe (strain 972 / ATCC 24843) OX=284812 GN=sds21 PE=3 SV=1//3.83983e-139
FBgn0032314	CG7309 gene product from transcript CG7309-RC(CG7309)	807.151	2199.56	-1.4463	9.4825e-19	7.4545e-17	sp|Q9VVT2|INDY1_DROME Protein I&apos;m not dead yet OS=Drosophila melanogaster OX=7227 GN=Indy PE=2 SV=2//5.52498e-34
FBgn0052305	CG32305 gene product from transcript CG32305-RB(CG32305)	66.9931	182.626	-1.4468	3.9675e-05	0.00032513	sp|P40145|ADCY8_HUMAN Adenylate cyclase type 8 OS=Homo sapiens OX=9606 GN=ADCY8 PE=1 SV=1//8.42201e-14
FBgn0034506	CG13870 gene product from transcript CG13870-RB(CG13870)	330.778	901.858	-1.447	1.2813e-14	5.0862e-13	-//-
FBgn0034532	CG13436 gene product from transcript CG13436-RA(CG13436)	484.108	1321.03	-1.4483	8.3315e-18	5.5441e-16	sp|Q6PE87|CF206_MOUSE Cilia- and flagella-associated protein 206 OS=Mus musculus OX=10090 GN=Cfap206 PE=2 SV=2//1.01429e-17
FBgn0261004	asterless(asl)	105.044	286.885	-1.4495	3.362e-07	4.2221e-06	-//-
FBgn0033916	Ubiquitin specific protease 20/33(Usp20-33)	580.812	1586.29	-1.4495	1.6153e-11	4.035e-10	sp|A7Z056|UBP20_BOVIN Ubiquitin carboxyl-terminal hydrolase 20 OS=Bos taurus OX=9913 GN=USP20 PE=2 SV=1//3.46883e-31
FBgn0052445	CG32445 gene product from transcript CG32445-RA(CG32445)	1760.86	4810.62	-1.4499	1.0107e-19	9.5344e-18	sp|Q5EA79|GALM_BOVIN Aldose 1-epimerase OS=Bos taurus OX=9913 GN=GALM PE=2 SV=1//4.41144e-76
FBgn0036940	obstructor-J(obst-J)	29.5098	80.6964	-1.4513	1.8972e-06	2.0968e-05	sp|O17450|PE48_CHRBE Peritrophin-48 OS=Chrysomya bezziana OX=69364 PE=2 SV=1//2.00306e-13
FBgn0031347	CG10869 gene product from transcript CG10869-RA(CG10869)	3068.05	8391.33	-1.4516	3.8973e-20	4.0585e-18	-//-
FBgn0025388	CG12179 gene product from transcript CG12179-RD(CG12179)	231.844	634.831	-1.4532	9.6943e-06	9.2651e-05	-//-
FBgn0051213	CG31213 gene product from transcript CG31213-RB(CG31213)	164.332	450.227	-1.454	1.1101e-08	1.8316e-07	sp|Q99758|ABCA3_HUMAN ATP-binding cassette sub-family A member 3 OS=Homo sapiens OX=9606 GN=ABCA3 PE=1 SV=2//6.19819e-21
FBgn0039147	CG10694 gene product from transcript CG10694-RA(CG10694)	74.1976	203.328	-1.4544	4.0809e-08	6.0429e-07	sp|A3KMV2|RD23A_BOVIN UV excision repair protein RAD23 homolog A OS=Bos taurus OX=9913 GN=RAD23A PE=2 SV=1//5.61082e-32
FBgn0036512	CG16979 gene product from transcript CG16979-RA(CG16979)	840.588	2303.72	-1.4545	2.5575e-16	1.3274e-14	sp|Q9VUR0|UFSP2_DROME Probable Ufm1-specific protease 2 OS=Drosophila melanogaster OX=7227 GN=UFSP2 PE=2 SV=1//0
FBgn0027582	CG6230 gene product from transcript CG6230-RA(CG6230)	1183.81	3245.58	-1.455	4.0502e-14	1.4729e-12	sp|Q9EPE9|AT131_MOUSE Manganese-transporting ATPase 13A1 OS=Mus musculus OX=10090 GN=Atp13a1 PE=1 SV=2//0
FBgn0031169	CG1494 gene product from transcript CG1494-RC(CG1494)	57.522	157.845	-1.4563	0.00022213	0.0015172	sp|E9PU17|ABCAH_RAT ATP-binding cassette sub-family A member 17 OS=Rattus norvegicus OX=10116 GN=Abca17 PE=2 SV=1//4.14749e-100
FBgn0267432	male fertility factor kl3(kl-3)	43.3057	118.847	-1.4565	1.1414e-07	1.5535e-06	sp|Q96JB1|DYH8_HUMAN Dynein heavy chain 8, axonemal OS=Homo sapiens OX=9606 GN=DNAH8 PE=1 SV=2//0
FBgn0038575	CG7208 gene product from transcript CG7208-RA(CG7208)	604.306	1658.77	-1.4568	1.9694e-18	1.4488e-16	-//-
FBgn0035077	CG9083 gene product from transcript CG9083-RB(CG9083)	20.1265	55.3035	-1.4583	0.00069481	0.0041147	-//-
FBgn0034783	CG9825 gene product from transcript CG9825-RA(CG9825)	74.2994	204.218	-1.4587	1.3192e-10	2.8744e-09	sp|Q9V7S5|PICO_DROME Putative inorganic phosphate cotransporter OS=Drosophila melanogaster OX=7227 GN=Picot PE=2 SV=1//5.70801e-78
FBgn0040510	CG17176 gene product from transcript CG17176-RG(ACXA)	413.632	1137.2	-1.4591	1.0484e-17	6.919e-16	sp|P51828|ADCY7_HUMAN Adenylate cyclase type 7 OS=Homo sapiens OX=9606 GN=ADCY7 PE=1 SV=1//2.2076e-07
FBgn0032609	CG13280 gene product from transcript CG13280-RA(CG13280)	832.817	2292.57	-1.4609	4.8095e-16	2.3515e-14	sp|Q642M9|DHDH_DANRE Trans-1,2-dihydrobenzene-1,2-diol dehydrogenase OS=Danio rerio OX=7955 GN=dhdh PE=2 SV=2//1.00348e-65
FBgn0034842	Proteasome beta5 subunit-related 1(Prosbeta5R1)	701.068	1930.37	-1.4612	7.5767e-19	6.1368e-17	sp|Q32KL2|PSB5_BOVIN Proteasome subunit beta type-5 OS=Bos taurus OX=9913 GN=PSMB5 PE=1 SV=1//6.11051e-77
FBgn0011725	CG31137 gene product from transcript CG31137-RE(twin)	2132.94	5875.83	-1.462	3.6913e-19	3.1322e-17	sp|Q9ULM6|CNOT6_HUMAN CCR4-NOT transcription complex subunit 6 OS=Homo sapiens OX=9606 GN=CNOT6 PE=1 SV=2//0
FBgn0086916	sneaky(snky)	33.2123	91.5232	-1.4624	5.2851e-07	6.3968e-06	sp|Q059Y8|DCST1_MOUSE E3 ubiquitin-protein ligase DCST1 OS=Mus musculus OX=10090 GN=Dcst1 PE=2 SV=1//1.23368e-43
FBgn0036874	brivido-1(brv1)	25.2248	69.5929	-1.4641	5.3292e-06	5.3282e-05	sp|Q6IVV8|PKD2_DANRE Polycystin-2 OS=Danio rerio OX=7955 GN=pkd2 PE=1 SV=1//6.42933e-11
FBgn0030536	CG11068 gene product from transcript CG11068-RA(CG11068)	333.458	921.596	-1.4666	1.2143e-11	3.091e-10	-//-
FBgn0034546	CG13442 gene product from transcript CG13442-RA(CG13442)	1143.63	3161.09	-1.4668	1.0639e-19	9.9198e-18	sp|Q32L65|MARH2_BOVIN E3 ubiquitin-protein ligase MARCH2 OS=Bos taurus OX=9913 GN=MARCH2 PE=2 SV=1//1.97688e-11
FBgn0261571	CG42685 gene product from transcript CG42685-RA(CG42685)	23.8936	66.0757	-1.4675	0.00013901	0.001006	sp|Q9Z0T6|PKDRE_MOUSE Polycystic kidney disease and receptor for egg jelly-related protein OS=Mus musculus OX=10090 GN=Pkdrej PE=2 SV=1//6.2969e-10
FBgn0038445	CG14891 gene product from transcript CG14891-RA(CG14891)	273.72	758.134	-1.4698	1.14e-16	6.3044e-15	sp|P23799|ESAG8_TRYBB Putative adenylate cyclase regulatory protein OS=Trypanosoma brucei brucei OX=5702 GN=ESAG8 PE=2 SV=1//1.42222e-06
FBgn0051391	CG31391 gene product from transcript CG31391-RA(CG31391)	407.339	1128.96	-1.4707	7.0563e-18	4.795e-16	sp|Q68FW6|PPR36_RAT Protein phosphatase 1 regulatory subunit 36 OS=Rattus norvegicus OX=10116 GN=Ppp1r36 PE=2 SV=1//1.98776e-06
FBgn0032851	CG13970 gene product from transcript CG13970-RA(CG13970)	12.6406	35.0838	-1.4727	0.00062786	0.0037683	-//-
FBgn0015230	Glucose transporter type 3(Glut3)	377.949	1050.8	-1.4752	1.8651e-12	5.3508e-11	sp|P53403|GTR3_DROME Glucose transporter type 3 OS=Drosophila melanogaster OX=7227 GN=Glut3 PE=2 SV=1//0
FBgn0051882	CG31882 gene product from transcript CG31882-RA(CG31882)	505.598	1406.19	-1.4757	1.761e-18	1.3075e-16	-//-
FBgn0036153	CG7573 gene product from transcript CG7573-RB(CG7573)	47.2419	131.472	-1.4766	9.5494e-09	1.5919e-07	sp|O75844|FACE1_HUMAN CAAX prenyl protease 1 homolog OS=Homo sapiens OX=9606 GN=ZMPSTE24 PE=1 SV=2//5.55964e-15
FBgn0033190	CG2137 gene product from transcript CG2137-RA(CG2137)	1073.68	2988.56	-1.4769	5.796e-16	2.7746e-14	sp|P43304|GPDM_HUMAN Glycerol-3-phosphate dehydrogenase, mitochondrial OS=Homo sapiens OX=9606 GN=GPD2 PE=1 SV=3//0
FBgn0000047	Actin 88F(Act88F)	116.501	325.144	-1.4807	1.3495e-11	3.4029e-10	sp|P83968|ACT6_DROSI Actin, indirect flight muscle OS=Drosophila simulans OX=7240 GN=Act88F PE=3 SV=1//0
FBgn0033371	Concentrative Nucleoside Transporter 1(CNT1)	1000.31	2793.13	-1.4814	1.1798e-19	1.0937e-17	sp|Q62773|S28A2_RAT Sodium/nucleoside cotransporter 2 OS=Rattus norvegicus OX=10116 GN=Slc28a2 PE=1 SV=1//1.46074e-87
FBgn0029539	CG11663 gene product from transcript CG11663-RA(CG11663)	200.542	560.185	-1.482	9.7346e-16	4.499e-14	-//-
FBgn0028848	CG7311 gene product from transcript CG7311-RD(CG7311)	1493.64	4174.53	-1.4828	1.0531e-16	5.9049e-15	sp|P90795|GPDM_CAEEL Probable glycerol-3-phosphate dehydrogenase, mitochondrial OS=Caenorhabditis elegans OX=6239 GN=T25G3.4 PE=3 SV=2//3.35754e-118
FBgn0260461	Reduction in Cnn dots 7(Rcd7)	1282.32	3589.95	-1.4852	2.3109e-20	2.5383e-18	sp|Q9VW09|LTN1_DROME E3 ubiquitin-protein ligase listerin OS=Drosophila melanogaster OX=7227 GN=l(3)76BDr PE=1 SV=2//5.31742e-16
FBgn0034205	CG10950 gene product from transcript CG10950-RA(CG10950)	203.487	569.838	-1.4856	8.345e-16	3.9129e-14	sp|Q6P2B1|TNPO3_MOUSE Transportin-3 OS=Mus musculus OX=10090 GN=Tnpo3 PE=1 SV=1//2.65938e-26
FBgn0053490	CG33490 gene product from transcript CG33490-RA(CG33490)	229.265	642.503	-1.4867	2.3518e-16	1.2285e-14	sp|Q8CDU5|EFHB_MOUSE EF-hand domain-containing family member B OS=Mus musculus OX=10090 GN=Efhb PE=1 SV=2//7.13447e-10
FBgn0062517	CG16984 gene product from transcript CG16984-RA(CG16984)	508.653	1426.75	-1.488	5.8547e-18	4.047e-16	sp|Q8TC29|ENKUR_HUMAN Enkurin OS=Homo sapiens OX=9606 GN=ENKUR PE=2 SV=1//1.24141e-21
FBgn0031575	CG3980 gene product from transcript CG3980-RB(Cep97)	477.678	1340.47	-1.4886	1.1656e-18	9.0301e-17	sp|Q9CZ62|CEP97_MOUSE Centrosomal protein of 97 kDa OS=Mus musculus OX=10090 GN=Cep97 PE=1 SV=1//4.05933e-73
FBgn0034687	CG11475 gene product from transcript CG11475-RA(CG11475)	127.977	359.199	-1.4889	8.682e-14	2.9814e-12	sp|Q58EM4|ARMT1_DANRE Protein-glutamate O-methyltransferase OS=Danio rerio OX=7955 GN=armt1 PE=2 SV=1//3.10021e-74
FBgn0264980	ncRNA(CR44131)	143.952	404.371	-1.4901	2.3901e-14	9.04e-13	-//-
FBgn0053306	CG33306 gene product from transcript CG33306-RA(CG33306)	309.546	869.657	-1.4903	1.8196e-17	1.1584e-15	-//-
FBgn0063298	ncRNA(CR31429)	127.101	357.394	-1.4915	8.2352e-14	2.8341e-12	sp|P29503|NEUR_DROME Protein neuralized OS=Drosophila melanogaster OX=7227 GN=neur PE=1 SV=2//0
FBgn0264708	ncRNA(CR43977)	13.3179	37.4546	-1.4918	0.00037768	0.0024206	-//-
FBgn0266256	ncRNA(CR44951)	11.9729	33.7012	-1.493	0.00076395	0.0044599	-//-
FBgn0261587	CG42697 gene product from transcript CG42697-RA(CG42697)	79.0815	222.681	-1.4936	1.1312e-06	1.2949e-05	-//-
FBgn0032369	CG6614 gene product from transcript CG6614-RC(CG6614)	120.028	338.238	-1.4947	6.5527e-09	1.1239e-07	-//-
FBgn0052181	CG32181 gene product from transcript CG32181-RB(CG32181)	484.241	1365.29	-1.4954	1.3009e-16	7.1202e-15	-//-
FBgn0052380	CG32380 gene product from transcript CG32380-RA(SMSr)	595.671	1680.08	-1.4959	2.4353e-19	2.1459e-17	sp|Q9VS60|SMSR1_DROME Sphingomyelin synthase-related 1 OS=Drosophila melanogaster OX=7227 GN=SMSr PE=1 SV=2//0
FBgn0267322	ncRNA(CR45758)	9.28982	26.2074	-1.4963	0.0025915	0.012847	-//-
FBgn0002873	mushroom body defect(mud)	275.253	776.849	-1.4969	0.00090334	0.0051426	-//-
FBgn0037405	CG1077 gene product from transcript CG1077-RA(CG1077)	16.9104	47.7317	-1.497	6.9622e-05	0.00054226	-//-
FBgn0266655	ncRNA(CR45162)	54.8994	154.999	-1.4974	1.1118e-09	2.1328e-08	sp|O14732|IMPA2_HUMAN Inositol monophosphatase 2 OS=Homo sapiens OX=9606 GN=IMPA2 PE=1 SV=1//3.25959e-32
FBgn0031129	CG1324 gene product from transcript CG1324-RC(CG1324)	1507.27	4261.16	-1.4993	4.4132e-18	3.0906e-16	-//-
FBgn0035598	CG4669 gene product from transcript CG4669-RA(CG4669)	3060.16	8661.7	-1.501	2.3624e-21	3.2382e-19	-//-
FBgn0052232	CG32232 gene product from transcript CG32232-RA(CG32232)	81.6136	231.255	-1.5026	2.2738e-09	4.201e-08	-//-
FBgn0050268	CG30268 gene product from transcript CG30268-RB(CG30268)	128.337	363.782	-1.5031	1.7831e-09	3.3289e-08	sp|Q8CEL2|CFA61_MOUSE Cilia- and flagella-associated protein 61 OS=Mus musculus OX=10090 GN=Cfap61 PE=1 SV=2//2.01127e-06
FBgn0040506	CG17178 gene product from transcript CG17178-RB(ACXE)	11.9468	33.9068	-1.505	0.0005846	0.0035392	sp|P97490|ADCY8_MOUSE Adenylate cyclase type 8 OS=Mus musculus OX=10090 GN=Adcy8 PE=1 SV=2//8.0258e-92
FBgn0050362	borrelly(boly)	797.58	2263.88	-1.5051	4.0618e-20	4.1756e-18	-//-
FBgn0053302	Cuticular protein 31A(Cpr31A)	13.2918	37.7326	-1.5053	0.00032769	0.0021398	sp|Q17015|CU01_ANOGA Cuticle protein OS=Anopheles gambiae OX=7165 GN=Ccp84Ab PE=2 SV=3//7.39947e-20
FBgn0030780	CG13008 gene product from transcript CG13008-RA(CG13008)	888.938	2524.07	-1.5056	2.6716e-20	2.8755e-18	-//-
FBgn0029662	CG12206 gene product from transcript CG12206-RA(CG12206)	122.012	346.498	-1.5058	7.2006e-14	2.4941e-12	sp|Q9W4S1|GRCR2_DROME Glutaredoxin domain-containing cysteine-rich protein CG12206 OS=Drosophila melanogaster OX=7227 GN=CG12206 PE=2 SV=2//0
FBgn0034411	CG18605 gene product from transcript CG18605-RB(CG18605)	30.4907	86.597	-1.5059	4.1058e-07	5.0727e-06	sp|Q9V8P9|TOPRS_DROME E3 ubiquitin-protein ligase Topors OS=Drosophila melanogaster OX=7227 GN=Topors PE=1 SV=1//5.49512e-22
FBgn0050222	CG30222 gene product from transcript CG30222-RF(CG30222)	169.184	481.023	-1.5075	1.434e-11	3.5973e-10	-//-
FBgn0032969	CG2528 gene product from transcript CG2528-RG(CG2528)	588.976	1674.65	-1.5076	1.3395e-19	1.2276e-17	sp|P48147|PPCE_HUMAN Prolyl endopeptidase OS=Homo sapiens OX=9606 GN=PREP PE=1 SV=2//0
FBgn0052574	Tweedlealpha(Twdlalpha)	54.5026	154.966	-1.5076	7.5392e-10	1.489e-08	-//-
FBgn0031496	CG17258 gene product from transcript CG17258-RC(CG17258)	95.6485	272.046	-1.508	2.1644e-07	2.8038e-06	sp|Q8NCU4|CC191_HUMAN Coiled-coil domain-containing protein 191 OS=Homo sapiens OX=9606 GN=CCDC191 PE=2 SV=1//1.16602e-11
FBgn0085331	CG34302 gene product from transcript CG34302-RB(CG34302)	15.5971	44.3737	-1.5084	0.00011443	0.0008453	-//-
FBgn0267705	ncRNA(CR46038)	15.2069	43.2706	-1.5087	0.00013671	0.00099476	sp|Q9GPJ1|SKEL2_DROME Protein Skeletor, isoforms D/E OS=Drosophila melanogaster OX=7227 GN=Skeletor PE=1 SV=3//5.76651e-30
FBgn0029809	CG15767 gene product from transcript CG15767-RA(CG15767)	114.745	326.751	-1.5098	1.2105e-13	4.0193e-12	sp|O00060|CYPH_UROFA Peptidyl-prolyl cis-trans isomerase OS=Uromyces fabae OX=55588 GN=PIG28 PE=2 SV=1//1.67922e-09
FBgn0052523	CG32523 gene product from transcript CG32523-RA(CG32523)	75.4193	214.826	-1.5102	4.5952e-10	9.352e-09	sp|Q17004|SP24D_ANOGA Serine protease SP24D OS=Anopheles gambiae OX=7165 GN=Sp24D PE=2 SV=3//1.31706e-33
FBgn0033784	CG13322 gene product from transcript CG13322-RA(CG13322)	396.992	1131.84	-1.5115	1.0528e-18	8.2357e-17	sp|Q8IWE4|DCNL3_HUMAN DCN1-like protein 3 OS=Homo sapiens OX=9606 GN=DCUN1D3 PE=1 SV=1//4.87548e-51
FBgn0039331	NADH dehydrogenase (ubiquinone) 49 kDa subunit-like(ND-49L)	317.773	906.501	-1.5123	4.354e-18	3.0625e-16	sp|P17694|NDUS2_BOVIN NADH dehydrogenase [ubiquinone] iron-sulfur protein 2, mitochondrial OS=Bos taurus OX=9913 GN=NDUFS2 PE=1 SV=2//0
FBgn0034007	NADH dehydrogenase (ubiquinone) 51 kDa subunit-like 2(ND-51L2)	249.478	712.024	-1.513	3.7335e-17	2.294e-15	sp|Q8HXQ9|NDUV1_MACFA NADH dehydrogenase [ubiquinone] flavoprotein 1, mitochondrial OS=Macaca fascicularis OX=9541 GN=NDUFV1 PE=2 SV=1//1.92211e-162
FBgn0027512	CG10254 gene product from transcript CG10254-RB(CG10254)	1323.7	3778.86	-1.5134	6.0639e-09	1.0457e-07	sp|Q6ZPJ3|UBE2O_MOUSE (E3-independent) E2 ubiquitin-conjugating enzyme UBE2O OS=Mus musculus OX=10090 GN=Ube2o PE=1 SV=3//6.39688e-17
FBgn0033953	CG12861 gene product from transcript CG12861-RA(CG12861)	2858.54	8164.54	-1.5141	1.1055e-21	1.7047e-19	-//-
FBgn0036348	CG17687 gene product from transcript CG17687-RA(CG17687)	65.5438	187.479	-1.5162	4.0238e-07	4.9753e-06	sp|Q8NDM7|CFA43_HUMAN Cilia- and flagella-associated protein 43 OS=Homo sapiens OX=9606 GN=CFAP43 PE=2 SV=3//3.10836e-16
FBgn0029989	CG15333 gene product from transcript CG15333-RA(CG15333)	108.686	311.001	-1.5168	9.0807e-13	2.7018e-11	sp|Q9W3L5|DM7A_DROME DM7 family protein CG15333 OS=Drosophila melanogaster OX=7227 GN=CG15333 PE=2 SV=3//0
FBgn0050323	CG30323 gene product from transcript CG30323-RB(CG30323)	45.5026	130.265	-1.5174	5.6595e-09	9.8121e-08	-//-
FBgn0034324	CG18538 gene product from transcript CG18538-RA(CG18538)	9.62779	27.5764	-1.5182	0.0018163	0.0094569	-//-
FBgn0033468	CG1418 gene product from transcript CG1418-RA(CG1418)	849.684	2436.07	-1.5196	1.3346e-20	1.5509e-18	sp|Q9UI14|PRAF1_HUMAN Prenylated Rab acceptor protein 1 OS=Homo sapiens OX=9606 GN=RABAC1 PE=1 SV=1//1.12709e-27
FBgn0039498	CG17991 gene product from transcript CG17991-RA(CG17991)	354.517	1017.13	-1.5206	1.2537e-18	9.6202e-17	sp|Q6GM44|MARH5_XENLA E3 ubiquitin-protein ligase MARCH5 OS=Xenopus laevis OX=8355 GN=march5 PE=2 SV=1//1.62614e-66
FBgn0033279	CG2291 gene product from transcript CG2291-RB(CG2291)	336.253	964.844	-1.5208	1.8313e-18	1.3534e-16	-//-
FBgn0039246	CG10845 gene product from transcript CG10845-RA(CG10845)	880.146	2526.96	-1.5216	7.9023e-17	4.5423e-15	sp|P17210|KINH_DROME Kinesin heavy chain OS=Drosophila melanogaster OX=7227 GN=Khc PE=1 SV=2//5.69302e-17
FBgn0039071	CG4434 gene product from transcript CG4434-RA(CG4434)	937.528	2694.26	-1.523	7.5411e-21	9.1618e-19	sp|P54385|DHE3_DROME Glutamate dehydrogenase, mitochondrial OS=Drosophila melanogaster OX=7227 GN=Gdh PE=1 SV=2//2.52971e-166
FBgn0261514	Nimrod A(NimA)	20.3602	58.5873	-1.5248	1.0961e-05	0.00010334	sp|Q9W0A0|DRPR_DROME Protein draper OS=Drosophila melanogaster OX=7227 GN=drpr PE=1 SV=3//2.72316e-06
FBgn0028531	CG15286 gene product from transcript CG15286-RA(CG15286)	1001.07	2881.38	-1.5252	5.6775e-21	7.1133e-19	sp|Q95RX5|KCMF1_DROME E3 ubiquitin-protein ligase Kcmf1 OS=Drosophila melanogaster OX=7227 GN=Kcmf1 PE=1 SV=1//1.91806e-30
FBgn0264711	CG43980 gene product from transcript CG43980-RB(CG43980)	20.547	59.1889	-1.5264	1.2255e-05	0.00011413	sp|Q8N961|ABTB2_HUMAN Ankyrin repeat and BTB/POZ domain-containing protein 2 OS=Homo sapiens OX=9606 GN=ABTB2 PE=2 SV=2//1.23419e-176
FBgn0050484	CG30484 gene product from transcript CG30484-RB(CG30484)	22.3014	64.2569	-1.5267	5.2221e-06	5.244e-05	-//-
FBgn0053125	CG33125 gene product from transcript CG33125-RC(CG33125)	314.285	905.857	-1.5272	5.9072e-15	2.4291e-13	-//-
FBgn0036784	CG5103 gene product from transcript CG5103-RA(CG5103)	1020.4	2942.48	-1.5279	1.4559e-20	1.6559e-18	sp|Q9D4D4|TKTL2_MOUSE Transketolase-like protein 2 OS=Mus musculus OX=10090 GN=Tktl2 PE=1 SV=1//0
FBgn0036031	CG6761 gene product from transcript CG6761-RA(CG6761)	1118.37	3225.31	-1.528	3.5122e-21	4.5644e-19	sp|Q08AX9|K1841_XENLA Uncharacterized protein KIAA1841 homolog OS=Xenopus laevis OX=8355 PE=2 SV=1//1.25835e-74
FBgn0052238	CG32238 gene product from transcript CG32238-RA(CG32238)	497.873	1436.35	-1.5286	8.7895e-20	8.4406e-18	sp|Q0VC71|TTLL1_BOVIN Probable tubulin polyglutamylase TTLL1 OS=Bos taurus OX=9913 GN=TTLL1 PE=2 SV=1//0
FBgn0038068	CG11600 gene product from transcript CG11600-RB(CG11600)	9.99049	28.8341	-1.5291	0.0012845	0.0070137	sp|O46108|LIP3_DROME Lipase 3 OS=Drosophila melanogaster OX=7227 GN=Lip3 PE=2 SV=1//1.90828e-75
FBgn0001217	Heat shock protein cognate 2(Hsc70-2)	2361.34	6815.99	-1.5293	7.5999e-22	1.2829e-19	sp|P11146|HSP7B_DROME Heat shock 70 kDa protein cognate 2 OS=Drosophila melanogaster OX=7227 GN=Hsc70-2 PE=1 SV=2//0
FBgn0260959	Microcephalin(MCPH1)	1164.04	3363.72	-1.5309	6.7079e-12	1.784e-10	sp|P61593|MCPH1_PANTR Microcephalin OS=Pan troglodytes OX=9598 GN=MCPH1 PE=3 SV=1//7.56859e-14
FBgn0038151	CG17044 gene product from transcript CG17044-RB(yellow-e2)	18.9369	54.7427	-1.5315	2.0008e-05	0.00017562	sp|O02437|YELL_DROSU Protein yellow OS=Drosophila subobscura OX=7241 GN=y PE=3 SV=1//2.16844e-35
FBgn0040509	CG17174 gene product from transcript CG17174-RA(ACXB)	40.3465	116.74	-1.5328	1.3923e-08	2.2463e-07	sp|P26769|ADCY2_RAT Adenylate cyclase type 2 OS=Rattus norvegicus OX=10116 GN=Adcy2 PE=1 SV=1//6.57803e-89
FBgn0042179	CG18869 gene product from transcript CG18869-RA(CG18869)	237.899	688.392	-1.5329	1.8202e-17	1.1584e-15	sp|Q1LZI1|UD3A1_BOVIN UDP-glucuronosyltransferase 3A1 OS=Bos taurus OX=9913 GN=UGT3A1 PE=2 SV=1//9.96552e-15
FBgn0051361	defective proboscis extension response 17(dpr17)	1529.4	4427.65	-1.5336	1.047e-21	1.6302e-19	sp|G5ED00|ZIG8_CAEEL Zwei Ig domain protein zig-8 OS=Caenorhabditis elegans OX=6239 GN=zig-8 PE=2 SV=1//4.185e-09
FBgn0267628	ncRNA(CR45966)	6.68095	19.3427	-1.5337	0.0069244	0.029487	-//-
FBgn0028534	CG7916 gene product from transcript CG7916-RA(CG7916)	1531.55	4434.5	-1.5338	7.7769e-22	1.2992e-19	-//-
FBgn0039379	CG5886 gene product from transcript CG5886-RA(CG5886)	645.673	1873.53	-1.5369	3.4152e-15	1.4683e-13	sp|Q6PAM1|TXLNA_MOUSE Alpha-taxilin OS=Mus musculus OX=10090 GN=Txlna PE=1 SV=1//3.3458e-39
FBgn0260481	CG32454 gene product from transcript CG32454-RA(CG32454)	243.206	708.805	-1.5432	8.731e-17	4.9829e-15	sp|Q9NQH7|XPP3_HUMAN Xaa-Pro aminopeptidase 3 OS=Homo sapiens OX=9606 GN=XPNPEP3 PE=1 SV=1//4.01125e-18
FBgn0051679	Testis EndoG-Like 3(Tengl3)	323.741	943.52	-1.5432	8.909e-19	7.0381e-17	sp|O08600|NUCG_MOUSE Endonuclease G, mitochondrial OS=Mus musculus OX=10090 GN=Endog PE=1 SV=1//1.41406e-19
FBgn0265306	ncRNA(CR44279)	79.0859	230.605	-1.5439	2.9194e-12	8.1849e-11	-//-
FBgn0032883	CG9323 gene product from transcript CG9323-RB(CG9323)	829.638	2419.28	-1.544	2.0428e-16	1.0741e-14	sp|Q9H2U1|DHX36_HUMAN ATP-dependent RNA helicase DHX36 OS=Homo sapiens OX=9606 GN=DHX36 PE=1 SV=2//0
FBgn0035078	Thiamine pyrophosphate carrier protein 2(Tpc2)	295.271	861.06	-1.5441	3.9003e-16	1.9608e-14	sp|Q29RM1|TPC_BOVIN Mitochondrial thiamine pyrophosphate carrier OS=Bos taurus OX=9913 GN=SLC25A19 PE=2 SV=1//1.04021e-08
FBgn0039704	neyo(neo)	29.1952	85.1575	-1.5444	1.7115e-05	0.00015291	-//-
FBgn0053092	delta-1-Pyrroline-5-carboxylate dehydrogenase 2(P5CDh2)	1272.71	3712.8	-1.5446	9.2813e-22	1.4737e-19	sp|A7YWE4|AL4A1_BOVIN Delta-1-pyrroline-5-carboxylate dehydrogenase, mitochondrial OS=Bos taurus OX=9913 GN=ALDH4A1 PE=2 SV=1//3.30351e-169
FBgn0011743	Actin-related protein 53D(Arp53D)	448.431	1310.95	-1.5477	6.8692e-20	6.7172e-18	sp|P45891|ACTY_DROME Actin-like protein 53D OS=Drosophila melanogaster OX=7227 GN=Arp53D PE=2 SV=2//0
FBgn0016080	CG32561 gene product from transcript CG32561-RA(xmas-1)	657.446	1922.23	-1.5478	7.9504e-18	5.3572e-16	sp|Q9U3V8|XMAS1_DROME Protein xmas-1 OS=Drosophila melanogaster OX=7227 GN=xmas-1 PE=4 SV=2//0
FBgn0051913	CG31913 gene product from transcript CG31913-RA(CG31913)	580.11	1696.55	-1.5482	1.3757e-20	1.5872e-18	-//-
FBgn0053287	CG33287 gene product from transcript CG33287-RB(CG33287)	403.282	1180.18	-1.5491	4.094e-14	1.4854e-12	-//-
FBgn0037375	katanin p60-like 1(kat-60L1)	806.385	2360.83	-1.5498	2.8801e-21	3.8814e-19	sp|Q0IIR9|KTNA1_XENTR Katanin p60 ATPase-containing subunit A1 OS=Xenopus tropicalis OX=8364 GN=katna1 PE=2 SV=1//3.53369e-144
FBgn0266437	CG45067 gene product from transcript CG45067-RA(CG45067)	9.54119	27.9613	-1.5512	0.0027982	0.013727	sp|P82295|PROML_DROME Prominin-like protein OS=Drosophila melanogaster OX=7227 GN=prominin-like PE=1 SV=1//2.26824e-32
FBgn0033848	CG13330 gene product from transcript CG13330-RA(CG13330)	356.361	1044.55	-1.5515	2.6013e-19	2.2673e-17	-//-
FBgn0039792	CG2267 gene product from transcript CG2267-RB(CG2267)	1965.97	5765.35	-1.5522	6.513e-22	1.1353e-19	-//-
FBgn0050438	CG30438 gene product from transcript CG30438-RB(CG30438)	1556.28	4565.15	-1.5526	1.4601e-22	3.2047e-20	sp|Q16880|CGT_HUMAN 2-hydroxyacylsphingosine 1-beta-galactosyltransferase OS=Homo sapiens OX=9606 GN=UGT8 PE=2 SV=2//3.11491e-65
FBgn0032520	CG10859 gene product from transcript CG10859-RA(CG10859)	1281.64	3763.35	-1.554	4.9959e-22	8.9775e-20	sp|Q16960|DYI3_HELCR Dynein intermediate chain 3, ciliary OS=Heliocidaris crassispina OX=1043166 PE=2 SV=1//5.3676e-92
FBgn0037759	CG8526 gene product from transcript CG8526-RA(CG8526)	2068.83	6077.44	-1.5546	1.2082e-17	7.8443e-16	sp|Q9U518|ASPG_DIRIM L-asparaginase OS=Dirofilaria immitis OX=6287 PE=1 SV=1//3.56481e-153
FBgn0052224	ncRNA(CR32224)	7.67698	22.5676	-1.5556	0.0036571	0.01728	sp|O17450|PE48_CHRBE Peritrophin-48 OS=Chrysomya bezziana OX=69364 PE=2 SV=1//5.99365e-14
FBgn0261268	Cullin 3(Cul3)	1710.39	5031.36	-1.5566	2.927e-18	2.124e-16	sp|Q6DE95|CUL3A_XENLA Cullin-3-A OS=Xenopus laevis OX=8355 GN=cul3a PE=1 SV=1//0
FBgn0033377	Phosphomannomutase 45A(Pmm45A)	1804.88	5313.44	-1.5577	4.6687e-19	3.92e-17	sp|Q5R979|PGM2L_PONAB Glucose 1,6-bisphosphate synthase OS=Pongo abelii OX=9601 GN=PGM2L1 PE=2 SV=1//0
FBgn0034423	testis-specifically expressed bromodomain containing protein-2(tbrd-2)	52.2451	153.808	-1.5578	0.0003014	0.0019867	sp|Q58F21|BRDT_HUMAN Bromodomain testis-specific protein OS=Homo sapiens OX=9606 GN=BRDT PE=1 SV=4//3.08959e-09
FBgn0034487	EFHC1 homologue 2(Efhc1.2)	113.132	333.291	-1.5588	9.2124e-11	2.0491e-09	sp|Q32TF8|EFHC2_DANRE EF-hand domain-containing family member C2 OS=Danio rerio OX=7955 GN=efhc2 PE=2 SV=2//2.79426e-142
FBgn0038269	CG7292 gene product from transcript CG7292-RC(Rrp6)	550.027	1620.87	-1.5592	5.9666e-13	1.8157e-11	sp|Q01780|EXOSX_HUMAN Exosome component 10 OS=Homo sapiens OX=9606 GN=EXOSC10 PE=1 SV=2//1.06127e-137
FBgn0028903	CG13243 gene product from transcript CG13243-RB(CG13243)	692.794	2042.44	-1.5598	3.3258e-21	4.3718e-19	-//-
FBgn0035273	CG12020 gene product from transcript CG12020-RA(CG12020)	615.574	1814.92	-1.5599	2.794e-16	1.4454e-14	sp|Q80Y75|DJB13_MOUSE DnaJ homolog subfamily B member 13 OS=Mus musculus OX=10090 GN=Dnajb13 PE=1 SV=1//3.90929e-51
FBgn0267806	ncRNA(CR46131)	13.5308	39.9322	-1.5613	0.00022997	0.0015608	-//-
FBgn0032647	CG15143 gene product from transcript CG15143-RA(CG15143)	99.5615	294.002	-1.5622	7.1259e-14	2.4736e-12	sp|Q95LR0|CFA91_MACFA Cilia- and flagella-associated protein 91 OS=Macaca fascicularis OX=9541 GN=MAATS1 PE=2 SV=3//1.74305e-07
FBgn0033149	CG11060 gene product from transcript CG11060-RA(CG11060)	177.346	524.074	-1.5632	7.0179e-13	2.1155e-11	-//-
FBgn0015008	alpha actinin 3(Actn3)	267.726	791.504	-1.5638	1.3526e-18	1.0329e-16	sp|Q5SXY1|CYTSB_MOUSE Cytospin-B OS=Mus musculus OX=10090 GN=Specc1 PE=1 SV=2//4.22737e-13
FBgn0039799	CG15543 gene product from transcript CG15543-RB(CG15543)	196.06	579.931	-1.5646	2.7097e-17	1.6843e-15	sp|Q502L7|KAD8_DANRE Adenylate kinase 8 OS=Danio rerio OX=7955 GN=ak8 PE=2 SV=1//8.67422e-08
FBgn0036882	CG9279 gene product from transcript CG9279-RB(CG9279)	1257.54	3725.12	-1.5667	3.262e-17	2.0198e-15	sp|P13496|DCTN1_DROME Dynactin subunit 1 OS=Drosophila melanogaster OX=7227 GN=DCTN1-p150 PE=1 SV=2//1.68416e-23
FBgn0086681	Male-specific transcript 36Fa(Mst36Fa)	150.528	446.026	-1.5671	3.9152e-16	1.9621e-14	-//-
FBgn0037325	CG12147 gene product from transcript CG12147-RA(CG12147)	319.874	948.391	-1.568	2.3381e-19	2.0831e-17	sp|Q8BK63|KC1A_MOUSE Casein kinase I isoform alpha OS=Mus musculus OX=10090 GN=Csnk1a1 PE=1 SV=2//1.16352e-126
FBgn0053140	CG33140 gene product from transcript CG33140-RA(CG33140)	272.351	807.814	-1.5686	1.0639e-18	8.2827e-17	-//-
FBgn0003187	quail(qua)	673.298	1997.25	-1.5687	1.4097e-16	7.612e-15	sp|Q23989|QUAI_DROME Villin-like protein quail OS=Drosophila melanogaster OX=7227 GN=qua PE=2 SV=2//0
FBgn0036599	CG13044 gene product from transcript CG13044-RA(CG13044)	17.5341	52.0859	-1.5707	1.8996e-05	0.00016785	-//-
FBgn0039727	CG15523 gene product from transcript CG15523-RA(CG15523)	843.808	2507.17	-1.5711	5.6055e-10	1.1237e-08	sp|Q7Z7G8|VP13B_HUMAN Vacuolar protein sorting-associated protein 13B OS=Homo sapiens OX=9606 GN=VPS13B PE=1 SV=2//2.31789e-24
FBgn0260634	eukaryotic translation initiation factor 4G2(eIF4G2)	1557.01	4630.09	-1.5723	8.2586e-11	1.8576e-09	sp|Q80XI3|IF4G3_MOUSE Eukaryotic translation initiation factor 4 gamma 3 OS=Mus musculus OX=10090 GN=Eif4g3 PE=1 SV=2//1.0977e-42
FBgn0042711	CG33102 gene product from transcript CG33102-RA(Hex-t1)	161.066	479.554	-1.574	1.7995e-16	9.5952e-15	sp|Q9NFT9|HXK1_DROME Hexokinase type 1 OS=Drosophila melanogaster OX=7227 GN=Hex-t1 PE=2 SV=1//0
FBgn0051874	CG31874 gene product from transcript CG31874-RA(CG31874)	524.797	1562.68	-1.5742	6.5699e-21	8.0429e-19	sp|O17214|FUMH_CAEEL Probable fumarate hydratase, mitochondrial OS=Caenorhabditis elegans OX=6239 GN=fum-1 PE=3 SV=1//0
FBgn0025686	Amnionless ortholog(Amnionless)	6.32373	18.8492	-1.5757	0.0071143	0.030151	sp|Q9VPN2|AMNLS_DROME Protein amnionless OS=Drosophila melanogaster OX=7227 GN=Amnionless PE=2 SV=1//0
FBgn0031784	CG9222 gene product from transcript CG9222-RA(CG9222)	687.038	2047.95	-1.5757	1.0914e-17	7.1732e-16	sp|Q61241|TSSK1_MOUSE Testis-specific serine/threonine-protein kinase 1 OS=Mus musculus OX=10090 GN=Tssk1b PE=1 SV=2//2.12525e-77
FBgn0036962	CG17122 gene product from transcript CG17122-RA(CG17122)	368.837	1101.45	-1.5783	4.7656e-20	4.8067e-18	sp|Q0VFN8|CF157_XENTR Cilia- and flagella-associated protein 157 OS=Xenopus tropicalis OX=8364 GN=cfap157 PE=2 SV=1//2.25372e-27
FBgn0053322	CG33322 gene product from transcript CG33322-RA(CG33322)	407.145	1217.73	-1.5806	2.1156e-20	2.3399e-18	-//-
FBgn0030033	CG1387 gene product from transcript CG1387-RA(CG1387)	531.201	1589	-1.5808	2.4269e-20	2.6297e-18	-//-
FBgn0032397	Translocase of outer membrane 70(Tom70)	1032.4	3088.47	-1.5809	9.47e-21	1.1419e-18	sp|O94826|TOM70_HUMAN Mitochondrial import receptor subunit TOM70 OS=Homo sapiens OX=9606 GN=TOMM70 PE=1 SV=1//1.3458e-139
FBgn0032648	CG15144 gene product from transcript CG15144-RB(CG15144)	173.641	519.491	-1.581	4.5371e-17	2.7252e-15	sp|Q7Z4T9|CFA91_HUMAN Cilia- and flagella-associated protein 91 OS=Homo sapiens OX=9606 GN=MAATS1 PE=1 SV=3//4.32581e-17
FBgn0267326	Neurotransmitter transporter-like(Ntl)	424.207	1269.21	-1.5811	1.4291e-20	1.637e-18	sp|P28572|SC6A9_RAT Sodium- and chloride-dependent glycine transporter 1 OS=Rattus norvegicus OX=10116 GN=Slc6a9 PE=1 SV=2//1.03723e-137
FBgn0036832	CG18223 gene product from transcript CG18223-RA(CG18223)	104.065	311.691	-1.5826	2.1571e-14	8.2169e-13	sp|O97370|EURM3_EURMA Mite allergen Eur m 3 OS=Euroglyphus maynei OX=6958 GN=EURM3 PE=1 SV=1//6.35976e-20
FBgn0036763	CG7441 gene product from transcript CG7441-RA(CG7441)	2021.46	6055.45	-1.5828	2.4152e-21	3.2825e-19	sp|Q9UGM6|SYWM_HUMAN Tryptophan--tRNA ligase, mitochondrial OS=Homo sapiens OX=9606 GN=WARS2 PE=1 SV=1//1.61101e-111
FBgn0265726	Drosophila Nna1 ortholog(NnaD)	1542.02	4619.23	-1.5828	4.2709e-20	4.3626e-18	sp|Q9VY99|NNAD_DROME Cytosolic carboxypeptidase Nna1 OS=Drosophila melanogaster OX=7227 GN=Nna1 PE=2 SV=2//0
FBgn0003900	twist(twi)	109.265	327.596	-1.5841	1.8342e-11	4.5464e-10	sp|P10627|TWIST_DROME Protein twist OS=Drosophila melanogaster OX=7227 GN=twi PE=1 SV=2//0
FBgn0038934	CG5732 gene product from transcript CG5732-RC(Gld2)	924.997	2773.93	-1.5844	2.8819e-22	5.502e-20	sp|Q9VD44|GLD2A_DROME Poly(A) RNA polymerase gld-2 homolog A OS=Drosophila melanogaster OX=7227 GN=Gld2 PE=1 SV=3//0
FBgn0031240	CG3345 gene product from transcript CG3345-RA(CG3345)	1336.45	4008.78	-1.5848	6.6954e-23	1.6519e-20	sp|Q5CZC0|FSIP2_HUMAN Fibrous sheath-interacting protein 2 OS=Homo sapiens OX=9606 GN=FSIP2 PE=2 SV=4//8.84762e-09
FBgn0039039	lame duck(lmd)	18.5329	55.6095	-1.5852	1.0295e-05	9.7693e-05	sp|Q6XP49|GLIS3_MOUSE Zinc finger protein GLIS3 OS=Mus musculus OX=10090 GN=Glis3 PE=1 SV=2//1.44386e-76
FBgn0033542	CG12309 gene product from transcript CG12309-RA(CG12309)	602.476	1810.91	-1.5877	3.0074e-19	2.593e-17	sp|P00915|CAH1_HUMAN Carbonic anhydrase 1 OS=Homo sapiens OX=9606 GN=CA1 PE=1 SV=2//1.47042e-28
FBgn0034684	CG13501 gene product from transcript CG13501-RB(CG13501)	206.783	622.414	-1.5898	5.2621e-15	2.1976e-13	-//-
FBgn0032964	CG11630 gene product from transcript CG11630-RA(CG11630)	88.7588	267.329	-1.5907	1.4569e-09	2.7423e-08	-//-
FBgn0038266	CG3610 gene product from transcript CG3610-RA(CG3610)	593.241	1787.04	-1.5909	1.6613e-21	2.4001e-19	-//-
FBgn0035461	nutcracker(ntc)	723.809	2182.7	-1.5924	1.1797e-18	9.0959e-17	sp|Q8SX86|NUTC_DROME Protein nutcracker OS=Drosophila melanogaster OX=7227 GN=ntc PE=1 SV=1//0
FBgn0030719	CG9177 gene product from transcript CG9177-RD(eIF5)	13.9361	42.0425	-1.593	8.2029e-05	0.00062583	sp|Q9VXK6|IF5_DROME Eukaryotic translation initiation factor 5 OS=Drosophila melanogaster OX=7227 GN=eIF5 PE=1 SV=1//0
FBgn0053286	CG33286 gene product from transcript CG33286-RB(CG33286)	416.847	1258.03	-1.5936	7.7737e-15	3.1641e-13	-//-
FBgn0039769	CG15534 gene product from transcript CG15534-RA(CG15534)	160.607	484.837	-1.594	2.6901e-12	7.5818e-11	sp|Q04519|ASM_MOUSE Sphingomyelin phosphodiesterase OS=Mus musculus OX=10090 GN=Smpd1 PE=1 SV=2//3.80367e-79
FBgn0260480	CG32295 gene product from transcript CG32295-RA(CG32295)	312.065	942.457	-1.5946	7.3236e-20	7.0752e-18	-//-
FBgn0266676	ncRNA(CR45166)	9.9685	30.1131	-1.5949	0.00068278	0.0040495	-//-
FBgn0004171	Male-specific RNA 98Cb(Mst98Cb)	1743.94	5270.04	-1.5955	4.0313e-22	7.5175e-20	-//-
FBgn0264703	pseudo(CR43972)	29.8629	90.2804	-1.5961	7.6094e-08	1.0714e-06	-//-
FBgn0034824	Kinesin-like protein at 59C(Klp59C)	1431.95	4331	-1.5967	3.049e-23	8.7317e-21	sp|Q9W1U4|KI59C_DROME Kinesin-like protein Klp59C OS=Drosophila melanogaster OX=7227 GN=Klp59C PE=3 SV=1//0
FBgn0052591	CG32591 gene product from transcript CG32591-RB(CG32591)	558.092	1688.42	-1.5971	8.7073e-22	1.4105e-19	-//-
FBgn0037626	CG8236 gene product from transcript CG8236-RA(CG8236)	416.72	1261.16	-1.5976	7.6946e-19	6.2009e-17	-//-
FBgn0263113	CG43370 gene product from transcript CG43370-RD(CG43370)	32.7176	99.1051	-1.5989	1.8005e-06	1.9955e-05	sp|Q8CFW7|C2D2A_MOUSE Coiled-coil and C2 domain-containing protein 2A OS=Mus musculus OX=10090 GN=Cc2d2a PE=1 SV=1//2.50641e-61
FBgn0039070	CG17083 gene product from transcript CG17083-RA(CG17083)	732.105	2219.29	-1.6	2.3575e-22	4.7258e-20	sp|Q8CDV6|CCD63_MOUSE Coiled-coil domain-containing protein 63 OS=Mus musculus OX=10090 GN=Ccdc63 PE=2 SV=2//1.24096e-07
FBgn0031690	CG7742 gene product from transcript CG7742-RD(CG7742)	1334.44	4046.42	-1.6004	2.7439e-23	8.1489e-21	sp|Q8N5T2|TBC19_HUMAN TBC1 domain family member 19 OS=Homo sapiens OX=9606 GN=TBC1D19 PE=1 SV=2//3.34049e-120
FBgn0031208	CG11023 gene product from transcript CG11023-RB(CG11023)	152.227	462.241	-1.6024	1.3582e-15	6.188e-14	sp|Q9P0U3|SENP1_HUMAN Sentrin-specific protease 1 OS=Homo sapiens OX=9606 GN=SENP1 PE=1 SV=2//1.03106e-55
FBgn0053278	CG33278 gene product from transcript CG33278-RA(CG33278)	124.053	376.839	-1.603	8.0547e-16	3.7992e-14	-//-
FBgn0032664	CG5755 gene product from transcript CG5755-RA(CG5755)	195.754	594.676	-1.6031	4.2353e-18	2.9922e-16	sp|Q9CQS4|S2546_MOUSE Solute carrier family 25 member 46 OS=Mus musculus OX=10090 GN=Slc25a46 PE=1 SV=1//3.53056e-73
FBgn0052651	CG32651 gene product from transcript CG32651-RA(CG32651)	239.529	727.843	-1.6034	2.0003e-10	4.2772e-09	-//-
FBgn0004956	unpaired 1(upd1)	29.1154	88.481	-1.6036	8.6342e-08	1.2051e-06	-//-
FBgn0037826	CG14689 gene product from transcript CG14689-RA(CG14689)	546.891	1662.22	-1.6038	8.878e-22	1.4238e-19	sp|Q96LQ0|PPR36_HUMAN Protein phosphatase 1 regulatory subunit 36 OS=Homo sapiens OX=9606 GN=PPP1R36 PE=1 SV=1//3.97894e-07
FBgn0030004	CG10958 gene product from transcript CG10958-RA(CG10958)	276.263	839.76	-1.6039	4.7238e-19	3.9456e-17	sp|Q9W3J8|DRC1_DROME Dynein regulatory complex protein 1 homolog OS=Drosophila melanogaster OX=7227 GN=CG10958 PE=2 SV=1//0
FBgn0027949	CG10364 gene product from transcript CG10364-RA(msb1l)	56.1481	170.699	-1.6041	2.7467e-07	3.4932e-06	-//-
FBgn0031620	CG11929 gene product from transcript CG11929-RA(CG11929)	571.29	1736.99	-1.6043	6.1005e-22	1.0751e-19	-//-
FBgn0034352	CG17669 gene product from transcript CG17669-RA(CG17669)	99.5133	302.7	-1.6049	2.0593e-09	3.8179e-08	sp|A1ZB91|DAAF3_DROME Dynein assembly factor 3, axonemal homolog OS=Drosophila melanogaster OX=7227 GN=CG17669 PE=2 SV=1//0
FBgn0032771	CG17349 gene product from transcript CG17349-RA(CG17349)	732.995	2232.44	-1.6067	1.5233e-22	3.2143e-20	sp|Q9DAK2|PACRG_MOUSE Parkin coregulated gene protein homolog OS=Mus musculus OX=10090 GN=Pacrg PE=1 SV=1//2.90015e-46
FBgn0034435	CG9975 gene product from transcript CG9975-RA(CG9975)	1740.05	5299.41	-1.6067	3.9271e-15	1.6839e-13	-//-
FBgn0052846	CG32846 gene product from transcript CG32846-RB(CG32846)	122.368	372.765	-1.607	1.4995e-09	2.8192e-08	-//-
FBgn0034829	CG9899 gene product from transcript CG9899-RA(CG9899)	28.4781	86.9288	-1.61	0.00047831	0.00297	sp|Q6PD62|CTR9_HUMAN RNA polymerase-associated protein CTR9 homolog OS=Homo sapiens OX=9606 GN=CTR9 PE=1 SV=1//9.44511e-88
FBgn0035380	CG9970 gene product from transcript CG9970-RA(CG9970)	685.694	2094.73	-1.6111	1.6375e-22	3.4104e-20	-//-
FBgn0037420	CG15597 gene product from transcript CG15597-RB(CG15597)	14.9115	45.5904	-1.6123	3.7417e-05	0.00030931	-//-
FBgn0032632	CG6380 gene product from transcript CG6380-RB(CG6380)	404.417	1236.53	-1.6124	3.1069e-21	4.1177e-19	sp|P11845|IPP2_RABIT Protein phosphatase inhibitor 2 OS=Oryctolagus cuniculus OX=9986 GN=PPP1R2 PE=1 SV=3//2.76273e-16
FBgn0011270	CG17645 gene product from transcript CG17645-RA(Pglym87)	2016.53	6179.59	-1.6156	2.1691e-17	1.3675e-15	sp|O70250|PGAM2_MOUSE Phosphoglycerate mutase 2 OS=Mus musculus OX=10090 GN=Pgam2 PE=1 SV=3//2.1211e-121
FBgn0052252	ncRNA(CR32252)	85.9398	263.748	-1.6178	5.7956e-14	2.0563e-12	-//-
FBgn0267040	ncRNA(CR45484)	6.91306	21.22	-1.618	0.0039607	0.018472	-//-
FBgn0265718	ncRNA(CR44525)	10.9893	33.7543	-1.619	0.00034998	0.0022705	-//-
FBgn0011606	Kinesin-like protein at 3A(Klp3A)	596.256	1832.32	-1.6197	2.9296e-11	7.0439e-10	sp|O95239|KIF4A_HUMAN Chromosome-associated kinesin KIF4A OS=Homo sapiens OX=9606 GN=KIF4A PE=1 SV=3//4.70298e-165
FBgn0036608	CG13040 gene product from transcript CG13040-RB(CG13040)	5.28096	16.2447	-1.6211	0.011357	0.044773	-//-
FBgn0050416	CG30416 gene product from transcript CG30416-RB(CG30416)	168.111	517.405	-1.6219	2.3339e-11	5.6796e-10	-//-
FBgn0015574	alpha-Esterase-6(alpha-Est6)	147.535	454.398	-1.6229	3.8364e-17	2.3483e-15	sp|P16854|EST1_CULPI Esterase B1 OS=Culex pipiens OX=7175 GN=B1 PE=3 SV=1//9.60129e-91
FBgn0052681	CG32681 gene product from transcript CG32681-RA(CG32681)	76.397	235.804	-1.626	9.4746e-11	2.1045e-09	-//-
FBgn0038377	CG9632 gene product from transcript CG9632-RA(CG9632)	850.795	2628.75	-1.6275	2.5281e-23	7.7967e-21	-//-
FBgn0031905	CG5155 gene product from transcript CG5155-RA(gudu)	235.461	728.439	-1.6293	1.6425e-19	1.4967e-17	sp|Q9VM21|GUDU_DROME Armadillo repeat-containing protein gudu OS=Drosophila melanogaster OX=7227 GN=gudu PE=2 SV=1//0
FBgn0034624	CG17974 gene product from transcript CG17974-RA(CG17974)	6.99831	21.651	-1.6294	0.0032814	0.015751	sp|P35778|VA3_SOLIN Venom allergen 3 OS=Solenopsis invicta OX=13686 PE=1 SV=2//3.69373e-16
FBgn0052026	CG32026 gene product from transcript CG32026-RA(CG32026)	695.264	2153.38	-1.631	8.1143e-22	1.3279e-19	sp|Q9VWH4|IDH3A_DROME Probable isocitrate dehydrogenase [NAD] subunit alpha, mitochondrial OS=Drosophila melanogaster OX=7227 GN=l(1)G0156 PE=2 SV=1//2.35613e-153
FBgn0034292	CG5767 gene product from transcript CG5767-RA(CG5767)	38.1951	118.359	-1.6317	2.2521e-06	2.4486e-05	-//-
FBgn0033954	CG12860 gene product from transcript CG12860-RA(CG12860)	9091.72	28181.5	-1.6321	4.0873e-15	1.7433e-13	-//-
FBgn0030823	CG8918 gene product from transcript CG8918-RA(CG8918)	99.1052	307.564	-1.6339	4.8526e-15	2.0479e-13	sp|O95922|TTLL1_HUMAN Probable tubulin polyglutamylase TTLL1 OS=Homo sapiens OX=9606 GN=TTLL1 PE=2 SV=1//4.87215e-151
FBgn0004882	oo18 RNA-binding protein(orb)	1686.33	5237.36	-1.635	6.8249e-16	3.2478e-14	sp|Q52KN7|CPE1B_XENLA Cytoplasmic polyadenylation element-binding protein 1-B OS=Xenopus laevis OX=8355 GN=cpeb1-b PE=2 SV=1//3.04426e-118
FBgn0021760	chromosome bows(chb)	1987.27	6174.44	-1.6355	2.0224e-19	1.8324e-17	sp|Q9NBD7|CLASP_DROME CLIP-associating protein OS=Drosophila melanogaster OX=7227 GN=chb PE=1 SV=1//0
FBgn0004581	benign gonial cell neoplasm(bgcn)	110.421	343.339	-1.6366	1.0809e-11	2.778e-10	sp|Q9W1I2|BGCN_DROME Benign gonial cell neoplasm protein OS=Drosophila melanogaster OX=7227 GN=bgcn PE=1 SV=2//0
FBgn0000615	exuperantia(exu)	6952.93	21621.5	-1.6368	4.8008e-21	6.0623e-19	sp|P28750|EXU_DROME Maternal protein exuperantia OS=Drosophila melanogaster OX=7227 GN=exu PE=1 SV=2//0
FBgn0031741	CG11034 gene product from transcript CG11034-RC(CG11034)	59.2712	184.362	-1.6371	2.6218e-09	4.7942e-08	sp|B2D0J4|VDPP4_APIME Venom dipeptidyl peptidase 4 OS=Apis mellifera OX=7460 PE=1 SV=1//4.71169e-165
FBgn0262610	CG43136 gene product from transcript CG43136-RA(CG43136)	32.4869	101.134	-1.6383	1.0598e-08	1.7522e-07	-//-
FBgn0011693	Photoreceptor dehydrogenase(Pdh)	1477.6	4607.78	-1.6408	2.7392e-08	4.1717e-07	sp|P54398|FBP2_DROME Fat body protein 2 OS=Drosophila melanogaster OX=7227 GN=Fbp2 PE=2 SV=2//5.98147e-47
FBgn0032269	world cup(w-cup)	2186.93	6829.16	-1.6428	1.8142e-21	2.5747e-19	-//-
FBgn0050177	CG30177 gene product from transcript CG30177-RA(CG30177)	292.944	914.931	-1.643	1.3147e-19	1.2117e-17	sp|Q4KMI4|REEP2_DANRE Receptor expression-enhancing protein 2 OS=Danio rerio OX=7955 GN=reep2 PE=2 SV=1//1.35257e-06
FBgn0002571	Maltase A3(Mal-A3)	192.37	601.189	-1.6439	4.6129e-19	3.8936e-17	sp|P07192|MAL3_DROME Maltase A3 OS=Drosophila melanogaster OX=7227 GN=Mal-A3 PE=2 SV=2//0
FBgn0032650	CG7094 gene product from transcript CG7094-RA(CG7094)	269.466	842.966	-1.6454	1.761e-20	1.9612e-18	sp|Q8BK63|KC1A_MOUSE Casein kinase I isoform alpha OS=Mus musculus OX=10090 GN=Csnk1a1 PE=1 SV=2//4.23019e-137
FBgn0263448	ncRNA(CR43471)	27.4641	86.0444	-1.6475	5.8247e-08	8.4001e-07	-//-
FBgn0020399	CG6864 gene product from transcript CG6864-RA(Mst89B)	278.547	873.782	-1.6494	5.0348e-17	2.9927e-15	-//-
FBgn0038073	CG14395 gene product from transcript CG14395-RD(CG14395)	67.1856	211.199	-1.6524	4.6084e-13	1.4295e-11	-//-
FBgn0029603	CG14053 gene product from transcript CG14053-RB(CG14053)	92.7978	291.782	-1.6527	4.9099e-15	2.0667e-13	-//-
FBgn0039501	CG5987 gene product from transcript CG5987-RA(CG5987)	1200.82	3775.55	-1.6527	1.5661e-24	6.9766e-22	sp|A4Q9F6|TTL13_MOUSE Tubulin polyglutamylase TTLL13 OS=Mus musculus OX=10090 GN=Ttll13 PE=2 SV=1//6.70467e-144
FBgn0033900	CG8257 gene product from transcript CG8257-RB(CG8257)	714.832	2248.05	-1.653	1.2087e-23	4.1243e-21	sp|Q2KIF8|SYCM_BOVIN Cysteine--tRNA ligase, mitochondrial OS=Bos taurus OX=9913 GN=CARS2 PE=2 SV=1//1.66332e-120
FBgn0051465	CG31465 gene product from transcript CG31465-RB(CG31465)	83.8169	263.862	-1.6545	1.0655e-05	0.00010075	-//-
FBgn0011244	Heat shock protein 60 related(Hsp60B)	2916.18	9190.4	-1.656	3.3914e-20	3.6019e-18	sp|Q9VPS5|CH60B_DROME 60 kDa heat shock protein homolog 1, mitochondrial OS=Drosophila melanogaster OX=7227 GN=Hsp60B PE=2 SV=1//2.49241e-11
FBgn0036029	CG16719 gene product from transcript CG16719-RA(CG16719)	323.384	1020.34	-1.6577	1.3093e-21	1.9624e-19	sp|Q9Y4P9|SPEF1_HUMAN Sperm flagellar protein 1 OS=Homo sapiens OX=9606 GN=SPEF1 PE=1 SV=3//4.98827e-11
FBgn0032109	CG17005 gene product from transcript CG17005-RE(CG17005)	110.321	348.15	-1.658	1.1234e-10	2.4612e-09	-//-
FBgn0038690	CG11703 gene product from transcript CG11703-RA(CG11703)	155.45	490.843	-1.6588	3.1469e-16	1.6072e-14	sp|Q24048|ATPB2_DROME Sodium/potassium-transporting ATPase subunit beta-2 OS=Drosophila melanogaster OX=7227 GN=nrv2 PE=1 SV=2//4.32747e-22
FBgn0036329	CG11262 gene product from transcript CG11262-RA(CG11262)	427.426	1350.18	-1.6594	1.18e-17	7.6922e-16	sp|Q62052|P_MOUSE P protein OS=Mus musculus OX=10090 GN=Oca2 PE=1 SV=1//9.75782e-95
FBgn0034251	NADH dehydrogenase (ubiquinone) 51 kDa subunit-like 1(ND-51L1)	92.0368	290.886	-1.6602	2.7101e-08	4.1353e-07	sp|P25708|NDUV1_BOVIN NADH dehydrogenase [ubiquinone] flavoprotein 1, mitochondrial OS=Bos taurus OX=9913 GN=NDUFV1 PE=1 SV=2//0
FBgn0029945	CG18155 gene product from transcript CG18155-RB(CG18155)	275.552	873.269	-1.6641	4.2841e-16	2.1271e-14	sp|Q4G176|ACSF3_HUMAN Acyl-CoA synthetase family member 3, mitochondrial OS=Homo sapiens OX=9606 GN=ACSF3 PE=1 SV=3//3.63855e-72
FBgn0264077	Calnexin 14D(Cnx14D)	12.9153	40.9791	-1.6658	0.0010415	0.0058482	sp|P35564|CALX_MOUSE Calnexin OS=Mus musculus OX=10090 GN=Canx PE=1 SV=1//1.31353e-158
FBgn0033283	CG11635 gene product from transcript CG11635-RA(CG11635)	361.689	1149.58	-1.6683	3.1496e-22	5.9423e-20	-//-
FBgn0031139	CG11227 gene product from transcript CG11227-RC(CG11227)	189.427	602.395	-1.6691	1.0161e-13	3.4091e-12	-//-
FBgn0038008	CG3942 gene product from transcript CG3942-RA(CG3942)	447.47	1423.88	-1.67	6.9373e-23	1.6857e-20	sp|Q9NPB8|GPCP1_HUMAN Glycerophosphocholine phosphodiesterase GPCPD1 OS=Homo sapiens OX=9606 GN=GPCPD1 PE=1 SV=2//4.33381e-51
FBgn0037398	CG15580 gene product from transcript CG15580-RA(CG15580)	203.789	648.938	-1.671	8.047e-11	1.8125e-09	sp|A6H639|DRC5_MOUSE Dynein regulatory complex subunit 5 OS=Mus musculus OX=10090 GN=Tcte1 PE=1 SV=1//2.23402e-09
FBgn0039511	CG3330 gene product from transcript CG3330-RA(CG3330)	1199.11	3821.93	-1.6723	3.728e-25	2.2143e-22	-//-
FBgn0085337	CG34308 gene product from transcript CG34308-RB(CG34308)	85.5397	272.698	-1.6726	9.4918e-11	2.1054e-09	sp|Q91YT2|RN185_MOUSE E3 ubiquitin-protein ligase RNF185 OS=Mus musculus OX=10090 GN=Rnf185 PE=2 SV=1//6.20366e-07
FBgn0052106	CG32106 gene product from transcript CG32106-RD(CG32106)	189.751	605.203	-1.6733	7.5765e-08	1.0686e-06	-//-
FBgn0028899	CG31817 gene product from transcript CG31817-RB(CG31817)	185.421	592.004	-1.6748	1.8412e-06	2.0391e-05	-//-
FBgn0034011	CG8160 gene product from transcript CG8160-RA(CG8160)	8.6565	27.6678	-1.6764	0.00063823	0.0038177	-//-
FBgn0033819	CG4714 gene product from transcript CG4714-RA(CG4714)	351.984	1125.28	-1.6767	1.0326e-16	5.8515e-15	-//-
FBgn0261998	CG42816 gene product from transcript CG42816-RB(CG42816)	123.858	396.367	-1.6781	1.1181e-10	2.4529e-09	sp|Q99758|ABCA3_HUMAN ATP-binding cassette sub-family A member 3 OS=Homo sapiens OX=9606 GN=ABCA3 PE=1 SV=2//4.28977e-29
FBgn0037147	CG7140 gene product from transcript CG7140-RB(CG7140)	806.139	2579.97	-1.6783	1.4323e-24	6.5629e-22	sp|P12646|G6PD_DROME Glucose-6-phosphate 1-dehydrogenase OS=Drosophila melanogaster OX=7227 GN=Zw PE=1 SV=2//6.4491e-137
FBgn0036403	CG6661 gene product from transcript CG6661-RA(CG6661)	1403.86	4497.58	-1.6798	5.7877e-14	2.0563e-12	sp|P30038|AL4A1_HUMAN Delta-1-pyrroline-5-carboxylate dehydrogenase, mitochondrial OS=Homo sapiens OX=9606 GN=ALDH4A1 PE=1 SV=3//2.38959e-118
FBgn0036931	CG14183 gene product from transcript CG14183-RA(CG14183)	487.277	1561.58	-1.6802	1.088e-14	4.3622e-13	sp|A6NCM1|IQCAL_HUMAN IQ and AAA domain-containing protein 1-like OS=Homo sapiens OX=9606 GN=IQCA1L PE=3 SV=3//1.71e-58
FBgn0033174	CG11125 gene product from transcript CG11125-RC(CG11125)	516.145	1656.67	-1.6824	1.2653e-20	1.4812e-18	sp|Q7TSV9|ENKD1_MOUSE Enkurin domain-containing protein 1 OS=Mus musculus OX=10090 GN=Enkd1 PE=1 SV=1//8.0213e-12
FBgn0264086	CG43755 gene product from transcript CG43755-RD(CG43755)	2310.39	7416.79	-1.6827	7.4875e-23	1.7922e-20	-//-
FBgn0011596	fuzzy onions(fzo)	226.178	726.29	-1.6831	8.5057e-13	2.5449e-11	sp|O18412|FZO_DROME Transmembrane GTPase fzo OS=Drosophila melanogaster OX=7227 GN=fzo PE=1 SV=2//0
FBgn0039703	CG7829 gene product from transcript CG7829-RA(CG7829)	57.4688	184.659	-1.684	1.1807e-12	3.4489e-11	sp|P35037|TRY3_ANOGA Trypsin-3 OS=Anopheles gambiae OX=7165 GN=TRYP3 PE=2 SV=5//1.89775e-56
FBgn0032590	CG4631 gene product from transcript CG4631-RA(CG4631)	1431.95	4603.45	-1.6847	1.2169e-25	8.1312e-23	-//-
FBgn0030242	sister of feo(sofe)	342.114	1100.27	-1.6853	2.1701e-22	4.4053e-20	sp|O43663|PRC1_HUMAN Protein regulator of cytokinesis 1 OS=Homo sapiens OX=9606 GN=PRC1 PE=1 SV=2//5.71211e-33
FBgn0031724	CG18266 gene product from transcript CG18266-RA(CG18266)	794.383	2555.63	-1.6858	6.9152e-22	1.1925e-19	-//-
FBgn0025111	Adenine nucleotide translocase 2(Ant2)	1158.91	3729.55	-1.6862	2.1104e-25	1.3017e-22	sp|Q26365|ADT_DROME ADP,ATP carrier protein OS=Drosophila melanogaster OX=7227 GN=sesB PE=2 SV=4//1.95023e-164
FBgn0267745	ncRNA(CR46076)	9.28434	29.8841	-1.6865	0.00043251	0.0027275	-//-
FBgn0051924	CG31924 gene product from transcript CG31924-RB(CG31924)	131.211	422.753	-1.6879	8.8991e-18	5.8973e-16	sp|Q94529|GS1_DROME Probable pseudouridine-5&apos;-phosphatase OS=Drosophila melanogaster OX=7227 GN=Gs1l PE=2 SV=2//1.57151e-65
FBgn0039088	CG10164 gene product from transcript CG10164-RB(CG10164)	665.6	2151.76	-1.6928	1.1418e-24	5.3854e-22	-//-
FBgn0003254	ribbon(rib)	50.8193	164.315	-1.693	4.8596e-12	1.3232e-10	sp|Q7KQZ4|LOLA3_DROME Longitudinals lacking protein, isoforms A/B/D/L OS=Drosophila melanogaster OX=7227 GN=lola PE=1 SV=1//2.0524e-23
FBgn0030623	Protein phosphatase Y regulator 1(PPYR1)	67.7625	219.19	-1.6936	1.0208e-08	1.6912e-07	-//-
FBgn0034827	Kinesin-like protein at 59D(Klp59D)	638.226	2066.02	-1.6947	8.6991e-19	6.9063e-17	sp|Q960Z0|KI10A_DROME Kinesin-like protein Klp10A OS=Drosophila melanogaster OX=7227 GN=Klp10A PE=1 SV=1//0
FBgn0035124	tiny tim 2(ttm2)	562.109	1822.96	-1.6974	2.065e-22	4.2458e-20	sp|Q9W0S3|TI50B_DROME Mitochondrial import inner membrane translocase subunit TIM50-B OS=Drosophila melanogaster OX=7227 GN=ttm2 PE=2 SV=1//0
FBgn0050378	CG30378 gene product from transcript CG30378-RA(CG30378)	630.214	2044.48	-1.6978	4.3094e-23	1.1916e-20	sp|Q7DMN9|CALM5_SOLTU Calmodulin-5/6/7/8 OS=Solanum tuberosum OX=4113 GN=PCM5 PE=1 SV=3//4.2055e-37
FBgn0031878	septin interacting protein 2(sip2)	1258.62	4094.67	-1.7019	6.4182e-21	7.979e-19	-//-
FBgn0031853	Tubulin tyrosine ligase-like 3B(TTLL3B)	1285.83	4183.64	-1.7021	4.7536e-21	6.0503e-19	sp|Q9VM92|TTL3B_DROME Tubulin glycylase 3B OS=Drosophila melanogaster OX=7227 GN=TTLL3B PE=1 SV=2//0
FBgn0037916	CG5342 gene product from transcript CG5342-RB(CG5342)	15.2591	49.6518	-1.7022	0.0029526	0.014375	sp|Q9R1S3|PIGN_MOUSE GPI ethanolamine phosphate transferase 1 OS=Mus musculus OX=10090 GN=Pign PE=2 SV=2//1.99088e-33
FBgn0039651	Cytochrome c1-like(Cyt-c1L)	248.452	809.672	-1.7044	1.407e-21	2.0702e-19	sp|P00125|CY1_BOVIN Cytochrome c1, heme protein, mitochondrial OS=Bos taurus OX=9913 GN=CYC1 PE=1 SV=2//1.50957e-95
FBgn0036325	CG10752 gene product from transcript CG10752-RA(CG10752)	51.4812	167.869	-1.7052	1.8376e-08	2.8891e-07	sp|P28575|IPP_MOUSE Actin-binding protein IPP OS=Mus musculus OX=10090 GN=Ipp PE=2 SV=3//1.23888e-08
FBgn0036024	CG18180 gene product from transcript CG18180-RA(CG18180)	104.749	341.755	-1.706	7.7528e-09	1.3199e-07	sp|C0HKF8|SER2_DROME Serine protease 2 OS=Drosophila melanogaster OX=7227 GN=Jon99Ciii PE=2 SV=1//1.07519e-61
FBgn0052301	CG32301 gene product from transcript CG32301-RB(CG32301)	73.7634	240.848	-1.7071	8.962e-14	3.045e-12	sp|P51828|ADCY7_HUMAN Adenylate cyclase type 7 OS=Homo sapiens OX=9606 GN=ADCY7 PE=1 SV=1//2.08263e-07
FBgn0265625	CG44433 gene product from transcript CG44433-RA(CG44433)	286.9	936.769	-1.7071	1.5626e-18	1.182e-16	-//-
FBgn0051029	CG31029 gene product from transcript CG31029-RA(CG31029)	3299.83	10791.6	-1.7094	5.3846e-24	2.056e-21	-//-
FBgn0028561	sugar transporter 3(sut3)	193.476	632.692	-1.7094	2.8975e-15	1.2559e-13	sp|P47843|GTR3_SHEEP Solute carrier family 2, facilitated glucose transporter member 3 OS=Ovis aries OX=9940 GN=SLC2A3 PE=2 SV=1//7.37145e-58
FBgn0029679	CG2901 gene product from transcript CG2901-RA(CG2901)	65.6071	215.023	-1.7126	7.1226e-14	2.4736e-12	sp|Q9UBH6|XPR1_HUMAN Xenotropic and polytropic retrovirus receptor 1 OS=Homo sapiens OX=9606 GN=XPR1 PE=1 SV=1//1.1044e-150
FBgn0032478	CG5458 gene product from transcript CG5458-RA(CG5458)	282.059	924.655	-1.7129	2.5192e-22	4.9878e-20	sp|Q8WYR4|RSPH1_HUMAN Radial spoke head 1 homolog OS=Homo sapiens OX=9606 GN=RSPH1 PE=1 SV=1//1.30651e-11
FBgn0038993	CG13843 gene product from transcript CG13843-RA(CG13843)	135.678	444.992	-1.7136	1.0459e-16	5.8852e-15	-//-
FBgn0042178	CG32165 gene product from transcript CG32165-RC(CG32165)	329.959	1086.09	-1.7188	5.6506e-11	1.2854e-09	sp|Q8TEX9|IPO4_HUMAN Importin-4 OS=Homo sapiens OX=9606 GN=IPO4 PE=1 SV=2//9.87919e-92
FBgn0263328	ncRNA(CR43409)	5.66706	18.6606	-1.7193	0.0082441	0.034029	-//-
FBgn0029730	CG12681 gene product from transcript CG12681-RA(CG12681)	150.201	494.933	-1.7203	4.1611e-18	2.9659e-16	-//-
FBgn0051327	CG31327 gene product from transcript CG31327-RA(CG31327)	364.146	1201.25	-1.7219	1.5102e-14	5.9505e-13	-//-
FBgn0028935	CG7653 gene product from transcript CG7653-RB(CG7653)	269.129	887.785	-1.7219	3.1422e-13	9.9589e-12	sp|Q6Q4G3|AMPQ_HUMAN Aminopeptidase Q OS=Homo sapiens OX=9606 GN=LVRN PE=1 SV=4//5.56354e-73
FBgn0265728	ncRNA(CR44535)	50.2148	165.677	-1.7222	2.254e-12	6.4091e-11	-//-
FBgn0267625	ncRNA(CR45963)	9.59891	31.6815	-1.7227	0.0030079	0.014612	-//-
FBgn0037985	short spindle 5(ssp5)	1993.27	6580.55	-1.7231	2.3613e-18	1.7213e-16	-//-
FBgn0035856	CG13679 gene product from transcript CG13679-RB(CG13679)	28.3543	93.6717	-1.724	2.0221e-06	2.2242e-05	-//-
FBgn0050485	CG30485 gene product from transcript CG30485-RA(CG30485)	129.297	427.522	-1.7253	4.7862e-13	1.4789e-11	-//-
FBgn0050278	CG30278 gene product from transcript CG30278-RC(CG30278)	480.559	1589.24	-1.7255	1.8514e-24	8.0244e-22	-//-
FBgn0051099	CG31099 gene product from transcript CG31099-RA(CG31099)	357.919	1183.77	-1.7257	1.3566e-23	4.4399e-21	-//-
FBgn0045770	Sperm-Leucylaminopeptidase 3(S-Lap3)	5670.46	18754.7	-1.7257	2.4978e-23	7.7967e-21	sp|Q5XGB9|AMPL_XENTR Cytosol aminopeptidase OS=Xenopus tropicalis OX=8364 GN=lap3 PE=2 SV=1//5.07844e-106
FBgn0053233	CG33233 gene product from transcript CG33233-RC(CG33233)	280.66	928.308	-1.7258	1.3188e-22	2.9788e-20	sp|Q7L1I2|SV2B_HUMAN Synaptic vesicle glycoprotein 2B OS=Homo sapiens OX=9606 GN=SV2B PE=1 SV=1//4.1554e-13
FBgn0050271	CG30271 gene product from transcript CG30271-RI(CG30271)	322.482	1067.41	-1.7268	1.2519e-21	1.9121e-19	-//-
FBgn0051025	Protein phosphatase 1c interacting protein 1(Ppi1)	4901.24	16259.9	-1.7301	1.1769e-23	4.1031e-21	-//-
FBgn0263036	CG43331 gene product from transcript CG43331-RA(CG43331)	125.464	416.323	-1.7304	1.755e-18	1.3075e-16	-//-
FBgn0284250		15.5421	51.5748	-1.7305	5.1177e-06	5.1488e-05	sp|A1Z9R4|ZN423_DROME Zinc finger protein 423 homolog OS=Drosophila melanogaster OX=7227 GN=Oaz PE=2 SV=2//0
FBgn0037862	CG4706 gene product from transcript CG4706-RA(CG4706)	716.024	2377.29	-1.7312	6.5393e-21	8.0429e-19	sp|P34455|ACON_CAEEL Probable aconitate hydratase, mitochondrial OS=Caenorhabditis elegans OX=6239 GN=aco-2 PE=3 SV=2//0
FBgn0031728	CG7235 gene product from transcript CG7235-RA(Hsp60C)	3912.93	12997	-1.7319	1.5135e-22	3.2143e-20	sp|Q9VMN5|CH60C_DROME 60 kDa heat shock protein homolog 2, mitochondrial OS=Drosophila melanogaster OX=7227 GN=Hsp60C PE=2 SV=2//0
FBgn0035780	CG18417 gene product from transcript CG18417-RA(CG18417)	12.9428	43.0021	-1.7323	4.2731e-05	0.00034768	sp|P04069|CBPB_ASTAS Carboxypeptidase B OS=Astacus astacus OX=6715 PE=1 SV=1//8.08481e-73
FBgn0035857	CG8006 gene product from transcript CG8006-RA(CG8006)	291.165	967.566	-1.7325	6.061e-23	1.5429e-20	-//-
FBgn0027795	CG14785 gene product from transcript CG14785-RA(CG14785)	241.971	804.764	-1.7337	1.7361e-10	3.7373e-09	-//-
FBgn0031546	CG8851 gene product from transcript CG8851-RC(CG8851)	580.508	1931.62	-1.7344	2.1744e-17	1.3675e-15	-//-
FBgn0039425	CG5432 gene product from transcript CG5432-RA(CG5432)	748.591	2493.3	-1.7358	9.3096e-16	4.315e-14	sp|P07764|ALF_DROME Fructose-bisphosphate aldolase OS=Drosophila melanogaster OX=7227 GN=Ald PE=1 SV=5//1.30122e-179
FBgn0034459	CG16716 gene product from transcript CG16716-RC(CG16716)	783.951	2611.59	-1.7361	4.0692e-26	3.1075e-23	sp|Q8N841|TTLL6_HUMAN Tubulin polyglutamylase TTLL6 OS=Homo sapiens OX=9606 GN=TTLL6 PE=1 SV=2//4.14516e-122
FBgn0030975	Succinate dehydrogenase, subunit B (iron-sulfur)-like(SdhBL)	591.741	1972.45	-1.737	3.3546e-15	1.4462e-13	sp|P21914|SDHB_DROME Succinate dehydrogenase [ubiquinone] iron-sulfur subunit, mitochondrial OS=Drosophila melanogaster OX=7227 GN=SdhB PE=2 SV=2//6.96186e-124
FBgn0034467	CG15128 gene product from transcript CG15128-RA(CG15128)	1150.24	3835.25	-1.7374	5.0842e-23	1.3366e-20	-//-
FBgn0011278	ladybird early(lbe)	4.33581	14.4574	-1.7374	0.010526	0.041993	sp|Q0P4H6|LBX1_XENTR Transcription factor LBX1 OS=Xenopus tropicalis OX=8364 GN=lbx1 PE=2 SV=1//4.15706e-38
FBgn0050275	CG30275 gene product from transcript CG30275-RM(CG30275)	204.668	682.896	-1.7384	5.4826e-11	1.2507e-09	sp|Q8NHU2|CFA61_HUMAN Cilia- and flagella-associated protein 61 OS=Homo sapiens OX=9606 GN=CFAP61 PE=2 SV=3//5.31126e-06
FBgn0038163	CG10841 gene product from transcript CG10841-RA(CG10841)	1260.2	4206.38	-1.7389	5.5892e-27	5.6022e-24	-//-
FBgn0035426	CG12078 gene product from transcript CG12078-RB(CG12078)	105.552	352.539	-1.7398	9.2523e-13	2.7376e-11	sp|Q29I63|CNEP1_DROPS CTD nuclear envelope phosphatase 1 homolog OS=Drosophila pseudoobscura pseudoobscura OX=46245 GN=l(1)G0269 PE=3 SV=1//1.64134e-51
FBgn0267689	CG46025 gene product from transcript CG46025-RC(CG46025)	598.033	1998.69	-1.7408	1.3764e-25	8.8294e-23	-//-
FBgn0013811	Dynein heavy chain at 62B(Dhc62B)	145.58	486.922	-1.7419	9.1532e-10	1.775e-08	sp|Q8WXX0|DYH7_HUMAN Dynein heavy chain 7, axonemal OS=Homo sapiens OX=9606 GN=DNAH7 PE=1 SV=2//0
FBgn0031279	CG3544 gene product from transcript CG3544-RB(CG3544)	281.453	942.283	-1.7433	6.4937e-17	3.8007e-15	sp|Q03042|KGP1_DROME cGMP-dependent protein kinase, isozyme 1 OS=Drosophila melanogaster OX=7227 GN=Pkg21D PE=1 SV=2//3.61868e-57
FBgn0039887	CG2053 gene product from transcript CG2053-RB(CG2053)	90.1657	301.912	-1.7435	1.2224e-16	6.7368e-15	sp|Q5PQL2|CNOT9_RAT CCR4-NOT transcription complex subunit 9 OS=Rattus norvegicus OX=10116 GN=Cnot9 PE=1 SV=1//4.07477e-59
FBgn0039010	CG4907 gene product from transcript CG4907-RA(CG4907)	497.7	1666.67	-1.7436	4.5513e-22	8.3895e-20	sp|Q9R1S3|PIGN_MOUSE GPI ethanolamine phosphate transferase 1 OS=Mus musculus OX=10090 GN=Pign PE=2 SV=2//3.16001e-56
FBgn0035638	Tektin C(Tektin-C)	423.082	1420.34	-1.7472	4.6645e-24	1.8701e-21	sp|Q969V4|TEKT1_HUMAN Tektin-1 OS=Homo sapiens OX=9606 GN=TEKT1 PE=1 SV=1//9.37614e-54
FBgn0038247	Cadherin 88C(Cad88C)	8.30617	27.8914	-1.7476	0.00039078	0.0024888	sp|P58365|CAD23_RAT Cadherin-23 OS=Rattus norvegicus OX=10116 GN=Cdh23 PE=2 SV=1//8.84879e-14
FBgn0037254	CG14651 gene product from transcript CG14651-RB(CG14651)	120.729	405.714	-1.7487	6.9697e-18	4.7563e-16	sp|E9Q8T7|DYH1_MOUSE Dynein heavy chain 1, axonemal OS=Mus musculus OX=10090 GN=Dnah1 PE=1 SV=1//1.99043e-95
FBgn0036652	CG13032 gene product from transcript CG13032-RA(CG13032)	484	1627.18	-1.7493	1.9069e-16	1.006e-14	sp|Q8IYE1|CCD13_HUMAN Coiled-coil domain-containing protein 13 OS=Homo sapiens OX=9606 GN=CCDC13 PE=1 SV=2//6.50655e-14
FBgn0028887	CG3491 gene product from transcript CG3491-RA(CG3491)	24.8072	83.6656	-1.7539	0.00020571	0.0014208	sp|Q5BJL5|SBNO1_RAT Protein strawberry notch homolog 1 OS=Rattus norvegicus OX=10116 GN=Sbno1 PE=1 SV=2//0
FBgn0028560	sugar transporter 4(sut4)	933.316	3147.71	-1.7539	6.1658e-27	5.8165e-24	sp|B0WC46|TRET1_CULQU Facilitated trehalose transporter Tret1 OS=Culex quinquefasciatus OX=7176 GN=Tret1 PE=3 SV=1//1.82371e-86
FBgn0029750	CG3323 gene product from transcript CG3323-RA(CG3323)	432.976	1463.17	-1.7567	1.7181e-14	6.6875e-13	-//-
FBgn0053340	CG33340 gene product from transcript CG33340-RA(CG33340)	4811.56	16268.3	-1.7575	9.2567e-26	6.4543e-23	-//-
FBgn0085454	CG34425 gene product from transcript CG34425-RA(CG34425)	389.789	1317.88	-1.7575	1.0189e-24	4.9517e-22	-//-
FBgn0037512	CG2616 gene product from transcript CG2616-RB(CG2616)	289	977.875	-1.7586	1.3283e-23	4.438e-21	sp|Q6P316|S2540_XENTR Solute carrier family 25 member 40 OS=Xenopus tropicalis OX=8364 GN=slc25a40 PE=2 SV=1//1.77511e-90
FBgn0038451	CG14893 gene product from transcript CG14893-RB(CG14893)	73.7664	250.262	-1.7624	5.0718e-15	2.1237e-13	sp|Q8MS59|WAT_DROME Fatty acyl-CoA reductase wat OS=Drosophila melanogaster OX=7227 GN=wat PE=1 SV=1//6.34912e-137
FBgn0034121	CG6262 gene product from transcript CG6262-RB(CG6262)	1855.08	6294.39	-1.7626	4.0496e-28	5.4119e-25	sp|Q9W2M2|TREA_DROME Trehalase OS=Drosophila melanogaster OX=7227 GN=Treh PE=1 SV=1//1.21717e-173
FBgn0032424	CG17010 gene product from transcript CG17010-RA(CG17010)	544.05	1847.56	-1.7638	4.8897e-23	1.3116e-20	sp|Q8R1Q9|RBSK_MOUSE Ribokinase OS=Mus musculus OX=10090 GN=Rbks PE=1 SV=1//4.08204e-52
FBgn0029702	CG15572 gene product from transcript CG15572-RA(CG15572)	375.638	1275.84	-1.764	2.3984e-23	7.6927e-21	-//-
FBgn0031856	CG11322 gene product from transcript CG11322-RB(CG11322)	58.8024	199.999	-1.766	2.5903e-06	2.7805e-05	-//-
FBgn0263999	CG43742 gene product from transcript CG43742-RB(CG43742)	27.8764	94.8454	-1.7665	3.0504e-09	5.5305e-08	sp|Q9VB68|GRASS_DROME Serine protease grass OS=Drosophila melanogaster OX=7227 GN=grass PE=1 SV=1//1.00784e-31
FBgn0035217	CG9169 gene product from transcript CG9169-RA(FucTD)	376.868	1284.3	-1.7688	1.4788e-22	3.2047e-20	sp|P83088|FUCTC_DROME Alpha-(1,3)-fucosyltransferase C OS=Drosophila melanogaster OX=7227 GN=FucTC PE=2 SV=4//7.53249e-23
FBgn0267692	ncRNA(CR46028)	19.1607	65.3716	-1.7705	0.00022686	0.0015429	-//-
FBgn0030525	CG10996 gene product from transcript CG10996-RA(CG10996)	148.383	508.213	-1.7761	1.7117e-20	1.9197e-18	sp|Q5EA79|GALM_BOVIN Aldose 1-epimerase OS=Bos taurus OX=9913 GN=GALM PE=2 SV=1//2.90561e-68
FBgn0034566	CG9313 gene product from transcript CG9313-RC(CG9313)	936.304	3208.74	-1.777	1.2751e-27	1.4606e-24	sp|Q16959|DYI2_HELCR Dynein intermediate chain 2, ciliary OS=Heliocidaris crassispina OX=1043166 PE=2 SV=1//2.24028e-12
FBgn0032431	CG5435 gene product from transcript CG5435-RB(CG5435)	346.613	1188.7	-1.778	3.032e-23	8.7317e-21	sp|Q9VK89|TRM1_DROME Probable tRNA (guanine(26)-N(2))-dimethyltransferase OS=Drosophila melanogaster OX=7227 GN=CG6388 PE=2 SV=1//5.14786e-09
FBgn0265897	ncRNA(CR44686)	23.8744	81.9102	-1.7786	1.6903e-08	2.6813e-07	-//-
FBgn0259151	CG42266 gene product from transcript CG42266-RA(CG42266)	297.454	1021.94	-1.7806	2.5561e-22	4.9991e-20	sp|P83474|Y818_DROME Uncharacterized protein CG42266 OS=Drosophila melanogaster OX=7227 GN=CG42266 PE=2 SV=3//3.22681e-104
FBgn0039435	TweedleP(TwdlP)	18.9699	65.1936	-1.781	8.5329e-06	8.2484e-05	-//-
FBgn0264474	ncRNA(CR43882)	11.6693	40.1101	-1.7812	2.4378e-05	0.00021039	-//-
FBgn0033090	CG15909 gene product from transcript CG15909-RA(CG15909)	28.6978	98.8042	-1.7836	1.814e-07	2.3924e-06	-//-
FBgn0267077	ncRNA(CR45521)	7.00793	24.1434	-1.7846	0.00080591	0.0046591	-//-
FBgn0032039	CG13385 gene product from transcript CG13385-RA(CG13385)	165.682	570.921	-1.7849	1.9965e-21	2.7842e-19	-//-
FBgn0263988	Dynein intermediate chain at 61B(Dic61B)	128.589	443.32	-1.7856	6.1251e-14	2.1684e-12	sp|E9PYY5|WDR78_MOUSE WD repeat-containing protein 78 OS=Mus musculus OX=10090 GN=Wdr78 PE=1 SV=1//2.60071e-45
FBgn0031574	CG3964 gene product from transcript CG3964-RB(CG3964)	1966.37	6780.18	-1.7858	5.0632e-20	5.0749e-18	sp|Q80UG8|TTLL4_MOUSE Tubulin polyglutamylase TTLL4 OS=Mus musculus OX=10090 GN=Ttll4 PE=2 SV=3//8.75411e-140
FBgn0030691	EFHC1 homologue 1(Efhc1.1)	241.549	834.872	-1.7892	6.6933e-20	6.5853e-18	sp|Q32TF8|EFHC2_DANRE EF-hand domain-containing family member C2 OS=Danio rerio OX=7955 GN=efhc2 PE=2 SV=2//6.90284e-139
FBgn0031201	CG12446 gene product from transcript CG12446-RA(CG12446)	76.07	263.458	-1.7922	2.8933e-16	1.492e-14	-//-
FBgn0037994	CG4810 gene product from transcript CG4810-RA(CG4810)	317.501	1101.03	-1.794	7.2149e-25	3.9899e-22	sp|Q9VGC7|EI3D2_DROME Eukaryotic translation initiation factor 3 subunit D-2 OS=Drosophila melanogaster OX=7227 GN=eIF3d2 PE=2 SV=1//0
FBgn0038697	CG3581 gene product from transcript CG3581-RA(CG3581)	449.386	1565.67	-1.8008	3.5071e-20	3.7003e-18	-//-
FBgn0265578	CG44405 gene product from transcript CG44405-RA(CG44405)	47.8626	166.812	-1.8013	3.5712e-07	4.4466e-06	-//-
FBgn0283437	Prophenoloxidase 1(PPO1)	163.814	571.373	-1.8024	4.6042e-08	6.7247e-07	sp|Q9V521|PPO2_DROME Phenoloxidase 2 OS=Drosophila melanogaster OX=7227 GN=PPO2 PE=1 SV=1//0
FBgn0052686	CG32686 gene product from transcript CG32686-RA(CG32686)	336.392	1173.99	-1.8032	7.0414e-22	1.2013e-19	-//-
FBgn0034477	CG13872 gene product from transcript CG13872-RA(CG13872)	277.089	967.219	-1.8035	6.136e-17	3.6178e-15	-//-
FBgn0036687	CG6652 gene product from transcript CG6652-RA(CG6652)	918.668	3207.16	-1.8037	7.2061e-19	5.8662e-17	sp|Q80ST9|LCA5_MOUSE Lebercilin OS=Mus musculus OX=10090 GN=Lca5 PE=1 SV=1//2.69182e-10
FBgn0034745	CG4329 gene product from transcript CG4329-RA(CG4329)	370.143	1292.55	-1.8041	2.6165e-22	5.0556e-20	sp|Q96MR6|CFA57_HUMAN Cilia- and flagella-associated protein 57 OS=Homo sapiens OX=9606 GN=CFAP57 PE=2 SV=3//4.67816e-129
FBgn0037455	CG2336 gene product from transcript CG2336-RA(CG2336)	284.443	994.381	-1.8057	1.0128e-24	4.9517e-22	-//-
FBgn0051533	CG31533 gene product from transcript CG31533-RA(CG31533)	406.5	1422.21	-1.8068	8.6918e-12	2.2739e-10	-//-
FBgn0270925	CG4836 gene product from transcript CG4836-RC(CG4836)	18129.2	63447.6	-1.8072	1.0146e-21	1.5953e-19	sp|Q9FJ95|DHSO_ARATH Sorbitol dehydrogenase OS=Arabidopsis thaliana OX=3702 GN=SDH PE=1 SV=1//5.5837e-39
FBgn0031301	CG14339 gene product from transcript CG14339-RA(CG14339)	76.6401	268.578	-1.8092	9.3586e-12	2.4246e-10	-//-
FBgn0032677	CG5790 gene product from transcript CG5790-RB(CG5790)	965.843	3388.54	-1.8108	6.3943e-23	1.6023e-20	sp|O00311|CDC7_HUMAN Cell division cycle 7-related protein kinase OS=Homo sapiens OX=9606 GN=CDC7 PE=1 SV=1//1.79728e-80
FBgn0043865	Stromalin-2(SA-2)	16.2551	57.0404	-1.8111	3.6633e-06	3.8198e-05	sp|O35638|STAG2_MOUSE Cohesin subunit SA-2 OS=Mus musculus OX=10090 GN=Stag2 PE=1 SV=3//3.58719e-57
FBgn0023550	CG18031 gene product from transcript CG18031-RA(CG18031)	119.676	420.174	-1.8119	5.3016e-20	5.2809e-18	sp|Q8MS59|WAT_DROME Fatty acyl-CoA reductase wat OS=Drosophila melanogaster OX=7227 GN=wat PE=1 SV=1//7.77368e-63
FBgn0029951	CG11369 gene product from transcript CG11369-RA(CG11369)	205.626	722.137	-1.8122	8.8534e-20	8.4513e-18	-//-
FBgn0036925	schumacher-levy(schuy)	405.178	1427.6	-1.817	1.2758e-21	1.9303e-19	-//-
FBgn0039395	CG14546 gene product from transcript CG14546-RA(CG14546)	257.571	911.019	-1.8225	1.016e-24	4.9517e-22	-//-
FBgn0085356	CG34327 gene product from transcript CG34327-RA(CG34327)	22.0803	78.1207	-1.8229	6.8781e-07	8.1767e-06	-//-
FBgn0002865	Male-specific RNA 98Ca(Mst98Ca)	2370.99	8392.12	-1.8235	1.2312e-20	1.4626e-18	-//-
FBgn0062411	Copper transporter 1C(Ctr1C)	33.5104	118.89	-1.8269	3.6309e-11	8.5884e-10	sp|Q5RAS6|COPT1_PONAB High affinity copper uptake protein 1 OS=Pongo abelii OX=9601 GN=SLC31A1 PE=2 SV=1//1.96569e-13
FBgn0265681	ncRNA(CR44488)	8.96563	31.8085	-1.8269	0.00011099	0.00082215	-//-
FBgn0031621	Early boundary activity 3(Elba3)	11.5718	41.0602	-1.8271	1.5007e-05	0.00013667	sp|Q9VR19|ELBA3_DROME Early boundary activity protein 3 OS=Drosophila melanogaster OX=7227 GN=Elba3 PE=1 SV=1//0
FBgn0050384	CG30384 gene product from transcript CG30384-RA(CG30384)	191.853	680.971	-1.8276	4.7566e-22	8.6684e-20	-//-
FBgn0033818	CG4712 gene product from transcript CG4712-RA(CG4712)	563.72	2002.34	-1.8286	1.6306e-21	2.3773e-19	-//-
FBgn0039812	CG15548 gene product from transcript CG15548-RA(CG15548)	119.561	425.258	-1.8306	1.5832e-14	6.1777e-13	-//-
FBgn0034127	CG7848 gene product from transcript CG7848-RA(CG7848)	260.253	927.02	-1.8327	2.4673e-19	2.1622e-17	sp|P48163|MAOX_HUMAN NADP-dependent malic enzyme OS=Homo sapiens OX=9606 GN=ME1 PE=1 SV=1//3.13677e-109
FBgn0039201	CG13617 gene product from transcript CG13617-RA(CG13617)	14.8867	53.0481	-1.8333	1.1128e-06	1.2756e-05	sp|Q32PN7|DZI1L_DANRE Zinc finger protein DZIP1L OS=Danio rerio OX=7955 GN=dzip1l PE=2 SV=1//6.92411e-10
FBgn0013813	Dynein heavy chain at 89D(Dhc98D)	263.775	941.481	-1.8356	2.2406e-09	4.1444e-08	sp|Q8IVF4|DYH10_HUMAN Dynein heavy chain 10, axonemal OS=Homo sapiens OX=9606 GN=DNAH10 PE=1 SV=4//1.27936e-33
FBgn0051068	CG31068 gene product from transcript CG31068-RC(CG31068)	133.018	474.871	-1.8359	3.5293e-21	4.5644e-19	-//-
FBgn0030684	CG8260 gene product from transcript CG8260-RA(CG8260)	22.7973	81.5195	-1.8383	7.9497e-09	1.3505e-07	-//-
FBgn0036125	CG6279 gene product from transcript CG6279-RA(CG6279)	940.963	3365.15	-1.8385	4.5934e-20	4.6623e-18	sp|Q5BK17|IYD1_RAT Iodotyrosine deiodinase 1 OS=Rattus norvegicus OX=10116 GN=Iyd PE=2 SV=1//4.65558e-77
FBgn0020280	labial associated factor(laf)	100.995	361.231	-1.8386	2.3928e-19	2.12e-17	-//-
FBgn0036482	CG13457 gene product from transcript CG13457-RA(CG13457)	207.458	742.09	-1.8388	2.4646e-15	1.0859e-13	-//-
FBgn0036996	magro(mag)	371.61	1333	-1.8428	2.1162e-05	0.00018505	sp|O46108|LIP3_DROME Lipase 3 OS=Drosophila melanogaster OX=7227 GN=Lip3 PE=2 SV=1//9.59586e-101
FBgn0040508	CG5983 gene product from transcript CG5983-RB(ACXC)	336.649	1211.63	-1.8476	1.1083e-22	2.5392e-20	sp|P97490|ADCY8_MOUSE Adenylate cyclase type 8 OS=Mus musculus OX=10090 GN=Adcy8 PE=1 SV=2//1.31951e-08
FBgn0083946	lost boys(lobo)	163.97	591.352	-1.8506	1.4044e-16	7.6089e-15	sp|Q4V516|DRC7_DROME Coiled-coil domain-containing protein lobo OS=Drosophila melanogaster OX=7227 GN=lobo PE=1 SV=1//0
FBgn0033955	CG12866 gene product from transcript CG12866-RE(CG12866)	83.6481	301.777	-1.8511	2.3896e-17	1.4911e-15	sp|O95907|MOT3_HUMAN Monocarboxylate transporter 3 OS=Homo sapiens OX=9606 GN=SLC16A8 PE=2 SV=1//7.91876e-15
FBgn0038208	CG14355 gene product from transcript CG14355-RA(CG14355)	2003.68	7233.72	-1.8521	4.0008e-23	1.1256e-20	-//-
FBgn0052064	Sperm-Leucylaminopeptidase 4(S-Lap4)	8804.72	31813.1	-1.8533	5.7538e-23	1.4883e-20	sp|P00727|AMPL_BOVIN Cytosol aminopeptidase OS=Bos taurus OX=9913 GN=LAP3 PE=1 SV=3//4.5583e-128
FBgn0032563	CG15258 gene product from transcript CG15258-RA(CG15258)	143.911	520.55	-1.8549	2.9618e-21	3.9581e-19	-//-
FBgn0039491	CG6059 gene product from transcript CG6059-RA(CG6059)	519.064	1877.99	-1.8552	7.2972e-28	9.0019e-25	sp|B2RW38|CFA58_MOUSE Cilia- and flagella-associated protein 58 OS=Mus musculus OX=10090 GN=Cfap58 PE=2 SV=1//9.53854e-31
FBgn0029501	Caldesmon-related protein(Crtp)	445.407	1611.8	-1.8555	6.5381e-14	2.2975e-12	-//-
FBgn0267366	milkah(mil)	667.425	2415.65	-1.8557	1.2422e-20	1.4648e-18	sp|Q28EB4|NP1L1_XENTR Nucleosome assembly protein 1-like 1 OS=Xenopus tropicalis OX=8364 GN=nap1l1 PE=2 SV=1//1.77659e-29
FBgn0263388	ncRNA(CR43440)	6.31824	22.8999	-1.8577	0.00081035	0.004678	-//-
FBgn0037059	CG10510 gene product from transcript CG10510-RA(CG10510)	247.814	900.787	-1.8619	3.1764e-18	2.2946e-16	sp|Q2TA16|DRC2_BOVIN Dynein regulatory complex subunit 2 OS=Bos taurus OX=9913 GN=CCDC65 PE=2 SV=1//1.87325e-06
FBgn0036311	CG17666 gene product from transcript CG17666-RA(CG17666)	590.492	2147.46	-1.8626	5.1035e-29	7.4405e-26	-//-
FBgn0263006	Sarco/endoplasmic reticulum Ca(2+)-ATPase(SERCA)	7242.45	26345	-1.863	2.9915e-32	6.8536e-29	sp|P22700|ATC1_DROME Calcium-transporting ATPase sarcoplasmic/endoplasmic reticulum type OS=Drosophila melanogaster OX=7227 GN=Ca-P60A PE=1 SV=2//0
FBgn0031930	CG7025 gene product from transcript CG7025-RA(CG7025)	47.9068	174.646	-1.8661	6.5809e-12	1.756e-10	sp|O02350|CBPA1_ANOGA Zinc carboxypeptidase A 1 OS=Anopheles gambiae OX=7165 GN=AGAP009593 PE=2 SV=3//1.01115e-100
FBgn0037915	CG6790 gene product from transcript CG6790-RA(CG6790)	464.997	1696.6	-1.8674	3.2519e-16	1.6556e-14	sp|Q9R1S3|PIGN_MOUSE GPI ethanolamine phosphate transferase 1 OS=Mus musculus OX=10090 GN=Pign PE=2 SV=2//6.16552e-38
FBgn0050385	CG30385 gene product from transcript CG30385-RA(CG30385)	36.7196	134.065	-1.8683	3.0927e-12	8.6255e-11	-//-
FBgn0034844	CG9861 gene product from transcript CG9861-RA(CG9861)	1169.78	4276.67	-1.8702	8.4228e-23	1.9576e-20	-//-
FBgn0037483	CG14609 gene product from transcript CG14609-RB(CG14609)	335.833	1229.83	-1.8726	9.6717e-20	9.1778e-18	-//-
FBgn0263048	CG43343 gene product from transcript CG43343-RB(CG43343)	1782.13	6531.76	-1.8739	3.8879e-20	4.0585e-18	sp|Q27928|GPDA_DROPS Glycerol-3-phosphate dehydrogenase [NAD(+)], cytoplasmic OS=Drosophila pseudoobscura pseudoobscura OX=46245 GN=Gpdh PE=3 SV=2//5.69427e-90
FBgn0029747	CG5062 gene product from transcript CG5062-RA(CG5062)	110.879	406.43	-1.874	3.4583e-10	7.1286e-09	-//-
FBgn0051559	CG31559 gene product from transcript CG31559-RA(CG31559)	9.61128	35.2402	-1.8744	3.8877e-05	0.0003194	sp|Q9VNL4|GRCR1_DROME Glutaredoxin domain-containing cysteine-rich protein CG31559 OS=Drosophila melanogaster OX=7227 GN=CG31559 PE=2 SV=2//0
FBgn0039387	multicopper oxidase 3(MCO3)	5.29472	19.4978	-1.8807	0.0026241	0.012976	sp|P06811|LAC1_NEUCR Laccase OS=Neurospora crassa (strain ATCC 24698 / 74-OR23-1A / CBS 708.71 / DSM 1257 / FGSC 987) OX=367110 GN=lacc PE=1 SV=3//3.37235e-39
FBgn0033461	CG12923 gene product from transcript CG12923-RB(CG12923)	176.471	650.009	-1.881	4.8563e-24	1.8995e-21	-//-
FBgn0035168	CG13889 gene product from transcript CG13889-RB(cep290)	221.004	814.93	-1.8826	4.2167e-18	2.9922e-16	-//-
FBgn0052703	Extracellularly regulated kinase 7(Erk7)	470.01	1734.2	-1.8835	6.4451e-17	3.7861e-15	sp|Q9W354|ERK7_DROME Extracellular signal-regulated kinase 7 OS=Drosophila melanogaster OX=7227 GN=Erk7 PE=1 SV=2//0
FBgn0265541	pseudo(CR44391)	40.796	150.617	-1.8844	2.0953e-13	6.7745e-12	-//-
FBgn0029993	CG1571 gene product from transcript CG1571-RA(CG1571)	262.44	972.614	-1.8899	3.9064e-17	2.382e-15	sp|Q16960|DYI3_HELCR Dynein intermediate chain 3, ciliary OS=Heliocidaris crassispina OX=1043166 PE=2 SV=1//5.38923e-94
FBgn0263774	CG43691 gene product from transcript CG43691-RD(CG43691)	95.8751	355.847	-1.892	1.8009e-16	9.5952e-15	-//-
FBgn0031292	CG15824 gene product from transcript CG15824-RC(CG15824)	258.25	959.234	-1.8931	3.3396e-14	1.2256e-12	sp|P15425|CYPR_DROME Peptidyl-prolyl cis-trans isomerase, rhodopsin-specific isozyme OS=Drosophila melanogaster OX=7227 GN=ninaA PE=1 SV=1//4.14256e-133
FBgn0033834	CG4744 gene product from transcript CG4744-RA(CG4744)	188.302	699.739	-1.8938	2.0021e-08	3.1295e-07	-//-
FBgn0038607	hemingway(hmw)	411.193	1528.82	-1.8945	1.9971e-14	7.6438e-13	sp|Q9VE87|HMW_DROME Protein hemingway OS=Drosophila melanogaster OX=7227 GN=hmw PE=2 SV=2//0
FBgn0037064	CG9389 gene product from transcript CG9389-RA(CG9389)	1625.11	6073.02	-1.9019	1.4377e-22	3.2022e-20	sp|O14732|IMPA2_HUMAN Inositol monophosphatase 2 OS=Homo sapiens OX=9606 GN=IMPA2 PE=1 SV=1//2.59786e-55
FBgn0051773	CG31773 gene product from transcript CG31773-RA(CG31773)	511.692	1914.25	-1.9034	1.76e-18	1.3075e-16	sp|P48760|FOLC_MOUSE Folylpolyglutamate synthase, mitochondrial OS=Mus musculus OX=10090 GN=Fpgs PE=1 SV=3//3.49636e-59
FBgn0028669	Vacuolar H[+] ATPase 100kD subunit 3(Vha100-3)	451.09	1689.43	-1.905	9.7754e-24	3.5291e-21	sp|Q8AVM5|VPP1_XENLA V-type proton ATPase 116 kDa subunit a isoform 1 OS=Xenopus laevis OX=8355 GN=atp6v0a1 PE=2 SV=1//6.6875e-163
FBgn0033720	CG13160 gene product from transcript CG13160-RB(CG13160)	3.33568	12.4941	-1.9052	0.011134	0.044012	sp|Q3UVK0|ERMP1_MOUSE Endoplasmic reticulum metallopeptidase 1 OS=Mus musculus OX=10090 GN=Ermp1 PE=1 SV=2//5.31798e-99
FBgn0267449	WD40 Y(WDY)	6.23713	23.3752	-1.906	0.007306	0.030817	sp|B4F7L9|WDY_DROME WD repeat-containing protein on Y chromosome OS=Drosophila melanogaster OX=7227 GN=WDY PE=2 SV=2//0
FBgn0038296	CG6752 gene product from transcript CG6752-RA(CG6752)	525.218	1968.64	-1.9062	8.4481e-19	6.7404e-17	sp|D3ZXK7|RN123_RAT E3 ubiquitin-protein ligase RNF123 OS=Rattus norvegicus OX=10116 GN=Rnf123 PE=1 SV=1//2.12403e-175
FBgn0028987	Serpin 28F(Spn28F)	647.129	2426.45	-1.9067	6.7254e-14	2.3498e-12	sp|Q7YTY6|SP42D_DROME Serine protease inhibitor 42Dd OS=Drosophila melanogaster OX=7227 GN=Spn42Dd PE=2 SV=1//1.58785e-107
FBgn0032481	CG16972 gene product from transcript CG16972-RA(CG16972)	1727.34	6477.46	-1.9069	4.5998e-14	1.654e-12	-//-
FBgn0051921	CG31921 gene product from transcript CG31921-RA(CG31921)	573.271	2150.54	-1.9074	6.7391e-26	4.9125e-23	-//-
FBgn0037035	CG10589 gene product from transcript CG10589-RA(CG10589)	339.498	1274.66	-1.9086	6.6648e-19	5.4532e-17	-//-
FBgn0036895	male sterile (3) 76Cc(ms(3)76Cc)	654.533	2468.57	-1.9151	1.3287e-17	8.5922e-16	-//-
FBgn0036310	CG10969 gene product from transcript CG10969-RA(CG10969)	174.563	658.5	-1.9154	3.5093e-12	9.7032e-11	-//-
FBgn0033794	CG13326 gene product from transcript CG13326-RA(CG13326)	375.288	1416.52	-1.9163	1.1993e-20	1.4353e-18	sp|Q5W041|ARMC3_HUMAN Armadillo repeat-containing protein 3 OS=Homo sapiens OX=9606 GN=ARMC3 PE=2 SV=2//8.21223e-09
FBgn0030697	CG8565 gene product from transcript CG8565-RA(CG8565)	689.599	2609.9	-1.9202	2.3689e-20	2.5844e-18	sp|Q5RD27|SRPK1_PONAB SRSF protein kinase 1 OS=Pongo abelii OX=9601 GN=SRPK1 PE=2 SV=2//1.92817e-45
FBgn0061197	CG13164 gene product from transcript CG13164-RE(CG13164)	2923.36	11092.6	-1.9239	2.6675e-19	2.3124e-17	-//-
FBgn0051551	CG31551 gene product from transcript CG31551-RA(CG31551)	5.63957	21.5403	-1.9334	0.00088415	0.005048	-//-
FBgn0015586	Accessory gland protein 76A(Acp76A)	663.48	2542.41	-1.9381	9.6856e-15	3.9027e-13	sp|Q9VVW1|A76A_DROME Accessory gland protein Acp76A OS=Drosophila melanogaster OX=7227 GN=Acp76A PE=2 SV=2//0
FBgn0035429	CG12017 gene product from transcript CG12017-RB(CG12017)	36.7663	141.029	-1.9395	2.6335e-13	8.3964e-12	-//-
FBgn0033367	Prophenoloxidase 2(PPO2)	120.316	462.355	-1.9422	3.6701e-14	1.3407e-12	sp|Q9V521|PPO2_DROME Phenoloxidase 2 OS=Drosophila melanogaster OX=7227 GN=PPO2 PE=1 SV=1//0
FBgn0266432	CG45062 gene product from transcript CG45062-RB(CG45062)	37.1071	142.74	-1.9436	1.6026e-13	5.2451e-12	sp|P13607|ATNA_DROME Sodium/potassium-transporting ATPase subunit alpha OS=Drosophila melanogaster OX=7227 GN=Atpalpha PE=1 SV=3//3.32343e-110
FBgn0035724	CG10064 gene product from transcript CG10064-RA(CG10064)	503.024	1943.58	-1.95	2.0528e-21	2.8379e-19	sp|Q5F201|CFA52_MOUSE Cilia- and flagella-associated protein 52 OS=Mus musculus OX=10090 GN=Cfap52 PE=1 SV=1//2.95399e-128
FBgn0032276	CG17098 gene product from transcript CG17098-RA(CG17098)	725.203	2802.72	-1.9504	1.3001e-16	7.1202e-15	sp|Q8AVN9|ZN346_XENLA Zinc finger protein 346 OS=Xenopus laevis OX=8355 GN=znf346 PE=1 SV=1//2.25464e-07
FBgn0032471	CG5122 gene product from transcript CG5122-RA(CG5122)	389.555	1511.79	-1.9564	1.0591e-19	9.9198e-18	sp|P43155|CACP_HUMAN Carnitine O-acetyltransferase OS=Homo sapiens OX=9606 GN=CRAT PE=1 SV=5//6.26576e-126
FBgn0030979	CG14190 gene product from transcript CG14190-RA(CG14190)	31.3974	122.085	-1.9592	4.6431e-07	5.6711e-06	-//-
FBgn0030376	CG2750 gene product from transcript CG2750-RB(CG2750)	422.907	1651.88	-1.9657	1.35e-21	2.0047e-19	-//-
FBgn0030952	CG12609 gene product from transcript CG12609-RB(CG12609)	97.0633	379.392	-1.9667	7.0233e-16	3.3323e-14	-//-
FBgn0052437	CG32437 gene product from transcript CG32437-RA(CG32437)	345.11	1357.69	-1.976	2.7717e-24	1.1697e-21	-//-
FBgn0261529	male sterile (2) 34Fe(ms(2)34Fe)	280.282	1106.7	-1.9813	4.9623e-19	4.1233e-17	-//-
FBgn0052255	Gustatory receptor 64f(Gr64f)	4.31246	17.0665	-1.9846	0.002555	0.012705	sp|P83297|GR64F_DROME Gustatory receptor for sugar taste 64f OS=Drosophila melanogaster OX=7227 GN=Gr64f PE=2 SV=2//0
FBgn0002939	neither inactivation nor afterpotential D(ninaD)	388.903	1540.27	-1.9857	2.6149e-11	6.3252e-10	sp|Q27367|CRQ_DROME Protein croquemort OS=Drosophila melanogaster OX=7227 GN=crq PE=1 SV=3//1.9571e-123
FBgn0267772	ncRNA(CR46103)	5.30296	21.1401	-1.9951	0.00066541	0.003964	-//-
FBgn0038694	CG5217 gene product from transcript CG5217-RA(CG5217)	340.711	1360.98	-1.998	4.5498e-24	1.8701e-21	-//-
FBgn0031785	CG13991 gene product from transcript CG13991-RA(CG13991)	644.973	2583.72	-2.0021	8.5984e-17	4.9247e-15	-//-
FBgn0036995	artichoke(atk)	66.1112	265.457	-2.0055	4.686e-13	1.4507e-11	sp|Q9VPF0|ATK_DROME Protein artichoke OS=Drosophila melanogaster OX=7227 GN=atk PE=1 SV=2//0
FBgn0085460	CG34431 gene product from transcript CG34431-RA(CG34431)	19.7693	79.6744	-2.0109	8.569e-10	1.6677e-08	-//-
FBgn0029703	CG12692 gene product from transcript CG12692-RC(CG12692)	243.663	986.971	-2.0181	7.7391e-27	6.8951e-24	-//-
FBgn0037276	CG17387 gene product from transcript CG17387-RA(CG17387)	271.563	1100.98	-2.0194	1.379e-16	7.4968e-15	sp|Q0V9R4|CCD39_XENTR Coiled-coil domain-containing protein 39 OS=Xenopus tropicalis OX=8364 GN=ccdc39 PE=2 SV=1//6.74479e-35
FBgn0265414	ncRNA(CR44326)	7.00105	28.3848	-2.0195	8.2978e-05	0.00063247	-//-
FBgn0025387	CG12184 gene product from transcript CG12184-RA(CG12184)	61.3879	249.594	-2.0236	3.8388e-08	5.7109e-07	-//-
FBgn0038967	CG13847 gene product from transcript CG13847-RC(CG13847)	4.30832	17.5936	-2.0299	0.0017268	0.0090508	-//-
FBgn0035799	CG14838 gene product from transcript CG14838-RA(CG14838)	101.132	414.192	-2.0341	7.9402e-12	2.0944e-10	sp|Q95JP0|WDR63_MACFA WD repeat-containing protein 63 OS=Macaca fascicularis OX=9541 GN=WDR63 PE=2 SV=1//7.31402e-43
FBgn0004780	CG2341 gene product from transcript CG2341-RA(Ccp84Ad)	11.3011	46.2895	-2.0342	0.00029534	0.0019523	sp|P80682|CUA2B_TENMO Larval cuticle protein A2B OS=Tenebrio molitor OX=7067 PE=1 SV=1//3.5164e-33
FBgn0039198	CG5768 gene product from transcript CG5768-RD(CG5768)	3.68462	15.1006	-2.035	0.003189	0.015372	-//-
FBgn0038819	Cuticular protein 92F(Cpr92F)	10.9205	44.8337	-2.0375	9.271e-07	1.0782e-05	-//-
FBgn0266260	ncRNA(CR44955)	26.7621	110.091	-2.0404	1.0539e-11	2.7129e-10	-//-
FBgn0051231	CG31231 gene product from transcript CG31231-RA(CG31231)	409.761	1687.06	-2.0417	5.5418e-24	2.0668e-21	-//-
FBgn0283476	Dynein heavy chain at 16F(Dhc16F)	138.691	572.441	-2.0452	5.8859e-10	1.174e-08	sp|Q9C0G6|DYH6_HUMAN Dynein heavy chain 6, axonemal OS=Homo sapiens OX=9606 GN=DNAH6 PE=2 SV=3//0
FBgn0038248	CG7886 gene product from transcript CG7886-RA(CG7886)	1251.53	5229.35	-2.0629	5.7229e-16	2.7478e-14	sp|Q9VFH6|CEP78_DROME Protein Cep78 homolog OS=Drosophila melanogaster OX=7227 GN=CG7886 PE=2 SV=2//0
FBgn0035817	CG7409 gene product from transcript CG7409-RA(CG7409)	1359.04	5692.49	-2.0665	7.2427e-11	1.6382e-09	sp|P02516|HSP23_DROME Heat shock protein 23 OS=Drosophila melanogaster OX=7227 GN=Hsp23 PE=2 SV=2//6.32686e-25
FBgn0041183	Thioester-containing protein 1(Tep1)	6.95292	29.1255	-2.0666	4.8192e-05	0.00038798	sp|Q6YHK3|CD109_HUMAN CD109 antigen OS=Homo sapiens OX=9606 GN=CD109 PE=1 SV=2//1.83332e-147
FBgn0031249	CG11911 gene product from transcript CG11911-RA(CG11911)	680.751	2859.43	-2.0705	3.2046e-20	3.4262e-18	sp|Q4TTV7|GPL_GLOAU Lectizyme OS=Glossina austeni OX=7395 GN=Gpl PE=2 SV=1//6.44989e-56
FBgn0030098	CG12057 gene product from transcript CG12057-RA(CG12057)	1428.45	6030.15	-2.0777	1.0372e-37	4.1583e-34	-//-
FBgn0052436	CG32436 gene product from transcript CG32436-RA(CG32436)	2655.18	11219.1	-2.0791	3.1699e-19	2.7185e-17	-//-
FBgn0040038	CG12423 gene product from transcript CG12423-RB(klhl10)	149.589	634.819	-2.0853	4.907e-23	1.3116e-20	sp|Q6JEL3|KLH10_RAT Kelch-like protein 10 OS=Rattus norvegicus OX=10116 GN=Klhl10 PE=1 SV=1//8.35661e-178
FBgn0035430	CG12009 gene product from transcript CG12009-RB(CG12009)	4.64354	19.7295	-2.0871	0.00064369	0.0038475	-//-
FBgn0029697	CG15570 gene product from transcript CG15570-RA(CG15570)	3.33154	14.1861	-2.0902	0.0038477	0.018011	-//-
FBgn0053017	CG33017 gene product from transcript CG33017-RD(CG33017)	324.384	1389.65	-2.099	8.8329e-12	2.2977e-10	-//-
FBgn0013810	Dynein heavy chain at 36C(Dhc36C)	232.829	1013.3	-2.1217	9.9027e-24	3.5291e-21	sp|Q8WXX0|DYH7_HUMAN Dynein heavy chain 7, axonemal OS=Homo sapiens OX=9606 GN=DNAH7 PE=1 SV=2//0
FBgn0040696	CG18675 gene product from transcript CG18675-RA(CG18675)	55.8322	243.21	-2.123	4.0556e-20	4.1756e-18	sp|Q9VZH1|CF298_DROME Cilia- and flagella-associated protein 298 OS=Drosophila melanogaster OX=7227 GN=CG18675 PE=2 SV=2//0
FBgn0032442	CG15485 gene product from transcript CG15485-RA(CG15485)	7.26065	31.9736	-2.1387	1.5298e-05	0.00013891	sp|Q9JMI0|ECEL1_MOUSE Endothelin-converting enzyme-like 1 OS=Mus musculus OX=10090 GN=Ecel1 PE=2 SV=2//2.70468e-71
FBgn0010052	Juvenile hormone esterase(Jhe)	15.4351	68.3553	-2.1468	1.0023e-09	1.9343e-08	sp|B2D0J5|EST6_APIME Venom carboxylesterase-6 OS=Apis mellifera OX=7460 PE=2 SV=1//4.12396e-69
FBgn0083960	CG34124 gene product from transcript CG34124-RA(CG34124)	128.06	578.112	-2.1745	7.8195e-23	1.8441e-20	sp|Q96MT7|CFA44_HUMAN Cilia- and flagella-associated protein 44 OS=Homo sapiens OX=9606 GN=CFAP44 PE=1 SV=1//1.96816e-122
FBgn0265674	ncRNA(CR44481)	16.2373	73.5167	-2.1788	2.517e-10	5.2834e-09	-//-
FBgn0264870	ncRNA(CR44061)	5.96516	27.0776	-2.1825	4.2528e-05	0.00034638	-//-
FBgn0037416	Osiris 9(Osi9)	2.97158	13.5227	-2.1861	0.0037638	0.01769	-//-
FBgn0035581	CG17150 gene product from transcript CG17150-RD(CG17150)	374.782	1706.07	-2.1866	2.9832e-14	1.1023e-12	sp|Q8TD57|DYH3_HUMAN Dynein heavy chain 3, axonemal OS=Homo sapiens OX=9606 GN=DNAH3 PE=2 SV=1//1.66041e-10
FBgn0030509	CG11162 gene product from transcript CG11162-RA(CG11162)	19.2858	89.2953	-2.211	5.2443e-12	1.4159e-10	sp|Q9GKT2|FXDC2_MACFA Fatty acid hydroxylase domain-containing protein 2 OS=Macaca fascicularis OX=9541 GN=FAXDC2 PE=2 SV=1//7.64514e-64
FBgn0264394	ncRNA(CR43842)	3.66951	17.4217	-2.2472	0.00070168	0.0041462	-//-
FBgn0037204	CG11131 gene product from transcript CG11131-RB(CG11131)	8.30617	43.2672	-2.381	7.5459e-08	1.0653e-06	-//-
FBgn0038850	CG17279 gene product from transcript CG17279-RC(CG17279)	7.70037	40.2941	-2.3876	1.409e-07	1.8861e-06	sp|O76879|CCCP_DROME Circadian clock-controlled protein OS=Drosophila melanogaster OX=7227 GN=anon-3B1.2 PE=2 SV=2//4.54434e-22
FBgn0265899	ncRNA(CR44688)	2.64873	14.6359	-2.4661	0.0010987	0.0061182	-//-
FBgn0034022	CG12964 gene product from transcript CG12964-RB(CG12964)	2.00718	11.215	-2.4822	0.0039935	0.018585	-//-
FBgn0266318	ncRNA(CR44983)	2.99632	17.2679	-2.5268	0.00029176	0.0019338	-//-
FBgn0031001	CG7884 gene product from transcript CG7884-RA(CG7884)	2.3204	13.4011	-2.5299	0.0019219	0.0099264	-//-
FBgn0267657	ncRNA(CR45995)	2.64873	15.7854	-2.5752	0.00256	0.012722	-//-
FBgn0031900	CG13786 gene product from transcript CG13786-RB(CG13786)	1.65684	10.1642	-2.617	0.0047259	0.021355	-//-
FBgn0031942	CG7203 gene product from transcript CG7203-RC(CG7203)	31.2849	196.831	-2.6534	1.3794e-06	1.5556e-05	-//-
FBgn0020908	Sarcoplasmic calcium-binding protein 1(Scp1)	7734.05	49650.2	-2.6825	5.6624e-10	1.1337e-08	sp|P05946|SCP1_ASTLP Sarcoplasmic calcium-binding protein 1 OS=Astacus leptodactylus OX=6717 PE=1 SV=1//1.09836e-67
FBgn0042201	Neuropeptide-like precursor 3(Nplp3)	181.46	1222.95	-2.7526	3.7092e-26	2.9743e-23	sp|Q9VV28|NPLP3_DROME Neuropeptide-like 3 OS=Drosophila melanogaster OX=7227 GN=Nplp3 PE=1 SV=1//8.35802e-25
FBgn0004777	CG2342 gene product from transcript CG2342-RA(Ccp84Ag)	4.67377	33.9142	-2.8592	4.3203e-08	6.3622e-07	sp|P80682|CUA2B_TENMO Larval cuticle protein A2B OS=Tenebrio molitor OX=7067 PE=1 SV=1//2.10382e-25
FBgn0019928	CG4812 gene product from transcript CG4812-RA(Ser8)	56.0466	407.263	-2.8613	1.0113e-39	5.4062e-36	sp|C0HKA4|Y0031_DROME Trypsin delta/gamma-like protein CG30031 OS=Drosophila melanogaster OX=7227 GN=CG30031 PE=3 SV=1//1.82691e-79
FBgn0035022	CG11413 gene product from transcript CG11413-RA(CG11413)	9.27057	69.5578	-2.9075	0.00018251	0.0012848	-//-
FBgn0040074	CG13057 gene product from transcript CG13057-RA(retinin)	93.0492	858.657	-3.206	1.4822e-27	1.5847e-24	sp|Q9VV36|RETIN_DROME Retinin OS=Drosophila melanogaster OX=7227 GN=retinin PE=1 SV=2//2.35262e-96
FBgn0264831	ncRNA(CR44039)	1.00152	9.80096	-3.2907	0.001461	0.0078469	-//-
FBgn0051741	CG31741 gene product from transcript CG31741-RA(CG31741)	1.0084	10.6295	-3.3979	0.00078138	0.0045485	sp|Q27367|CRQ_DROME Protein croquemort OS=Drosophila melanogaster OX=7227 GN=crq PE=1 SV=3//8.72853e-116
FBgn0083936	Accessory gland protein 54A1(Acp54A1)	540.617	5721.6	-3.4037	1.091e-30	1.7497e-27	-//-
FBgn0033597	Cuticular protein 47Ea(Cpr47Ea)	0.663556	7.68723	-3.5342	0.0044821	0.020433	sp|Q7M4F3|CUD2_SCHGR Endocuticle structural glycoprotein SgAbd-2 OS=Schistocerca gregaria OX=7010 PE=1 SV=1//4.03948e-23
FBgn0032069	Lysosomal alpha-mannosidase VI(LManVI)	89.8768	1042.63	-3.5361	4.1314e-31	7.3617e-28	sp|Q60HE9|MA2B1_MACFA Lysosomal alpha-mannosidase OS=Macaca fascicularis OX=9541 GN=MAN2B1 PE=2 SV=1//0
FBgn0032068	Lysosomal alpha-mannosidase V(LManV)	47.1374	559.506	-3.5692	1.7192e-36	5.5142e-33	sp|Q29451|MA2B1_BOVIN Lysosomal alpha-mannosidase OS=Bos taurus OX=9913 GN=MAN2B1 PE=1 SV=4//0
FBgn0035550	CG11349 gene product from transcript CG11349-RB(CG11349)	1.33399	17.0322	-3.6744	7.9327e-06	7.6977e-05	-//-
FBgn0050114	CG30114 gene product from transcript CG30114-RA(CG30114)	0.673183	8.66486	-3.6861	0.0071568	0.030315	-//-
FBgn0020906	Jonah 25Bi(Jon25Bi)	8.58088	124.805	-3.8624	0.0004424	0.0027844	sp|C0HKF8|SER2_DROME Serine protease 2 OS=Drosophila melanogaster OX=7227 GN=Jon99Ciii PE=2 SV=1//1.69455e-91
FBgn0031654	Jonah 25Bii(Jon25Bii)	2.93996	47.1705	-4.004	0.001388	0.007497	sp|C0HKF8|SER2_DROME Serine protease 2 OS=Drosophila melanogaster OX=7227 GN=Jon99Ciii PE=2 SV=1//4.09578e-94
FBgn0086673	CG13272 gene product from transcript CG13272-RB(CG13272)	1.0084	18.7438	-4.2163	4.5539e-07	5.5834e-06	-//-
FBgn0028544	CG16884 gene product from transcript CG16884-RA(CG16884)	0.335219	7.3307	-4.4508	0.0021372	0.010915	-//-
FBgn0261853	CG42782 gene product from transcript CG42782-RB(CG42782)	81.1702	1821.93	-4.4884	7.4735e-41	5.9927e-37	-//-
FBgn0032066	Lysosomal alpha-mannosidase III(LManIII)	2.00029	46.4276	-4.5367	8.9486e-16	4.1597e-14	sp|O09159|MA2B1_MOUSE Lysosomal alpha-mannosidase OS=Mus musculus OX=10090 GN=Man2b1 PE=1 SV=4//0
FBgn0031940	CG7214 gene product from transcript CG7214-RA(CG7214)	3.98273	99.0979	-4.637	3.6966e-07	4.592e-06	sp|Q26416|CUA1_DROME Adult cuticle protein 1 OS=Drosophila melanogaster OX=7227 GN=Acp1 PE=2 SV=1//2.08876e-10
FBgn0036656	CG13026 gene product from transcript CG13026-RC(CG13026)	4.67517	172.584	-5.2061	2.8204e-06	3.0094e-05	-//-

## Sheet: Young FHV 24h
Table S6. List of diffrentially expressed genes at least two-fold (B).
Young FHV 24h
FLYBASE_GENE_ID	Name	Mean readcount_Young FHV24	Mean readcount_Young Tris24	log2FoldChange	pval	padj	Blast swiss prot
FBgn0013275	Heat-shock-protein-70Aa(Hsp70Aa)	8.33997	0	Inf	5.1012e-05	0.0020614	sp|P02825|HSP71_DROME Major heat shock 70 kDa protein Ab OS=Drosophila melanogaster OX=7227 GN=Hsp70Ab PE=2 SV=3//0
FBgn0086027	ncRNA(snoRNA:Or-CD1)	10.8299	0	Inf	3.0913e-06	0.00020578	-//-
FBgn0038798	Odorant receptor 92a(Or92a)	7.01098	0	Inf	0.0011382	0.023592	sp|Q9VDM1|OR92A_DROME Putative odorant receptor 92a OS=Drosophila melanogaster OX=7227 GN=Or92a PE=3 SV=3//0
FBgn0265343	ncRNA(CR44297)	14.5743	0.257495	5.8227	4.5402e-05	0.0019086	-//-
FBgn0050098	CG30098 gene product from transcript CG30098-RA(CG30098)	68.5746	1.74823	5.2937	3.4038e-13	1.3652e-10	sp|Q9VB68|GRASS_DROME Serine protease grass OS=Drosophila melanogaster OX=7227 GN=grass PE=1 SV=1//1.02305e-25
FBgn0041225	Gustatory receptor 94a(Gr94a)	19.6158	0.696432	4.8159	1.4018e-08	2.0632e-06	sp|Q8IMZ5|GR94A_DROME Putative gustatory receptor 94a OS=Drosophila melanogaster OX=7227 GN=Gr94a PE=2 SV=1//0
FBgn0013278	Heat-shock-protein-70Bb(Hsp70Bb)	77.375	2.77822	4.7996	1.3803e-22	3.6906e-19	sp|Q9BIR7|HSP75_DROME Major heat shock 70 kDa protein Bc OS=Drosophila melanogaster OX=7227 GN=Hsp70Bc PE=2 SV=2//0
FBgn0262683	CG43153 gene product from transcript CG43153-RA(CG43153)	12.5998	0.514991	4.6127	1.708e-05	0.00085631	-//-
FBgn0003411	sisterless A(sisA)	24.6254	1.04465	4.5591	6.6388e-10	1.3655e-07	sp|Q9VZ09|SISA_DROME Protein sisterless A OS=Drosophila melanogaster OX=7227 GN=sisA PE=1 SV=1//2.01011e-112
FBgn0053542	unpaired 3(upd3)	94.9048	4.34909	4.4477	8.6872e-25	3.4842e-21	-//-
FBgn0259738	CG42392 gene product from transcript CG42392-RA(CG42392)	14.0492	0.696432	4.3344	4.0545e-06	0.00026441	-//-
FBgn0036627	Gag-related(Gagr)	1011.18	57.4731	4.137	3.2996e-17	2.7861e-14	-//-
FBgn0043854	slow as molasses(slam)	108.112	6.57275	4.0399	3.1778e-18	3.6415e-15	-//-
FBgn0033830	CG10814 gene product from transcript CG10814-RA(CG10814)	11.0579	0.696432	3.989	6.71e-05	0.0025329	sp|Q9QZU7|BODG_RAT Gamma-butyrobetaine dioxygenase OS=Rattus norvegicus OX=10116 GN=Bbox1 PE=1 SV=1//3.83684e-75
FBgn0085447	still life(sif)	249.28	16.319	3.9331	1.5875e-12	5.7881e-10	sp|P91621|SIF1_DROME Protein still life, isoform SIF type 1 OS=Drosophila melanogaster OX=7227 GN=sif PE=2 SV=2//5.08216e-83
FBgn0264987	ncRNA(CR44138)	206.759	15.1765	3.768	2.4745e-16	1.6541e-13	-//-
FBgn0266098	rugose(rg)	20.3872	1.51256	3.7526	6.1347e-06	0.00037139	sp|Q9W4E2|NBEA_DROME Neurobeachin OS=Drosophila melanogaster OX=7227 GN=rg PE=1 SV=4//1.38123e-21
FBgn0039316	CG11893 gene product from transcript CG11893-RA(CG11893)	26.449	2.0204	3.7105	1.4625e-07	1.5336e-05	-//-
FBgn0034756	CG4373 gene product from transcript CG4373-RA(Cyp6d2)	1094.15	84.7033	3.6912	5.5937e-17	4.2733e-14	sp|Q9W223|CP6D2_DROME Probable cytochrome P450 6d2 OS=Drosophila melanogaster OX=7227 GN=Cyp6d2 PE=2 SV=1//0
FBgn0033403	CG13739 gene product from transcript CG13739-RA(CG13739)	80.0095	7.2651	3.4611	4.5592e-17	3.6572e-14	-//-
FBgn0013276	Heat-shock-protein-70Ab(Hsp70Ab)	13.2643	1.25507	3.4017	8.0943e-05	0.0029784	sp|P02825|HSP71_DROME Major heat shock 70 kDa protein Ab OS=Drosophila melanogaster OX=7227 GN=Hsp70Ab PE=2 SV=3//0
FBgn0041184	Suppressor of cytokine signaling at 36E(Socs36E)	3197.47	305.091	3.3896	3.6284e-22	8.3159e-19	sp|O54928|SOCS5_MOUSE Suppressor of cytokine signaling 5 OS=Mus musculus OX=10090 GN=Socs5 PE=1 SV=2//3.1883e-71
FBgn0040503	CG7763 gene product from transcript CG7763-RB(CG7763)	75.9405	7.27977	3.3829	1.3416e-08	1.9947e-06	sp|O46197|A29AB_DROME Accessory gland protein Acp29AB OS=Drosophila melanogaster OX=7227 GN=Acp29AB PE=2 SV=2//1.12163e-12
FBgn0038838	Turandot B(TotB)	120.733	11.6684	3.3711	0.00010527	0.0037283	sp|Q9VDH4|TOTB_DROME Protein Turandot B OS=Drosophila melanogaster OX=7227 GN=TotB PE=2 SV=1//3.77651e-98
FBgn0039593	Stress induced DNase(Sid)	535.017	52.7762	3.3416	3.0299e-16	1.9443e-13	-//-
FBgn0267157	ncRNA(CR45597)	20.7772	2.11827	3.294	1.9908e-06	0.00014584	-//-
FBgn0035476	CG12766 gene product from transcript CG12766-RA(CG12766)	599.48	61.3826	3.2878	1.0905e-26	5.8318e-23	sp|P07943|ALDR_RAT Aldose reductase OS=Rattus norvegicus OX=10116 GN=Akr1b1 PE=1 SV=3//8.00435e-90
FBgn0267089	ncRNA(CR45533)	64.2428	6.70647	3.2599	1.5966e-05	0.00081552	-//-
FBgn0037974	CG12224 gene product from transcript CG12224-RC(CG12224)	88.2802	9.38401	3.2338	4.4995e-14	1.951e-11	sp|O81884|GALDH_ARATH L-galactose dehydrogenase OS=Arabidopsis thaliana OX=3702 GN=LGALDH PE=1 SV=1//8.27181e-48
FBgn0034480	CG16898 gene product from transcript CG16898-RA(CG16898)	2129.31	272.26	2.9673	7.0929e-09	1.1731e-06	-//-
FBgn0267482	ncRNA(CR45832)	8.4559	1.11011	2.9293	0.0025371	0.043301	-//-
FBgn0051606	CG31606 gene product from transcript CG31606-RB(CG31606)	138.965	18.855	2.8817	4.8561e-09	8.288e-07	-//-
FBgn0266633	ncRNA(CR45140)	227.001	31.1408	2.8658	1.0986e-08	1.6786e-06	-//-
FBgn0034906	CG13561 gene product from transcript CG13561-RB(CG13561)	11.7734	1.63569	2.8476	0.0013457	0.02682	-//-
FBgn0266941	ncRNA(CR45392)	9.49639	1.32396	2.8425	0.0022853	0.040069	-//-
FBgn0005660	Ets at 21C(Ets21C)	828.61	116.804	2.8266	1.2159e-29	1.9507e-25	sp|P29776|ETS6_DROME DNA-binding protein D-ETS-6 OS=Drosophila melanogaster OX=7227 GN=Ets21C PE=2 SV=2//0
FBgn0266162	ncRNA(CR44868)	39.2669	5.5711	2.8173	0.0017406	0.03281	-//-
FBgn0265379	ncRNA(CR44320)	11.7364	1.67218	2.8112	0.00063243	0.015396	-//-
FBgn0065099	small nuclear RNA 7SK(snRNA:7SK)	152.602	21.9631	2.7966	4.2557e-08	5.4185e-06	-//-
FBgn0029955	CG15478 gene product from transcript CG15478-RA(CG15478)	18.2178	2.66975	2.7706	4.4615e-05	0.0018886	-//-
FBgn0286028	ncRNA:CR46348	11.4854	1.7629	2.7038	0.00081821	0.018514	-//-
FBgn0044810	Turandot X(TotX)	6221.37	974.548	2.6744	0.00012038	0.0041353	sp|Q8IN41|TOTX_DROME Protein Turandot X OS=Drosophila melanogaster OX=7227 GN=TotX PE=2 SV=1//1.76431e-100
FBgn0035439	CG14961 gene product from transcript CG14961-RA(CG14961)	106.896	16.8988	2.6612	1.7333e-14	7.9448e-12	-//-
FBgn0052865	ncRNA(alphagamma-element:CR32865)	15.8097	2.50298	2.6591	0.0021519	0.038438	-//-
FBgn0032549	CG4650 gene product from transcript CG4650-RC(CG4650)	28.493	4.53053	2.6529	0.00023728	0.0071153	sp|Q28278|PROC_CANLF Vitamin K-dependent protein C OS=Canis lupus familiaris OX=9615 GN=PROC PE=2 SV=2//1.83714e-21
FBgn0038083	CG5999 gene product from transcript CG5999-RB(CG5999)	395.263	66.854	2.5637	6.8931e-21	1.2287e-17	sp|P36514|UD2C1_RABIT UDP-glucuronosyltransferase 2C1 (Fragment) OS=Oryctolagus cuniculus OX=9986 GN=UGT2C1 PE=2 SV=1//6.6469e-42
FBgn0002543	roundabout 2(robo2)	290.675	49.6237	2.5503	3.7331e-20	5.4446e-17	sp|Q9HCK4|ROBO2_HUMAN Roundabout homolog 2 OS=Homo sapiens OX=9606 GN=ROBO2 PE=1 SV=2//5.24826e-07
FBgn0038309	Ammonium transporter(Amt)	31.1675	5.37191	2.5365	4.3329e-05	0.0018439	sp|Q21565|AMT3_CAEEL Putative ammonium transporter 3 OS=Caenorhabditis elegans OX=6239 GN=amt-3 PE=3 SV=2//2.79518e-104
FBgn0044812	Turandot C(TotC)	51422.6	8891.2	2.532	8.4537e-05	0.0030894	sp|Q8IN43|TOTC_DROME Protein Turandot C OS=Drosophila melanogaster OX=7227 GN=TotC PE=2 SV=1//1.24574e-75
FBgn0038455	CG14907 gene product from transcript CG14907-RA(CG14907)	829.636	143.678	2.5296	1.3848e-09	2.6767e-07	-//-
FBgn0034709	Secreted Wg-interacting molecule(Swim)	3382.41	587.572	2.5252	1.699e-27	1.3628e-23	sp|Q99JR5|TINAL_MOUSE Tubulointerstitial nephritis antigen-like OS=Mus musculus OX=10090 GN=Tinagl1 PE=1 SV=1//2.70837e-92
FBgn0016794	daughter of sevenless(dos)	2334.37	407.272	2.519	2.737e-15	1.3722e-12	sp|Q9VZZ9|DOS_DROME Protein daughter of sevenless OS=Drosophila melanogaster OX=7227 GN=dos PE=1 SV=1//0
FBgn0050121	ncRNA(CR30121)	18.5047	3.28669	2.4932	5.3917e-05	0.0021456	-//-
FBgn0031805	CG9505 gene product from transcript CG9505-RA(CG9505)	686.059	122.74	2.4827	5.7362e-15	2.7887e-12	sp|Q8IS64|ECE_LOCMI Endothelin-converting enzyme homolog OS=Locusta migratoria OX=7004 PE=2 SV=1//6.55138e-20
FBgn0267339	p38c MAP kinase(p38c)	452.021	82.4043	2.4556	8.896e-22	1.784e-18	sp|P83100|MK14C_DROME Putative mitogen-activated protein kinase 14C OS=Drosophila melanogaster OX=7227 GN=p38c PE=2 SV=1//0
FBgn0264953	CG44122 gene product from transcript CG44122-RK(Piezo)	3063.45	561.848	2.4469	4.2048e-19	5.189e-16	sp|M9MSG8|PIEZO_DROME Piezo-type mechanosensitive ion channel component OS=Drosophila melanogaster OX=7227 GN=Piezo PE=2 SV=1//2.77899e-23
FBgn0266637	ncRNA(CR45144)	92.3061	17.0154	2.4396	1.7506e-11	5.201e-09	sp|O15085|ARHGB_HUMAN Rho guanine nucleotide exchange factor 11 OS=Homo sapiens OX=9606 GN=ARHGEF11 PE=1 SV=1//5.15434e-16
FBgn0262531	CG43085 gene product from transcript CG43085-RB(CG43085)	355.733	65.9266	2.4319	0.00032392	0.0090535	-//-
FBgn0032805	CG10337 gene product from transcript CG10337-RA(CG10337)	616.045	116.695	2.4003	1.3428e-08	1.9947e-06	-//-
FBgn0064227	CG14975 gene product from transcript CG14975-RA(Rdh)	18.8868	3.6455	2.3732	0.00012147	0.00416	-//-
FBgn0050160	CG30160 gene product from transcript CG30160-RA(CG30160)	17.4883	3.39859	2.3634	0.00032826	0.0091515	sp|Q76B49|CD63_FELCA CD63 antigen OS=Felis catus OX=9685 GN=CD63 PE=2 SV=3//3.19795e-20
FBgn0264511	ncRNA(CR43910)	20.4102	3.97189	2.3614	8.071e-05	0.0029766	-//-
FBgn0028978	tribbles(trbl)	1891.89	368.728	2.3592	3.9397e-16	2.4309e-13	sp|Q9V3Z1|TRIB_DROME Tribbles OS=Drosophila melanogaster OX=7227 GN=trbl PE=1 SV=1//0
FBgn0031109	Odorant-binding protein 19a(Obp19a)	38.7631	7.62083	2.3467	2.1721e-07	2.1511e-05	sp|Q9VR94|OB19A_DROME General odorant-binding protein 19a OS=Drosophila melanogaster OX=7227 GN=Obp19a PE=2 SV=2//7.25846e-104
FBgn0050088	CG30088 gene product from transcript CG30088-RB(CG30088)	81.495	16.4063	2.3125	5.3068e-06	0.00033127	sp|Q9VB68|GRASS_DROME Serine protease grass OS=Drosophila melanogaster OX=7227 GN=grass PE=1 SV=1//3.38225e-43
FBgn0020416	Imaginal disc growth factor 1(Idgf1)	3904.98	799.197	2.2887	1.1145e-23	3.5759e-20	sp|Q8MM24|IDGF1_DROME Chitinase-like protein Idgf1 OS=Drosophila melanogaster OX=7227 GN=Idgf1 PE=1 SV=2//0
FBgn0011294	antennal protein 5(a5)	74.089	15.2413	2.2813	6.4632e-05	0.0024688	sp|P54185|OBA5_DROME Putative odorant-binding protein A5 OS=Drosophila melanogaster OX=7227 GN=a5 PE=2 SV=2//2.13225e-154
FBgn0033215	CG1942 gene product from transcript CG1942-RA(CG1942)	701.501	144.56	2.2788	4.6188e-08	5.6999e-06	sp|Q54GC1|DGAT2_DICDI Diacylglycerol O-acyltransferase 2 OS=Dictyostelium discoideum OX=44689 GN=dgat2 PE=3 SV=1//3.27746e-70
FBgn0029587	CG14797 gene product from transcript CG14797-RC(CG14797)	27.411	5.76377	2.2497	2.136e-05	0.001026	sp|Q7KW14|CCDCX_DROME Coiled-coil domain-containing protein CG32809 OS=Drosophila melanogaster OX=7227 GN=CG32809 PE=2 SV=1//4.52582e-15
FBgn0042206	Glutathione S transferase D10(GstD10)	293.75	61.9924	2.2444	1.6748e-16	1.1682e-13	sp|P30104|GSTT1_DROER Glutathione S-transferase 1-1 OS=Drosophila erecta OX=7220 GN=GstD1 PE=3 SV=2//1.45247e-108
FBgn0035996	CG3448 gene product from transcript CG3448-RB(CG3448)	277.584	59.0845	2.2321	4.0583e-13	1.588e-10	-//-
FBgn0028494	CG6424 gene product from transcript CG6424-RA(CG6424)	76.8939	16.4056	2.2287	7.7527e-10	1.5355e-07	sp|Q8HYW0|FA13A_BOVIN Protein FAM13A OS=Bos taurus OX=9913 GN=FAM13A PE=2 SV=1//4.91628e-29
FBgn0267693	ncRNA(CR46029)	25.4455	5.49505	2.2112	0.00017962	0.0057402	sp|Q9VEU6|GCYDA_DROME Soluble guanylate cyclase 89Da OS=Drosophila melanogaster OX=7227 GN=Gyc89Da PE=1 SV=2//0
FBgn0039536	CG18437 gene product from transcript CG18437-RF(unc80)	1231.46	266.954	2.2057	7.9898e-10	1.5632e-07	sp|Q9VB11|UNC80_DROME Protein unc-80 homolog OS=Drosophila melanogaster OX=7227 GN=unc80 PE=1 SV=5//0
FBgn0013277	Heat-shock-protein-70Ba(Hsp70Ba)	17.3712	3.76863	2.2046	0.00067203	0.016137	sp|Q9BIR7|HSP75_DROME Major heat shock 70 kDa protein Bc OS=Drosophila melanogaster OX=7227 GN=Hsp70Bc PE=2 SV=2//0
FBgn0266044	ncRNA(CR44809)	55.7238	12.2857	2.1813	5.0715e-06	0.00031907	-//-
FBgn0013279	Heat-shock-protein-70Bc(Hsp70Bc)	23.2583	5.13624	2.179	8.735e-05	0.0031777	sp|Q9BIR7|HSP75_DROME Major heat shock 70 kDa protein Bc OS=Drosophila melanogaster OX=7227 GN=Hsp70Bc PE=2 SV=2//0
FBgn0024836	starry night(stan)	126.825	28.4005	2.1589	2.6926e-06	0.00018593	sp|Q9V5N8|STAN_DROME Protocadherin-like wing polarity protein stan OS=Drosophila melanogaster OX=7227 GN=stan PE=1 SV=4//0
FBgn0033205	CG2064 gene product from transcript CG2064-RA(CG2064)	2233.04	501.808	2.1538	2.8497e-09	5.1953e-07	sp|Q8NBN7|RDH13_HUMAN Retinol dehydrogenase 13 OS=Homo sapiens OX=9606 GN=RDH13 PE=1 SV=2//2.20856e-100
FBgn0003328	scab(scb)	2533.35	569.513	2.1532	1.3755e-20	2.2067e-17	sp|O44386|ITA3_DROME Integrin alpha-PS3 OS=Drosophila melanogaster OX=7227 GN=scb PE=1 SV=2//0
FBgn0031756	CG13992 gene product from transcript CG13992-RC(CG13992)	16.0574	3.63083	2.1449	0.0013909	0.027447	-//-
FBgn0001230	Heat shock protein 68(Hsp68)	1552.76	354.361	2.1315	1.7256e-19	2.307e-16	sp|O97125|HSP68_DROME Heat shock protein 68 OS=Drosophila melanogaster OX=7227 GN=Hsp68 PE=1 SV=1//0
FBgn0262794	CG43175 gene product from transcript CG43175-RB(CG43175)	1209.94	277.848	2.1226	0.0027406	0.045944	-//-
FBgn0261363	Prophenoloxidase 3(PPO3)	80.3684	18.5205	2.1175	1.7773e-08	2.5459e-06	sp|Q9W1V6|PPO3_DROME Phenoloxidase 3 OS=Drosophila melanogaster OX=7227 GN=PPO3 PE=1 SV=1//0
FBgn0053963	ncRNA(CR33963)	18.1192	4.18575	2.114	0.00067954	0.016223	-//-
FBgn0029831	CG5966 gene product from transcript CG5966-RB(CG5966)	4180.5	975.697	2.0992	1.1369e-06	9.1657e-05	sp|P27657|LIPP_RAT Pancreatic triacylglycerol lipase OS=Rattus norvegicus OX=10116 GN=Pnlip PE=1 SV=1//1.54895e-69
FBgn0051446	CG31446 gene product from transcript CG31446-RB(CG31446)	172.593	40.7592	2.0822	6.4202e-08	7.6296e-06	-//-
FBgn0038214	CG9616 gene product from transcript CG9616-RB(CG9616)	106.254	25.126	2.0803	0.00036166	0.0099351	-//-
FBgn0052302	CG32302 gene product from transcript CG32302-RA(CG32302)	178.214	42.4126	2.071	0.0006105	0.014976	-//-
FBgn0263039	ncRNA(CR43334)	57.2109	13.6493	2.0675	4.3916e-05	0.0018639	-//-
FBgn0033266	Suppressor of Cytokine Signaling at 44A(Socs44A)	1016.24	242.712	2.0659	1.7551e-17	1.6531e-14	sp|Q8VHQ2|SOCS7_MOUSE Suppressor of cytokine signaling 7 OS=Mus musculus OX=10090 GN=Socs7 PE=1 SV=1//4.73299e-21
FBgn0067102	Ceramide glucosyltransferase(GlcT-1)	864.396	206.472	2.0657	3.7334e-18	3.993e-15	sp|Q16739|CEGT_HUMAN Ceramide glucosyltransferase OS=Homo sapiens OX=9606 GN=UGCG PE=1 SV=1//1.19903e-139
FBgn0040104	CG3410 gene product from transcript CG3410-RA(lectin-24A)	122.596	29.3342	2.0633	1.2175e-11	3.7563e-09	sp|Q9U968|A29AB_DROSI Accessory gland protein Acp29AB OS=Drosophila simulans OX=7240 GN=Acp29AB PE=3 SV=1//1.18315e-19
FBgn0039286	distal antenna(dan)	20.2886	4.86751	2.0594	0.00071675	0.016689	sp|Q9VBW6|DAN_DROME Protein distal antenna OS=Drosophila melanogaster OX=7227 GN=dan PE=1 SV=2//0
FBgn0015035	Cytochrome P450-4e3(Cyp4e3)	1792.32	432.195	2.0521	6.807e-06	0.00040149	sp|Q9VL92|CP4E3_DROME Cytochrome P450 4e3 OS=Drosophila melanogaster OX=7227 GN=Cyp4e3 PE=2 SV=1//0
FBgn0039681	CG7582 gene product from transcript CG7582-RB(CG7582)	468.639	113.524	2.0455	4.6296e-16	2.7509e-13	sp|Q3MHQ7|TM86A_BOVIN Lysoplasmalogenase-like protein TMEM86A OS=Bos taurus OX=9913 GN=TMEM86A PE=2 SV=1//4.22202e-27
FBgn0264748	CG44006 gene product from transcript CG44006-RA(CG44006)	947.652	229.793	2.044	0.0010653	0.022787	-//-
FBgn0038484	CG5246 gene product from transcript CG5246-RA(CG5246)	609.892	148.104	2.0419	8.6974e-17	6.3424e-14	sp|Q17025|CTR2_ANOGA Chymotrypsin-2 OS=Anopheles gambiae OX=7165 GN=CHYM2 PE=2 SV=3//2.35107e-51
FBgn0051140	CG31140 gene product from transcript CG31140-RB(CG31140)	691.933	168.268	2.0399	1.1534e-10	2.8949e-08	sp|Q6P5E8|DGKQ_MOUSE Diacylglycerol kinase theta OS=Mus musculus OX=10090 GN=Dgkq PE=1 SV=1//8.03276e-53
FBgn0086913	CG34410 gene product from transcript CG34410-RG(Rab26)	183.328	44.7519	2.0344	8.3969e-11	2.2084e-08	sp|Q9VP48|RAB26_DROME Ras-related protein Rab-26 OS=Drosophila melanogaster OX=7227 GN=Rab26 PE=2 SV=2//0
FBgn0052194	ncRNA(CR32194)	18.8538	4.62125	2.0285	0.00056626	0.014194	-//-
FBgn0031432	CG9964 gene product from transcript CG9964-RC(Cyp309a1)	1405.86	350.822	2.0026	1.8491e-08	2.5945e-06	sp|Q9VQD2|CP391_DROME Probable cytochrome P450 309a1 OS=Drosophila melanogaster OX=7227 GN=Cyp309a1 PE=1 SV=4//0
FBgn0039644	CG11897 gene product from transcript CG11897-RB(CG11897)	1632.12	415.376	1.9743	1.7312e-17	1.6531e-14	sp|P91660|L259_DROME Probable multidrug resistance-associated protein lethal(2)03659 OS=Drosophila melanogaster OX=7227 GN=l(2)03659 PE=2 SV=4//0
FBgn0003209	CG12437 gene product from transcript CG12437-RB(raw)	2922.36	754.07	1.9544	1.8547e-17	1.6531e-14	-//-
FBgn0263241	Molybdenum cofactor synthesis 1 ortholog(Mocs1)	618.594	160.041	1.9506	1.3497e-15	7.4665e-13	sp|Q8IQF1|MOCS1_DROME Molybdenum cofactor biosynthesis protein 1 OS=Drosophila melanogaster OX=7227 GN=Mocs1 PE=2 SV=1//0
FBgn0031888	PDGF- and VEGF-related factor 2(Pvf2)	273.252	71.4855	1.9345	3.3593e-08	4.3816e-06	-//-
FBgn0262983	CG43291 gene product from transcript CG43291-RC(CG43291)	37.5396	9.91711	1.9204	0.0020325	0.036721	-//-
FBgn0083949	CG34113 gene product from transcript CG34113-RP(CG34113)	215.409	57.2558	1.9116	4.3997e-08	5.5578e-06	sp|P0C5H6|TUTLA_RAT Protein turtle homolog A OS=Rattus norvegicus OX=10116 GN=Igsf9 PE=1 SV=1//1.19241e-17
FBgn0031471	CG3117 gene product from transcript CG3117-RB(CG3117)	34.7017	9.28614	1.9019	1.894e-05	0.00093782	sp|Q9GRW0|PPAF2_HOLDI Phenoloxidase-activating factor 2 OS=Holotrichia diomphalia OX=33394 GN=PPAF2 PE=1 SV=1//5.9478e-50
FBgn0015351	CG14906 gene product from transcript CG14906-RC(CG14906)	172.071	46.0516	1.9017	2.0446e-11	5.9639e-09	sp|Q3U034|METL4_MOUSE Methyltransferase-like protein 4 OS=Mus musculus OX=10090 GN=Mettl4 PE=2 SV=1//1.0093e-29
FBgn0263257	Cyclic nucleotide-gated ion channel-like(Cngl)	722.135	193.873	1.8972	7.3595e-06	0.00042519	sp|Q9JJZ8|CNGA3_MOUSE Cyclic nucleotide-gated cation channel alpha-3 OS=Mus musculus OX=10090 GN=Cnga3 PE=1 SV=2//8.42273e-123
FBgn0259918	CG42447 gene product from transcript CG42447-RA(inaF-B)	99.6224	26.8991	1.8889	8.4818e-09	1.3745e-06	-//-
FBgn0038299	Serpin 88Eb(Spn88Eb)	997.241	270.501	1.8823	1.572e-15	8.4065e-13	sp|Q9VFC2|SP88E_DROME Serine protease inhibitor 88Ea OS=Drosophila melanogaster OX=7227 GN=Spn88Ea PE=2 SV=1//7.35066e-147
FBgn0033928	CG13941 gene product from transcript CG13941-RA(Arc2)	707.447	192.918	1.8746	6.5757e-15	3.1028e-12	sp|Q7JV70|ARC2_DROME Activity-regulated cytoskeleton associated protein 2 OS=Drosophila melanogaster OX=7227 GN=Arc2 PE=2 SV=1//2.87515e-140
FBgn0015543	ncRNA(snoRNA:Me28S-A1322)	39.9274	10.9502	1.8664	4.3059e-05	0.0018421	-//-
FBgn0067311	Chemosensory protein B 38b(CheB38b)	54.78	15.299	1.8402	0.00026786	0.0078274	-//-
FBgn0051793	CG31793 gene product from transcript CG31793-RC(CG31793)	1342.82	375.097	1.8399	2.6228e-15	1.3573e-12	sp|P91660|L259_DROME Probable multidrug resistance-associated protein lethal(2)03659 OS=Drosophila melanogaster OX=7227 GN=l(2)03659 PE=2 SV=4//1.19631e-18
FBgn0000535	ether a go-go(eag)	339.549	95.3415	1.8324	1.0018e-08	1.5757e-06	sp|Q02280|KCNAE_DROME Potassium voltage-gated channel protein eag OS=Drosophila melanogaster OX=7227 GN=eag PE=1 SV=2//4.30041e-93
FBgn0029766	CG15784 gene product from transcript CG15784-RB(CG15784)	3873.32	1089	1.8306	7.7947e-16	4.4661e-13	-//-
FBgn0052677	CG32677 gene product from transcript CG32677-RE(X11Lbeta)	324.049	92.2833	1.8121	2.1878e-06	0.00015811	sp|O17583|LIN10_CAEEL Protein lin-10 OS=Caenorhabditis elegans OX=6239 GN=lin-10 PE=1 SV=1//2.45921e-170
FBgn0037151	CG7130 gene product from transcript CG7130-RA(CG7130)	452.19	129.072	1.8087	5.7384e-13	2.141e-10	sp|Q2KIT4|DNJB4_BOVIN DnaJ homolog subfamily B member 4 OS=Bos taurus OX=9913 GN=DNAJB4 PE=2 SV=1//1.45585e-27
FBgn0030189	CG2909 gene product from transcript CG2909-RA(CG2909)	646.931	185.263	1.804	4.074e-12	1.3339e-09	-//-
FBgn0029507	Tetraspanin 42Ed(Tsp42Ed)	916.366	262.66	1.8027	3.3623e-14	1.4984e-11	sp|P28648|CD63_RAT CD63 antigen OS=Rattus norvegicus OX=10116 GN=Cd63 PE=1 SV=2//7.8407e-20
FBgn0030913	CG6123 gene product from transcript CG6123-RB(CG6123)	127.01	36.4138	1.8024	2.5731e-09	4.8e-07	-//-
FBgn0034731	CG10384 gene product from transcript CG10384-RE(CG10384)	170.127	48.8878	1.7991	4.2345e-10	9.306e-08	sp|Q08BJ2|KHDR2_DANRE KH domain-containing, RNA-binding, signal transduction-associated protein 2 OS=Danio rerio OX=7955 GN=khdrbs2 PE=2 SV=1//3.64986e-42
FBgn0040697	tipE homolog 3(Teh3)	65.2453	18.8721	1.7896	1.1306e-06	9.1608e-05	-//-
FBgn0035453	CG10357 gene product from transcript CG10357-RC(CG10357)	39.2958	11.3895	1.7867	8.03e-05	0.0029683	sp|Q6PA23|LIPHA_XENLA Lipase member H-A OS=Xenopus laevis OX=8355 GN=liph-a PE=2 SV=1//6.1065e-32
FBgn0264087	Slowpoke binding protein(Slob)	813.106	235.844	1.7856	2.3951e-13	9.8525e-11	sp|Q8IPH9|SLOB_DROME Slowpoke-binding protein OS=Drosophila melanogaster OX=7227 GN=Slob PE=1 SV=2//0
FBgn0037238	CG1090 gene product from transcript CG1090-RI(CG1090)	459.685	133.474	1.7841	1.8941e-07	1.9232e-05	sp|Q9VN12|NCKXH_DROME Probable sodium/potassium/calcium exchanger CG1090 OS=Drosophila melanogaster OX=7227 GN=CG1090 PE=2 SV=4//1.28432e-31
FBgn0039808	CG12071 gene product from transcript CG12071-RE(CG12071)	131.117	38.3653	1.773	3.2061e-09	5.7792e-07	sp|Q9C0F3|ZN436_HUMAN Zinc finger protein 436 OS=Homo sapiens OX=9606 GN=ZNF436 PE=1 SV=2//4.57143e-06
FBgn0050090	CG30090 gene product from transcript CG30090-RA(CG30090)	618.646	181.254	1.7711	2.2201e-05	0.00106	sp|Q9VB68|GRASS_DROME Serine protease grass OS=Drosophila melanogaster OX=7227 GN=grass PE=1 SV=1//2.28572e-41
FBgn0031913	CG5958 gene product from transcript CG5958-RA(CG5958)	6491.33	1902.94	1.7703	1.938e-08	2.6803e-06	sp|A6JFQ6|CLVS1_RAT Clavesin-1 OS=Rattus norvegicus OX=10116 GN=Clvs1 PE=1 SV=1//1.27813e-39
FBgn0037396	CG11459 gene product from transcript CG11459-RB(CG11459)	1254.97	368.007	1.7698	1.4179e-05	0.00073141	sp|Q26636|CATL_SARPE Cathepsin L OS=Sarcophaga peregrina OX=7386 PE=1 SV=1//1.38977e-75
FBgn0040251	CG6658 gene product from transcript CG6658-RB(Ugt86Di)	54.0429	15.9786	1.758	2.8743e-06	0.00019457	sp|P16662|UD2B7_HUMAN UDP-glucuronosyltransferase 2B7 OS=Homo sapiens OX=9606 GN=UGT2B7 PE=1 SV=2//1.5938e-60
FBgn0039883	Rho GTPase activating protein at 100F(RhoGAP100F)	501.868	148.81	1.7538	4.6655e-06	0.0002994	sp|Q9V9S7|SYDE_DROME Rho GTPase-activating protein 100F OS=Drosophila melanogaster OX=7227 GN=RhoGAP100F PE=1 SV=2//0
FBgn0005614	transient receptor potential-like(trpl)	3069.26	912.564	1.7499	6.4579e-09	1.0792e-06	sp|P48994|TRPL_DROME Transient-receptor-potential-like protein OS=Drosophila melanogaster OX=7227 GN=trpl PE=1 SV=2//0
FBgn0031116	CG1695 gene product from transcript CG1695-RC(CG1695)	204.45	60.7912	1.7498	4.7593e-10	1.0046e-07	sp|Q8BPQ7|SGSM1_MOUSE Small G protein signaling modulator 1 OS=Mus musculus OX=10090 GN=Sgsm1 PE=1 SV=2//1.89865e-106
FBgn0002917	narrow abdomen(na)	427.515	127.493	1.7456	4.2769e-12	1.3723e-09	sp|Q8BXR5|NALCN_MOUSE Sodium leak channel non-selective protein OS=Mus musculus OX=10090 GN=Nalcn PE=1 SV=2//0
FBgn0004896	forkhead domain 59A(fd59A)	32.0295	9.56482	1.7436	0.00025457	0.0075269	sp|Q02361|FD3_DROME Fork head domain-containing protein FD3 OS=Drosophila melanogaster OX=7227 GN=fd59A PE=2 SV=2//0
FBgn0032264	Lipase 4(Lip4)	3414.75	1030.48	1.7285	2.3727e-08	3.2259e-06	sp|O46108|LIP3_DROME Lipase 3 OS=Drosophila melanogaster OX=7227 GN=Lip3 PE=2 SV=1//1.27961e-102
FBgn0063493	Glutathione S transferase E7(GstE7)	2130.98	643.76	1.7269	0.0010335	0.022255	sp|P46430|GSTT1_MANSE Glutathione S-transferase 1 OS=Manduca sexta OX=7130 GN=GST1 PE=2 SV=1//6.86252e-58
FBgn0013343	Syntaxin 1A(Syx1A)	603.454	183.526	1.7173	7.255e-12	2.2822e-09	sp|Q24547|STX1A_DROME Syntaxin-1A OS=Drosophila melanogaster OX=7227 GN=Syx1A PE=1 SV=1//0
FBgn0265068	ncRNA(CR44179)	409.35	124.651	1.7154	3.7519e-12	1.2807e-09	sp|Q6GMR7|FAAH2_HUMAN Fatty-acid amide hydrolase 2 OS=Homo sapiens OX=9606 GN=FAAH2 PE=2 SV=1//1.08014e-117
FBgn0034766	Odorant-binding protein 59a(Obp59a)	57.5883	17.5482	1.7145	7.2713e-06	0.0004242	sp|Q5TYJ0|OBP71_ANOGA General odorant-binding protein 71 OS=Anopheles gambiae OX=7165 GN=Obp71 PE=3 SV=4//3.29768e-17
FBgn0050280	CG30280 gene product from transcript CG30280-RB(CG30280)	322.607	98.4057	1.713	0.00011961	0.0041215	sp|Q95LU3|FBCD1_MACFA Fibrinogen C domain-containing protein 1 OS=Macaca fascicularis OX=9541 GN=FIBCD1 PE=2 SV=1//9.68436e-53
FBgn0266807	ncRNA(CR45269)	23.0302	7.02943	1.7121	0.0017025	0.032285	-//-
FBgn0260866	defense repressor 1(dnr1)	1939.13	595.086	1.7042	1.0896e-13	4.6003e-11	sp|Q8WY64|MYLIP_HUMAN E3 ubiquitin-protein ligase MYLIP OS=Homo sapiens OX=9606 GN=MYLIP PE=1 SV=2//2.69403e-18
FBgn0039666	CG11501 gene product from transcript CG11501-RA(Diedel)	271.453	83.3395	1.7036	3.1507e-05	0.0014159	sp|Q9VAK8|DIE_DROME Protein Diedel OS=Drosophila melanogaster OX=7227 GN=Diedel PE=1 SV=1//2.64206e-79
FBgn0010041	Glutathione S transferase D5(GstD5)	122.204	37.5741	1.7015	2.1253e-05	0.0010239	sp|Q9VG95|GSTD5_DROME Glutathione S-transferase D5 OS=Drosophila melanogaster OX=7227 GN=GstD5 PE=1 SV=2//7.66883e-153
FBgn0010038	Glutathione S transferase D2(GstD2)	192.36	59.9508	1.682	0.00080214	0.018228	sp|Q9VG98|GSTD2_DROME Glutathione S-transferase D2 OS=Drosophila melanogaster OX=7227 GN=GstD2 PE=1 SV=1//4.99917e-158
FBgn0052547	CG32547 gene product from transcript CG32547-RD(CG32547)	79.7438	24.8535	1.6819	1.317e-06	0.00010306	sp|Q61041|NPY4R_MOUSE Neuropeptide Y receptor type 4 OS=Mus musculus OX=10090 GN=Npy4r PE=2 SV=2//1.61825e-09
FBgn0052432	CG32432 gene product from transcript CG32432-RB(CG32432)	461.464	143.846	1.6817	3.5193e-06	0.0002314	-//-
FBgn0000964	traffic jam(tj)	24.7497	7.79476	1.6668	0.0013289	0.026616	sp|P54842|MAFB_RAT Transcription factor MafB OS=Rattus norvegicus OX=10116 GN=Mafb PE=1 SV=1//1.89207e-25
FBgn0050281	CG30281 gene product from transcript CG30281-RA(CG30281)	1003.99	316.559	1.6652	1.3589e-05	0.00071246	sp|A2AV25|FBCD1_MOUSE Fibrinogen C domain-containing protein 1 OS=Mus musculus OX=10090 GN=Fibcd1 PE=2 SV=1//1.60005e-52
FBgn0259210	prominin(prom)	224.499	71.8704	1.6432	6.9596e-08	8.0908e-06	sp|O54990|PROM1_MOUSE Prominin-1 OS=Mus musculus OX=10090 GN=Prom1 PE=1 SV=1//8.0562e-11
FBgn0023531	CG32809 gene product from transcript CG32809-RJ(CG32809)	769.398	246.948	1.6395	7.9047e-07	6.6898e-05	sp|Q7KW14|CCDCX_DROME Coiled-coil domain-containing protein CG32809 OS=Drosophila melanogaster OX=7227 GN=CG32809 PE=2 SV=1//0
FBgn0010401	CG3250 gene product from transcript CG3250-RB(Os-C)	306.287	98.7282	1.6333	2.7174e-10	6.3182e-08	sp|Q23971|OSC_DROME Antennal-specific protein OS-C OS=Drosophila melanogaster OX=7227 GN=Os-C PE=2 SV=3//4.85941e-54
FBgn0259108	CG34387 gene product from transcript CG34387-RF(futsch)	1526.99	495.392	1.6241	2.9288e-12	1.0214e-09	sp|Q9W596|FUTSC_DROME Microtubule-associated protein futsch OS=Drosophila melanogaster OX=7227 GN=futsch PE=1 SV=4//0
FBgn0053494	CG33494 gene product from transcript CG33494-RB(CG33494)	4705.99	1532.81	1.6183	0.00035635	0.0098229	-//-
FBgn0053469	CG33469 gene product from transcript CG33469-RB(CG33469)	164.361	53.5533	1.6178	3.8292e-07	3.5925e-05	-//-
FBgn0039114	Lipid storage droplet-1(Lsd-1)	29453	9616.26	1.6149	4.9082e-13	1.8748e-10	sp|Q9VCI3|LSD1_DROME Lipid storage droplets surface-binding protein 1 OS=Drosophila melanogaster OX=7227 GN=Lsd-1 PE=2 SV=2//0
FBgn0028476	Ubiquitin specific protease 1(Usp1)	1935.34	634.307	1.6093	1.7575e-12	6.2658e-10	sp|Q29RP1|UBP1_BOVIN Ubiquitin carboxyl-terminal hydrolase 1 OS=Bos taurus OX=9913 GN=USP1 PE=2 SV=1//2.52231e-16
FBgn0030844	pickpocket 23(ppk23)	29.2987	9.61905	1.6069	0.0010797	0.022942	sp|O61365|NACH_DROME Sodium channel protein Nach OS=Drosophila melanogaster OX=7227 GN=Nach PE=2 SV=2//1.78994e-20
FBgn0039006	CG12800 gene product from transcript CG12800-RA(Cyp6d4)	453.721	149.123	1.6053	7.677e-11	2.0527e-08	sp|Q9VCW1|CP6D4_DROME Probable cytochrome P450 6d4 OS=Drosophila melanogaster OX=7227 GN=Cyp6d4 PE=2 SV=1//0
FBgn0004606	Zn finger homeodomain 1(zfh1)	566.538	186.532	1.6027	1.8019e-08	2.5582e-06	sp|P28166|ZFH1_DROME Zinc finger protein 1 OS=Drosophila melanogaster OX=7227 GN=zfh1 PE=1 SV=2//0
FBgn0263354	CG42784 gene product from transcript CG42784-RF(CG42784)	125.19	41.2492	1.6017	3.0911e-06	0.00020578	-//-
FBgn0010278	Structure specific recognition protein(Ssrp)	489.063	161.207	1.6011	3.7854e-11	1.0471e-08	sp|Q05344|SSRP1_DROME FACT complex subunit Ssrp1 OS=Drosophila melanogaster OX=7227 GN=Ssrp PE=1 SV=2//4.11846e-54
FBgn0032981	CG3635 gene product from transcript CG3635-RB(CG3635)	63.5616	20.9876	1.5986	2.0735e-05	0.001005	sp|O46108|LIP3_DROME Lipase 3 OS=Drosophila melanogaster OX=7227 GN=Lip3 PE=2 SV=1//5.01963e-94
FBgn0266450	Kruppel homolog 1(Kr-h1)	135.109	44.9551	1.5876	0.00029602	0.0084353	sp|P08155|KRH1_DROME Krueppel homolog 1 OS=Drosophila melanogaster OX=7227 GN=Kr-h1 PE=2 SV=2//0
FBgn0030613	Rab3 GDP-GTP exchange factor(Rab3-GEF)	663.262	222.377	1.5766	2.5463e-05	0.0011894	sp|Q9VXY2|MADD_DROME MAP kinase-activating death domain protein OS=Drosophila melanogaster OX=7227 GN=Rab3-GEF PE=2 SV=2//0
FBgn0038837	CG3822 gene product from transcript CG3822-RA(CG3822)	111.105	37.2579	1.5763	9.1007e-07	7.4873e-05	sp|P39087|GRIK2_MOUSE Glutamate receptor ionotropic, kainate 2 OS=Mus musculus OX=10090 GN=Grik2 PE=1 SV=4//0
FBgn0261714	Calphotin(Cpn)	326.695	110.344	1.5659	2.1688e-09	4.0933e-07	sp|Q02910|CPN_DROME Calphotin OS=Drosophila melanogaster OX=7227 GN=Cpn PE=2 SV=2//3.05119e-160
FBgn0024943	CG11219 gene product from transcript CG11219-RA(PIP82)	550.171	186.449	1.5611	1.6161e-10	3.9889e-08	-//-
FBgn0083991	CG34155 gene product from transcript CG34155-RA(CG34155)	96.9827	32.9173	1.5589	7.1304e-07	6.1501e-05	-//-
FBgn0032934	CG8679 gene product from transcript CG8679-RA(CG8679)	163.429	55.5908	1.5557	5.0904e-08	6.1868e-06	sp|Q8NAG6|ANKL1_HUMAN Ankyrin repeat and LEM domain-containing protein 1 OS=Homo sapiens OX=9606 GN=ANKLE1 PE=1 SV=2//2.49124e-39
FBgn0002938	neither inactivation nor afterpotential C(ninaC)	4802.88	1635.65	1.554	2.1129e-11	6.0532e-09	sp|P10676|NINAC_DROME Neither inactivation nor afterpotential protein C OS=Drosophila melanogaster OX=7227 GN=ninaC PE=1 SV=2//0
FBgn0267435	chaoptin(chp)	2315.15	795.67	1.5409	3.6827e-11	1.0365e-08	sp|P12024|CHAO_DROME Chaoptin OS=Drosophila melanogaster OX=7227 GN=chp PE=1 SV=2//0
FBgn0030716	CG9170 gene product from transcript CG9170-RC(CG9170)	489.698	168.415	1.5399	4.1297e-10	9.2019e-08	sp|Q9UPV0|CE164_HUMAN Centrosomal protein of 164 kDa OS=Homo sapiens OX=9606 GN=CEP164 PE=1 SV=3//4.30743e-18
FBgn0260499	quiver(qvr)	1763.45	608.2	1.5358	1.5065e-06	0.00011401	sp|B5A5T4|QVR_DROME Protein quiver OS=Drosophila melanogaster OX=7227 GN=qvr PE=1 SV=2//7.41903e-104
FBgn0035715	CG10103 gene product from transcript CG10103-RD(CG10103)	1464.3	505.361	1.5348	1.5848e-11	4.7972e-09	sp|Q3ZBV1|IST1_BOVIN IST1 homolog OS=Bos taurus OX=9913 GN=IST1 PE=2 SV=1//1.64743e-63
FBgn0037327	pancreatic eIF-2alpha kinase(PEK)	1048.3	362.146	1.5334	4.0939e-11	1.1132e-08	sp|Q9NIV1|E2AK3_DROME Eukaryotic translation initiation factor 2-alpha kinase OS=Drosophila melanogaster OX=7227 GN=PEK PE=1 SV=2//0
FBgn0260660	Multiplexin(Mp)	438.126	151.669	1.5304	4.4153e-10	9.5722e-08	sp|P39059|COFA1_HUMAN Collagen alpha-1(XV) chain OS=Homo sapiens OX=9606 GN=COL15A1 PE=1 SV=2//1.74282e-51
FBgn0029834	CG5937 gene product from transcript CG5937-RD(CG5937)	188.727	65.4708	1.5274	8.4542e-08	9.6192e-06	sp|Q3UGY8|BIG3_MOUSE Brefeldin A-inhibited guanine nucleotide-exchange protein 3 OS=Mus musculus OX=10090 GN=Arfgef3 PE=1 SV=1//1.90612e-22
FBgn0261856	pseudo(CR42785)	36.6525	12.7608	1.5222	0.00038506	0.01047	-//-
FBgn0037555	transcriptional Adaptor 2b(Ada2b)	708.354	247.075	1.5195	1.1169e-10	2.8901e-08	sp|Q8I8V0|TAD2B_DROME Transcriptional adapter 2B OS=Drosophila melanogaster OX=7227 GN=Ada2b PE=1 SV=1//2.36087e-107
FBgn0023524	CG3078 gene product from transcript CG3078-RA(CG3078)	220.545	76.9983	1.5182	2.0267e-07	2.0321e-05	sp|Q9Y115|UN93L_DROME UNC93-like protein OS=Drosophila melanogaster OX=7227 GN=CG4928 PE=2 SV=1//4.44392e-08
FBgn0264386	Ca[2+]-channel protein alpha[[1]] subunit T(Ca-alpha1T)	1326.93	464.197	1.5153	1.952e-06	0.00014365	sp|Q9EQ60|CAC1H_RAT Voltage-dependent T-type calcium channel subunit alpha-1H OS=Rattus norvegicus OX=10116 GN=Cacna1h PE=2 SV=2//1.11273e-12
FBgn0024189	sticks and stones(sns)	209.831	73.6958	1.5096	6.6753e-07	5.8842e-05	sp|Q9QZS7|NPHN_MOUSE Nephrin OS=Mus musculus OX=10090 GN=Nphs1 PE=1 SV=2//1.36789e-142
FBgn0035880	CG17352 gene product from transcript CG17352-RA(CG17352)	1059.76	372.465	1.5086	2.1638e-10	5.1813e-08	sp|Q8NC67|NETO2_HUMAN Neuropilin and tolloid-like protein 2 OS=Homo sapiens OX=9606 GN=NETO2 PE=1 SV=1//1.47357e-07
FBgn0264606	CG43955 gene product from transcript CG43955-RD(Fife)	464.985	163.657	1.5065	7.5993e-10	1.524e-07	sp|Q9JIS1|RIMS2_RAT Regulating synaptic membrane exocytosis protein 2 OS=Rattus norvegicus OX=10116 GN=Rims2 PE=1 SV=1//1.2272e-15
FBgn0040294	Plenty of SH3s(POSH)	326.767	115.572	1.4995	2.6715e-09	4.9262e-07	sp|Q8TEJ3|SH3R3_HUMAN E3 ubiquitin-protein ligase SH3RF3 OS=Homo sapiens OX=9606 GN=SH3RF3 PE=1 SV=2//3.30781e-15
FBgn0003380	Shaker(Sh)	1416.86	502.52	1.4954	5.2129e-05	0.0020874	sp|P08510|KCNAS_DROME Potassium voltage-gated channel protein Shaker OS=Drosophila melanogaster OX=7227 GN=Sh PE=1 SV=3//0
FBgn0034312	CG10916 gene product from transcript CG10916-RB(CG10916)	853.285	303.681	1.4905	5.6755e-10	1.1825e-07	-//-
FBgn0000206	bride of sevenless(boss)	295.695	105.349	1.4889	2.4194e-08	3.2617e-06	sp|P22815|BOSS_DROME Protein bride of sevenless OS=Drosophila melanogaster OX=7227 GN=boss PE=2 SV=3//0
FBgn0030013	CG1583 gene product from transcript CG1583-RC(GIIIspla2)	2277.53	817.633	1.4779	3.8453e-05	0.0016718	sp|P16354|PA23_HELSU Phospholipase A2 isozymes PA3A/PA3B/PA5 OS=Heloderma suspectum OX=8554 PE=1 SV=3//4.68587e-24
FBgn0010473	turtle(tutl)	1124.09	405.243	1.4719	6.7845e-05	0.002555	sp|Q967D7|TUTL_DROME Protein turtle OS=Drosophila melanogaster OX=7227 GN=tutl PE=1 SV=2//0
FBgn0038693	CG5237 gene product from transcript CG5237-RE(unc79)	974.581	352.132	1.4687	4.6761e-10	1.0003e-07	sp|Q9P2D8|UNC79_HUMAN Protein unc-79 homolog OS=Homo sapiens OX=9606 GN=UNC79 PE=2 SV=4//3.73527e-23
FBgn0040238	Bestrophin 1(Best1)	1267.99	458.679	1.467	2.9405e-10	6.7391e-08	sp|Q8BGM5|BEST2_MOUSE Bestrophin-2 OS=Mus musculus OX=10090 GN=Best2 PE=2 SV=1//7.78003e-126
FBgn0266414	ncRNA(CR45054)	38.5059	13.9392	1.4659	0.00067039	0.016137	-//-
FBgn0243512	puckered(puc)	908.03	329.434	1.4628	2.6621e-10	6.2806e-08	sp|Q0IID7|DUS10_BOVIN Dual specificity protein phosphatase 10 OS=Bos taurus OX=9913 GN=DUSP10 PE=2 SV=1//6.58306e-32
FBgn0011676	Nitric oxide synthase(Nos)	155.339	56.3605	1.4627	0.00016885	0.0054831	sp|Q27571|NOS_DROME Nitric oxide synthase OS=Drosophila melanogaster OX=7227 GN=Nos PE=2 SV=3//0
FBgn0262636	datilografo(dati)	285.451	103.573	1.4626	8.3558e-07	6.9632e-05	sp|Q8TF68|ZN384_HUMAN Zinc finger protein 384 OS=Homo sapiens OX=9606 GN=ZNF384 PE=1 SV=2//1.94124e-14
FBgn0032151	nicotinic Acetylcholine Receptor alpha6(nAChRalpha6)	353.23	128.208	1.4621	4.9069e-05	0.0020133	sp|P48180|ACH1_CAEEL Acetylcholine receptor subunit alpha-type acr-16 OS=Caenorhabditis elegans OX=6239 GN=acr-16 PE=2 SV=1//3.24546e-139
FBgn0032800	CG10137 gene product from transcript CG10137-RA(CG10137)	281.873	102.502	1.4594	1.5964e-08	2.3283e-06	sp|Q80V31|CE104_MOUSE Centrosomal protein of 104 kDa OS=Mus musculus OX=10090 GN=Cep104 PE=1 SV=1//1.03378e-54
FBgn0263456	nervous wreck(nwk)	1408.27	512.28	1.4589	4.2553e-06	0.00027417	sp|O94868|FCSD2_HUMAN F-BAR and double SH3 domains protein 2 OS=Homo sapiens OX=9606 GN=FCHSD2 PE=1 SV=3//1.04447e-24
FBgn0051514	ncRNA(CR31514)	82.0819	29.8635	1.4587	6.9136e-06	0.00040628	-//-
FBgn0267541	ncRNA(CR45881)	34.1709	12.4344	1.4584	0.00093751	0.020519	-//-
FBgn0039044	CG33336 gene product from transcript CG33336-RB(p53)	328.878	119.887	1.4559	8.9781e-09	1.4404e-06	sp|P10361|P53_RAT Cellular tumor antigen p53 OS=Rattus norvegicus OX=10116 GN=Tp53 PE=1 SV=1//3.30667e-11
FBgn0085419	Rad, Gem/Kir family member 2(Rgk2)	146.17	53.4245	1.4521	5.9756e-07	5.3557e-05	sp|O35929|REM1_MOUSE GTP-binding protein REM 1 OS=Mus musculus OX=10090 GN=Rem1 PE=1 SV=1//1.18605e-21
FBgn0085434	Na channel protein 60E(NaCP60E)	1929.83	705.486	1.4518	0.00017303	0.0055742	sp|Q9W0Y8|SCN60_DROME Sodium channel protein 60E OS=Drosophila melanogaster OX=7227 GN=NaCP60E PE=2 SV=6//0
FBgn0264542	CG43921 gene product from transcript CG43921-RA(CG43921)	341.278	124.904	1.4501	9.6397e-09	1.5312e-06	sp|Q8CG80|SHF_MOUSE SH2 domain-containing adapter protein F OS=Mus musculus OX=10090 GN=Shf PE=1 SV=2//4.94567e-33
FBgn0050419	CG30419 gene product from transcript CG30419-RA(CG30419)	65.9873	24.2335	1.4452	0.00068836	0.016302	-//-
FBgn0034789	Phosphatidylinositol 4-phosphate 5-kinase at 59B(PIP5K59B)	382.786	140.873	1.4421	3.7918e-07	3.5784e-05	sp|P70182|PI51A_MOUSE Phosphatidylinositol 4-phosphate 5-kinase type-1 alpha OS=Mus musculus OX=10090 GN=Pip5k1a PE=1 SV=2//3.54729e-173
FBgn0263111	cacophony(cac)	771.331	284.46	1.4391	0.00078439	0.017926	sp|P91645|CAC1A_DROME Voltage-dependent calcium channel type A subunit alpha-1 OS=Drosophila melanogaster OX=7227 GN=cac PE=1 SV=3//0
FBgn0264704	ncRNA(CR43973)	39.1749	14.4476	1.4391	0.00039026	0.010576	-//-
FBgn0011703	Ribonucleoside diphosphate reductase large subunit(RnrL)	80.8129	29.8847	1.4352	1.4928e-05	0.00076552	sp|P48591|RIR1_DROME Ribonucleoside-diphosphate reductase large subunit OS=Drosophila melanogaster OX=7227 GN=RnrL PE=1 SV=2//0
FBgn0266719	Unc-13 ortholog 4B (C. elegans)(Unc-13-4B)	1501.04	557.649	1.4285	3.9749e-10	8.9815e-08	sp|Q9VBY8|UN13B_DROME Protein unc-13 homolog 4B OS=Drosophila melanogaster OX=7227 GN=stac PE=1 SV=5//0
FBgn0030929	CG15043 gene product from transcript CG15043-RB(CG15043)	2006	745.472	1.4281	1.1549e-10	2.8949e-08	-//-
FBgn0040212	Dihydroxyacetone phosphate acyltransferase(Dhap-at)	727.174	271.927	1.4191	1.5162e-09	2.8958e-07	sp|A4IF87|GNPAT_BOVIN Dihydroxyacetone phosphate acyltransferase OS=Bos taurus OX=9913 GN=GNPAT PE=2 SV=1//7.95663e-78
FBgn0010383	Cytochrome P450-18a1(Cyp18a1)	805.271	302.846	1.4109	3.3187e-08	4.3641e-06	sp|Q95078|CP18A_DROME Cytochrome P450 18a1 OS=Drosophila melanogaster OX=7227 GN=Cyp18a1 PE=2 SV=2//0
FBgn0261046	Down syndrome cell adhesion molecule 3(Dscam3)	242.177	91.2125	1.4088	3.9996e-08	5.1333e-06	sp|Q9VS29|DSCL_DROME Down syndrome cell adhesion molecule-like protein Dscam2 OS=Drosophila melanogaster OX=7227 GN=Dscam2 PE=2 SV=3//0
FBgn0263321	CG43402 gene product from transcript CG43402-RB(CG43402)	4041.58	1525.47	1.4057	0.0019214	0.035272	-//-
FBgn0001233	Heat shock protein 83(Hsp83)	30543.8	11564.2	1.4012	2.0247e-10	4.9215e-08	sp|P02828|HSP83_DROME Heat shock protein 83 OS=Drosophila melanogaster OX=7227 GN=Hsp83 PE=1 SV=1//0
FBgn0013342	neuronal Synaptobrevin(nSyb)	2843.53	1077.83	1.3995	7.1912e-10	1.4604e-07	sp|P47193|VAMP2_XENLA Vesicle-associated membrane protein 2 OS=Xenopus laevis OX=8355 GN=vamp2 PE=3 SV=3//1.71569e-27
FBgn0037973	CG18547 gene product from transcript CG18547-RA(CG18547)	278.783	105.918	1.3962	7.157e-08	8.2604e-06	sp|O81884|GALDH_ARATH L-galactose dehydrogenase OS=Arabidopsis thaliana OX=3702 GN=LGALDH PE=1 SV=1//6.34968e-66
FBgn0039290	CG13654 gene product from transcript CG13654-RA(CG13654)	182.941	69.8997	1.388	5.073e-07	4.6507e-05	sp|B1AWJ5|TMM8B_MOUSE Transmembrane protein 8B OS=Mus musculus OX=10090 GN=Tmem8b PE=2 SV=1//5.46438e-47
FBgn0264598	Protostome-specific GEF(PsGEF)	817.043	312.725	1.3855	1.2149e-06	9.6757e-05	-//-
FBgn0053517	Dopamine 2-like receptor(Dop2R)	109.933	42.1193	1.3841	8.9863e-05	0.0032543	sp|Q8IS44|DRD2L_DROME Dopamine D2-like receptor OS=Drosophila melanogaster OX=7227 GN=Dop2R PE=2 SV=2//0
FBgn0039064	CG4467 gene product from transcript CG4467-RB(CG4467)	772.567	296.28	1.3827	1.6457e-05	0.00083027	sp|Q6P179|ERAP2_HUMAN Endoplasmic reticulum aminopeptidase 2 OS=Homo sapiens OX=9606 GN=ERAP2 PE=1 SV=2//1.26421e-38
FBgn0037324	Odorant receptor co-receptor(Orco)	90.3344	34.7167	1.3796	8.4868e-06	0.0004744	sp|Q9VNB5|ORCO_DROME Odorant receptor coreceptor OS=Drosophila melanogaster OX=7227 GN=Orco PE=1 SV=2//0
FBgn0051390	Mediator complex subunit 7(MED7)	644.95	248.134	1.3781	1.8598e-08	2.5945e-06	sp|Q9GYV9|MED7_DROME Mediator of RNA polymerase II transcription subunit 7 OS=Drosophila melanogaster OX=7227 GN=MED7 PE=1 SV=1//9.37504e-148
FBgn0013759	CASK ortholog(CASK)	976.062	375.773	1.3771	4.729e-09	8.1578e-07	sp|Q24210|CSKP_DROME Peripheral plasma membrane protein CASK OS=Drosophila melanogaster OX=7227 GN=CASK PE=1 SV=4//0
FBgn0031114	CG1676 gene product from transcript CG1676-RB(cactin)	328.693	126.749	1.3748	6.738e-08	7.8904e-06	sp|Q9VR99|CATIN_DROME Cactin OS=Drosophila melanogaster OX=7227 GN=cactin PE=1 SV=3//0
FBgn0032387	CG16965 gene product from transcript CG16965-RC(CG16965)	263.159	101.657	1.3722	7.5693e-06	0.00043525	sp|Q32M88|PGGHG_HUMAN Protein-glucosylgalactosylhydroxylysine glucosidase OS=Homo sapiens OX=9606 GN=PGGHG PE=1 SV=2//3.35151e-93
FBgn0262483	RIM-binding protein(Rbp)	731.894	283.706	1.3672	8.4333e-06	0.00047306	sp|Q8QFX1|RIMB2_CHICK RIMS-binding protein 2 OS=Gallus gallus OX=9031 GN=RIMBP2 PE=1 SV=1//3.63665e-08
FBgn0053988	Mid1 ortholog (S. cerevisiae)(Mid1)	457.639	177.701	1.3648	1.0505e-05	0.00057323	-//-
FBgn0028983	Serpin 55B(Spn55B)	758.501	294.603	1.3644	4.0846e-09	7.1227e-07	sp|Q7YTY6|SP42D_DROME Serine protease inhibitor 42Dd OS=Drosophila melanogaster OX=7227 GN=Spn42Dd PE=2 SV=1//7.90057e-60
FBgn0041627	CG18801 gene product from transcript CG18801-RA(Ku80)	291.916	113.495	1.3629	1.2306e-07	1.3418e-05	sp|P27641|XRCC5_MOUSE X-ray repair cross-complementing protein 5 OS=Mus musculus OX=10090 GN=Xrcc5 PE=1 SV=4//2.29267e-17
FBgn0005619	Histidine decarboxylase(Hdc)	204.215	79.5573	1.36	6.5698e-06	0.00039292	sp|Q05733|DCHS_DROME Histidine decarboxylase OS=Drosophila melanogaster OX=7227 GN=Hdc PE=2 SV=2//0
FBgn0030600	highwire(hiw)	703.919	274.459	1.3588	1.3302e-07	1.4227e-05	sp|Q9NB71|HIW_DROME E3 ubiquitin-protein ligase highwire OS=Drosophila melanogaster OX=7227 GN=hiw PE=1 SV=2//0
FBgn0003861	transient receptor potential(trp)	4263.79	1664.61	1.357	3.4902e-09	6.2214e-07	sp|P19334|TRP_DROME Transient receptor potential protein OS=Drosophila melanogaster OX=7227 GN=trp PE=1 SV=3//9.06565e-10
FBgn0029689	CG6428 gene product from transcript CG6428-RA(CG6428)	907.522	354.712	1.3553	5.0833e-09	8.5844e-07	sp|Q9U518|ASPG_DIRIM L-asparaginase OS=Dirofilaria immitis OX=6287 PE=1 SV=1//2.14419e-177
FBgn0039816	CG11317 gene product from transcript CG11317-RA(CG11317)	135.689	53.067	1.3544	0.00029908	0.0085066	-//-
FBgn0034515	CG13428 gene product from transcript CG13428-RB(CG13428)	1172.39	458.563	1.3543	1.3823e-06	0.00010654	-//-
FBgn0035246	CG13928 gene product from transcript CG13928-RA(CG13928)	1049.34	411.786	1.3495	1.0375e-08	1.6159e-06	-//-
FBgn0032719	CG17321 gene product from transcript CG17321-RB(CG17321)	162.724	63.9998	1.3463	7.631e-07	6.5467e-05	-//-
FBgn0015019	CG8977 gene product from transcript CG8977-RB(Cctgamma)	1750.22	691.242	1.3403	3.6708e-09	6.4715e-07	sp|P48605|TCPG_DROME T-complex protein 1 subunit gamma OS=Drosophila melanogaster OX=7227 GN=CCT3 PE=2 SV=2//0
FBgn0028862	down and out(dao)	158.411	62.5688	1.3402	2.989e-06	0.00020148	-//-
FBgn0031866	Neuroligin 2(Nlg2)	345.145	136.361	1.3398	1.0297e-07	1.1552e-05	sp|Q8N2Q7|NLGN1_HUMAN Neuroligin-1 OS=Homo sapiens OX=9606 GN=NLGN1 PE=1 SV=2//3.31742e-84
FBgn0053229	CG33229 gene product from transcript CG33229-RB(CG33229)	560.185	221.644	1.3377	0.00016084	0.0052553	-//-
FBgn0040281	APP-like protein interacting protein 1(Aplip1)	334.157	132.861	1.3306	8.1693e-07	6.8618e-05	sp|Q9W0K0|JIP1_DROME JNK-interacting protein 1 OS=Drosophila melanogaster OX=7227 GN=Aplip1 PE=1 SV=2//0
FBgn0035260	CG7991 gene product from transcript CG7991-RB(CG7991)	40.5644	16.1482	1.3288	0.0014373	0.028086	-//-
FBgn0000037	muscarinic Acetylcholine Receptor, A-type(mAChR-A)	236.846	94.4241	1.3267	3.5059e-07	3.368e-05	sp|P16395|ACM1_DROME Muscarinic acetylcholine receptor DM1 OS=Drosophila melanogaster OX=7227 GN=mAChR-A PE=2 SV=2//0
FBgn0085382	CG34353 gene product from transcript CG34353-RB(CG34353)	148.09	59.1313	1.3245	2.8053e-05	0.0012786	sp|Q26474|LACH_SCHAM Lachesin OS=Schistocerca americana OX=7009 GN=LAC PE=1 SV=1//3.26801e-32
FBgn0005664	Crystallin(Crys)	131.702	52.6315	1.3233	0.00068884	0.016302	sp|P80683|CUA3A_TENMO Larval cuticle protein A3A OS=Tenebrio molitor OX=7067 PE=1 SV=1//9.64491e-25
FBgn0024941	Regulator of G-protein signalling 7(RSG7)	232.026	92.8211	1.3218	5.1935e-07	4.7341e-05	sp|P49803|RGS7_RAT Regulator of G-protein signaling 7 OS=Rattus norvegicus OX=10116 GN=Rgs7 PE=1 SV=2//6.22474e-165
FBgn0261244	inactivation no afterpotential E(inaE)	1109.25	444.682	1.3187	1.3277e-06	0.0001034	sp|Q6WQJ1|DGLA_MOUSE Sn1-specific diacylglycerol lipase alpha OS=Mus musculus OX=10090 GN=Dagla PE=1 SV=2//2.01069e-165
FBgn0266750	ncRNA(CR45223)	39.4298	15.8801	1.3121	0.0015428	0.029536	-//-
FBgn0039239	CG13641 gene product from transcript CG13641-RA(CG13641)	118.182	47.8251	1.3052	8.0052e-06	0.00045221	-//-
FBgn0039089	CG10152 gene product from transcript CG10152-RB(beat-IV)	125.481	50.8209	1.304	1.0326e-05	0.00056733	-//-
FBgn0063492	Glutathione S transferase E8(GstE8)	609.621	247.035	1.3032	0.00071173	0.016667	sp|P46430|GSTT1_MANSE Glutathione S-transferase 1 OS=Manduca sexta OX=7130 GN=GST1 PE=2 SV=1//2.04135e-53
FBgn0025726	CG2999 gene product from transcript CG2999-RD(unc-13)	2861.39	1160.4	1.3021	0.00012187	0.00416	sp|Q9UPW8|UN13A_HUMAN Protein unc-13 homolog A OS=Homo sapiens OX=9606 GN=UNC13A PE=2 SV=4//0
FBgn0034326	CG18540 gene product from transcript CG18540-RB(CG18540)	52.753	21.4034	1.3014	0.00071266	0.016667	-//-
FBgn0032484	kekkon4(kek4)	94.6263	38.5751	1.2946	4.5446e-05	0.0019086	sp|A6NDA9|LRIT2_HUMAN Leucine-rich repeat, immunoglobulin-like domain and transmembrane domain-containing protein 2 OS=Homo sapiens OX=9606 GN=LRIT2 PE=2 SV=1//2.71007e-20
FBgn0266311	ncRNA(CR44976)	33.7451	13.773	1.2928	0.0019226	0.035272	sp|Q28EW0|TM87A_XENTR Transmembrane protein 87A OS=Xenopus tropicalis OX=8364 GN=tmem87a PE=2 SV=1//8.16345e-46
FBgn0010397	Lamin C(LamC)	1391.08	570.516	1.2859	1.3055e-08	1.9759e-06	sp|Q03427|LAMC_DROME Lamin-C OS=Drosophila melanogaster OX=7227 GN=LamC PE=1 SV=2//1.14219e-08
FBgn0039617	Dpr-interacting protein gamma(DIP-gamma)	117.163	48.1296	1.2835	1.4002e-05	0.00072936	sp|Q24372|LACH_DROME Lachesin OS=Drosophila melanogaster OX=7227 GN=Lac PE=1 SV=2//5.67618e-28
FBgn0050158	CG30158 gene product from transcript CG30158-RA(CG30158)	198.831	81.8369	1.2807	4.778e-06	0.00030539	sp|Q5R6S2|DIRA2_PONAB GTP-binding protein Di-Ras2 OS=Pongo abelii OX=9601 GN=DIRAS2 PE=2 SV=1//2.57925e-28
FBgn0034978	CG3257 gene product from transcript CG3257-RA(CG3257)	352.707	145.343	1.279	2.2132e-07	2.1659e-05	-//-
FBgn0032587	CG5953 gene product from transcript CG5953-RD(CG5953)	812.603	334.88	1.2789	1.4425e-07	1.5225e-05	-//-
FBgn0040236	CG12132 gene product from transcript CG12132-RB(c11.1)	1524.11	628.762	1.2774	2.1834e-08	2.9939e-06	sp|Q8NDA8|MROH1_HUMAN Maestro heat-like repeat-containing protein family member 1 OS=Homo sapiens OX=9606 GN=MROH1 PE=2 SV=3//1.36128e-99
FBgn0011822	pepsinogen-like(pcl)	44.5055	18.4189	1.2728	0.0010044	0.021805	sp|Q03168|ASPP_AEDAE Lysosomal aspartic protease OS=Aedes aegypti OX=7159 GN=AAEL006169 PE=1 SV=2//4.07056e-94
FBgn0038344	CG5205 gene product from transcript CG5205-RA(CG5205)	520.459	215.844	1.2698	1.804e-07	1.8672e-05	sp|E1BNG3|ASCC3_BOVIN Activating signal cointegrator 1 complex subunit 3 OS=Bos taurus OX=9913 GN=ascc3 PE=3 SV=1//0
FBgn0005612	Sox box protein 14(Sox14)	798.673	331.457	1.2688	4.534e-08	5.6563e-06	sp|P40656|SOX14_DROME Putative transcription factor SOX-14 OS=Drosophila melanogaster OX=7227 GN=Sox14 PE=2 SV=3//0
FBgn0261041	straightjacket(stj)	805	334.939	1.2651	7.5883e-08	8.6957e-06	sp|Q8CFG5|CA2D3_RAT Voltage-dependent calcium channel subunit alpha-2/delta-3 OS=Rattus norvegicus OX=10116 GN=Cacna2d3 PE=1 SV=1//4.54654e-179
FBgn0259246	bruchpilot(brp)	1206.57	503.61	1.2605	4.7603e-08	5.8298e-06	sp|Q6PH08|ERC2_MOUSE ERC protein 2 OS=Mus musculus OX=10090 GN=Erc2 PE=1 SV=2//3.23074e-20
FBgn0001224	Heat shock protein 23(Hsp23)	3984.97	1667.6	1.2568	2.2494e-06	0.00016182	sp|P02516|HSP23_DROME Heat shock protein 23 OS=Drosophila melanogaster OX=7227 GN=Hsp23 PE=2 SV=2//2.66697e-122
FBgn0034076	Juvenile hormone esterase duplication(Jhedup)	133.418	55.8991	1.2551	1.0483e-05	0.00057323	sp|P08171|EST6_DROME Esterase-6 OS=Drosophila melanogaster OX=7227 GN=Est-6 PE=1 SV=2//4.30015e-71
FBgn0025628	CG4199 gene product from transcript CG4199-RG(CG4199)	3917.5	1641.38	1.255	1.7328e-08	2.5044e-06	sp|Q3TY86|AIFM3_MOUSE Apoptosis-inducing factor 3 OS=Mus musculus OX=10090 GN=Aifm3 PE=1 SV=1//1.11937e-111
FBgn0002641	maroon-like(mal)	491.915	206.11	1.255	1.9469e-07	1.9644e-05	sp|Q9VRA2|MOCOS_DROME Molybdenum cofactor sulfurase OS=Drosophila melanogaster OX=7227 GN=mal PE=1 SV=1//0
FBgn0263601	mind bomb 1(mib1)	1273.78	534.117	1.2539	6.636e-08	7.828e-06	sp|Q9VUX2|MIB_DROME E3 ubiquitin-protein ligase mind-bomb OS=Drosophila melanogaster OX=7227 GN=mib1 PE=1 SV=3//0
FBgn0052091	CG32091 gene product from transcript CG32091-RB(CG32091)	529.87	222.422	1.2523	1.7332e-07	1.8055e-05	sp|Q64343|ABCG1_MOUSE ATP-binding cassette sub-family G member 1 OS=Mus musculus OX=10090 GN=Abcg1 PE=1 SV=1//7.2265e-99
FBgn0034318	CG14500 gene product from transcript CG14500-RA(CG14500)	333.86	140.192	1.2518	7.3107e-06	0.00042495	sp|Q59DY6|LEDL2_DROME C-type lectin 37Da OS=Drosophila melanogaster OX=7227 GN=lectin-37Da PE=2 SV=1//4.20657e-09
FBgn0259716	CG42370 gene product from transcript CG42370-RA(CG42370)	548.514	231.763	1.2429	5.3699e-05	0.002143	sp|Q8T062|NEP4_DROME Neprilysin-4 OS=Drosophila melanogaster OX=7227 GN=Nep4 PE=1 SV=1//9.79507e-21
FBgn0027079	Valyl-tRNA synthetase(Aats-val)	821.517	347.448	1.2415	1.1677e-07	1.3009e-05	sp|P49696|SYVC_TAKRU Valine--tRNA ligase OS=Takifugu rubripes OX=31033 GN=vars PE=3 SV=1//0
FBgn0036290	CG10638 gene product from transcript CG10638-RD(CG10638)	757.611	320.447	1.2414	1.216e-07	1.3362e-05	sp|P82125|AKCL2_PIG 1,5-anhydro-D-fructose reductase OS=Sus scrofa OX=9823 GN=AKR1E2 PE=1 SV=2//1.37685e-86
FBgn0266275	ncRNA(CR44960)	50.5723	21.4116	1.24	0.00079858	0.018172	sp|P08011|MGST1_RAT Microsomal glutathione S-transferase 1 OS=Rattus norvegicus OX=10116 GN=Mgst1 PE=1 SV=3//6.1937e-11
FBgn0011774	Inverted repeat-binding protein(Irbp)	350.122	148.282	1.2395	6.3568e-07	5.6657e-05	sp|Q23976|KU70_DROME ATP-dependent DNA helicase 2 subunit 1 OS=Drosophila melanogaster OX=7227 GN=Irbp PE=2 SV=3//0
FBgn0040837	CG8620 gene product from transcript CG8620-RA(CG8620)	963.618	408.245	1.239	0.0019135	0.035246	-//-
FBgn0037521	CG2993 gene product from transcript CG2993-RB(CG2993)	591.714	251.21	1.236	0.0006122	0.014995	sp|O45782|ARD17_CAEEL Arrestin domain-containing protein 17 OS=Caenorhabditis elegans OX=6239 GN=arrd-17 PE=1 SV=2//2.66081e-22
FBgn0003249	Rhodopsin 3(Rh3)	1462.07	620.733	1.236	1.8524e-07	1.9001e-05	sp|P04950|OPS3_DROME Opsin Rh3 OS=Drosophila melanogaster OX=7227 GN=Rh3 PE=1 SV=1//0
FBgn0030040	CG15347 gene product from transcript CG15347-RA(CG15347)	2203.26	935.945	1.2351	3.0848e-08	4.09e-06	-//-
FBgn0286075	DNA ligase 3 (DNAlig3)	416.545	176.995	1.2348	3.3192e-07	3.2078e-05	sp|P49916|DNLI3_HUMAN DNA ligase 3 OS=Homo sapiens OX=9606 GN=LIG3 PE=1 SV=2//0
FBgn0016076	vrille(vri)	2266.63	963.644	1.234	5.4431e-07	4.9336e-05	sp|O08750|NFIL3_MOUSE Nuclear factor interleukin-3-regulated protein OS=Mus musculus OX=10090 GN=Nfil3 PE=1 SV=1//6.6684e-19
FBgn0031267	CG13688 gene product from transcript CG13688-RA(Ipk2)	209.755	89.3235	1.2316	5.7534e-06	0.00035365	sp|Q7TT16|IPMK_MOUSE Inositol polyphosphate multikinase OS=Mus musculus OX=10090 GN=Ipmk PE=1 SV=1//3.01525e-29
FBgn0267408	Aldehyde oxidase 1(AOX1)	6048.49	2575.86	1.2315	3.8665e-08	5.0024e-06	sp|Q7G192|ALDO2_ARATH Indole-3-acetaldehyde oxidase OS=Arabidopsis thaliana OX=3702 GN=AAO2 PE=1 SV=2//8.3657e-162
FBgn0004618	glass(gl)	116.822	49.9137	1.2268	5.2174e-05	0.0020874	sp|P13360|GLAS_DROME Protein glass OS=Drosophila melanogaster OX=7227 GN=gl PE=1 SV=2//0
FBgn0261671	CG42555 gene product from transcript CG42555-RJ(tweek)	1418.68	608.441	1.2214	1.2159e-07	1.3362e-05	sp|A2AAE1|K1109_MOUSE Transmembrane protein KIAA1109 OS=Mus musculus OX=10090 GN=Kiaa1109 PE=1 SV=4//3.82337e-08
FBgn0264979	CG4267 gene product from transcript CG4267-RB(CG4267)	1175.5	504.295	1.2209	1.3833e-05	0.00072287	sp|P81139|LIPR2_CAVPO Pancreatic lipase-related protein 2 OS=Cavia porcellus OX=10141 GN=PNLIPRP2 PE=1 SV=1//5.75944e-33
FBgn0028704	CG18660 gene product from transcript CG18660-RF(Nckx30C)	1544.98	663.094	1.2203	0.00028979	0.0083467	sp|Q9U6A0|NCKX_DROME Sodium/potassium/calcium exchanger Nckx30C OS=Drosophila melanogaster OX=7227 GN=Nckx30C PE=2 SV=4//0
FBgn0259896	Nimrod C1(NimC1)	864.485	371.239	1.2195	0.00020167	0.0062884	sp|Q8N2E2|VWDE_HUMAN von Willebrand factor D and EGF domain-containing protein OS=Homo sapiens OX=9606 GN=VWDE PE=2 SV=4//6.79888e-08
FBgn0263131	CG43373 gene product from transcript CG43373-RB(CG43373)	140.767	60.4777	1.2188	1.3569e-05	0.00071246	sp|O95622|ADCY5_HUMAN Adenylate cyclase type 5 OS=Homo sapiens OX=9606 GN=ADCY5 PE=1 SV=3//1.00942e-14
FBgn0038638	CG7702 gene product from transcript CG7702-RA(CG7702)	287.331	123.696	1.2159	1.5964e-06	0.00012024	sp|P35858|ALS_HUMAN Insulin-like growth factor-binding protein complex acid labile subunit OS=Homo sapiens OX=9606 GN=IGFALS PE=1 SV=1//4.42375e-09
FBgn0035267	CG13921 gene product from transcript CG13921-RF(CG13921)	130.163	56.1021	1.2142	3.3764e-05	0.0014922	-//-
FBgn0031881	CG3476 gene product from transcript CG3476-RA(CG3476)	749.964	324.059	1.2106	2.1231e-07	2.1156e-05	sp|Q9VM51|MME1_DROME Mitochondrial magnesium exporter 1 OS=Drosophila melanogaster OX=7227 GN=MME1 PE=2 SV=1//0
FBgn0039685	Odorant-binding protein 99b(Obp99b)	5874.05	2541.52	1.2087	0.00088199	0.019707	sp|Q9VAI6|OB99B_DROME General odorant-binding protein 99b OS=Drosophila melanogaster OX=7227 GN=Obp99b PE=2 SV=1//5.0603e-89
FBgn0033127	Tetraspanin 42Ef(Tsp42Ef)	1904.27	823.964	1.2086	2.7003e-06	0.00018593	sp|Q24188|LBM_DROME Protein late bloomer OS=Drosophila melanogaster OX=7227 GN=lbm PE=2 SV=1//1.46548e-10
FBgn0000633	faint sausage(fas)	217.138	94.029	1.2074	5.0136e-05	0.0020391	sp|Q8N3J6|CADM2_HUMAN Cell adhesion molecule 2 OS=Homo sapiens OX=9606 GN=CADM2 PE=2 SV=1//1.07281e-09
FBgn0020388	Gcn5 ortholog(Gcn5)	1095.7	474.951	1.206	1.8595e-07	1.9001e-05	sp|A0A0R4IXF6|KAT2A_DANRE Histone acetyltransferase KAT2A OS=Danio rerio OX=7955 GN=kat2a PE=2 SV=1//0
FBgn0029864	CG15894 gene product from transcript CG15894-RB(CG15894)	190.484	82.6935	1.2038	6.1734e-05	0.0023694	-//-
FBgn0015038	Cytochrome P450-9b1(Cyp9b1)	417.189	181.878	1.1977	6.3977e-07	5.6706e-05	sp|Q9V4I0|CP9B1_DROME Cytochrome P450 9b1 OS=Drosophila melanogaster OX=7227 GN=Cyp9b1 PE=2 SV=1//0
FBgn0086708	starvin(stv)	2198.44	958.49	1.1976	8.6575e-08	9.7811e-06	sp|Q9BLJ6|BAGS_BOMMO BAG domain-containing protein Samui OS=Bombyx mori OX=7091 GN=Samui PE=2 SV=1//5.57342e-21
FBgn0028940	CG8864 gene product from transcript CG8864-RA(Cyp28a5)	1430.69	624.375	1.1962	1.3299e-07	1.4227e-05	sp|Q9V419|C28A5_DROME Probable cytochrome P450 28a5 OS=Drosophila melanogaster OX=7227 GN=Cyp28a5 PE=2 SV=1//0
FBgn0032935	Autophagy-related 18b(Atg18b)	915.181	399.436	1.1961	2.2141e-07	2.1659e-05	sp|Q5ZHN3|WIPI2_CHICK WD repeat domain phosphoinositide-interacting protein 2 OS=Gallus gallus OX=9031 GN=WIPI2 PE=2 SV=1//2.60354e-109
FBgn0285944	paralytic (para)	1081.64	472.386	1.1952	0.00090472	0.020048	sp|P35500|SCNA_DROME Sodium channel protein para OS=Drosophila melanogaster OX=7227 GN=para PE=2 SV=3//0
FBgn0035914	CG6282 gene product from transcript CG6282-RC(CG6282)	264.227	115.574	1.193	2.3004e-06	0.00016475	-//-
FBgn0262730	CG14446 gene product from transcript CG14446-RC(CG14446)	608.048	266.105	1.1922	5.6434e-05	0.0022028	sp|Q8N3T6|T132C_HUMAN Transmembrane protein 132C OS=Homo sapiens OX=9606 GN=TMEM132C PE=2 SV=3//2.18524e-58
FBgn0053547	Rab3 interacting molecule(Rim)	763.022	334.367	1.1903	4.853e-07	4.5004e-05	sp|Q86UR5|RIMS1_HUMAN Regulating synaptic membrane exocytosis protein 1 OS=Homo sapiens OX=9606 GN=RIMS1 PE=1 SV=1//2.3216e-16
FBgn0030808	Rho GTPase activating protein at 15B(RhoGAP15B)	714.893	313.676	1.1885	3.7315e-07	3.5423e-05	sp|Q8BZ05|ARAP2_MOUSE Arf-GAP with Rho-GAP domain, ANK repeat and PH domain-containing protein 2 OS=Mus musculus OX=10090 GN=Arap2 PE=1 SV=2//3.36429e-37
FBgn0038975	Neurexin 1(Nrx-1)	1114.32	489.883	1.1857	1.2266e-05	0.00064944	sp|Q9ULB1|NRX1A_HUMAN Neurexin-1 OS=Homo sapiens OX=9606 GN=NRXN1 PE=2 SV=1//0
FBgn0034389	Multiple C2 domain and transmembrane region protein(Mctp)	603.001	265.303	1.1845	7.0037e-07	6.0736e-05	sp|A1ZBD6|MCTP_DROME Multiple C2 and transmembrane domain-containing protein OS=Drosophila melanogaster OX=7227 GN=Mctp PE=1 SV=3//0
FBgn0041723	rhomboid-5(rho-5)	267.784	118.064	1.1815	6.5984e-06	0.00039292	sp|Q76NQ1|RHDF1_DROME Inactive rhomboid protein 1 OS=Drosophila melanogaster OX=7227 GN=rho-5 PE=2 SV=1//0
FBgn0267035	ncRNA(CR45479)	78.6293	34.6939	1.1804	0.00041105	0.011028	sp|O46051|C4D14_DROME Probable cytochrome P450 4d14 OS=Drosophila melanogaster OX=7227 GN=Cyp4d14 PE=3 SV=1//0
FBgn0051191	CG31191 gene product from transcript CG31191-RA(CG31191)	66.4396	29.3837	1.177	0.0022713	0.039954	-//-
FBgn0033153	CG11086 gene product from transcript CG11086-RA(Gadd45)	466.522	206.704	1.1744	1.1863e-06	9.5162e-05	sp|Q9WTQ7|GA45G_RAT Growth arrest and DNA damage-inducible protein GADD45 gamma OS=Rattus norvegicus OX=10116 GN=Gadd45g PE=2 SV=1//4.4043e-10
FBgn0035770	pastrel(pst)	7748.03	3433.42	1.1742	1.2379e-07	1.3418e-05	-//-
FBgn0029974	defective proboscis extension response 14(dpr14)	206.726	91.6929	1.1728	0.00054159	0.013705	sp|Q98919|LSAMP_CHICK Limbic system-associated membrane protein OS=Gallus gallus OX=9031 PE=2 SV=1//1.27513e-10
FBgn0031580	CG15423 gene product from transcript CG15423-RA(CG15423)	606.185	269.843	1.1676	4.9944e-07	4.6049e-05	-//-
FBgn0266347	nicotinic Acetylcholine Receptor alpha4(nAChRalpha4)	466.905	208.394	1.1638	0.00014443	0.0048073	sp|P09478|ACH1_DROME Acetylcholine receptor subunit alpha-like 1 OS=Drosophila melanogaster OX=7227 GN=nAChRalpha1 PE=2 SV=2//0
FBgn0010240	Ligand-gated chloride channel homolog 3(Lcch3)	129.662	57.9055	1.163	4.2104e-05	0.0018061	sp|Q08832|GBRB3_DROME Gamma-aminobutyric acid receptor subunit beta-like OS=Drosophila melanogaster OX=7227 GN=Lcch3 PE=1 SV=2//0
FBgn0004118	nicotinic Acetylcholine Receptor beta2(nAChRbeta2)	210.042	93.9367	1.1609	1.9147e-05	0.00094224	sp|P25162|ACH4_DROME Acetylcholine receptor subunit beta-like 2 OS=Drosophila melanogaster OX=7227 GN=nAChRbeta2 PE=2 SV=3//3.5907e-132
FBgn0263353	CG11000 gene product from transcript CG11000-RC(CG11000)	433.151	194.716	1.1535	1.2665e-06	9.9599e-05	-//-
FBgn0085399	CG34370 gene product from transcript CG34370-RG(CG34370)	185.686	83.5056	1.1529	2.67e-05	0.0012345	sp|Q9DER7|TLL1_CHICK Tolloid-like protein 1 OS=Gallus gallus OX=9031 GN=TLL1 PE=2 SV=1//7.93492e-06
FBgn0263864	Death-associated APAF1-related killer(Dark)	502.113	225.997	1.1517	1.9383e-06	0.0001433	sp|Q9I9H8|APAF_DANRE Apoptotic protease-activating factor 1 OS=Danio rerio OX=7955 GN=apaf1 PE=2 SV=1//3.62994e-09
FBgn0038865	Common Dpr-interacting protein(cDIP)	1166.82	525.379	1.1512	4.1744e-07	3.8936e-05	sp|Q7Z2Q7|LRR70_HUMAN Leucine-rich repeat-containing protein 70 OS=Homo sapiens OX=9606 GN=LRRC70 PE=2 SV=1//1.40898e-07
FBgn0043362	blue cheese(bchs)	806.803	363.579	1.1499	1.2183e-06	9.6757e-05	sp|Q8IZQ1|WDFY3_HUMAN WD repeat and FYVE domain-containing protein 3 OS=Homo sapiens OX=9606 GN=WDFY3 PE=1 SV=2//1.89428e-57
FBgn0033932	Diuretic hormone 44 receptor 1(Dh44-R1)	66.2095	29.841	1.1497	0.00088661	0.019755	sp|Q16983|DIHR_ACHDO Diuretic hormone receptor OS=Acheta domesticus OX=6997 PE=2 SV=1//5.21786e-109
FBgn0024232	CG18471 gene product from transcript CG18471-RE(gprs)	253.363	114.232	1.1492	0.00032857	0.0091515	sp|O61366|GPRS_DROME Serine-enriched protein OS=Drosophila melanogaster OX=7227 GN=gprs PE=4 SV=3//0
FBgn0005558	eyeless(ey)	122.882	55.4714	1.1475	7.6873e-05	0.0028614	sp|O18381|PAX6_DROME Paired box protein Pax-6 OS=Drosophila melanogaster OX=7227 GN=ey PE=1 SV=3//0
FBgn0000039	nicotinic Acetylcholine Receptor alpha2(nAChRalpha2)	138.089	62.4129	1.1457	6.6702e-05	0.002527	sp|P17644|ACH2_DROME Acetylcholine receptor subunit alpha-like 2 OS=Drosophila melanogaster OX=7227 GN=nAChRalpha2 PE=2 SV=1//0
FBgn0015589	APC-like(Apc)	868.016	394.099	1.1392	8.3768e-07	6.9632e-05	sp|P70478|APC_RAT Adenomatous polyposis coli protein OS=Rattus norvegicus OX=10116 GN=Apc PE=1 SV=1//1.68847e-142
FBgn0001225	Heat shock protein 26(Hsp26)	3818.45	1734.61	1.1384	2.6553e-07	2.5818e-05	sp|P02517|HSP26_DROME Heat shock protein 26 OS=Drosophila melanogaster OX=7227 GN=Hsp26 PE=1 SV=2//1.63143e-137
FBgn0259927	CG42450 gene product from transcript CG42450-RB(CG42450)	613.791	279.085	1.137	9.7256e-06	0.00053618	sp|O46470|RGS7_BOVIN Regulator of G-protein signaling 7 OS=Bos taurus OX=9913 GN=RGS7 PE=1 SV=1//1.69566e-112
FBgn0036320	CG10943 gene product from transcript CG10943-RA(CG10943)	940.803	427.964	1.1364	0.0010982	0.023212	-//-
FBgn0038156	CG14372 gene product from transcript CG14372-RD(CG14372)	194.284	88.4805	1.1347	1.1122e-05	0.00060485	sp|Q96RW7|HMCN1_HUMAN Hemicentin-1 OS=Homo sapiens OX=9606 GN=HMCN1 PE=1 SV=2//9.21483e-06
FBgn0031799	CG9493 gene product from transcript CG9493-RB(Pez)	382.52	174.315	1.1338	3.8196e-06	0.00025011	sp|Q62136|PTN21_MOUSE Tyrosine-protein phosphatase non-receptor type 21 OS=Mus musculus OX=10090 GN=Ptpn21 PE=1 SV=1//1.55434e-44
FBgn0265413	CG44325 gene product from transcript CG44325-RD(CG44325)	2426.03	1106.34	1.1328	1.7294e-06	0.00012965	-//-
FBgn0053969	CG33969 gene product from transcript CG33969-RC(CG33969)	574.485	262.046	1.1324	1.0311e-06	8.3966e-05	sp|Q9JMJ2|FBXW4_MOUSE F-box/WD repeat-containing protein 4 OS=Mus musculus OX=10090 GN=Fbxw4 PE=1 SV=1//2.13834e-09
FBgn0015037	Cytochrome P450-4p1(Cyp4p1)	2360.82	1078.41	1.1304	3.6866e-07	3.5205e-05	sp|Q9V558|CP4P1_DROME Cytochrome P450 4p1 OS=Drosophila melanogaster OX=7227 GN=Cyp4p1 PE=2 SV=1//0
FBgn0261574	kugelei(kug)	624.103	285.166	1.13	2.4818e-06	0.00017387	sp|Q9VW71|FAT2_DROME Fat-like cadherin-related tumor suppressor homolog OS=Drosophila melanogaster OX=7227 GN=kug PE=2 SV=3//0
FBgn0028645	beaten path Ib(beat-Ib)	73.1643	33.4678	1.1284	0.0013767	0.027301	-//-
FBgn0039543	CG12428 gene product from transcript CG12428-RB(CG12428)	2397.78	1097	1.1281	1.2733e-05	0.00067198	sp|O19094|OCTC_BOVIN Peroxisomal carnitine O-octanoyltransferase OS=Bos taurus OX=9913 GN=CROT PE=1 SV=1//2.89966e-110
FBgn0053202	defective proboscis extension response 11(dpr11)	166.419	76.3892	1.1234	0.00027774	0.0080575	sp|G5ED00|ZIG8_CAEEL Zwei Ig domain protein zig-8 OS=Caenorhabditis elegans OX=6239 GN=zig-8 PE=2 SV=1//1.54985e-07
FBgn0037515	Serine protease 7(Sp7)	1118.12	513.556	1.1225	5.5627e-07	5.0136e-05	sp|Q9V3Z2|SER7_DROME Serine protease 7 OS=Drosophila melanogaster OX=7227 GN=Sp7 PE=1 SV=1//0
FBgn0037896	CG6728 gene product from transcript CG6728-RB(ninaG)	67.142	30.9	1.1196	0.0010751	0.022906	sp|Q9VGP2|NINAG_DROME Neither inactivation nor afterpotential protein G OS=Drosophila melanogaster OX=7227 GN=ninaG PE=2 SV=2//0
FBgn0031959	spatzle 3(spz3)	87.002	40.0889	1.1178	0.00029109	0.0083691	sp|Q9VLV7|SPZ3_DROME Protein spaetzle 3 OS=Drosophila melanogaster OX=7227 GN=spz3 PE=2 SV=2//0
FBgn0010909	misshapen(msn)	1845.75	851.007	1.117	7.8014e-07	6.6574e-05	sp|Q23356|MIG15_CAEEL Serine/threonine-protein kinase mig-15 OS=Caenorhabditis elegans OX=6239 GN=mig-15 PE=2 SV=3//2.13552e-150
FBgn0035253	CG7971 gene product from transcript CG7971-RC(CG7971)	2050.77	947.732	1.1136	2.5012e-06	0.00017446	sp|Q9UQ35|SRRM2_HUMAN Serine/arginine repetitive matrix protein 2 OS=Homo sapiens OX=9606 GN=SRRM2 PE=1 SV=2//8.43241e-21
FBgn0038854	CG7044 gene product from transcript CG7044-RA(CG7044)	397.762	183.876	1.1132	4.0773e-06	0.00026483	-//-
FBgn0037350	CG2911 gene product from transcript CG2911-RB(CG2911)	206.615	95.5986	1.1119	9.7413e-05	0.0034884	sp|Q54CI5|DPH4_DICDI DPH4 homolog OS=Dictyostelium discoideum OX=44689 GN=dph4 PE=3 SV=1//3.75878e-10
FBgn0027363	Signal transducing adaptor molecule(Stam)	1739.44	805.33	1.111	8.8054e-07	7.2817e-05	sp|Q92783|STAM1_HUMAN Signal transducing adapter molecule 1 OS=Homo sapiens OX=9606 GN=STAM PE=1 SV=3//6.71488e-109
FBgn0000038	nicotinic Acetylcholine Receptor beta1(nAChRbeta1)	1041.59	482.813	1.1092	0.0007737	0.017742	sp|P04755|ACH3_DROME Acetylcholine receptor subunit beta-like 1 OS=Drosophila melanogaster OX=7227 GN=nAChRbeta1 PE=2 SV=1//0
FBgn0030073	CG10962 gene product from transcript CG10962-RB(CG10962)	174.876	81.095	1.1086	3.2301e-05	0.0014395	sp|D2WKD9|SDR1_AEDAE Farnesol dehydrogenase OS=Aedes aegypti OX=7159 GN=SDR-1 PE=1 SV=2//9.59456e-54
FBgn0086704	slow termination of phototransduction(stops)	367.655	170.527	1.1083	1.1395e-05	0.00061759	sp|P20595|GCYB1_RAT Guanylate cyclase soluble subunit beta-1 OS=Rattus norvegicus OX=10116 GN=Gucy1b1 PE=1 SV=2//1.50879e-19
FBgn0052369	CG32369 gene product from transcript CG32369-RC(CG32369)	752.149	349.001	1.1078	1.388e-06	0.00010654	sp|Q8HXH0|LONF3_MACFA LON peptidase N-terminal domain and RING finger protein 3 OS=Macaca fascicularis OX=9541 GN=LONRF3 PE=2 SV=1//3.45522e-65
FBgn0001263	inactivation no afterpotential D(inaD)	1206.86	560.059	1.1076	2.3698e-06	0.00016822	sp|Q24008|INAD_DROME Inactivation-no-after-potential D protein OS=Drosophila melanogaster OX=7227 GN=inaD PE=1 SV=2//0
FBgn0039488	CG6066 gene product from transcript CG6066-RA(CG6066)	149.242	69.2631	1.1075	5.1977e-05	0.0020874	sp|Q9VB74|NKAP_DROME NKAP family protein CG6066 OS=Drosophila melanogaster OX=7227 GN=CG6066 PE=1 SV=1//1.55445e-61
FBgn0003396	schnurri(shn)	705.245	327.513	1.1066	2.757e-06	0.00018832	sp|P31629|ZEP2_HUMAN Transcription factor HIVEP2 OS=Homo sapiens OX=9606 GN=HIVEP2 PE=1 SV=2//1.57271e-11
FBgn0037153	CG12673 gene product from transcript CG12673-RC(olf413)	185.932	86.4871	1.1042	0.00027342	0.0079753	sp|Q6NP60|MOX12_DROME MOXD1 homolog 2 OS=Drosophila melanogaster OX=7227 GN=olf413 PE=2 SV=1//0
FBgn0267758	ncRNA(CR46089)	70.5025	32.8129	1.1034	0.0014283	0.027978	sp|Q9VCR7|CTNS_DROME Cystinosin homolog OS=Drosophila melanogaster OX=7227 GN=CG17119 PE=1 SV=2//1.09827e-38
FBgn0086346	ALG-2 interacting protein X(ALiX)	3526.46	1644.26	1.1008	6.9087e-07	6.0566e-05	sp|Q9QZA2|PDC6I_RAT Programmed cell death 6-interacting protein OS=Rattus norvegicus OX=10116 GN=Pdcd6ip PE=1 SV=2//6.07442e-179
FBgn0038721	CG16718 gene product from transcript CG16718-RA(subdued)	903.635	421.495	1.1002	2.3158e-06	0.00016512	sp|Q8BHY3|ANO1_MOUSE Anoctamin-1 OS=Mus musculus OX=10090 GN=Ano1 PE=1 SV=2//0
FBgn0000017	Abl tyrosine kinase(Abl)	943.766	440.585	1.099	1.4874e-06	0.00011309	sp|P00522|ABL_DROME Tyrosine-protein kinase Abl OS=Drosophila melanogaster OX=7227 GN=Abl PE=1 SV=3//0
FBgn0037801	CG3999 gene product from transcript CG3999-RA(CG3999)	238.651	111.409	1.099	1.4087e-05	0.00073141	sp|Q91W43|GCSP_MOUSE Glycine dehydrogenase (decarboxylating), mitochondrial OS=Mus musculus OX=10090 GN=Gldc PE=1 SV=1//0
FBgn0015371	charlatan(chn)	744.221	347.462	1.0989	2.1463e-06	0.00015581	sp|Q7YU81|CHN_DROME Protein charlatan OS=Drosophila melanogaster OX=7227 GN=chn PE=2 SV=3//0
FBgn0052183	CG32183 gene product from transcript CG32183-RB(Ccn)	121.421	56.7184	1.0981	0.00019034	0.0059875	sp|P29279|CTGF_HUMAN Connective tissue growth factor OS=Homo sapiens OX=9606 GN=CTGF PE=1 SV=2//1.39922e-18
FBgn0250910	Octopamine beta3 receptor(Octbeta3R)	116.476	54.4265	1.0977	0.00014561	0.0048264	sp|Q4LBB6|OCTB3_DROME Octopamine receptor beta-3R OS=Drosophila melanogaster OX=7227 GN=Octbeta3R PE=2 SV=4//0
FBgn0259711	CG42365 gene product from transcript CG42365-RA(CG42365)	270.84	126.617	1.097	1.1871e-05	0.00063696	-//-
FBgn0052529	Histone gene-specific Epigenetic Repressor in late S phase(Hers)	1087.96	509.981	1.0931	1.759e-06	0.00013125	sp|Q497V6|BAHD1_MOUSE Bromo adjacent homology domain-containing 1 protein OS=Mus musculus OX=10090 GN=Bahd1 PE=1 SV=1//6.54913e-44
FBgn0033439	CG1773 gene product from transcript CG1773-RA(CG1773)	119.663	56.1395	1.0919	0.00010705	0.0037661	sp|Q9VB68|GRASS_DROME Serine protease grass OS=Drosophila melanogaster OX=7227 GN=grass PE=1 SV=1//1.36314e-42
FBgn0083950	CG34114 gene product from transcript CG34114-RB(CG34114)	258.115	121.284	1.0896	0.0018981	0.035083	sp|B1Q236|SYG1_CAEEL Synaptogenesis protein syg-1 OS=Caenorhabditis elegans OX=6239 GN=syg-1 PE=1 SV=1//1.00632e-19
FBgn0260429	CG42524 gene product from transcript CG42524-RC(CG42524)	95.1272	44.7859	1.0868	0.00029958	0.0085066	-//-
FBgn0050115	Guanine nucleotide exchange factor in mesoderm(GEFmeso)	579.109	273.347	1.0831	5.3366e-06	0.00033184	sp|Q9ULL1|PKHG1_HUMAN Pleckstrin homology domain-containing family G member 1 OS=Homo sapiens OX=9606 GN=PLEKHG1 PE=1 SV=2//9.35955e-61
FBgn0014018	Relish(Rel)	2874.35	1361.11	1.0785	2.3975e-06	0.00016944	sp|Q94527|NFKB1_DROME Nuclear factor NF-kappa-B p110 subunit OS=Drosophila melanogaster OX=7227 GN=Rel PE=1 SV=1//0
FBgn0028879	CG15270 gene product from transcript CG15270-RC(CG15270)	259.464	123.024	1.0766	2.9054e-05	0.0013204	sp|Q4V8U5|ANO10_DANRE Anoctamin-10 OS=Danio rerio OX=7955 GN=ano10 PE=2 SV=1//2.27866e-103
FBgn0263997	CG43740 gene product from transcript CG43740-RA(CG43740)	132.731	63.1408	1.0719	0.0018539	0.034538	-//-
FBgn0028841	juvenile hormone acid methyltransferase(jhamt)	301.415	143.529	1.0704	0.0012645	0.025582	sp|Q9VJK8|JHAMT_DROME Juvenile hormone acid O-methyltransferase OS=Drosophila melanogaster OX=7227 GN=jhamt PE=1 SV=2//0
FBgn0030174	CG15312 gene product from transcript CG15312-RE(CG15312)	219.108	104.35	1.0702	0.001142	0.023609	-//-
FBgn0039886	CG2003 gene product from transcript CG2003-RA(CG2003)	412.326	196.42	1.0698	5.5306e-05	0.00218	sp|O61369|PICO_DROAN Putative inorganic phosphate cotransporter OS=Drosophila ananassae OX=7217 GN=Picot PE=3 SV=1//1.48903e-51
FBgn0002524	CG4162 gene product from transcript CG4162-RA(lace)	866.746	413.278	1.0685	3.1881e-06	0.00021135	sp|P97363|SPTC2_MOUSE Serine palmitoyltransferase 2 OS=Mus musculus OX=10090 GN=Sptlc2 PE=1 SV=2//0
FBgn0259714	Dpr-interacting protein epsilon(DIP-epsilon)	179.758	85.8565	1.0661	8.3002e-05	0.0030402	sp|Q99PJ0|NTRI_MOUSE Neurotrimin OS=Mus musculus OX=10090 GN=Ntm PE=1 SV=2//2.12609e-34
FBgn0002891	mutagen-sensitive 205(mus205)	180.682	86.3181	1.0657	6.6212e-05	0.0025172	sp|Q61493|REV3L_MOUSE DNA polymerase zeta catalytic subunit OS=Mus musculus OX=10090 GN=Rev3l PE=1 SV=3//4.69723e-60
FBgn0039862	CG1804 gene product from transcript CG1804-RA(kek6)	169.598	81.0606	1.065	0.00018517	0.0058708	sp|Q50LG9|LRC24_HUMAN Leucine-rich repeat-containing protein 24 OS=Homo sapiens OX=9606 GN=LRRC24 PE=2 SV=2//1.63564e-24
FBgn0030358	CG10362 gene product from transcript CG10362-RA(CG10362)	147.943	70.7189	1.0649	0.00022971	0.0069384	sp|Q8NEN9|PDZD8_HUMAN PDZ domain-containing protein 8 OS=Homo sapiens OX=9606 GN=PDZD8 PE=1 SV=1//1.84537e-17
FBgn0033051	Ser/Thr-rich caspase(Strica)	171.147	81.8936	1.0634	5.8899e-05	0.0022769	sp|P89116|CASP1_SPOFR Caspase-1 OS=Spodoptera frugiperda OX=7108 PE=1 SV=1//4.75418e-21
FBgn0259241	CG42339 gene product from transcript CG42339-RB(CG42339)	89.3611	42.8665	1.0598	0.00085621	0.019265	sp|Q8IVN8|SBSPO_HUMAN Somatomedin-B and thrombospondin type-1 domain-containing protein OS=Homo sapiens OX=9606 GN=SBSPON PE=1 SV=2//6.90359e-16
FBgn0030261	CG15203 gene product from transcript CG15203-RB(CG15203)	875.68	420.316	1.0589	4.1345e-06	0.00026746	-//-
FBgn0035948	CG5644 gene product from transcript CG5644-RA(CG5644)	134.968	64.7937	1.0587	0.00016948	0.0054831	-//-
FBgn0030855	CG5800 gene product from transcript CG5800-RA(CG5800)	283.409	136.074	1.0585	1.9709e-05	0.00096697	sp|Q80Y44|DDX10_MOUSE Probable ATP-dependent RNA helicase DDX10 OS=Mus musculus OX=10090 GN=Ddx10 PE=1 SV=2//0
FBgn0261976	CG18013 gene product from transcript CG18013-RC(Psf2)	582.548	280.141	1.0562	5.7158e-06	0.00035365	sp|Q9VQY9|PSF2_DROME Probable DNA replication complex GINS protein PSF2 OS=Drosophila melanogaster OX=7227 GN=Psf2 PE=1 SV=1//1.04743e-131
FBgn0010114	hikaru genki(hig)	1565.43	752.897	1.056	9.4095e-05	0.0033847	sp|Q09101|HIG_DROME Locomotion-related protein Hikaru genki OS=Drosophila melanogaster OX=7227 GN=hig PE=1 SV=2//9.20491e-10
FBgn0037533	CD98 heavy chain(CD98hc)	2860.52	1376.13	1.0557	2.1427e-06	0.00015581	sp|Q7YQK3|4F2_RABIT 4F2 cell-surface antigen heavy chain OS=Oryctolagus cuniculus OX=9986 GN=SLC3A2 PE=1 SV=2//5.28281e-17
FBgn0261938	mitochondrial RNA polymerase(mtRNApol)	605.934	291.908	1.0536	6.7846e-06	0.00040149	sp|O00411|RPOM_HUMAN DNA-directed RNA polymerase, mitochondrial OS=Homo sapiens OX=9606 GN=POLRMT PE=1 SV=2//0
FBgn0262109	ncRNA(CR42862)	19599.1	9442	1.0536	6.8757e-05	0.0025773	-//-
FBgn0033194	Vacuolar protein sorting 13(Vps13)	1818.13	876.044	1.0534	3.0446e-06	0.00020437	sp|A1Z713|VPS13_DROME Vacuolar protein sorting-associated protein 13 OS=Drosophila melanogaster OX=7227 GN=Vps13 PE=1 SV=2//0
FBgn0032797	CG10186 gene product from transcript CG10186-RA(CG10186)	3052.79	1471.63	1.0527	3.3478e-06	0.00022102	sp|Q22328|LEV9_CAEEL Protein lev-9 OS=Caenorhabditis elegans OX=6239 GN=lev-9 PE=1 SV=3//4.04344e-08
FBgn0053329	Serine-peptidase 212(Sp212)	371.908	179.304	1.0525	2.0038e-05	0.00097711	sp|O62589|GD_DROME Serine protease gd OS=Drosophila melanogaster OX=7227 GN=gd PE=1 SV=2//1.74367e-28
FBgn0000042	Actin 5C(Act5C)	23277.6	11227.7	1.0519	1.3634e-06	0.00010566	sp|P84185|ACT5C_ANOGA Actin-5C OS=Anopheles gambiae OX=7165 GN=Act5C PE=2 SV=1//0
FBgn0027575	metabotropic GABA-B receptor subtype 2(GABA-B-R2)	481.751	232.421	1.0515	1.4168e-05	0.00073141	sp|O75899|GABR2_HUMAN Gamma-aminobutyric acid type B receptor subunit 2 OS=Homo sapiens OX=9606 GN=GABBR2 PE=1 SV=1//0
FBgn0033985	CG10257 gene product from transcript CG10257-RA(CG10257)	77.8394	37.599	1.0498	0.0021271	0.038172	sp|Q8R5H8|FAIM1_RAT Fas apoptotic inhibitory molecule 1 OS=Rattus norvegicus OX=10116 GN=Faim PE=2 SV=1//7.79672e-39
FBgn0030310	Peptidoglycan recognition protein SA(PGRP-SA)	1641.48	795.564	1.0449	0.0001193	0.0041215	sp|Q9VYX7|PGPSA_DROME Peptidoglycan-recognition protein SA OS=Drosophila melanogaster OX=7227 GN=PGRP-SA PE=1 SV=1//5.53676e-137
FBgn0038165	TWIK-related acid-sensitive K[+] channel 6(Task6)	269.184	130.66	1.0428	4.7246e-05	0.0019687	sp|O17185|SUP9_CAEEL Two pore potassium channel protein sup-9 OS=Caenorhabditis elegans OX=6239 GN=sup-9 PE=1 SV=2//7.32034e-105
FBgn0030294	PTIP associated 1(Pa1)	728.8	354.005	1.0418	0.0024744	0.042432	-//-
FBgn0087005	retinophilin(rtp)	1490.1	723.834	1.0417	7.8237e-06	0.00044668	sp|Q9VN91|MORN4_DROME MORN repeat-containing protein 4 homolog OS=Drosophila melanogaster OX=7227 GN=rtp PE=1 SV=1//1.0258e-111
FBgn0040959	CG17814 gene product from transcript CG17814-RA(Peritrophin-15a)	523.289	254.598	1.0394	1.4935e-05	0.00076552	-//-
FBgn0001258	Ecdysone-inducible gene L3(ImpL3)	741.682	360.86	1.0394	7.7347e-06	0.00044317	sp|Q95028|LDH_DROME L-lactate dehydrogenase OS=Drosophila melanogaster OX=7227 GN=ImpL3 PE=2 SV=1//0
FBgn0069969	CG40498 gene product from transcript CG40498-RG(CG40498)	519.39	252.9	1.0382	0.00060584	0.014904	-//-
FBgn0023407	CG9239 gene product from transcript CG9239-RC(B4)	1415.51	690.412	1.0358	4.9274e-06	0.00031245	-//-
FBgn0031239	CG17075 gene product from transcript CG17075-RB(CG17075)	173.437	84.761	1.0329	0.0001314	0.0044662	sp|Q14AK4|ZDH11_MOUSE Probable palmitoyltransferase ZDHHC11 OS=Mus musculus OX=10090 GN=Zdhhc11 PE=2 SV=2//2.28903e-29
FBgn0264449	CG43867 gene product from transcript CG43867-RA(CG43867)	411.33	201.188	1.0318	2.0394e-05	0.00099145	sp|Q9W5D0|Y34F_DROME Uncharacterized protein CG43867 OS=Drosophila melanogaster OX=7227 GN=CG43867 PE=1 SV=4//0
FBgn0004368	Protein tyrosine phosphatase 4E(Ptp4E)	851.837	416.699	1.0316	9.3037e-06	0.00051647	sp|P35992|PTP10_DROME Tyrosine-protein phosphatase 10D OS=Drosophila melanogaster OX=7227 GN=Ptp10D PE=1 SV=4//0
FBgn0030048	CG12112 gene product from transcript CG12112-RA(CG12112)	338.748	165.782	1.0309	1.63e-05	0.00082753	-//-
FBgn0031110	Odorant-binding protein 19b(Obp19b)	422.238	206.764	1.0301	4.9922e-05	0.0020382	-//-
FBgn0038732	CG11391 gene product from transcript CG11391-RA(CG11391)	80.8096	39.5985	1.0291	0.0011378	0.023592	sp|Q54P79|4CL3_DICDI Probable 4-coumarate--CoA ligase 3 OS=Dictyostelium discoideum OX=44689 GN=4cl3 PE=3 SV=2//3.81914e-42
FBgn0039916	Eye-enriched kainate receptor(Ekar)	214.037	104.93	1.0284	0.00013947	0.004681	sp|Q13002|GRIK2_HUMAN Glutamate receptor ionotropic, kainate 2 OS=Homo sapiens OX=9606 GN=GRIK2 PE=1 SV=1//4.06118e-178
FBgn0261928	CG42795 gene product from transcript CG42795-RF(CG42795)	959.391	470.922	1.0266	7.8737e-06	0.00044794	sp|Q69ZT9|TBC30_MOUSE TBC1 domain family member 30 OS=Mus musculus OX=10090 GN=Tbc1d30 PE=1 SV=2//9.31458e-92
FBgn0024329	CG7717 gene product from transcript CG7717-RB(Mekk1)	930.663	457.173	1.0255	8.2494e-06	0.00046437	sp|Q9Y6R4|M3K4_HUMAN Mitogen-activated protein kinase kinase kinase 4 OS=Homo sapiens OX=9606 GN=MAP3K4 PE=1 SV=2//4.04926e-23
FBgn0037719	bocksbeutel(bocks)	421.442	207.062	1.0253	1.7961e-05	0.00089768	sp|Q709R6|BOCKS_DROME LEM domain-containing protein Bocksbeutel OS=Drosophila melanogaster OX=7227 GN=bocks PE=1 SV=1//0
FBgn0037293	CG12007 gene product from transcript CG12007-RA(CG12007)	632.115	311.129	1.0227	1.6012e-05	0.00081552	sp|Q5NVK5|PGTA_PONAB Geranylgeranyl transferase type-2 subunit alpha OS=Pongo abelii OX=9601 GN=RABGGTA PE=2 SV=1//7.48935e-73
FBgn0033087	Heparan sulfate C5-epimerase(Hsepi)	450.997	221.99	1.0226	2.1003e-05	0.0010149	sp|F1QR43|GLCEB_DANRE D-glucuronyl C5-epimerase B OS=Danio rerio OX=7955 GN=glceb PE=1 SV=1//1.41529e-143
FBgn0085443	sprint(spri)	818.529	402.906	1.0226	9.6377e-06	0.00053316	sp|Q8MQW8|SPRI_DROME Protein sprint OS=Drosophila melanogaster OX=7227 GN=spri PE=2 SV=3//1.06376e-75
FBgn0266417	CG45057 gene product from transcript CG45057-RA(CG45057)	1114.77	549.728	1.02	5.786e-06	0.00035429	sp|Q9VV43|Y5057_DROME TPPP family protein CG45057 OS=Drosophila melanogaster OX=7227 GN=CG45057 PE=2 SV=1//5.687e-108
FBgn0260943	RNA-binding protein 6(Rbp6)	1496.77	738.746	1.0187	5.959e-05	0.0022981	sp|Q9VVE5|MSIR6_DROME RNA-binding protein Musashi homolog Rbp6 OS=Drosophila melanogaster OX=7227 GN=Rbp6 PE=2 SV=3//0
FBgn0028996	CG1922 gene product from transcript CG1922-RB(onecut)	800.631	395.627	1.017	2.3797e-05	0.0011262	sp|Q9NJB5|ONEC_DROME Homeobox protein onecut OS=Drosophila melanogaster OX=7227 GN=onecut PE=2 SV=2//0
FBgn0023489	PvuII-PstI homology 13(Pph13)	122.019	60.3557	1.0155	0.00073227	0.016952	sp|O42115|ARX_DANRE Aristaless-related homeobox protein OS=Danio rerio OX=7955 GN=arx PE=2 SV=1//2.02393e-31
FBgn0040571	CG17193 gene product from transcript CG17193-RB(CG17193)	73.8669	36.5728	1.0142	0.0023217	0.040619	-//-
FBgn0034909	CG4797 gene product from transcript CG4797-RB(CG4797)	1413.22	701.749	1.01	5.7424e-06	0.00035365	sp|B4HNS1|TRE12_DROSE Facilitated trehalose transporter Tret1-2 homolog OS=Drosophila sechellia OX=7238 GN=Tret1-2 PE=3 SV=1//2.07404e-62
FBgn0004167	karst(kst)	3136.68	1557.5	1.01	7.3678e-06	0.00042519	sp|Q9NRC6|SPTN5_HUMAN Spectrin beta chain, non-erythrocytic 5 OS=Homo sapiens OX=9606 GN=SPTBN5 PE=1 SV=2//9.38795e-06
FBgn0263413	ncRNA(CR43459)	98.9411	49.2182	1.0074	0.00083733	0.018867	-//-
FBgn0053653	Calcium-dependent secretion activator(Cadps)	1622.01	806.893	1.0073	0.00057623	0.014399	sp|Q9NHE5|CAPS_DROME Calcium-dependent secretion activator OS=Drosophila melanogaster OX=7227 GN=Cadps PE=1 SV=3//0
FBgn0027594	draper(drpr)	1635.85	813.822	1.0073	6.6128e-06	0.00039292	sp|Q9W0A0|DRPR_DROME Protein draper OS=Drosophila melanogaster OX=7227 GN=drpr PE=1 SV=3//0
FBgn0031955	CG14535 gene product from transcript CG14535-RB(CG14535)	83.1757	41.4082	1.0062	0.0015858	0.030287	sp|Q9VLW2|KI26L_DROME Kinesin-like protein CG14535 OS=Drosophila melanogaster OX=7227 GN=CG14535 PE=2 SV=2//0
FBgn0028550	Activating transcription factor 3(Atf3)	757.456	377.875	1.0033	5.8799e-05	0.0022769	sp|Q9XZS8|ATF3_DROME Activating transcription factor 3 OS=Drosophila melanogaster OX=7227 GN=Atf3 PE=1 SV=1//0
FBgn0029094	anti-silencing factor 1(asf1)	394.611	196.86	1.0033	0.0004983	0.012894	sp|Q9V464|ASF1_DROME Histone chaperone asf1 OS=Drosophila melanogaster OX=7227 GN=asf1 PE=1 SV=1//6.89293e-158
FBgn0264089	slit(sli)	587.256	293.033	1.0029	2.7527e-05	0.0012618	sp|P24014|SLIT_DROME Protein slit OS=Drosophila melanogaster OX=7227 GN=sli PE=1 SV=2//0
FBgn0022029	lethal (2) k01209(l(2)k01209)	540.201	269.797	1.0016	2.6199e-05	0.0012148	sp|Q91YL3|UCKL1_MOUSE Uridine-cytidine kinase-like 1 OS=Mus musculus OX=10090 GN=Uckl1 PE=1 SV=1//0
FBgn0033124	Tetraspanin 42Ec(Tsp42Ec)	253.699	126.772	1.0009	6.5936e-05	0.0025126	sp|Q76B49|CD63_FELCA CD63 antigen OS=Felis catus OX=9685 GN=CD63 PE=2 SV=3//2.13243e-10
FBgn0036969	Serpin 77Bb(Spn77Bb)	5248.11	10501.9	-1.0008	4.8349e-06	0.0003078	sp|Q0E8C8|SP77B_DROME Serine protease inhibitor 77Ba OS=Drosophila melanogaster OX=7227 GN=Spn77Ba PE=2 SV=1//4.70245e-42
FBgn0051419	CG31419 gene product from transcript CG31419-RB(CG31419)	507.531	1016.32	-1.0018	1.1871e-05	0.00063696	-//-
FBgn0039872	salty dog(salt)	383.82	769.391	-1.0033	1.1754e-05	0.0006349	sp|A7MBD8|SC5AC_BOVIN Sodium-coupled monocarboxylate transporter 2 OS=Bos taurus OX=9913 GN=SLC5A12 PE=2 SV=1//2.34186e-89
FBgn0033065	CG8345 gene product from transcript CG8345-RB(Cyp6w1)	1523.7	3066.5	-1.009	0.00013298	0.0045105	sp|Q9V9L1|CP6W1_DROME Probable cytochrome P450 6w1 OS=Drosophila melanogaster OX=7227 GN=Cyp6w1 PE=2 SV=1//0
FBgn0052816	CG32816 gene product from transcript CG32816-RC(CG32816)	30.9184	62.5782	-1.0172	0.0027303	0.045915	-//-
FBgn0032820	fructose-1,6-bisphosphatase(fbp)	1627.88	3324.86	-1.0303	2.7586e-06	0.00018832	sp|P00637|F16P1_RABIT Fructose-1,6-bisphosphatase 1 OS=Oryctolagus cuniculus OX=9986 GN=FBP1 PE=1 SV=4//1.45593e-143
FBgn0038718	CG17752 gene product from transcript CG17752-RA(CG17752)	794.821	1623.57	-1.0305	6.4624e-06	0.00038976	sp|Q9VCA2|ORCT_DROME Organic cation transporter protein OS=Drosophila melanogaster OX=7227 GN=Orct PE=1 SV=1//2.83563e-48
FBgn0266366	ncRNA(CR45014)	47.4864	97.3819	-1.0361	0.0028149	0.046894	-//-
FBgn0266884	ncRNA(CR45345)	69.0481	142.885	-1.0492	0.0001425	0.0047627	-//-
FBgn0001128	Glycerol 3 phosphate dehydrogenase(Gpdh)	6795.81	14073.9	-1.0503	1.2518e-06	9.8931e-05	sp|P13706|GPDA_DROME Glycerol-3-phosphate dehydrogenase [NAD(+)], cytoplasmic OS=Drosophila melanogaster OX=7227 GN=Gpdh PE=1 SV=3//0
FBgn0033170	secretory Phospholipase A2(sPLA2)	351.605	728.625	-1.0512	6.9812e-06	0.00040876	sp|Q7M4I5|PA2_APIDO Phospholipase A2 OS=Apis dorsata OX=7462 PE=1 SV=1//1.35178e-27
FBgn0028872	CG18095 gene product from transcript CG18095-RB(CG18095)	48.222	100.104	-1.0537	0.00043836	0.011605	sp|P70389|ALS_MOUSE Insulin-like growth factor-binding protein complex acid labile subunit OS=Mus musculus OX=10090 GN=Igfals PE=1 SV=1//2.21275e-10
FBgn0087002	Retinoid- and fatty acid-binding glycoprotein(Rfabg)	20245.5	42030.6	-1.0538	3.6725e-05	0.0016054	sp|Q9V496|APLP_DROME Apolipophorins OS=Drosophila melanogaster OX=7227 GN=apolpp PE=1 SV=2//0
FBgn0265164	ncRNA(CR44233)	33.0941	68.9546	-1.0591	0.0017384	0.03281	-//-
FBgn0263326	CG43407 gene product from transcript CG43407-RB(CG43407)	72.9191	152.224	-1.0618	0.00025405	0.0075269	-//-
FBgn0083966	CG34130 gene product from transcript CG34130-RA(CG34130)	485.189	1025.24	-1.0793	2.4306e-06	0.00017103	sp|Q9VP95|SEMS_DROME Seminase OS=Drosophila melanogaster OX=7227 GN=Sems PE=1 SV=1//3.10027e-17
FBgn0035090	CG2736 gene product from transcript CG2736-RA(CG2736)	1027.7	2177.52	-1.0833	9.9439e-07	8.1393e-05	sp|Q14108|SCRB2_HUMAN Lysosome membrane protein 2 OS=Homo sapiens OX=9606 GN=SCARB2 PE=1 SV=2//1.94494e-20
FBgn0265349	Seminal fluid protein 33A4(Sfp33A4)	136.875	292.991	-1.098	0.00057874	0.014417	-//-
FBgn0265267	CG18258 gene product from transcript CG18258-RA(CG18258)	1233.24	2645.21	-1.1009	6.9533e-07	6.0626e-05	sp|P27878|VIT1_CERCA Vitellogenin-1 OS=Ceratitis capitata OX=7213 GN=VG1-GAMMA PE=2 SV=1//7.74898e-30
FBgn0034159	CG15615 gene product from transcript CG15615-RB(CG15615)	29.2333	63.4483	-1.118	0.0014102	0.027759	-//-
FBgn0040653	Immune induced molecule 4(IM4)	5276.57	11459.2	-1.1188	1.2234e-05	0.00064944	sp|P82705|IM04_DROME Immune-induced peptide 4 OS=Drosophila melanogaster OX=7227 GN=IM4 PE=1 SV=2//1.10434e-07
FBgn0266891	ncRNA(CR45351)	49.8467	108.452	-1.1215	0.00013491	0.0045662	-//-
FBgn0036316	CG10960 gene product from transcript CG10960-RC(CG10960)	3349.54	7343.98	-1.1326	1.4222e-07	1.511e-05	sp|B4QBN3|TRE12_DROSI Facilitated trehalose transporter Tret1-2 homolog OS=Drosophila simulans OX=7240 GN=Tret1-2 PE=3 SV=1//1.21908e-99
FBgn0283461	Drosomycin(Drs)	10399.8	22865	-1.1366	6.3414e-05	0.0024281	sp|P41964|DMYC_DROME Drosomycin OS=Drosophila melanogaster OX=7227 GN=Drs PE=1 SV=1//1.4039e-34
FBgn0263868	ncRNA(CR43715)	181.56	399.296	-1.137	0.002237	0.039568	-//-
FBgn0264518	ncRNA(CR43917)	77.5924	171.588	-1.145	0.00087445	0.019566	-//-
FBgn0010385	Defensin(Def)	741.77	1659.71	-1.1619	0.00068121	0.01623	sp|P36192|DEFI_DROME Defensin OS=Drosophila melanogaster OX=7227 GN=Def PE=3 SV=1//7.06239e-48
FBgn0038014	CG10041 gene product from transcript CG10041-RA(CG10041)	177.515	397.846	-1.1643	1.4704e-06	0.00011233	sp|Q03238|GRAM_RAT Granzyme M (Fragment) OS=Rattus norvegicus OX=10116 GN=Gzmm PE=1 SV=1//2.51488e-20
FBgn0036262	CG6910 gene product from transcript CG6910-RC(CG6910)	4642.58	10434.3	-1.1683	6.1281e-06	0.00037139	sp|Q9QXN5|MIOX_MOUSE Inositol oxygenase OS=Mus musculus OX=10090 GN=Miox PE=1 SV=2//7.3722e-101
FBgn0286508	β Hydroxy acid dehydrogenase 1 (Had1)	1264.68	2884.78	-1.1897	7.9228e-07	6.6898e-05	sp|Q8SPX7|CRYL1_BOVIN Lambda-crystallin homolog OS=Bos taurus OX=9913 GN=CRYL1 PE=2 SV=3//1.94991e-106
FBgn0067905	Immune induced molecule 14(IM14)	1987.63	4545.8	-1.1935	0.0009272	0.020377	sp|P83869|IM14_DROME Immune-induced peptide 14 OS=Drosophila melanogaster OX=7227 GN=IM14 PE=1 SV=2//2.96925e-10
FBgn0029765	CG16756 gene product from transcript CG16756-RA(CG16756)	467.744	1072.13	-1.1967	0.00011882	0.0041215	sp|P48816|LYS_BOMMO Lysozyme OS=Bombyx mori OX=7091 PE=1 SV=1//2.9434e-29
FBgn0262574	CG43114 gene product from transcript CG43114-RA(CG43114)	809.137	1872.78	-1.2107	0.00067649	0.016198	-//-
FBgn0037832	Desiccate(Desi)	46.4638	107.676	-1.2125	5.0332e-05	0.0020391	-//-
FBgn0015586	Accessory gland protein 76A(Acp76A)	1641.01	3807.75	-1.2144	5.7572e-08	6.8928e-06	sp|Q9VVW1|A76A_DROME Accessory gland protein Acp76A OS=Drosophila melanogaster OX=7227 GN=Acp76A PE=2 SV=2//0
FBgn0040813	Neuropeptide-like precursor 2(Nplp2)	32480	75735.4	-1.2214	1.8859e-05	0.00093672	sp|Q9VU58|NPLP2_DROME Neuropeptide-like 2 OS=Drosophila melanogaster OX=7227 GN=Nplp2 PE=1 SV=1//2.55102e-38
FBgn0038147	CCHamide-2(CCHa2)	1864.79	4375.15	-1.2303	2.7629e-08	3.6938e-06	sp|Q8SXL2|CCHA2_DROME Neuropeptide CCHamide-2 OS=Drosophila melanogaster OX=7227 GN=CCHa2 PE=1 SV=1//1.04358e-71
FBgn0031558	CG16704 gene product from transcript CG16704-RB(CG16704)	429.025	1015.54	-1.2431	0.0024756	0.042432	sp|P11424|IMAP_DROFU Male accessory gland serine protease inhibitor OS=Drosophila funebris OX=7221 GN=PapD PE=1 SV=1//4.24197e-08
FBgn0266738	ncRNA(CR45211)	39.5753	94.1326	-1.2501	0.00077415	0.017742	-//-
FBgn0034195	Serpin 53F(Spn53F)	99.4899	243.314	-1.2902	2.6025e-06	0.00018074	sp|Q7YTY6|SP42D_DROME Serine protease inhibitor 42Dd OS=Drosophila melanogaster OX=7227 GN=Spn42Dd PE=2 SV=1//1.28657e-36
FBgn0034394	CG15096 gene product from transcript CG15096-RA(CG15096)	1251.85	3092.55	-1.3047	4.5482e-08	5.6563e-06	sp|Q9V7S5|PICO_DROME Putative inorganic phosphate cotransporter OS=Drosophila melanogaster OX=7227 GN=Picot PE=2 SV=1//6.19836e-104
FBgn0028987	Serpin 28F(Spn28F)	1925.1	4770.09	-1.3091	1.0615e-08	1.6374e-06	sp|Q7YTY6|SP42D_DROME Serine protease inhibitor 42Dd OS=Drosophila melanogaster OX=7227 GN=Spn42Dd PE=2 SV=1//1.58785e-107
FBgn0038257	Senescence marker protein-30(smp-30)	905.931	2259.65	-1.3186	2.1679e-05	0.0010382	sp|Q5R837|RGN_PONAB Regucalcin OS=Pongo abelii OX=9601 GN=RGN PE=2 SV=1//1.83573e-49
FBgn0085256	CG34227 gene product from transcript CG34227-RA(CG34227)	363.191	917.611	-1.3372	7.3832e-09	1.2087e-06	-//-
FBgn0053012	CG33012 gene product from transcript CG33012-RC(CG33012)	12.3454	31.2663	-1.3406	0.0026421	0.044806	sp|Q6UPR8|ERMP1_RAT Endoplasmic reticulum metallopeptidase 1 OS=Rattus norvegicus OX=10116 GN=Ermp1 PE=1 SV=1//4.68032e-100
FBgn0036527	CG7304 gene product from transcript CG7304-RB(CG7304)	134.503	342.902	-1.3502	5.1579e-08	6.2217e-06	sp|Q8IA44|GLT12_DROME Putative polypeptide N-acetylgalactosaminyltransferase 12 OS=Drosophila melanogaster OX=7227 GN=pgant12 PE=2 SV=1//0
FBgn0263083	CG43351 gene product from transcript CG43351-RA(CG43351)	401.374	1045.02	-1.3805	1.1967e-05	0.00063996	-//-
FBgn0024289	Sorbitol dehydrogenase 1(Sodh-1)	1634.14	4430.36	-1.4389	0.00056715	0.014195	sp|Q64442|DHSO_MOUSE Sorbitol dehydrogenase OS=Mus musculus OX=10090 GN=Sord PE=1 SV=3//2.76383e-138
FBgn0085320	CG34291 gene product from transcript CG34291-RA(CG34291)	552.54	1512.14	-1.4524	1.8513e-06	0.0001375	-//-
FBgn0262943	ncRNA(CR43262)	19.9593	56.8755	-1.5107	4.7946e-05	0.0019928	-//-
FBgn0038074	Glycine N-methyltransferase(Gnmt)	2614.35	7475.56	-1.5157	3.9589e-12	1.3232e-09	sp|Q29513|GNMT_RABIT Glycine N-methyltransferase (Fragment) OS=Oryctolagus cuniculus OX=9986 GN=GNMT PE=2 SV=1//1.90205e-115
FBgn0085195	CG34166 gene product from transcript CG34166-RD(CG34166)	1707.27	4994.49	-1.5486	2.787e-06	0.00018946	-//-
FBgn0010388	Drosocin(Dro)	6359.51	19318.4	-1.603	5.1606e-05	0.0020802	sp|P36193|DROS_DROME Drosocin OS=Drosophila melanogaster OX=7227 GN=Dro PE=1 SV=2//6.66971e-29
FBgn0037204	CG11131 gene product from transcript CG11131-RB(CG11131)	11.1554	33.9227	-1.6045	0.00042065	0.011199	-//-
FBgn0014865	Metchnikowin(Mtk)	4902.77	16257.1	-1.7294	0.00023302	0.0070137	sp|Q24395|MTK_DROME Metchnikowin OS=Drosophila melanogaster OX=7227 GN=Mtk PE=1 SV=1//1.57742e-30
FBgn0266405	ncRNA(CR45045)	784.46	2716.31	-1.7919	0.001649	0.031308	-//-
FBgn0039811	CG15550 gene product from transcript CG15550-RA(CG15550)	2.72247	17.6542	-2.697	0.00010229	0.0036306	-//-
FBgn0264541	CG43920 gene product from transcript CG43920-RB(CG43920)	64.2104	458.184	-2.835	0.0029725	0.049162	-//-

## Sheet: Young FHV 48h
Table S6. List of diffrentially expressed genes at least two-fold (C).
Young FHV 48h
FLYBASE_GENE_ID	Name	Mean readcount_Young FHV48	Mean readcount_Young Tris48	log2FoldChange	pval	padj	Blast swiss prot
FBgn0052241	CG32241 gene product from transcript CG32241-RB(CG32241)	9.25687	0	Inf	9.7254e-05	0.00080606	-//-
FBgn0259926	CG42449 gene product from transcript CG42449-RB(CG42449)	6.02472	0	Inf	0.001476	0.0080528	-//-
FBgn0262683	CG43153 gene product from transcript CG43153-RA(CG43153)	18.0782	0	Inf	2.2674e-09	7.3823e-08	-//-
FBgn0036949	CG7290 gene product from transcript CG7290-RB(CG7290)	15.8599	0	Inf	2.5233e-08	6.0523e-07	sp|O17450|PE48_CHRBE Peritrophin-48 OS=Chrysomya bezziana OX=69364 PE=2 SV=1//4.89093e-27
FBgn0013276	Heat-shock-protein-70Ab(Hsp70Ab)	31.1667	0	Inf	2.1273e-15	2.9683e-13	sp|P02825|HSP71_DROME Major heat shock 70 kDa protein Ab OS=Drosophila melanogaster OX=7227 GN=Hsp70Ab PE=2 SV=3//0
FBgn0267544	ncRNA(CR45884)	5.38478	0	Inf	0.0030559	0.014721	-//-
FBgn0042086	Tetraspanin 42Eb(Tsp42Eb)	8.82621	0	Inf	5.9269e-05	0.00052341	sp|Q76B49|CD63_FELCA CD63 antigen OS=Felis catus OX=9685 GN=CD63 PE=2 SV=3//4.18457e-20
FBgn0041225	Gustatory receptor 94a(Gr94a)	149.088	1.4053	6.7291	3.8137e-29	3.0598e-26	sp|Q8IMZ5|GR94A_DROME Putative gustatory receptor 94a OS=Drosophila melanogaster OX=7227 GN=Gr94a PE=2 SV=1//0
FBgn0086659	ncRNA(snoRNA:Psi18S-176)	18.8804	0.339665	5.7966	9.8946e-09	2.6774e-07	-//-
FBgn0053542	unpaired 3(upd3)	335.64	6.41712	5.7088	6.7858e-12	4.3554e-10	-//-
FBgn0031756	CG13992 gene product from transcript CG13992-RC(CG13992)	56.0263	1.42476	5.2973	7.1245e-08	1.5122e-06	-//-
FBgn0265343	ncRNA(CR44297)	25.279	0.693591	5.1877	1.1508e-10	5.1436e-09	-//-
FBgn0033830	CG10814 gene product from transcript CG10814-RA(CG10814)	38.421	1.08895	5.1409	1.4953e-08	3.8451e-07	sp|Q9QZU7|BODG_RAT Gamma-butyrobetaine dioxygenase OS=Rattus norvegicus OX=10116 GN=Bbox1 PE=1 SV=1//3.83684e-75
FBgn0266941	ncRNA(CR45392)	24.141	0.725968	5.0554	6.7146e-08	1.4404e-06	-//-
FBgn0013275	Heat-shock-protein-70Aa(Hsp70Aa)	11.6982	0.362984	5.0102	1.8117e-05	0.00019088	sp|P02825|HSP71_DROME Major heat shock 70 kDa protein Ab OS=Drosophila melanogaster OX=7227 GN=Hsp70Ab PE=2 SV=3//0
FBgn0036627	Gag-related(Gagr)	1973.71	63.8455	4.9502	3.2873e-22	1.3187e-19	-//-
FBgn0013278	Heat-shock-protein-70Bb(Hsp70Bb)	117.615	3.90475	4.9127	7.0137e-09	1.9884e-07	sp|Q9BIR7|HSP75_DROME Major heat shock 70 kDa protein Bc OS=Drosophila melanogaster OX=7227 GN=Hsp70Bc PE=2 SV=2//0
FBgn0086027	ncRNA(snoRNA:Or-CD1)	9.36155	0.353926	4.7252	0.00019083	0.0014275	-//-
FBgn0261363	Prophenoloxidase 3(PPO3)	307.231	12.6517	4.6019	2.8069e-10	1.1431e-08	sp|Q9W1V6|PPO3_DROME Phenoloxidase 3 OS=Drosophila melanogaster OX=7227 GN=PPO3 PE=1 SV=1//0
FBgn0041184	Suppressor of cytokine signaling at 36E(Socs36E)	7329.42	320.249	4.5164	1.4075e-13	1.313e-11	sp|O54928|SOCS5_MOUSE Suppressor of cytokine signaling 5 OS=Mus musculus OX=10090 GN=Socs5 PE=1 SV=2//3.1883e-71
FBgn0010042	Glutathione S transferase D6(GstD6)	38.159	1.75922	4.439	9.2713e-14	9.298e-12	sp|Q9VG94|GSTD6_DROME Glutathione S-transferase D6 OS=Drosophila melanogaster OX=7227 GN=GstD6 PE=1 SV=1//5.22041e-145
FBgn0013277	Heat-shock-protein-70Ba(Hsp70Ba)	28.7642	1.41956	4.3408	5.4367e-07	8.929e-06	sp|Q9BIR7|HSP75_DROME Major heat shock 70 kDa protein Bc OS=Drosophila melanogaster OX=7227 GN=Hsp70Bc PE=2 SV=2//0
FBgn0053299	CG33299 gene product from transcript CG33299-RB(CG33299)	20.767	1.06178	4.2897	4.3108e-08	9.7837e-07	-//-
FBgn0037974	CG12224 gene product from transcript CG12224-RC(CG12224)	152.875	8.01831	4.2529	3.5185e-12	2.4127e-10	sp|O81884|GALDH_ARATH L-galactose dehydrogenase OS=Arabidopsis thaliana OX=3702 GN=LGALDH PE=1 SV=1//8.27181e-48
FBgn0005660	Ets at 21C(Ets21C)	2304.4	122.689	4.2313	1.2751e-14	1.5268e-12	sp|P29776|ETS6_DROME DNA-binding protein D-ETS-6 OS=Drosophila melanogaster OX=7227 GN=Ets21C PE=2 SV=2//0
FBgn0031471	CG3117 gene product from transcript CG3117-RB(CG3117)	48	7.2405	4.128	3.4142e-30	3.424e-27	sp|Q9GRW0|PPAF2_HOLDI Phenoloxidase-activating factor 2 OS=Holotrichia diomphalia OX=33394 GN=PPAF2 PE=1 SV=1//5.9478e-50
FBgn0285912	mahogany (mah)	23.2513	1.35866	4.0971	1.6164e-08	4.1104e-07	-//-
FBgn0028978	tribbles(trbl)	5979.98	354.016	4.0783	3.9239e-15	5.291e-13	sp|Q9V3Z1|TRIB_DROME Tribbles OS=Drosophila melanogaster OX=7227 GN=trbl PE=1 SV=1//0
FBgn0039593	Stress induced DNase(Sid)	714.313	44.5419	4.0033	4.9718e-15	6.5391e-13	-//-
FBgn0034756	CG4373 gene product from transcript CG4373-RA(Cyp6d2)	1671.97	106.625	3.9709	8.5026e-30	7.5796e-27	sp|Q9W223|CP6D2_DROME Probable cytochrome P450 6d2 OS=Drosophila melanogaster OX=7227 GN=Cyp6d2 PE=2 SV=1//0
FBgn0267635	ncRNA(CR45973)	82.3759	5.28673	3.9618	3.8669e-07	6.6433e-06	-//-
FBgn0033725	Cuticular protein 49Ac(Cpr49Ac)	266.814	17.2992	3.9471	3.3447e-08	7.7668e-07	sp|Q7M4F4|CUD1_SCHGR Endocuticle structural glycoprotein SgAbd-1 OS=Schistocerca gregaria OX=7010 PE=1 SV=1//1.5865e-11
FBgn0043854	slow as molasses(slam)	227.426	15.0228	3.9202	3.2091e-24	1.7165e-21	-//-
FBgn0085411	CG34382 gene product from transcript CG34382-RC(CG34382)	10.2148	0.702649	3.8617	0.0014811	0.0080697	-//-
FBgn0266637	ncRNA(CR45144)	209.848	15.0903	3.7977	6.4988e-22	2.5434e-19	sp|O15085|ARHGB_HUMAN Rho guanine nucleotide exchange factor 11 OS=Homo sapiens OX=9606 GN=ARHGEF11 PE=1 SV=1//5.15434e-16
FBgn0033997	Ionotropic receptor 51a(Ir51a)	9.40939	0.702649	3.7432	0.00067319	0.0041982	-//-
FBgn0264439	ncRNA(CR43857)	38.4145	2.87149	3.7418	1.4102e-05	0.00015365	-//-
FBgn0035476	CG12766 gene product from transcript CG12766-RA(CG12766)	911.975	69.669	3.7104	1.7283e-11	9.5302e-10	sp|P07943|ALDR_RAT Aldose reductase OS=Rattus norvegicus OX=10116 GN=Akr1b1 PE=1 SV=3//8.00435e-90
FBgn0263660	ncRNA(CR43651)	48.2261	3.83479	3.6526	5.4282e-07	8.929e-06	-//-
FBgn0035439	CG14961 gene product from transcript CG14961-RA(CG14961)	284.274	23.0696	3.6232	8.0863e-12	4.9714e-10	-//-
FBgn0034005	Integrin alphaPS4 subunit(ItgaPS4)	153.123	13.0756	3.5497	2.4088e-10	1.0014e-08	sp|Q9V7A4|ITA4_DROME Integrin alpha-PS4 OS=Drosophila melanogaster OX=7227 GN=ItgaPS4 PE=1 SV=2//0
FBgn0050121	ncRNA(CR30121)	53.6661	4.58928	3.5477	1.1609e-07	2.2998e-06	-//-
FBgn0037576	Odorant receptor 85a(Or85a)	12.4614	1.07084	3.5407	0.0025498	0.012695	sp|Q9VHS4|OR85A_DROME Odorant receptor 85a OS=Drosophila melanogaster OX=7227 GN=Or85a PE=2 SV=1//0
FBgn0267793	ncRNA(CR45232)	15.6271	1.43382	3.4461	0.00066927	0.004177	-//-
FBgn0265344	ncRNA(CR44298)	229.037	21.4503	3.4165	2.8946e-39	2.3224e-35	-//-
FBgn0267758	ncRNA(CR46089)	326.526	30.62	3.4146	7.0995e-15	8.97e-13	sp|Q9VCR7|CTNS_DROME Cystinosin homolog OS=Drosophila melanogaster OX=7227 GN=CG17119 PE=1 SV=2//1.09827e-38
FBgn0015543	ncRNA(snoRNA:Me28S-A1322)	108.666	10.2507	3.4061	2.1637e-06	2.993e-05	-//-
FBgn0022772	Origin recognition complex subunit 1(Orc1)	152.428	14.7092	3.3733	6.1982e-15	8.0023e-13	sp|O16810|ORC1_DROME Origin recognition complex subunit 1 OS=Drosophila melanogaster OX=7227 GN=Orc1 PE=1 SV=2//0
FBgn0050160	CG30160 gene product from transcript CG30160-RA(CG30160)	24.5393	2.48519	3.3037	1.4581e-07	2.8189e-06	sp|Q76B49|CD63_FELCA CD63 antigen OS=Felis catus OX=9685 GN=CD63 PE=2 SV=3//3.19795e-20
FBgn0013279	Heat-shock-protein-70Bc(Hsp70Bc)	38.8825	3.94233	3.302	6.3618e-11	3.0291e-09	sp|Q9BIR7|HSP75_DROME Major heat shock 70 kDa protein Bc OS=Drosophila melanogaster OX=7227 GN=Hsp70Bc PE=2 SV=2//0
FBgn0261567	CG42681 gene product from transcript CG42681-RA(CG42681)	10.4184	1.05657	3.3017	0.00075251	0.0045859	-//-
FBgn0263039	ncRNA(CR43334)	194.819	19.8208	3.297	1.0025e-06	1.5232e-05	-//-
FBgn0033215	CG1942 gene product from transcript CG1942-RA(CG1942)	1800.43	184.343	3.2879	2.7999e-07	5.0031e-06	sp|Q54GC1|DGAT2_DICDI Diacylglycerol O-acyltransferase 2 OS=Dictyostelium discoideum OX=44689 GN=dgat2 PE=3 SV=1//3.27746e-70
FBgn0003411	sisterless A(sisA)	20.4149	2.16885	3.2346	0.0007524	0.0045859	sp|Q9VZ09|SISA_DROME Protein sisterless A OS=Drosophila melanogaster OX=7227 GN=sisA PE=1 SV=1//2.01011e-112
FBgn0266854	pseudo(CR45315)	12.9408	1.4105	3.1977	0.00019781	0.0014701	-//-
FBgn0040251	CG6658 gene product from transcript CG6658-RB(Ugt86Di)	182.286	19.8946	3.1958	0.00011359	0.00091592	sp|P16662|UD2B7_HUMAN UDP-glucuronosyltransferase 2B7 OS=Homo sapiens OX=9606 GN=UGT2B7 PE=1 SV=2//1.5938e-60
FBgn0029970	CG17256 gene product from transcript CG17256-RA(Nek2)	25.8663	2.84432	3.1849	1.2816e-07	2.5079e-06	sp|P51955|NEK2_HUMAN Serine/threonine-protein kinase Nek2 OS=Homo sapiens OX=9606 GN=NEK2 PE=1 SV=1//9.9505e-91
FBgn0039644	CG11897 gene product from transcript CG11897-RB(CG11897)	3581.3	398.663	3.1672	6.1308e-11	2.9542e-09	sp|P91660|L259_DROME Probable multidrug resistance-associated protein lethal(2)03659 OS=Drosophila melanogaster OX=7227 GN=l(2)03659 PE=2 SV=4//0
FBgn0065099	small nuclear RNA 7SK(snRNA:7SK)	219.314	24.5347	3.1601	1.3647e-18	3.4216e-16	-//-
FBgn0039316	CG11893 gene product from transcript CG11893-RA(CG11893)	21.4815	2.4295	3.1444	2.0122e-06	2.8052e-05	-//-
FBgn0042206	Glutathione S transferase D10(GstD10)	578.576	66.9974	3.1103	2.0171e-08	4.9642e-07	sp|P30104|GSTT1_DROER Glutathione S-transferase 1-1 OS=Drosophila erecta OX=7220 GN=GstD1 PE=3 SV=2//1.45247e-108
FBgn0267624	ncRNA(CR45962)	20.9081	2.45281	3.0916	3.325e-06	4.3731e-05	sp|O61307|TENM_DROME Teneurin-m OS=Drosophila melanogaster OX=7227 GN=Ten-m PE=1 SV=2//2.08088e-42
FBgn0262148	ncRNA(CR42874)	39.2159	4.63592	3.0805	2.5564e-10	1.0518e-08	-//-
FBgn0265715	ncRNA(CR44522)	42.1131	4.98985	3.0772	7.0295e-11	3.2979e-09	-//-
FBgn0267237	ncRNA(CR45677)	84.5983	10.1652	3.057	1.0982e-05	0.00012454	-//-
FBgn0050088	CG30088 gene product from transcript CG30088-RB(CG30088)	117.841	14.2269	3.0502	1.0242e-14	1.2357e-12	sp|Q9VB68|GRASS_DROME Serine protease grass OS=Drosophila melanogaster OX=7227 GN=grass PE=1 SV=1//3.38225e-43
FBgn0016794	daughter of sevenless(dos)	4125.97	504.768	3.031	1.9323e-15	2.7197e-13	sp|Q9VZZ9|DOS_DROME Protein daughter of sevenless OS=Drosophila melanogaster OX=7227 GN=dos PE=1 SV=1//0
FBgn0010278	Structure specific recognition protein(Ssrp)	1133.96	142.345	2.9939	1.6695e-16	3.1017e-14	sp|Q05344|SSRP1_DROME FACT complex subunit Ssrp1 OS=Drosophila melanogaster OX=7227 GN=Ssrp PE=1 SV=2//4.11846e-54
FBgn0032143	CG4017 gene product from transcript CG4017-RA(CG4017)	11.111	1.42476	2.9632	0.0010118	0.0058826	sp|Q9VL86|CBPA1_DROME Zinc carboxypeptidase A 1 OS=Drosophila melanogaster OX=7227 GN=CG17633 PE=2 SV=1//9.89738e-138
FBgn0067102	Ceramide glucosyltransferase(GlcT-1)	1707.16	220.086	2.9555	8.3539e-28	5.5853e-25	sp|Q16739|CEGT_HUMAN Ceramide glucosyltransferase OS=Homo sapiens OX=9606 GN=UGCG PE=1 SV=1//1.19903e-139
FBgn0262112	shroud(sro)	16.2435	2.11835	2.9389	0.00059242	0.0037618	sp|Q80XN0|BDH_MOUSE D-beta-hydroxybutyrate dehydrogenase, mitochondrial OS=Mus musculus OX=10090 GN=Bdh1 PE=1 SV=2//1.35769e-32
FBgn0030189	CG2909 gene product from transcript CG2909-RA(CG2909)	1255.25	164.267	2.9339	5.3365e-14	5.5604e-12	-//-
FBgn0030641	CG6299 gene product from transcript CG6299-RB(CG6299)	7.90643	1.04752	2.9161	0.0071707	0.02948	sp|O22797|GLTP1_ARATH Glycolipid transfer protein 1 OS=Arabidopsis thaliana OX=3702 GN=GLTP1 PE=2 SV=1//4.42742e-18
FBgn0040503	CG7763 gene product from transcript CG7763-RB(CG7763)	89.451	12.0086	2.897	0.00026508	0.001898	sp|O46197|A29AB_DROME Accessory gland protein Acp29AB OS=Drosophila melanogaster OX=7227 GN=Acp29AB PE=2 SV=2//1.12163e-12
FBgn0052865	ncRNA(alphagamma-element:CR32865)	34.1652	4.60875	2.8901	1.3596e-07	2.6476e-06	-//-
FBgn0001230	Heat shock protein 68(Hsp68)	1892.79	256.657	2.8826	9.8424e-15	1.2056e-12	sp|O97125|HSP68_DROME Heat shock protein 68 OS=Drosophila melanogaster OX=7227 GN=Hsp68 PE=1 SV=1//0
FBgn0030016	Odorant receptor 7a(Or7a)	15.2208	2.07557	2.8745	0.00018911	0.0014167	sp|Q9W3I5|OR7A_DROME Odorant receptor 7a OS=Drosophila melanogaster OX=7227 GN=Or7a PE=2 SV=1//0
FBgn0004052	CG17962 gene product from transcript CG17962-RA(Z600)	10.4897	1.44288	2.862	0.0017275	0.0091906	sp|P22469|Z600_DROME Protein Z600 OS=Drosophila melanogaster OX=7227 GN=Z600 PE=1 SV=2//2.18404e-50
FBgn0266088	ncRNA(CR44830)	22.9074	3.16972	2.8534	0.00046983	0.0031101	-//-
FBgn0031805	CG9505 gene product from transcript CG9505-RA(CG9505)	1050.59	149.358	2.8143	1.1702e-15	1.7263e-13	sp|Q8IS64|ECE_LOCMI Endothelin-converting enzyme homolog OS=Locusta migratoria OX=7004 PE=2 SV=1//6.55138e-20
FBgn0038095	CG7241 gene product from transcript CG7241-RA(Cyp304a1)	84.4888	12.0138	2.8141	2.9667e-08	6.9903e-07	sp|Q9VG17|CP304_DROME Probable cytochrome P450 304a1 OS=Drosophila melanogaster OX=7227 GN=Cyp304a1 PE=2 SV=2//0
FBgn0266263	ncRNA(CR44958)	9.5367	1.38198	2.7868	0.0039148	0.017999	sp|Q9W497|GR05A_DROME Gustatory receptor 5a for trehalose OS=Drosophila melanogaster OX=7227 GN=Gr5a PE=1 SV=2//1.86108e-150
FBgn0038455	CG14907 gene product from transcript CG14907-RA(CG14907)	1310.12	190.76	2.7799	3.3326e-20	1.0284e-17	-//-
FBgn0265068	ncRNA(CR44179)	853.385	124.905	2.7724	1.7323e-07	3.2896e-06	sp|Q6GMR7|FAAH2_HUMAN Fatty-acid amide hydrolase 2 OS=Homo sapiens OX=9606 GN=FAAH2 PE=2 SV=1//1.08014e-117
FBgn0037151	CG7130 gene product from transcript CG7130-RA(CG7130)	765.17	112.262	2.7689	1.1315e-12	8.7186e-11	sp|Q2KIT4|DNJB4_BOVIN DnaJ homolog subfamily B member 4 OS=Bos taurus OX=9913 GN=DNAJB4 PE=2 SV=1//1.45585e-27
FBgn0015351	CG14906 gene product from transcript CG14906-RC(CG14906)	324.809	47.691	2.7678	1.8162e-10	7.7922e-09	sp|Q3U034|METL4_MOUSE Methyltransferase-like protein 4 OS=Mus musculus OX=10090 GN=Mettl4 PE=2 SV=1//1.0093e-29
FBgn0263413	ncRNA(CR43459)	395.046	58.7728	2.7488	1.4264e-09	4.8492e-08	-//-
FBgn0051514	ncRNA(CR31514)	168.345	25.3152	2.7333	5.9207e-06	7.3305e-05	-//-
FBgn0086602	ncRNA(snoRNA:Psi28S-3436b)	9.52291	1.43382	2.7315	0.0038799	0.01787	-//-
FBgn0267096	ncRNA(CR45536)	9.26173	1.39624	2.7297	0.0059147	0.025235	-//-
FBgn0032934	CG8679 gene product from transcript CG8679-RA(CG8679)	510.549	76.9991	2.7291	4.5969e-33	8.1957e-30	sp|Q8NAG6|ANKL1_HUMAN Ankyrin repeat and LEM domain-containing protein 1 OS=Homo sapiens OX=9606 GN=ANKLE1 PE=1 SV=2//2.49124e-39
FBgn0035996	CG3448 gene product from transcript CG3448-RB(CG3448)	370.282	55.861	2.7287	4.2459e-20	1.2855e-17	-//-
FBgn0002543	roundabout 2(robo2)	466.669	71.1872	2.7127	3.1548e-16	5.6246e-14	sp|Q9HCK4|ROBO2_HUMAN Roundabout homolog 2 OS=Homo sapiens OX=9606 GN=ROBO2 PE=1 SV=2//5.24826e-07
FBgn0030904	unpaired 2(upd2)	48.3113	7.39468	2.7078	1.9674e-10	8.3739e-09	-//-
FBgn0036948	CG7298 gene product from transcript CG7298-RA(CG7298)	31.8236	4.88617	2.7033	0.00030837	0.0021693	sp|O17450|PE48_CHRBE Peritrophin-48 OS=Chrysomya bezziana OX=69364 PE=2 SV=1//4.05835e-52
FBgn0039848	lysyl oxidase-like(lox)	38.3837	5.98032	2.6822	7.5786e-06	8.9946e-05	sp|F1QQC3|LOL2A_DANRE Lysyl oxidase homolog 2A OS=Danio rerio OX=7955 GN=loxl2a PE=2 SV=1//3.46905e-07
FBgn0028494	CG6424 gene product from transcript CG6424-RA(CG6424)	140.233	21.8575	2.6816	6.6239e-08	1.4267e-06	sp|Q8HYW0|FA13A_BOVIN Protein FAM13A OS=Bos taurus OX=9913 GN=FAM13A PE=2 SV=1//4.91628e-29
FBgn0052091	CG32091 gene product from transcript CG32091-RB(CG32091)	1635.97	257.547	2.6672	7.8911e-06	9.3268e-05	sp|Q64343|ABCG1_MOUSE ATP-binding cassette sub-family G member 1 OS=Mus musculus OX=10090 GN=Abcg1 PE=1 SV=1//7.2265e-99
FBgn0034709	Secreted Wg-interacting molecule(Swim)	4245.04	672.446	2.6583	1.218e-16	2.3548e-14	sp|Q99JR5|TINAL_MOUSE Tubulointerstitial nephritis antigen-like OS=Mus musculus OX=10090 GN=Tinagl1 PE=1 SV=1//2.70837e-92
FBgn0029831	CG5966 gene product from transcript CG5966-RB(CG5966)	6109.59	978.939	2.6418	8.9727e-07	1.3804e-05	sp|P27657|LIPP_RAT Pancreatic triacylglycerol lipase OS=Rattus norvegicus OX=10116 GN=Pnlip PE=1 SV=1//1.54895e-69
FBgn0015019	CG8977 gene product from transcript CG8977-RB(Cctgamma)	4200.93	676.925	2.6336	8.7036e-12	5.2503e-10	sp|P48605|TCPG_DROME T-complex protein 1 subunit gamma OS=Drosophila melanogaster OX=7227 GN=CCT3 PE=2 SV=2//0
FBgn0050045	Cuticular protein 49Aa(Cpr49Aa)	12.9887	2.09889	2.6296	0.0080747	0.032465	sp|Q7M4F2|CUD8_SCHGR Endocuticle structural glycoprotein SgAbd-8 OS=Schistocerca gregaria OX=7010 PE=1 SV=1//1.97599e-24
FBgn0050087	CG30087 gene product from transcript CG30087-RA(CG30087)	82.0807	13.4502	2.6094	2.2145e-06	3.0502e-05	sp|Q9VB68|GRASS_DROME Serine protease grass OS=Drosophila melanogaster OX=7227 GN=grass PE=1 SV=1//6.87248e-43
FBgn0003328	scab(scb)	4259.41	700.365	2.6045	1.1218e-11	6.5694e-10	sp|O44386|ITA3_DROME Integrin alpha-PS3 OS=Drosophila melanogaster OX=7227 GN=scb PE=1 SV=2//0
FBgn0050287	CG30287 gene product from transcript CG30287-RA(CG30287)	60.3081	10.033	2.5876	3.5324e-11	1.8284e-09	sp|Q9VB68|GRASS_DROME Serine protease grass OS=Drosophila melanogaster OX=7227 GN=grass PE=1 SV=1//1.09725e-32
FBgn0286075	DNA ligase 3 (DNAlig3)	988.85	166.743	2.5681	1.283e-15	1.8715e-13	sp|P49916|DNLI3_HUMAN DNA ligase 3 OS=Homo sapiens OX=9606 GN=LIG3 PE=1 SV=2//0
FBgn0038344	CG5205 gene product from transcript CG5205-RA(CG5205)	1042.45	177.095	2.5574	4.2715e-13	3.5699e-11	sp|E1BNG3|ASCC3_BOVIN Activating signal cointegrator 1 complex subunit 3 OS=Bos taurus OX=9913 GN=ascc3 PE=3 SV=1//0
FBgn0039488	CG6066 gene product from transcript CG6066-RA(CG6066)	360.97	63.0263	2.5179	1.6659e-22	7.2246e-20	sp|Q9VB74|NKAP_DROME NKAP family protein CG6066 OS=Drosophila melanogaster OX=7227 GN=CG6066 PE=1 SV=1//1.55445e-61
FBgn0033205	CG2064 gene product from transcript CG2064-RA(CG2064)	3288.6	574.979	2.5159	7.0497e-11	3.2979e-09	sp|Q8NBN7|RDH13_HUMAN Retinol dehydrogenase 13 OS=Homo sapiens OX=9606 GN=RDH13 PE=1 SV=2//2.20856e-100
FBgn0040261	CG13271 gene product from transcript CG13271-RA(Ugt36Bb)	12.0535	2.12221	2.5058	0.0019864	0.010332	sp|P54855|UDB15_HUMAN UDP-glucuronosyltransferase 2B15 OS=Homo sapiens OX=9606 GN=UGT2B15 PE=1 SV=3//1.73098e-51
FBgn0033928	CG13941 gene product from transcript CG13941-RA(Arc2)	1059.05	186.495	2.5056	3.7707e-38	2.0168e-34	sp|Q7JV70|ARC2_DROME Activity-regulated cytoskeleton associated protein 2 OS=Drosophila melanogaster OX=7227 GN=Arc2 PE=2 SV=1//2.87515e-140
FBgn0040294	Plenty of SH3s(POSH)	653.351	116.747	2.4845	1.0914e-10	4.9054e-09	sp|Q8TEJ3|SH3R3_HUMAN E3 ubiquitin-protein ligase SH3RF3 OS=Homo sapiens OX=9606 GN=SH3RF3 PE=1 SV=2//3.30781e-15
FBgn0051793	CG31793 gene product from transcript CG31793-RC(CG31793)	2259.01	409.384	2.4642	3.5582e-13	2.9892e-11	sp|P91660|L259_DROME Probable multidrug resistance-associated protein lethal(2)03659 OS=Drosophila melanogaster OX=7227 GN=l(2)03659 PE=2 SV=4//1.19631e-18
FBgn0031470	CG18557 gene product from transcript CG18557-RA(CG18557)	53.6344	9.76819	2.457	0.00080471	0.0048433	sp|Q9GRW0|PPAF2_HOLDI Phenoloxidase-activating factor 2 OS=Holotrichia diomphalia OX=33394 GN=PPAF2 PE=1 SV=1//2.54733e-54
FBgn0011774	Inverted repeat-binding protein(Irbp)	553.791	100.859	2.457	2.7013e-13	2.3056e-11	sp|Q23976|KU70_DROME ATP-dependent DNA helicase 2 subunit 1 OS=Drosophila melanogaster OX=7227 GN=Irbp PE=2 SV=3//0
FBgn0032805	CG10337 gene product from transcript CG10337-RA(CG10337)	959.619	175.394	2.4519	6.7162e-16	1.067e-13	-//-
FBgn0263241	Molybdenum cofactor synthesis 1 ortholog(Mocs1)	1009.15	184.543	2.4511	9.4003e-14	9.3688e-12	sp|Q8IQF1|MOCS1_DROME Molybdenum cofactor biosynthesis protein 1 OS=Drosophila melanogaster OX=7227 GN=Mocs1 PE=2 SV=1//0
FBgn0010383	Cytochrome P450-18a1(Cyp18a1)	1418.47	259.615	2.4499	0.00019513	0.0014529	sp|Q95078|CP18A_DROME Cytochrome P450 18a1 OS=Drosophila melanogaster OX=7227 GN=Cyp18a1 PE=2 SV=2//0
FBgn0001233	Heat shock protein 83(Hsp83)	49201.8	9103.9	2.4342	8.4916e-12	5.1809e-10	sp|P02828|HSP83_DROME Heat shock protein 83 OS=Drosophila melanogaster OX=7227 GN=Hsp83 PE=1 SV=1//0
FBgn0040212	Dihydroxyacetone phosphate acyltransferase(Dhap-at)	1489.95	275.697	2.4341	1.9639e-11	1.0755e-09	sp|A4IF87|GNPAT_BOVIN Dihydroxyacetone phosphate acyltransferase OS=Bos taurus OX=9913 GN=GNPAT PE=2 SV=1//7.95663e-78
FBgn0086782	amnesiac(amn)	9.45723	1.75922	2.4265	0.0077552	0.031443	sp|Q24049|AMN_DROME Amnesiac neuropeptides OS=Drosophila melanogaster OX=7227 GN=amn PE=1 SV=3//1.5596e-90
FBgn0085443	sprint(spri)	1883.39	350.688	2.4251	5.687e-08	1.2416e-06	sp|Q8MQW8|SPRI_DROME Protein sprint OS=Drosophila melanogaster OX=7227 GN=spri PE=2 SV=3//1.06376e-75
FBgn0037555	transcriptional Adaptor 2b(Ada2b)	1228.26	231.88	2.4052	1.1547e-29	9.7517e-27	sp|Q8I8V0|TAD2B_DROME Transcriptional adapter 2B OS=Drosophila melanogaster OX=7227 GN=Ada2b PE=1 SV=1//2.36087e-107
FBgn0031888	PDGF- and VEGF-related factor 2(Pvf2)	481.351	91.3047	2.3983	2.8374e-20	9.1057e-18	-//-
FBgn0266414	ncRNA(CR45054)	109.715	20.8489	2.3957	0.00012973	0.0010265	-//-
FBgn0032701	CG10341 gene product from transcript CG10341-RA(CG10341)	664.606	126.684	2.3913	3.4624e-08	8.017e-07	sp|Q9VJ62|NAF1_DROME H/ACA ribonucleoprotein complex non-core subunit NAF1 OS=Drosophila melanogaster OX=7227 GN=CG10341 PE=1 SV=2//0
FBgn0260866	defense repressor 1(dnr1)	4069.78	777.428	2.3882	6.4289e-07	1.0214e-05	sp|Q8WY64|MYLIP_HUMAN E3 ubiquitin-protein ligase MYLIP OS=Homo sapiens OX=9606 GN=MYLIP PE=1 SV=2//2.69403e-18
FBgn0030855	CG5800 gene product from transcript CG5800-RA(CG5800)	698.068	134.52	2.3756	2.8407e-19	7.5971e-17	sp|Q80Y44|DDX10_MOUSE Probable ATP-dependent RNA helicase DDX10 OS=Mus musculus OX=10090 GN=Ddx10 PE=1 SV=2//0
FBgn0037345	CG2948 gene product from transcript CG2948-RA(rev7)	430.193	83.7869	2.3602	4.9705e-16	8.2223e-14	sp|Q568H3|MD2L2_DANRE Mitotic spindle assembly checkpoint protein MAD2B OS=Danio rerio OX=7955 GN=mad2l2 PE=2 SV=1//6.85367e-17
FBgn0041241	Gustatory receptor 47b(Gr47b)	8.82621	1.72685	2.3537	0.012752	0.046962	sp|P58961|GR47B_DROME Putative gustatory receptor 47b OS=Drosophila melanogaster OX=7227 GN=Gr47b PE=2 SV=2//0
FBgn0031959	spatzle 3(spz3)	217.361	43.4636	2.3222	8.422e-23	3.8611e-20	sp|Q9VLV7|SPZ3_DROME Protein spaetzle 3 OS=Drosophila melanogaster OX=7227 GN=spz3 PE=2 SV=2//0
FBgn0263601	mind bomb 1(mib1)	2772	555.457	2.3192	2.6361e-18	6.4089e-16	sp|Q9VUX2|MIB_DROME E3 ubiquitin-protein ligase mind-bomb OS=Drosophila melanogaster OX=7227 GN=mib1 PE=1 SV=3//0
FBgn0267796	CG46121 gene product from transcript CG46121-RC(CG46121)	63.1265	12.7203	2.3111	8.3428e-06	9.7714e-05	sp|Q5YCC7|TMC3_CHICK Transmembrane channel-like protein 3 OS=Gallus gallus OX=9031 GN=Tmc3 PE=2 SV=1//3.38618e-50
FBgn0034853	Interacts with the C terminus of ELL 1(Ice1)	310.921	63.0641	2.3017	2.2572e-13	2.0011e-11	sp|Q9W1R4|ICE1_DROME Little elongation complex subunit 1 OS=Drosophila melanogaster OX=7227 GN=Ice1 PE=1 SV=2//0
FBgn0032387	CG16965 gene product from transcript CG16965-RC(CG16965)	464.58	94.5722	2.2964	9.7475e-14	9.5956e-12	sp|Q32M88|PGGHG_HUMAN Protein-glucosylgalactosylhydroxylysine glucosidase OS=Homo sapiens OX=9606 GN=PGGHG PE=1 SV=2//3.35151e-93
FBgn0033308	CG8736 gene product from transcript CG8736-RB(CG8736)	32.8578	6.69337	2.2954	1.6458e-06	2.3432e-05	sp|P80674|CU01_BLACR Cuticle protein 1 OS=Blaberus craniifer OX=6982 PE=1 SV=1//3.93256e-07
FBgn0038214	CG9616 gene product from transcript CG9616-RB(CG9616)	112.125	22.8699	2.2936	1.4757e-07	2.8495e-06	-//-
FBgn0028476	Ubiquitin specific protease 1(Usp1)	3151.38	648.709	2.2803	2.8674e-12	2.0092e-10	sp|Q29RP1|UBP1_BOVIN Ubiquitin carboxyl-terminal hydrolase 1 OS=Bos taurus OX=9913 GN=USP1 PE=2 SV=1//2.52231e-16
FBgn0264511	ncRNA(CR43910)	18.813	3.87758	2.2785	0.0047079	0.020996	-//-
FBgn0016076	vrille(vri)	5103.18	1061.33	2.2655	2.6859e-12	1.8902e-10	sp|O08750|NFIL3_MOUSE Nuclear factor interleukin-3-regulated protein OS=Mus musculus OX=10090 GN=Nfil3 PE=1 SV=1//6.6684e-19
FBgn0020272	misato(mst)	340.627	70.9913	2.2625	5.4081e-07	8.9171e-06	sp|O01939|MST_DROME Protein misato OS=Drosophila melanogaster OX=7227 GN=mst PE=2 SV=1//0
FBgn0011703	Ribonucleoside diphosphate reductase large subunit(RnrL)	135.247	28.2474	2.2594	2.8458e-08	6.7617e-07	sp|P48591|RIR1_DROME Ribonucleoside-diphosphate reductase large subunit OS=Drosophila melanogaster OX=7227 GN=RnrL PE=1 SV=2//0
FBgn0003655	swallow(swa)	15.1267	3.16452	2.257	0.0017609	0.009347	sp|P40688|SWA_DROME Protein swallow OS=Drosophila melanogaster OX=7227 GN=swa PE=1 SV=1//0
FBgn0266929	ncRNA(CR45380)	32.2722	6.75427	2.2564	0.0014957	0.0081354	-//-
FBgn0038953	CG18596 gene product from transcript CG18596-RA(CG18596)	1692.11	355.071	2.2526	2.0947e-12	1.5072e-10	sp|Q13395|TARB1_HUMAN Probable methyltransferase TARBP1 OS=Homo sapiens OX=9606 GN=TARBP1 PE=1 SV=1//8.43791e-42
FBgn0034480	CG16898 gene product from transcript CG16898-RA(CG16898)	1746.09	369.395	2.2409	3.6705e-06	4.7845e-05	-//-
FBgn0015570	alpha-Esterase-2(alpha-Est2)	2827.61	598.545	2.2401	0.00023935	0.0017417	sp|P16854|EST1_CULPI Esterase B1 OS=Culex pipiens OX=7175 GN=B1 PE=3 SV=1//7.35861e-120
FBgn0031114	CG1676 gene product from transcript CG1676-RB(cactin)	567.404	120.547	2.2348	2.5253e-14	2.8536e-12	sp|Q9VR99|CATIN_DROME Cactin OS=Drosophila melanogaster OX=7227 GN=cactin PE=1 SV=3//0
FBgn0027079	Valyl-tRNA synthetase(Aats-val)	1630.31	349.148	2.2232	1.3305e-12	1.0118e-10	sp|P49696|SYVC_TAKRU Valine--tRNA ligase OS=Takifugu rubripes OX=31033 GN=vars PE=3 SV=1//0
FBgn0031799	CG9493 gene product from transcript CG9493-RB(Pez)	772.905	166.656	2.2134	3.4159e-12	2.3626e-10	sp|Q62136|PTN21_MOUSE Tyrosine-protein phosphatase non-receptor type 21 OS=Mus musculus OX=10090 GN=Ptpn21 PE=1 SV=1//1.55434e-44
FBgn0038851	doublesex-Mab related 93B(dmrt93B)	170.3	36.8479	2.2084	1.8845e-12	1.3682e-10	sp|Q6YHU8|DMTA2_ORENI Doublesex- and mab-3-related transcription factor A2 OS=Oreochromis niloticus OX=8128 GN=dmrta2 PE=3 SV=1//7.87744e-31
FBgn0031913	CG5958 gene product from transcript CG5958-RA(CG5958)	8575.21	1869.42	2.1976	0.00035295	0.0024411	sp|A6JFQ6|CLVS1_RAT Clavesin-1 OS=Rattus norvegicus OX=10116 GN=Clvs1 PE=1 SV=1//1.27813e-39
FBgn0266420	Otefin(Ote)	210.404	46.055	2.1917	9.7382e-21	3.2554e-18	sp|P20240|OTE_DROME Otefin OS=Drosophila melanogaster OX=7227 GN=Ote PE=1 SV=2//0
FBgn0266633	ncRNA(CR45140)	196.102	42.989	2.1896	5.3633e-07	8.8538e-06	-//-
FBgn0038484	CG5246 gene product from transcript CG5246-RA(CG5246)	393.931	86.4122	2.1886	2.9121e-06	3.8745e-05	sp|Q17025|CTR2_ANOGA Chymotrypsin-2 OS=Anopheles gambiae OX=7165 GN=CHYM2 PE=2 SV=3//2.35107e-51
FBgn0039003	wolfram syndrome 1(wfs1)	899.055	197.559	2.1861	2.3267e-34	6.2224e-31	sp|Q8IMZ9|WFS1_DROME Wolframin OS=Drosophila melanogaster OX=7227 GN=wfs1 PE=1 SV=2//0
FBgn0266162	ncRNA(CR44868)	43.0214	9.50917	2.1777	1.9051e-07	3.567e-06	-//-
FBgn0267472	ncRNA(CR45822)	25.2174	5.59151	2.1731	4.8139e-05	0.00043913	-//-
FBgn0029689	CG6428 gene product from transcript CG6428-RA(CG6428)	1681.23	373.668	2.1697	7.362e-09	2.0798e-07	sp|Q9U518|ASPG_DIRIM L-asparaginase OS=Dirofilaria immitis OX=6287 PE=1 SV=1//2.14419e-177
FBgn0086346	ALG-2 interacting protein X(ALiX)	6494.61	1449.91	2.1633	4.6138e-14	4.8706e-12	sp|Q9QZA2|PDC6I_RAT Programmed cell death 6-interacting protein OS=Rattus norvegicus OX=10116 GN=Pdcd6ip PE=1 SV=2//6.07442e-179
FBgn0261938	mitochondrial RNA polymerase(mtRNApol)	1147.66	257.551	2.1558	3.258e-07	5.7135e-06	sp|O00411|RPOM_HUMAN DNA-directed RNA polymerase, mitochondrial OS=Homo sapiens OX=9606 GN=POLRMT PE=1 SV=2//0
FBgn0265819	ncRNA(CR44608)	16.8559	3.80762	2.1463	0.0076184	0.030995	-//-
FBgn0053963	ncRNA(CR33963)	25.1704	5.68729	2.1459	4.7773e-05	0.00043629	-//-
FBgn0034312	CG10916 gene product from transcript CG10916-RB(CG10916)	1219.73	278.397	2.1313	3.826e-12	2.6014e-10	-//-
FBgn0262983	CG43291 gene product from transcript CG43291-RC(CG43291)	33.8903	7.78233	2.1226	2.0774e-05	0.00021368	-//-
FBgn0052636	ncRNA(CR32636)	70.3987	16.1948	2.12	1.3089e-05	0.0001446	-//-
FBgn0037327	pancreatic eIF-2alpha kinase(PEK)	1551.56	357.172	2.119	6.0384e-20	1.7943e-17	sp|Q9NIV1|E2AK3_DROME Eukaryotic translation initiation factor 2-alpha kinase OS=Drosophila melanogaster OX=7227 GN=PEK PE=1 SV=2//0
FBgn0039189	CG18528 gene product from transcript CG18528-RA(CG18528)	160.236	37.2265	2.1058	1.5971e-05	0.0001713	sp|Q501Z5|GTPB3_DANRE tRNA modification GTPase GTPBP3, mitochondrial OS=Danio rerio OX=7955 GN=gtpbp3 PE=2 SV=1//1.09891e-137
FBgn0029766	CG15784 gene product from transcript CG15784-RB(CG15784)	5050.02	1176.79	2.1014	2.9443e-10	1.1871e-08	-//-
FBgn0033153	CG11086 gene product from transcript CG11086-RA(Gadd45)	977.409	228.457	2.097	3.993e-06	5.1629e-05	sp|Q9WTQ7|GA45G_RAT Growth arrest and DNA damage-inducible protein GADD45 gamma OS=Rattus norvegicus OX=10116 GN=Gadd45g PE=2 SV=1//4.4043e-10
FBgn0031643	CG3008 gene product from transcript CG3008-RA(CG3008)	2426.97	573.126	2.0822	1.4835e-09	5.0115e-08	sp|Q1RMT7|RIOK3_BOVIN Serine/threonine-protein kinase RIO3 OS=Bos taurus OX=9913 GN=RIOK3 PE=2 SV=1//4.23291e-122
FBgn0003676	Tcp1-like(T-cp1)	2267.02	537.016	2.0778	2.8751e-10	1.165e-08	sp|P12613|TCPA_DROME T-complex protein 1 subunit alpha OS=Drosophila melanogaster OX=7227 GN=CCT1 PE=2 SV=2//0
FBgn0010041	Glutathione S transferase D5(GstD5)	154.751	36.8098	2.0718	1.6615e-07	3.17e-06	sp|Q9VG95|GSTD5_DROME Glutathione S-transferase D5 OS=Drosophila melanogaster OX=7227 GN=GstD5 PE=1 SV=2//7.66883e-153
FBgn0039120	Nucleoporin 98-96kD(Nup98-96)	2503.33	597.589	2.0666	3.7007e-24	1.8557e-21	sp|Q9VCH5|NUP98_DROME Nuclear pore complex protein Nup98-Nup96 OS=Drosophila melanogaster OX=7227 GN=Nup98-96 PE=1 SV=3//0
FBgn0039044	CG33336 gene product from transcript CG33336-RB(p53)	629.085	150.696	2.0616	5.5632e-11	2.7216e-09	sp|P10361|P53_RAT Cellular tumor antigen p53 OS=Rattus norvegicus OX=10116 GN=Tp53 PE=1 SV=1//3.30667e-11
FBgn0035084	CG15861 gene product from transcript CG15861-RB(CG15861)	96.1839	23.0853	2.0588	8.905e-10	3.1936e-08	-//-
FBgn0002441	lethal (3) malignant brain tumor(l(3)mbt)	1306.53	313.768	2.058	1.5311e-23	7.4447e-21	sp|Q96JM7|LMBL3_HUMAN Lethal(3)malignant brain tumor-like protein 3 OS=Homo sapiens OX=9606 GN=L3MBTL3 PE=1 SV=2//9.87494e-102
FBgn0037071	CG7632 gene product from transcript CG7632-RA(CG7632)	773.801	186.075	2.0561	2.7198e-07	4.8761e-06	sp|O18391|KRAK_DROME Probable serine hydrolase OS=Drosophila melanogaster OX=7227 GN=kraken PE=2 SV=1//2.04313e-60
FBgn0039507	martik(mrt)	1705.16	411.969	2.0493	6.4324e-20	1.8766e-17	-//-
FBgn0030028	Companion of reaper(Corp)	103.129	24.9767	2.0458	9.7692e-08	2.002e-06	-//-
FBgn0033266	Suppressor of Cytokine Signaling at 44A(Socs44A)	1150.79	279.669	2.0408	1.4098e-12	1.0671e-10	sp|Q8VHQ2|SOCS7_MOUSE Suppressor of cytokine signaling 7 OS=Mus musculus OX=10090 GN=Socs7 PE=1 SV=1//4.73299e-21
FBgn0027091	Cysteinyl-tRNA synthetase(Aats-cys)	1436.59	349.219	2.0404	1.0143e-08	2.7308e-07	sp|Q7KN90|SYCC_DROME Cysteine--tRNA ligase, cytoplasmic OS=Drosophila melanogaster OX=7227 GN=CysRS PE=1 SV=1//0
FBgn0050098	CG30098 gene product from transcript CG30098-RA(CG30098)	40.1185	9.75422	2.0402	0.0034622	0.016268	sp|Q9VB68|GRASS_DROME Serine protease grass OS=Drosophila melanogaster OX=7227 GN=grass PE=1 SV=1//1.02305e-25
FBgn0266044	ncRNA(CR44809)	79.7034	19.38	2.0401	0.00013592	0.0010665	-//-
FBgn0033458	CG18446 gene product from transcript CG18446-RA(CG18446)	83.6317	20.3589	2.0384	6.5901e-11	3.1165e-09	-//-
FBgn0027836	CG5729 gene product from transcript CG5729-RB(Dgp-1)	5143.16	1276.75	2.0102	1.066e-13	1.0182e-11	sp|D2XV59|GTPB1_RAT GTP-binding protein 1 OS=Rattus norvegicus OX=10116 GN=Gtpbp1 PE=1 SV=1//0
FBgn0003930	small nuclear RNA U4 at 39B(snRNA:U4:39B)	16.6994	4.14594	2.01	0.0018097	0.0095586	-//-
FBgn0040236	CG12132 gene product from transcript CG12132-RB(c11.1)	2831.92	706.773	2.0025	1.3786e-10	5.9949e-09	sp|Q8NDA8|MROH1_HUMAN Maestro heat-like repeat-containing protein family member 1 OS=Homo sapiens OX=9606 GN=MROH1 PE=2 SV=3//1.36128e-99
FBgn0036240	CG6928 gene product from transcript CG6928-RD(CG6928)	873.218	219.233	1.9939	6.4993e-06	7.9066e-05	sp|Q58DD2|S2611_BOVIN Sodium-independent sulfate anion transporter OS=Bos taurus OX=9913 GN=SLC26A11 PE=2 SV=1//1.20341e-92
FBgn0267408	Aldehyde oxidase 1(AOX1)	9542.99	2397.54	1.9929	9.822e-16	1.4868e-13	sp|Q7G192|ALDO2_ARATH Indole-3-acetaldehyde oxidase OS=Arabidopsis thaliana OX=3702 GN=AAO2 PE=1 SV=2//8.3657e-162
FBgn0026404	Death regulator Nedd2-like caspase(Dronc)	698.654	179.818	1.958	2.0008e-11	1.092e-09	sp|Q9XYF4|DRONC_DROME Caspase Dronc OS=Drosophila melanogaster OX=7227 GN=Dronc PE=1 SV=1//0
FBgn0020388	Gcn5 ortholog(Gcn5)	1982.2	512.041	1.9528	7.6696e-12	4.7516e-10	sp|A0A0R4IXF6|KAT2A_DANRE Histone acetyltransferase KAT2A OS=Danio rerio OX=7955 GN=kat2a PE=2 SV=1//0
FBgn0027363	Signal transducing adaptor molecule(Stam)	2585.68	671.317	1.9455	8.9387e-16	1.3826e-13	sp|Q92783|STAM1_HUMAN Signal transducing adapter molecule 1 OS=Homo sapiens OX=9606 GN=STAM PE=1 SV=3//6.71488e-109
FBgn0031267	CG13688 gene product from transcript CG13688-RA(Ipk2)	411.155	106.791	1.9449	2.0163e-07	3.7621e-06	sp|Q7TT16|IPMK_MOUSE Inositol polyphosphate multikinase OS=Mus musculus OX=10090 GN=Ipmk PE=1 SV=1//3.01525e-29
FBgn0053465	CG33465 gene product from transcript CG33465-RC(CG33465)	26.8713	6.9812	1.9445	0.00024372	0.0017676	sp|Q9NAS9|CLP15_ANOGA CLIP domain-containing serine protease B15 OS=Anopheles gambiae OX=7165 GN=ser3 PE=1 SV=1//7.47714e-17
FBgn0243512	puckered(puc)	1389.94	364.026	1.9329	2.2929e-07	4.1903e-06	sp|Q0IID7|DUS10_BOVIN Dual specificity protein phosphatase 10 OS=Bos taurus OX=9913 GN=DUSP10 PE=2 SV=1//6.58306e-32
FBgn0053969	CG33969 gene product from transcript CG33969-RC(CG33969)	983.957	257.849	1.9321	3.8534e-09	1.1733e-07	sp|Q9JMJ2|FBXW4_MOUSE F-box/WD repeat-containing protein 4 OS=Mus musculus OX=10090 GN=Fbxw4 PE=1 SV=1//2.13834e-09
FBgn0023523	Odorant receptor 2a(Or2a)	14.5752	3.82574	1.9297	0.0047622	0.021185	sp|O46077|OR2A_DROME Odorant receptor 2a OS=Drosophila melanogaster OX=7227 GN=Or2a PE=2 SV=2//0
FBgn0037531	CG10445 gene product from transcript CG10445-RD(CG10445)	47.8896	12.6219	1.9238	6.2794e-07	1.0006e-05	sp|P34739|TTF2_DROME Transcription termination factor 2 OS=Drosophila melanogaster OX=7227 GN=lds PE=1 SV=2//9.91053e-14
FBgn0053229	CG33229 gene product from transcript CG33229-RB(CG33229)	1164.51	307.707	1.9201	5.4935e-10	2.0452e-08	-//-
FBgn0029606	CG14052 gene product from transcript CG14052-RB(CG14052)	18.7044	4.96518	1.9135	0.0018956	0.0099446	-//-
FBgn0002891	mutagen-sensitive 205(mus205)	293.131	77.8792	1.9122	1.6527e-12	1.2277e-10	sp|Q61493|REV3L_MOUSE DNA polymerase zeta catalytic subunit OS=Mus musculus OX=10090 GN=Rev3l PE=1 SV=3//4.69723e-60
FBgn0086666	ncRNA(snoRNA:Psi28S-2179)	38.4608	10.2247	1.9113	6.1867e-06	7.6013e-05	-//-
FBgn0040837	CG8620 gene product from transcript CG8620-RA(CG8620)	1431.84	381.549	1.9079	1.7201e-06	2.4254e-05	-//-
FBgn0031432	CG9964 gene product from transcript CG9964-RC(Cyp309a1)	1410.79	377.224	1.903	2.4409e-21	8.7037e-19	sp|Q9VQD2|CP391_DROME Probable cytochrome P450 309a1 OS=Drosophila melanogaster OX=7227 GN=Cyp309a1 PE=1 SV=4//0
FBgn0035488	CG11593 gene product from transcript CG11593-RB(CG11593)	679.27	181.827	1.9014	7.5265e-12	4.7359e-10	sp|Q5BJR4|PRUN2_RAT Protein prune homolog 2 OS=Rattus norvegicus OX=10116 GN=Prune2 PE=1 SV=1//1.2813e-61
FBgn0039733	CG11504 gene product from transcript CG11504-RB(CG11504)	692.088	185.652	1.8984	2.1326e-16	3.8885e-14	-//-
[truncated: 961 more rows]

## Sheet: Aged FHV 24h
Table S6. List of diffrentially expressed genes at least two-fold (D).
[truncated: 818 more rows]

[truncated: 5 more sheets: Aged FHV 48h, Young Tris 24h, Young Tris 48h, Aged Tris 24h, Aged Tris 48h]
