# Supplementary material
Source: publisher figshare collection journal article supplement (https://gsajournals.figshare.com/articles/dataset/_/14348126)
Supplement: Supplementary file 2 [file 2]

**Figure S1**

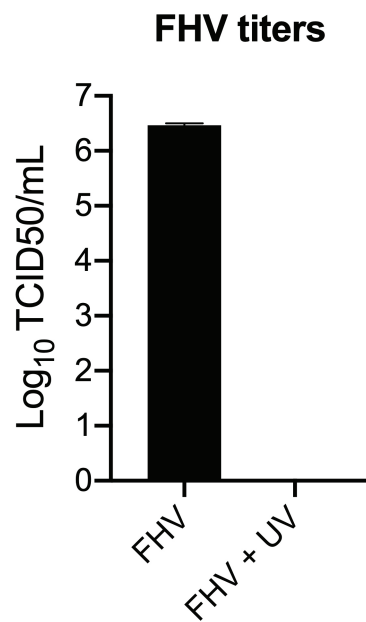

**Supplemental Figure S1.** Virus stock titer determination using the TCID<sub>50</sub> method. UV-treated virus (control) is unable to replicate in DL-1 cells and therefore FHV capsid staining is not detectable with the anti-FHV antibody used in the assay.
