# Supplementary material
Source: publisher figshare collection journal article supplement (https://gsajournals.figshare.com/articles/dataset/_/14348126)
Supplement: Supplementary file 3 [file 2]

Figure S10

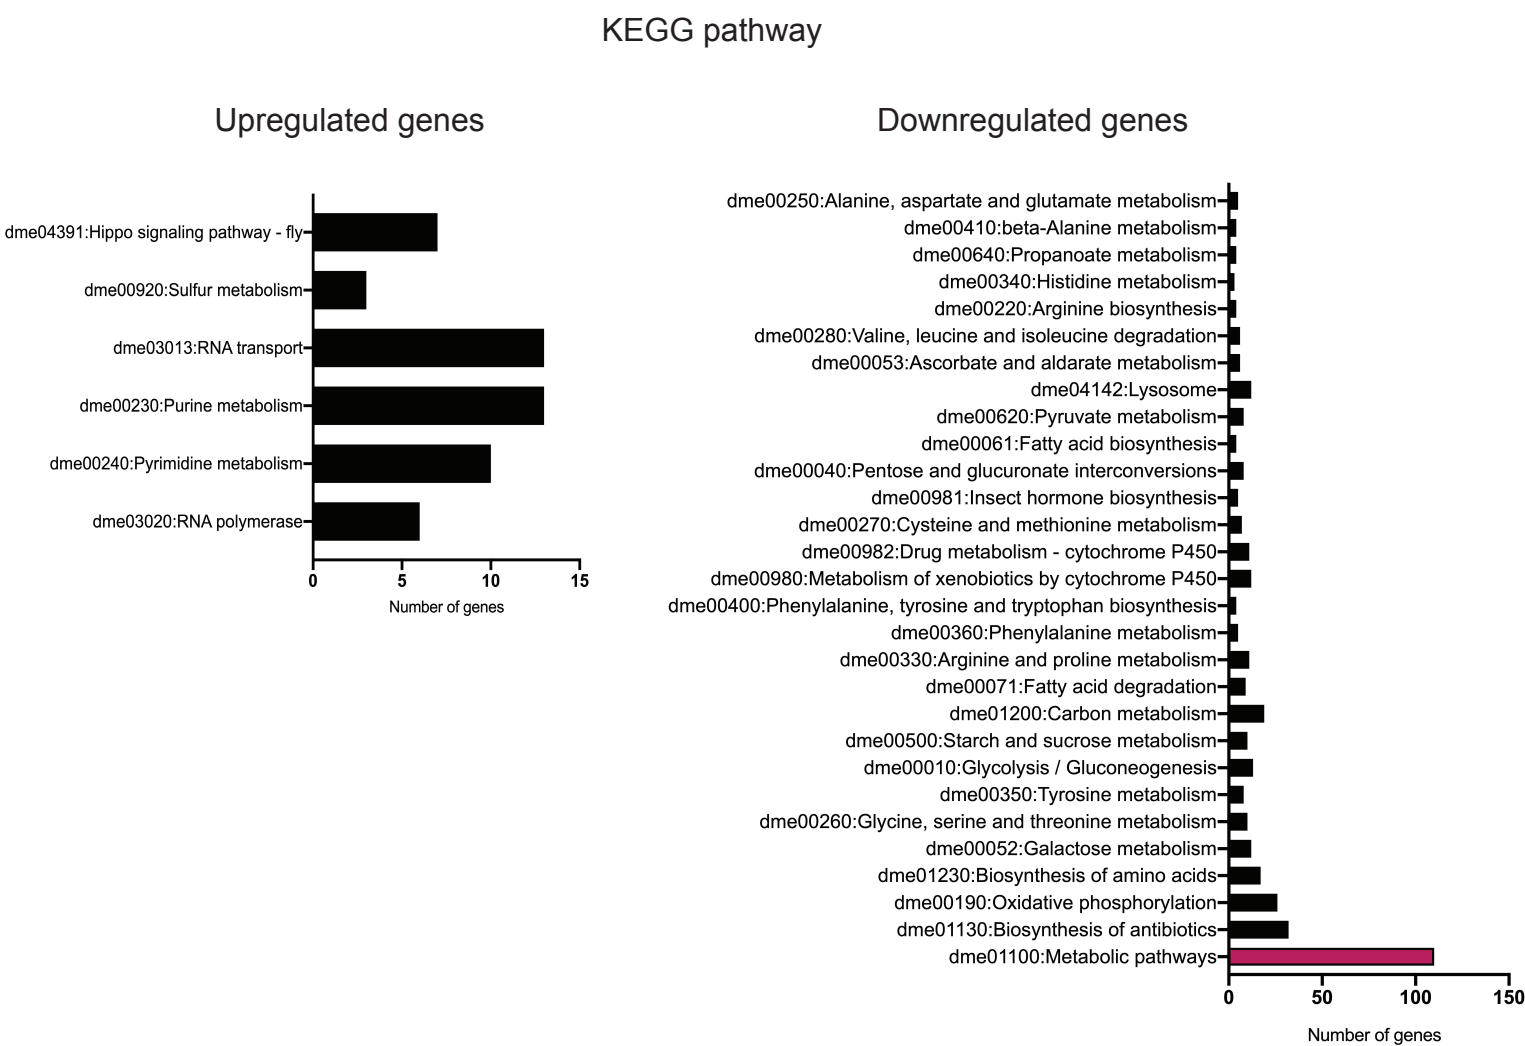

**Supplemental Figure S10.** KEGG pathway enrichment analysis done using DAVID 6.8. database for genes specifically regulated in aged, FHV-infected flies 48h p.i.
