# Supplementary material
Source: publisher figshare collection journal article supplement (https://gsajournals.figshare.com/articles/dataset/_/14348126)
Supplement: Supplementary file 4 [file 2]

**A.**

**B.**

Gene expression (transcript abundance)

Treatment

| Treatment    | Gene expression (transcript abundance) |
|--------------|----------------------------------------|
| Ni 7d        | ~100, ~110                             |
| Ni 25d       | ~110, ~120                             |
| Tris 24h 7d  | ~70, ~100, ~110                        |
| Tris 48h 7d  | ~80, ~90, ~100                         |
| Tris 24h 25d | ~110, ~120                             |
| Tris 48h 25d | ~100, ~110                             |
| FHV 24h 7d   | ~120, ~140                             |
| FHV 48h 7d   | ~210, ~220, ~240                       |
| FHV 24h 25d  | ~170, ~180                             |
| FHV 48h 25d  | ~450, ~460, ~490                       |

Gene expression (transcript abundance)

Treatment

Ni 7d Ni 25d Tris 24h 7d Tris 48h 7d Tris 24h 25d Tris 48h 25d FHV 24h 7d FHV 48h 7d FHV 24h 25d FHV 48h 25d

**Supplemental Figure S8. A.** Heatmap of genes belonging to the GO cluster “Neurogenesis”. The expression scale represents the Z-score ( $Z \text{ score} = (x - \mu) / \sigma$ ), where  $x$ =value,  $\mu$  is mean and  $\sigma$  is standard deviation. **B.** Expression levels of the genes *midlife crisis (mdcl)* (top) and *Ankle2* (bottom) in each experimental condition based on transcript abundance determined in the RNA-Seq.
