# Supplementary material
Source: publisher figshare collection journal article supplement (https://gsajournals.figshare.com/articles/dataset/_/14348126)
Supplement: Supplementary file 5 [file 2]

**Table S2. List of primers used for RT-qPCR**

| <b>Gene name</b>   | <b>Forward primer (5' → 3')</b> | <b>Reverse primer (5' → 3')</b> | <b>Reference</b>                      |
|--------------------|---------------------------------|---------------------------------|---------------------------------------|
| <i>Cpr67Fb</i>     | GAGACCACCAAGTACCGCAA            | TGGACGTTCCGTATTCCCAG            | This study                            |
| <i>CG15199</i>     | GATACGCCACTGCGACAAAC            | CAGCACTCGGGGAACCTTGAA           | This study                            |
| <i>Acp54A1</i>     | GGTTTTGCTGTGCTTGGCAT            | TCCAAGGCGACACTTCATCG            | This study                            |
| <i>Lman III</i>    | GGAAGTCCACCAGCACGTTA            | AGCCACTCAAACCTCCACTCG           | This study                            |
| <i>Socs36E</i>     | GCACAGAAGGCAGACC                | ACGTAGGAGACCCGTAT               | (TROHA AND BUCHON 2019)               |
| <i>Ets21c</i>      | GAGGCCGATTAATGCCATGC            | GTTGGTGGGAACCTCCGTCT            | This study                            |
| <i>Rfabg</i>       | CATTGCACCCCAAGCAGATG            | CAGCGCGGAAGGGATAATCT            | This study                            |
| <i>Diedel 3</i>    | GCGTGGGTTCGTGCAATATC            | AGTTTCCAGTGAGACAGCCG            | This study                            |
| <i>Or85a</i>       | ACCGTAATGGAGCGTGTGT             | TGTTGGTCAGGGATTGCGAA            | This study                            |
| <i>Upd3</i>        | GCGGGGAGGATGTACC                | GTCTTCATGGAATGAGCC              | (TROHA AND BUCHON 2019)               |
| <i>IM14</i>        | GCGGCTTTTTCTTCGCTCTG            | GCATGAATGACTTGGGTGCC            | This study                            |
| <i>GNBP-Like 3</i> | CAATGGACGCTGGACTTA              | ACCTCTGGTTGTAGTTGTG             | (BARAJAS-AZPELETA <i>et al.</i> 2018) |
| <i>CR45445</i>     | AGCAGATGACCAGCACACTC            | TCAGTGCTATGGCGCTAACT            | This study                            |
| <i>CR46083</i>     | TGTTCTAAAGGCCCGGATGG            | GCTACGAAATCCTGCCCTGA            | This study                            |
| <i>Attacin C</i>   | CTGCACTGGACTACTCCCACATCA        | CGATCCTGCGACTGCCAAAGATTG        | (KOUNATIDIS <i>et al.</i> 2017)       |
| <i>RpL32</i>       | AAGAAGCGCACCAAGCACTTCATC        | TCTGTTGTCGATACCCTTGGGCTT        | (KOUNATIDIS <i>et al.</i> 2017)       |
| <i>FHV 1</i>       | TTTAGAGCACATGCGTCCAG            | CGCTCACTTTCTTCGGGTTA            | (MAJZOUB <i>et al.</i> 2014)          |

## References

- Barajas-Azpeleta, R., J. Wu, J. Gill, R. Welte, C. Seidel *et al.*, 2018 Antimicrobial peptides modulate long-term memory. *PLoS Genet* 14: e1007440.
- Kounatidis, I., S. Chtarbanova, Y. Cao, M. Hayne, D. Jayanth *et al.*, 2017 NF-kappaB Immunity in the Brain Determines Fly Lifespan in Healthy Aging and Age-Related Neurodegeneration. *Cell Rep* 19: 836-848.
- Majzoub, K., M. L. Hafirassou, C. Meignin, A. Goto, S. Marzi *et al.*, 2014 RACK1 controls IRES-mediated translation of viruses. *Cell* 159: 1086-1095.
- Troha, K., and N. Buchon, 2019 Methods for the study of innate immunity in *Drosophila melanogaster*. *Wiley Interdiscip Rev Dev Biol* 8: e344.
