# Supplementary material
Source: publisher figshare collection journal article supplement (https://gsajournals.figshare.com/articles/dataset/_/14348126)
Supplement: Supplementary file 7 [file 2]

Figure S12

*Attacin C*

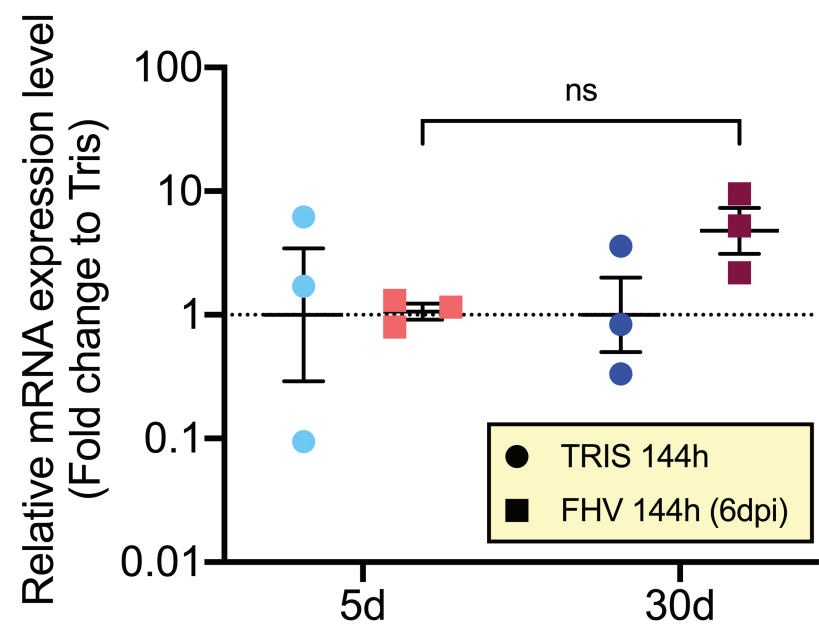

**Supplemental Figure S12.** *Attacin C* expression in young and aged male flies at 6 days post injection with either Tris or FHV. The graph represents mean  $\pm$  SEM from three independent experiments. Each symbol represents a pool of 5 flies. ns=non significant ( $P=0.5173$ ) based on 2-way ANOVA with Tukey's post test.
