# Supplementary material
Source: publisher figshare collection journal article supplement (https://gsajournals.figshare.com/articles/dataset/_/14348126)
Supplement: Supplementary file 8 [file 2]

Figure S9

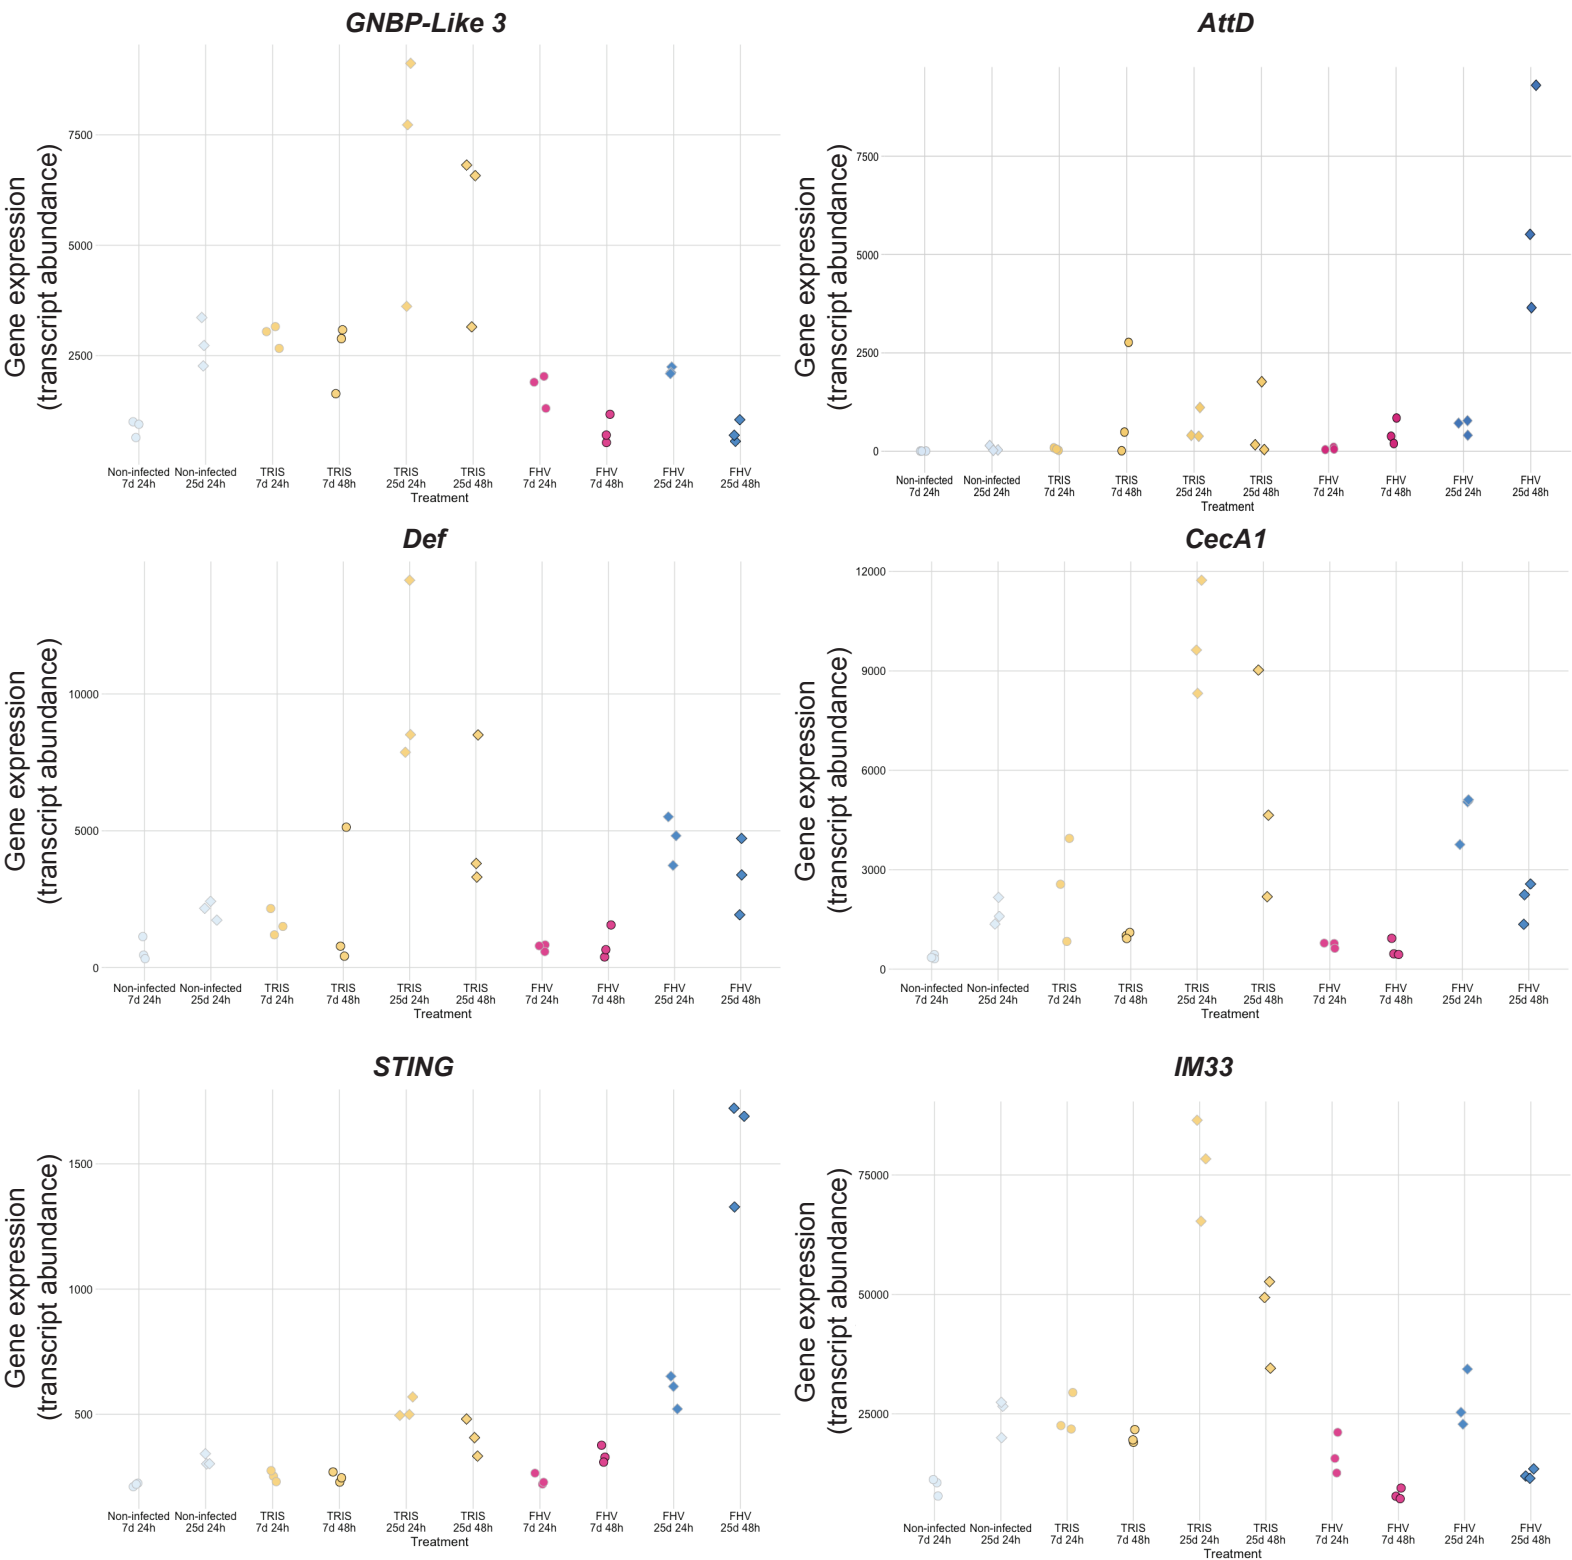

Supplemental Figure S9. Expression levels of corresponding innate immunity genes in each experimental condition based on transcript abundance determined in the RNA-Seq.
