# Supplementary material
Source: publisher figshare collection journal article supplement (https://gsajournals.figshare.com/articles/dataset/_/14348126)
Supplement: Supplementary file 9 [file 2]

Figure S2

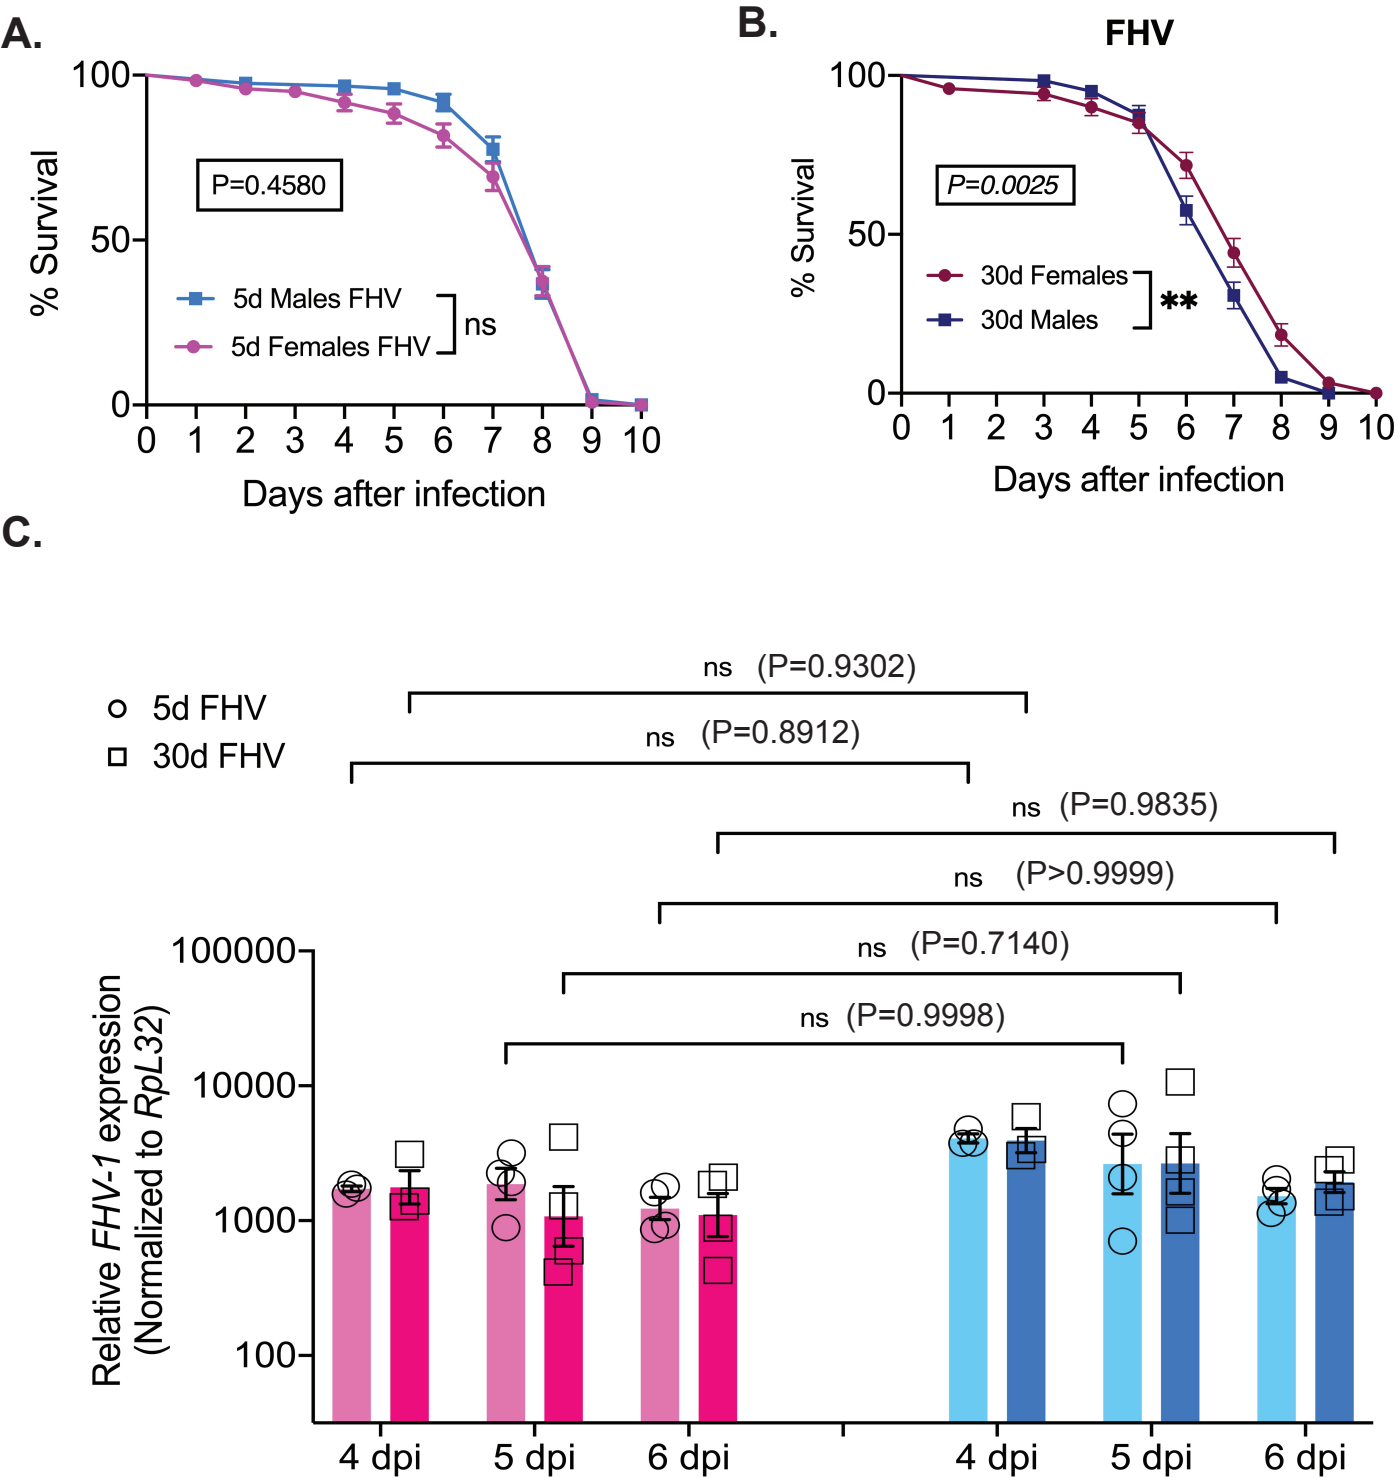

**Supplemental Figure S2. A.** Non-significant difference in survival of FHV is observed between young male and female *Oregon R* flies. The graph compares the survival curves of 5d old male and female flies from 12 independent injection experiments done in groups of 10 flies. ns,  $P=0.4580$ . **B.** Significant difference in survival of FHV is observed between aged male and female *Oregon R* flies. The graph compares the survival curves of 30d old male and female flies from 12 independent injection experiments done in groups of 8-10 flies. \*\*  $P=0.0025$ . **A and B.** In all survival graphs error bars represent standard error. Survival curves are compared using a Log-Rank (Mantel-Cox) statistical test. **C.** The differences in FHV-1 expression between male and female young and aged flies are non statistically significant. The graph represents mean  $\pm$  SEM from three or four independent experiments. Each symbol represents a pool of 5 flies. ns=non significant,  $P>0.05$  based on 2-way ANOVA with Tukey's post test. Exact P values are shown in parenthesis.
