# Supplementary material
Source: publisher figshare collection journal article supplement (https://gsajournals.figshare.com/articles/dataset/_/14348126)
Supplement: Supplementary file 10 [file 2]

**Figure S6**

- Number of genes in common between Young FHV 24h and Aged FHV 24h
- Number of genes in common between Young FHV 24h and Aged FHV 24h overlapping with genes in common between Young FHV 48h and Aged FHV 48h
- Number of genes in common between Young FHV 48h and Aged FHV 48h

Up-regulated genes

Down-regulated genes

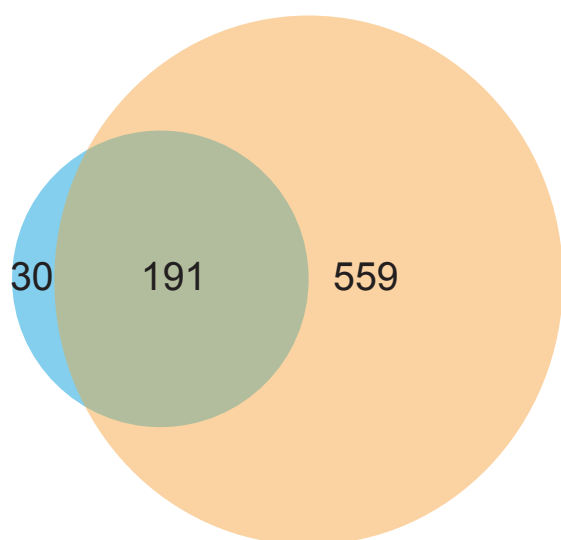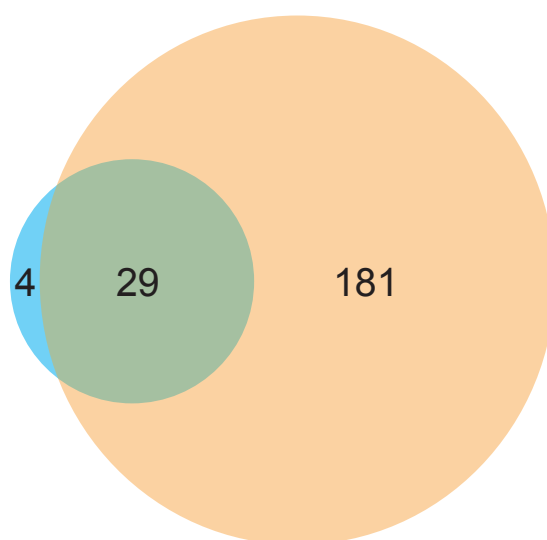

**Supplemental Figure S6.** Venn diagrams showing the overlap between 24h and 48h of commonly regulated genes between young and aged FHV-infected flies.
