# Supplementary material
Source: publisher figshare collection journal article supplement (https://gsajournals.figshare.com/articles/dataset/_/14348126)
Supplement: Supplementary file 11 [file 2]

**Table S7. Number of genes with present/absent DAVID database IDs.**

| <b>Experimental group</b> | <b>Total number of genes regulated at least two-fold with FBgn ID</b> | <b>Number of genes with matching DAVID database IDs</b> | <b>Number of genes without matching DAVID database ID</b> |
|---------------------------|-----------------------------------------------------------------------|---------------------------------------------------------|-----------------------------------------------------------|
| <b>Aging</b>              | 1639                                                                  | 1631                                                    | 8                                                         |
| <b>Young Tris 24h</b>     | 231                                                                   | 231                                                     | 0                                                         |
| <b>Young Tris 48h</b>     | 505                                                                   | 505                                                     | 0                                                         |
| <b>Aged Tris 24h</b>      | 456                                                                   | 455                                                     | 1                                                         |
| <b>Aged Tris 48h</b>      | 196                                                                   | 196                                                     | 0                                                         |
| <b>Young FHV 24h</b>      | 505                                                                   | 501                                                     | 4                                                         |
| <b>Young FHV 48h</b>      | 1168                                                                  | 1157                                                    | 11                                                        |
| <b>Aged FHV 24h</b>       | 816                                                                   | 808                                                     | 8                                                         |
| <b>Aged FHV 48h</b>       | 2625                                                                  | 2603                                                    | 22                                                        |
