# Supplementary material
Source: publisher figshare collection journal article supplement (https://gsajournals.figshare.com/articles/dataset/_/14348126)
Supplement: Supplementary file 12 [file 2]

**Table S1. RNA-Seq samples: age and treatment.**

| <i>Sample #ID</i> | <i>Age</i> | <i>Injection Type</i> | <i>Timepoint post<br/>FHV injection</i> |
|-------------------|------------|-----------------------|-----------------------------------------|
| yN24_1            | 6-9d       | Ni                    | -                                       |
| yN24_2            | 6-9d       | Ni                    | -                                       |
| yN24_3            | 6-9d       | Ni                    | -                                       |
| yT24_4            | 6-9d       | Tris                  | 24h                                     |
| yT24_5            | 6-9d       | Tris                  | 24h                                     |
| yT24_6            | 6-9d       | Tris                  | 24h                                     |
| yF24_7            | 6-9d       | FHV                   | 24h                                     |
| yF24_8            | 6-9d       | FHV                   | 24h                                     |
| yF24_9            | 6-9d       | FHV                   | 24h                                     |
| yT48_10           | 6-9d       | Tris                  | 48h                                     |
| yT48_11           | 6-9d       | Tris                  | 48h                                     |
| yT48_12           | 6-9d       | Tris                  | 48h                                     |
| yF48_13           | 6-9d       | FHV                   | 48h                                     |
| yF48_14           | 6-9d       | FHV                   | 48h                                     |
| yF48_15           | 6-9d       | FHV                   | 48h                                     |
| oN24_16           | 22-26d     | Ni                    | -                                       |
| oN24_17           | 22-26d     | Ni                    | -                                       |
| oN24_18           | 22-26d     | Ni                    | -                                       |
| oT24_19           | 25-28d     | Tris                  | 24h                                     |
| oT24_20           | 25-28d     | Tris                  | 24h                                     |
| oT24_21           | 25-28d     | Tris                  | 24h                                     |
| oF24_22           | 25-28d     | FHV                   | 24h                                     |
| oF24_23           | 25-28d     | FHV                   | 24h                                     |
| oF24_24           | 25-28d     | FHV                   | 24h                                     |
| oT48_25           | 25-29d     | Tris                  | 48h                                     |
| oT48_26           | 25-29d     | Tris                  | 48h                                     |
| oT48_27           | 25-29d     | Tris                  | 48h                                     |
| oF48_28           | 25-28d     | FHV                   | 48h                                     |
| oF48_29           | 25-28d     | FHV                   | 48h                                     |
| oF48_30           | 25-28d     | FHV                   | 48h                                     |
