# Supplementary material
Source: publisher figshare collection journal article supplement (https://gsajournals.figshare.com/articles/dataset/_/14348126)
Supplement: Supplementary file 13 [file 2]

Figure S4

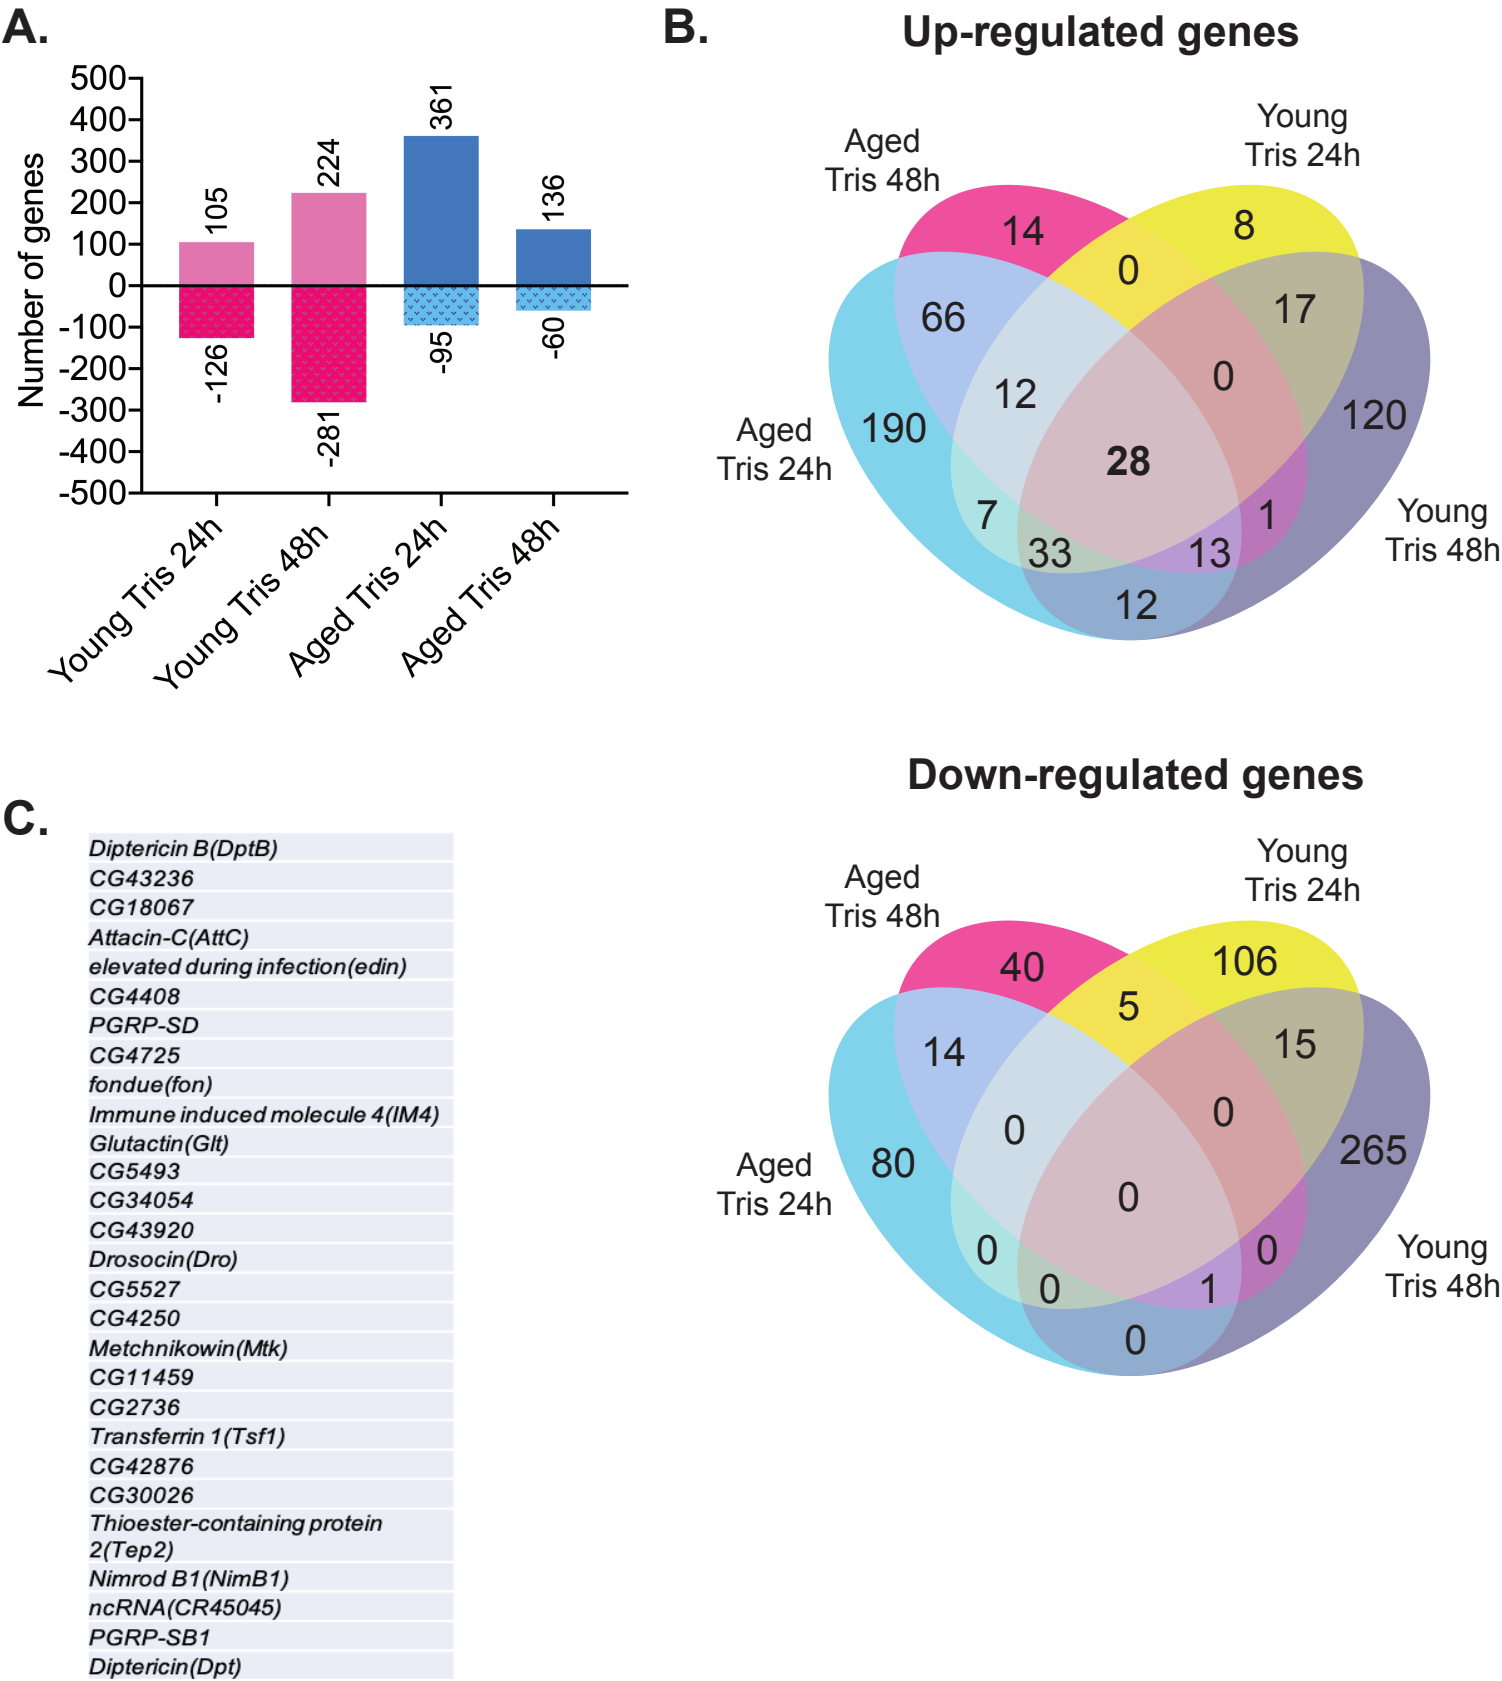

**Supplemental Figure S4. A.** Comparison of the number of differentially regulated genes at least two-fold in all conditions. Positive values represent upregulated genes and negative values represent downregulated genes. **B.** Venn diagrams showing overlaps between differentially regulated genes for selected experimental conditions. **C.** List of genes commonly upregulated between young and aged flies 24h and 48h following Tris injection.
