# Supplementary material
Source: publisher figshare collection journal article supplement (https://gsajournals.figshare.com/articles/dataset/_/14348126)
Supplement: Supplementary file 14 [file 2]

**Table S5. Mapping Results Details.**

| Sample name     | Total reads | Mapped reads         | Multiple mapped   | Uniquely mapped      | Reads map to '+'     | Reads map to '-'     | Non-splice reads     | Splice reads         |
|-----------------|-------------|----------------------|-------------------|----------------------|----------------------|----------------------|----------------------|----------------------|
| Aged FHV24-1    | 41531914    | 39512254<br>(95.14%) | 518011<br>(1.25%) | 38994243<br>(93.89%) | 19480270<br>(46.9%)  | 19513973<br>(46.99%) | 29351537<br>(70.67%) | 9642706<br>(23.22%)  |
| Aged FHV24-2    | 42879432    | 40924450<br>(95.44%) | 492931<br>(1.15%) | 40431519<br>(94.29%) | 20195572<br>(47.1%)  | 20235947<br>(47.19%) | 31461421<br>(73.37%) | 8970098<br>(20.92%)  |
| Aged FHV24-3    | 40294296    | 38492801<br>(95.53%) | 482054<br>(1.2%)  | 38010747<br>(94.33%) | 18992213<br>(47.13%) | 19018534<br>(47.2%)  | 29654716<br>(73.6%)  | 8356031<br>(20.74%)  |
| Aged FHV48-1    | 42993982    | 40941385<br>(95.23%) | 557121<br>(1.3%)  | 40384264<br>(93.93%) | 20173390<br>(46.92%) | 20210874<br>(47.01%) | 31760826<br>(73.87%) | 8623438<br>(20.06%)  |
| Aged FHV48-2    | 46626088    | 44663049<br>(95.79%) | 576914<br>(1.24%) | 44086135<br>(94.55%) | 22020904<br>(47.23%) | 22065231<br>(47.32%) | 34419735<br>(73.82%) | 9666400<br>(20.73%)  |
| Aged FHV48-3    | 46938414    | 45031561<br>(95.94%) | 567712<br>(1.21%) | 44463849<br>(94.73%) | 22215929<br>(47.33%) | 22247920<br>(47.4%)  | 34743950<br>(74.02%) | 9719899<br>(20.71%)  |
| Aged Non-inf-1  | 41754964    | 39783940<br>(95.28%) | 488535<br>(1.17%) | 39295405<br>(94.11%) | 19634871<br>(47.02%) | 19660534<br>(47.09%) | 29606680<br>(70.91%) | 9688725<br>(23.2%)   |
| Aged Non-inf-2  | 44009154    | 41703873<br>(94.76%) | 573029<br>(1.3%)  | 41130844<br>(93.46%) | 20547131<br>(46.69%) | 20583713<br>(46.77%) | 30679822<br>(69.71%) | 10451022<br>(23.75%) |
| Aged Non-inf-3  | 47447696    | 45042280<br>(94.93%) | 620263<br>(1.31%) | 44422017<br>(93.62%) | 22189657<br>(46.77%) | 22232360<br>(46.86%) | 33389769<br>(70.37%) | 11032248<br>(23.25%) |
| Aged Tris24-1   | 46618452    | 44533385<br>(95.53%) | 494887<br>(1.06%) | 44038498<br>(94.47%) | 22024440<br>(47.24%) | 22014058<br>(47.22%) | 32207303<br>(69.09%) | 11831195<br>(25.38%) |
| Aged Tris24-2   | 51865854    | 49501870<br>(95.44%) | 604659<br>(1.17%) | 48897211<br>(94.28%) | 24448470<br>(47.14%) | 24448741<br>(47.14%) | 36175330<br>(69.75%) | 12721881<br>(24.53%) |
| Aged Tris24-3   | 43390554    | 41243604<br>(95.05%) | 487458<br>(1.12%) | 40756146<br>(93.93%) | 20374909<br>(46.96%) | 20381237<br>(46.97%) | 30189361<br>(69.58%) | 10566785<br>(24.35%) |
| Aged Tris48-1   | 41067454    | 39129283<br>(95.28%) | 461809<br>(1.12%) | 38667474<br>(94.16%) | 19333530<br>(47.08%) | 19333944<br>(47.08%) | 28670107<br>(69.81%) | 9997367<br>(24.34%)  |
| Aged Tris48-2   | 38104700    | 36372742<br>(95.45%) | 438393<br>(1.15%) | 35934349<br>(94.3%)  | 17964747<br>(47.15%) | 17969602<br>(47.16%) | 26827598<br>(70.4%)  | 9106751<br>(23.9%)   |
| Aged Tris48-3   | 43635216    | 41812838<br>(95.82%) | 459656<br>(1.05%) | 41353182<br>(94.77%) | 20671234<br>(47.37%) | 20681948<br>(47.4%)  | 31847053<br>(72.98%) | 9506129<br>(21.79%)  |
| Young FHV24-1   | 45062656    | 43404191<br>(96.32%) | 432591<br>(0.96%) | 42971600<br>(95.36%) | 21472558<br>(47.65%) | 21499042<br>(47.71%) | 33712333<br>(74.81%) | 9259267<br>(20.55%)  |
| Young FHV24-2   | 37691062    | 36039114<br>(95.62%) | 403161<br>(1.07%) | 35635953<br>(94.55%) | 17805843<br>(47.24%) | 17830110<br>(47.31%) | 26985334<br>(71.6%)  | 8650619<br>(22.95%)  |
| Young FHV24-3   | 42233746    | 40186874<br>(95.15%) | 487052<br>(1.15%) | 39699822<br>(94%)    | 19835508<br>(46.97%) | 19864314<br>(47.03%) | 29870157<br>(70.73%) | 9829665<br>(23.27%)  |
| Young FHV48-1   | 39901114    | 38143981<br>(95.6%)  | 430229<br>(1.08%) | 37713752<br>(94.52%) | 18845525<br>(47.23%) | 18868227<br>(47.29%) | 28652338<br>(71.81%) | 9061414<br>(22.71%)  |
| Young FHV48-2   | 39169108    | 37480006<br>(95.69%) | 446041<br>(1.14%) | 37033965<br>(94.55%) | 18507397<br>(47.25%) | 18526568<br>(47.3%)  | 28124871<br>(71.8%)  | 8909094<br>(22.75%)  |
| Young FHV48-3   | 41931260    | 40138297<br>(95.72%) | 462008<br>(1.1%)  | 39676289<br>(94.62%) | 19826206<br>(47.28%) | 19850083<br>(47.34%) | 30311932<br>(72.29%) | 9364357<br>(22.33%)  |
| Young Non-inf-1 | 41715218    | 39826494<br>(95.47%) | 418701<br>(1%)    | 39407793<br>(94.47%) | 19682742<br>(47.18%) | 19725051<br>(47.29%) | 30064488<br>(72.07%) | 9343305<br>(22.4%)   |
| Young Non-inf-2 | 42037394    | 40278290<br>(95.82%) | 437501<br>(1.04%) | 39840789<br>(94.77%) | 19906209<br>(47.35%) | 19934580<br>(47.42%) | 30590150<br>(72.77%) | 9250639<br>(22.01%)  |
| Young Non-inf-3 | 42197994    | 40408296<br>(95.76%) | 438060<br>(1.04%) | 39970236<br>(94.72%) | 19974073<br>(47.33%) | 19996163<br>(47.39%) | 30403454<br>(72.05%) | 9566782<br>(22.67%)  |
| Young Tris24-1  | 56381882    | 53863160<br>(95.53%) | 558229<br>(0.99%) | 53304931<br>(94.54%) | 26635147<br>(47.24%) | 26669784<br>(47.3%)  | 40890788<br>(72.52%) | 12414143<br>(22.02%) |
| Young Tris24-2  | 40412126    | 38479965<br>(95.22%) | 401597<br>(0.99%) | 38078368<br>(94.23%) | 19030011<br>(47.09%) | 19048357<br>(47.14%) | 28845796<br>(71.38%) | 9232572<br>(22.85%)  |
| Young Tris24-3  | 45596772    | 43400605<br>(95.18%) | 452854<br>(0.99%) | 42947751<br>(94.19%) | 21458418<br>(47.06%) | 21489333<br>(47.13%) | 32743478<br>(71.81%) | 10204273<br>(22.38%) |

|                |          |          |         |          |          |          |          |          |
|----------------|----------|----------|---------|----------|----------|----------|----------|----------|
|                |          | 36287017 | 420877  | 35866140 | 17924867 | 17941273 | 27123071 | 8743069  |
| Young Tris48-1 | 38102524 | (95.24%) | (1.1%)  | (94.13%) | (47.04%) | (47.09%) | (71.18%) | (22.95%) |
|                |          | 39342180 | 452559  | 38889621 | 19427959 | 19461662 | 29363067 | 9526554  |
| Young Tris48-2 | 41332648 | (95.18%) | (1.09%) | (94.09%) | (47%)    | (47.09%) | (71.04%) | (23.05%) |
|                |          | 38272339 | 419715  | 37852624 | 18916129 | 18936495 | 28639263 | 9213361  |
| Young Tris48-3 | 40134822 | (95.36%) | (1.05%) | (94.31%) | (47.13%) | (47.18%) | (71.36%) | (22.96%) |

**Total reads:** Total number of filtered reads.

**Total mapped:** Total number of reads that can be mapped to the reference genome.

**Multiple mapped:** Number of reads that can be mapped to multiple sites in the reference genome.

**Uniquely mapped:** Number of reads that can be uniquely mapped to the reference genome.

Reads map to '+', Reads map to '-': Number of reads that map to the positive strand (+) or the minus strand (-).

**Splice reads:** Splice reads can be segmented and mapped to two exons (also named junction reads), whereas non-splice reads can be mapped entirely to a single exon. The ratio of splice reads depends on the insert size used in the RNA-seq experiments.
