# Supplementary material
Source: publisher figshare collection journal article supplement (https://gsajournals.figshare.com/articles/dataset/_/14348126)
Supplement: Supplementary file 15 [file 2]

Figure S11

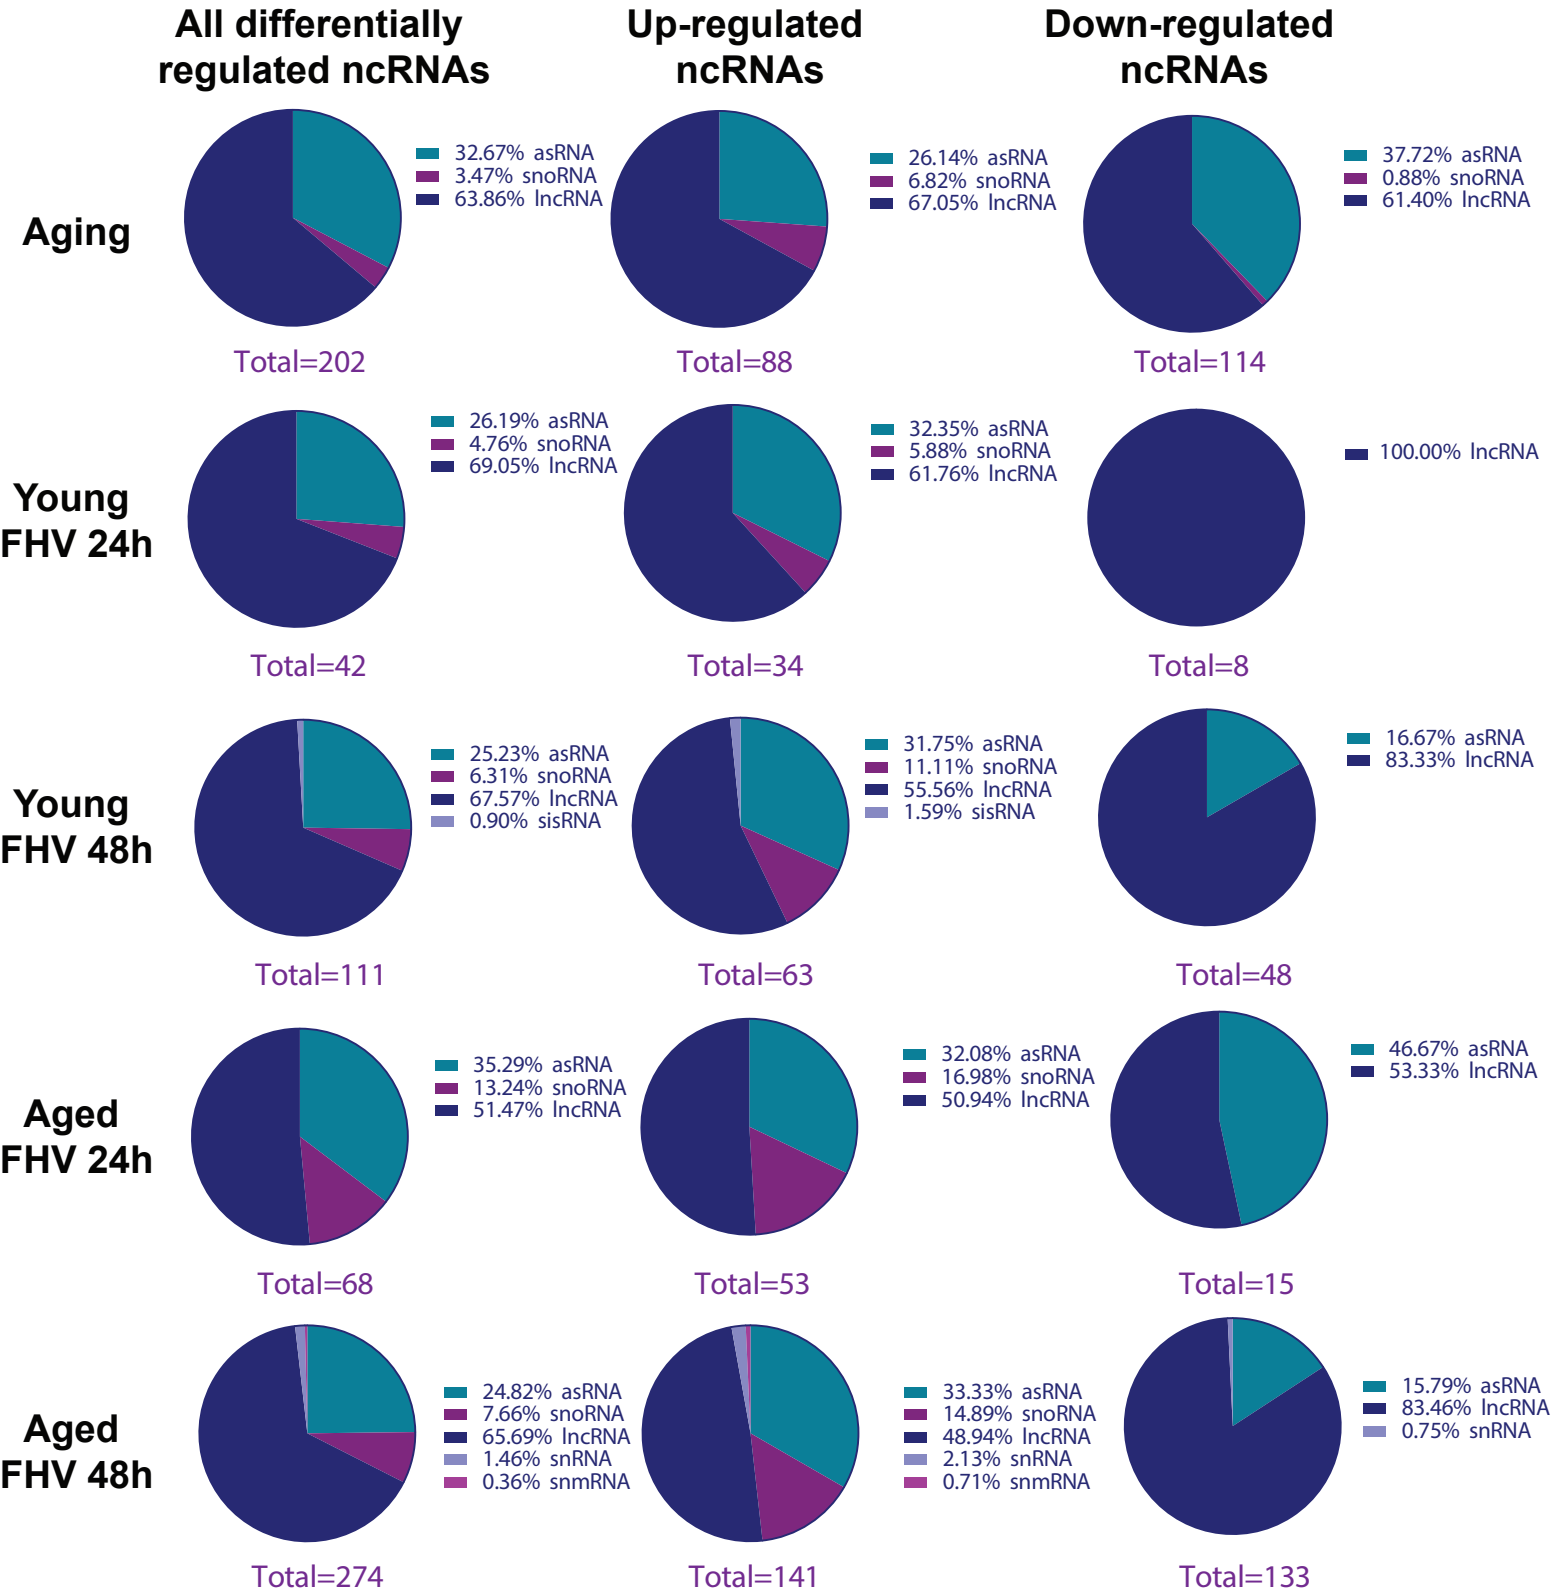

**Supplemental Figure S11.** Distribution of different classes of differentially regulated ncRNAs among experimental samples.
