# Supplementary material
Source: publisher figshare collection journal article supplement (https://gsajournals.figshare.com/articles/dataset/_/14348126)
Supplement: Supplementary file 16 [file 2]

**Figure S7**

■ Genes matching respective DAVID GO category      ■ Other genes

## Biological process

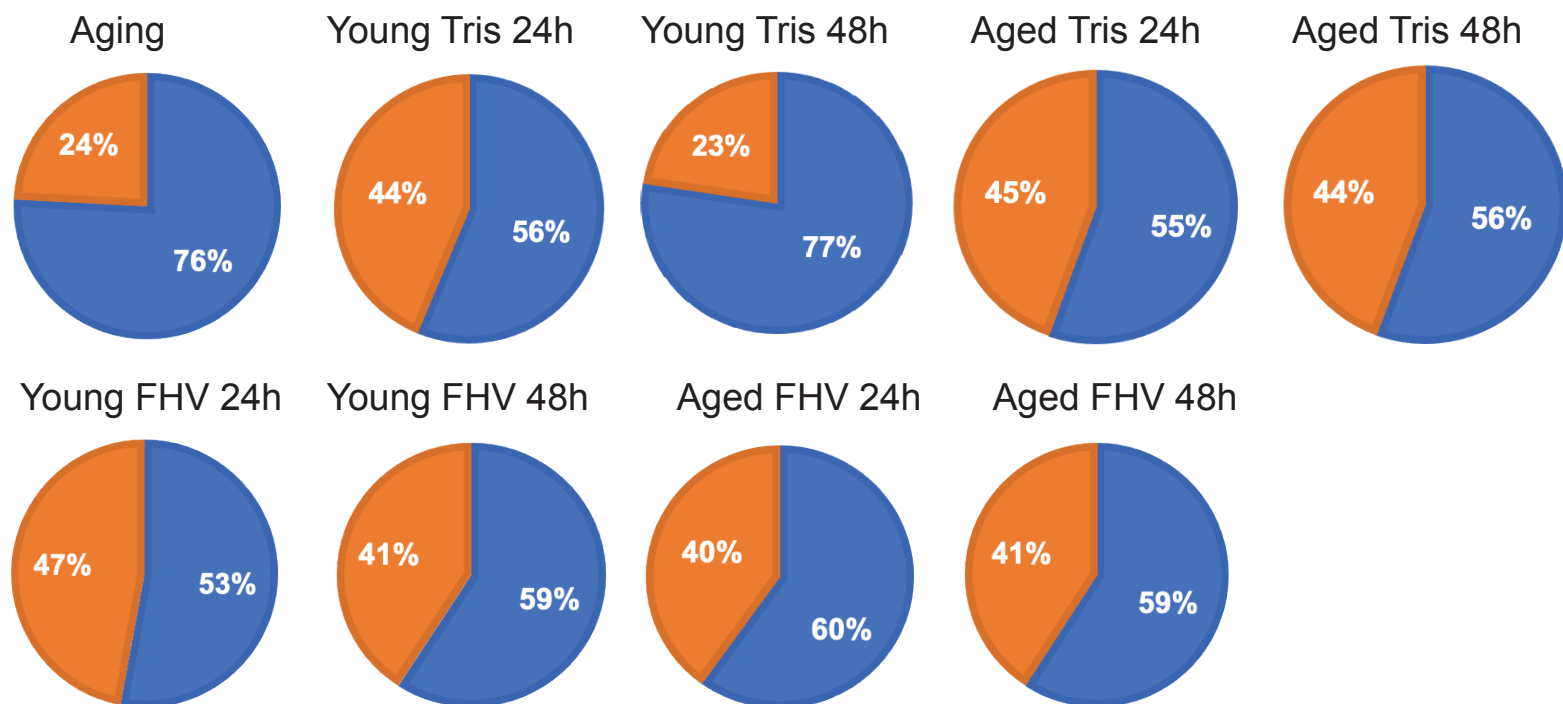

**Supplemental Figure S7.** Proportions of differentially regulated genes with identifiable GO categories, based on GO term analysis using DAVID 6.8 database.
