# Supplementary material
Source: publisher figshare collection journal article supplement (https://gsajournals.figshare.com/articles/dataset/_/14348126)
Supplement: Supplementary file 17 [file 2]

Figure S5

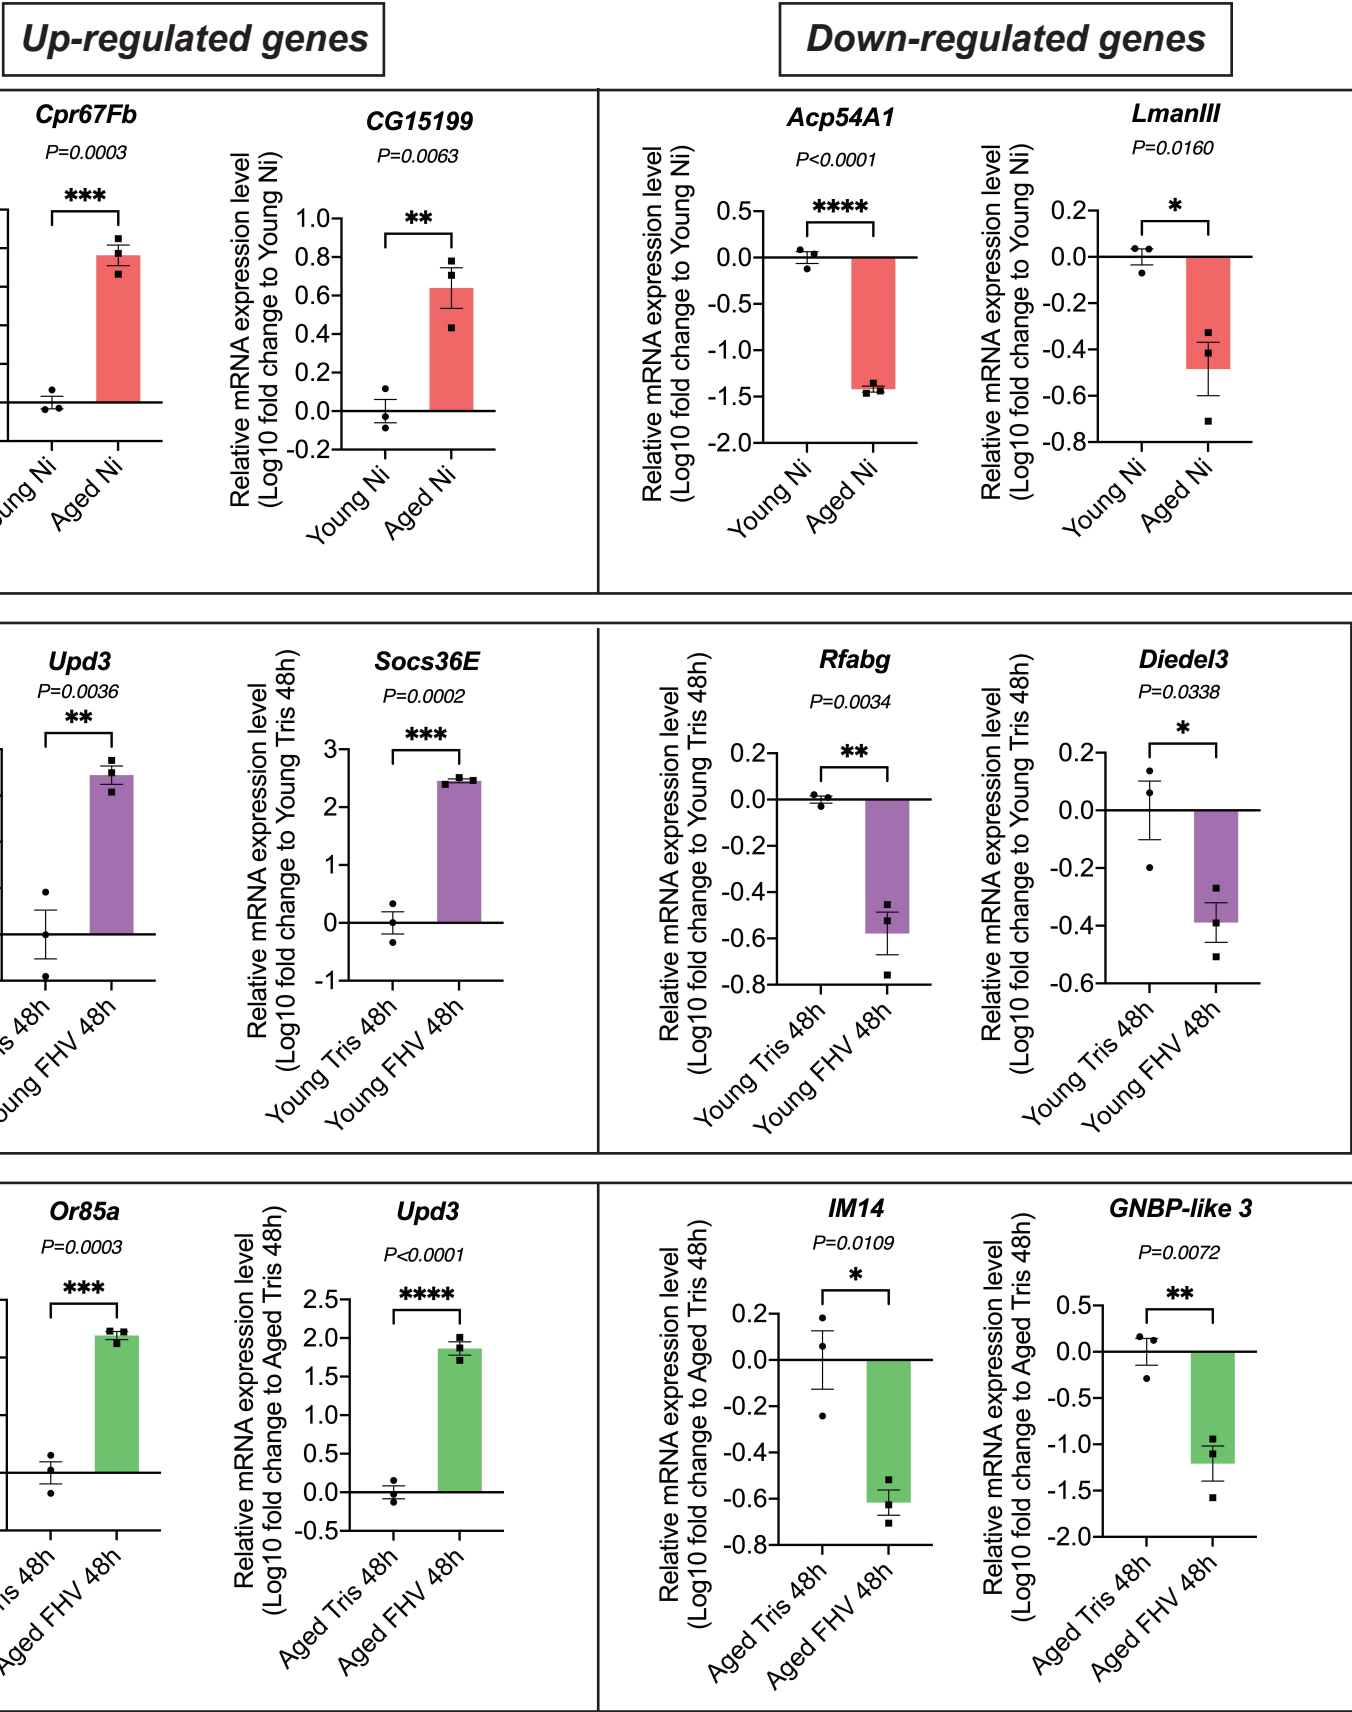

**Supplemental Figure S5.** Validation of RNA-Seq gene expression. The expression of four genes per experimental condition was determined using RT-qPCR. Relative gene expression to the housekeeping gene *RpL32* was determined using the  $\Delta\Delta C_t$  method and fold change calculated to respective controls. Graphs represent the mean  $\pm$  SEM from three biological replicates with 15 flies each. Statistical significance was calculated using a two-tailed, parametric unpaired *t* test using the fold change values converted as Log10 values. P values are indicated on each graph.
