# Supplementary material
Source: publisher figshare collection journal article supplement (https://gsajournals.figshare.com/articles/dataset/_/14348126)
Supplement: Supplementary file 18 [file 2]

| Sample name     | Raw reads | Clean reads | Raw bases | Clean bases | Error rate (%) | Q20(%) | Q30(%) | GC content(%) |
|-----------------|-----------|-------------|-----------|-------------|----------------|--------|--------|---------------|
| Aged FHV24-1    | 43181358  | 41531914    | 6.5G      | 6.2G        | 0.03           | 97.62  | 93.32  | 48.55         |
| Aged FHV24-2    | 43835068  | 42879432    | 6.6G      | 6.4G        | 0.03           | 97.41  | 92.77  | 46.78         |
| Aged FHV24-3    | 41306752  | 40294296    | 6.2G      | 6G          | 0.03           | 97.52  | 93.01  | 47.27         |
| Aged FHV48-1    | 43643790  | 42993982    | 6.5G      | 6.4G        | 0.03           | 97.35  | 92.7   | 47.85         |
| Aged FHV48-2    | 47676076  | 46626088    | 7.2G      | 7G          | 0.03           | 97.93  | 94.02  | 47.78         |
| Aged FHV48-3    | 48076860  | 46938414    | 7.2G      | 7G          | 0.03           | 97.9   | 93.99  | 48.51         |
| Aged Non-inf-1  | 42640642  | 41754964    | 6.4G      | 6.3G        | 0.03           | 97.59  | 93.26  | 48.79         |
| Aged Non-inf-2  | 45245250  | 44009154    | 6.8G      | 6.6G        | 0.03           | 97.58  | 93.3   | 48.24         |
| Aged Non-inf-3  | 48714724  | 47447696    | 7.3G      | 7.1G        | 0.03           | 97.77  | 93.72  | 47.81         |
| Aged Tris24-1   | 47657110  | 46618452    | 7.1G      | 7G          | 0.03           | 97.76  | 93.66  | 48.95         |
| Aged Tris24-2   | 52770316  | 51865854    | 7.9G      | 7.8G        | 0.03           | 97.69  | 93.52  | 48.71         |
| Aged Tris24-3   | 44515816  | 43390554    | 6.7G      | 6.5G        | 0.03           | 97.58  | 93.25  | 48.49         |
| Aged Tris48-1   | 42122914  | 41067454    | 6.3G      | 6.2G        | 0.03           | 97.55  | 93.18  | 49.19         |
| Aged Tris48-2   | 38879250  | 38104700    | 5.8G      | 5.7G        | 0.03           | 97.84  | 93.74  | 48.85         |
| Aged Tris48-3   | 44595486  | 43635216    | 6.7G      | 6.5G        | 0.03           | 97.57  | 93.15  | 47.16         |
| Young FHV24-1   | 46225316  | 45062656    | 6.9G      | 6.8G        | 0.03           | 97.62  | 93.25  | 47.3          |
| Young FHV24-2   | 38577182  | 37691062    | 5.8G      | 5.7G        | 0.03           | 97.62  | 93.32  | 48.45         |
| Young FHV24-3   | 43430650  | 42233746    | 6.5G      | 6.3G        | 0.03           | 97.39  | 92.85  | 48.08         |
| Young FHV48-1   | 41222318  | 39901114    | 6.2G      | 6G          | 0.03           | 97.41  | 92.89  | 49.47         |
| Young FHV48-2   | 39984078  | 39169108    | 6G        | 5.9G        | 0.03           | 97.63  | 93.31  | 49.28         |
| Young FHV48-3   | 42843394  | 41931260    | 6.4G      | 6.3G        | 0.03           | 97.58  | 93.2   | 49.07         |
| Young Non-inf-1 | 43123072  | 41715218    | 6.5G      | 6.3G        | 0.03           | 97.27  | 92.61  | 48.95         |
| Young Non-inf-2 | 43597424  | 42037394    | 6.5G      | 6.3G        | 0.03           | 97.7   | 93.49  | 48.98         |
| Young Non-inf-3 | 43279546  | 42197994    | 6.5G      | 6.3G        | 0.03           | 97.59  | 93.28  | 48.81         |
| Young Tris24-1  | 58677044  | 56381882    | 8.8G      | 8.5G        | 0.03           | 97.42  | 92.9   | 48.78         |
| Young Tris24-2  | 41739006  | 40412126    | 6.3G      | 6.1G        | 0.03           | 97.52  | 93.13  | 48.32         |
| Young Tris24-3  | 47251712  | 45596772    | 7.1G      | 6.8G        | 0.03           | 97.45  | 92.99  | 48.03         |
| Young Tris48-1  | 39189084  | 38102524    | 5.9G      | 5.7G        | 0.03           | 97.44  | 92.96  | 48.16         |
| Young Tris48-2  | 42894488  | 41332648    | 6.4G      | 6.2G        | 0.03           | 97.41  | 92.86  | 47.9          |
| Young Tris48-3  | 41444186  | 40134822    | 6.2G      | 6G          | 0.03           | 97.48  | 92.99  | 48.31         |

**Table S4. RNA seq samples quality control.**

Raw Reads: the original sequencing reads counts

Clean Reads: number of reads after filtering

Raw Bases: raw reads number multiply read length, saved in G unit

Clean Bases: clean reads number multiply read length, saved in G unit

Error Rate: average sequencing error rate, which is calculated by  $Q_{phred} = -10\log_{10}(e)$

Q20: percentages of bases whose correct base recognition rates are greater than 99% in total bases

Q30: percentages of bases whose correct base recognition rates are greater than 99.9% in total bases

GC content: percentages of G and C in total bases
